# Supplementary material for: Genetic Background Modulates lncRNA-Coordinated Tissue Response to Low Dose Ionizing Radiation
Source: Int J Genomics. 2015 Feb 23;2015:461038. doi: 10.1155/2015/461038 (PMC4353441; doi:10.1155/2015/461038)
Supplement: Supplementary file 1 — Supplementary Data: The supplementary data include supplementary tables (S1 to S4) and supplementary figures (S1 to S3). Table S1: LncRNA and mRNA mammary tissue expression signatures of strain differences and after LDIR. Table S2: Baseline gene expression differences in mammary gland tissue of BALB/c and SPRET/EiJ are associated with diverse biological funcitons. Table S3: Upstream transcriptional regulators associated with low-dose radiation response in mammary glands of BALB/c and SPRET/EiJ mice. Table S4: Correlations between lncRNA and coding RNA expression in BALB/c and SPRET/EiJ mammary tissues after LDIR exposure. Figure S1: LncRNA and coding RNA expression changes in mammary tissues of BALB/c and SPRET/EiJ mice. For each time-point, differentially expressed lncRNA (A) or coding RNAs (B) between sham and low-dose irradiated glands were identified by the unpaired Student's t-test with a p-value cut-off of 0.05 and a fold change criteria of more than 1.5. C. Comparison of differentially expressed lncRNAs (left) and coding RNAs (right) in BALB/c and SPRET/EiJ mice four weeks after LDIR exposure. (BC=BALB/c; SPR=SPRET/EiJ; lnc=lncRNA; cd=coding gene). Figure S2: LncRNA and coding RNA expression levels are correlated in mammary tissues after low dose radiation exposure. Representative examples of networks of the same lncRNAs (pink) significantly correlated in expression with mRNAs (purple) after LDIR in mammary tissues of BALB/c mice at 2 and 4 weeks after exposure, 4 and 8 weeks after exposure and 2 and 8 weeks after exposure. Figure S3: Annotation of the molecular shapes used in gene interaction networks. Graphical representation of commonly used molecular shapes in interaction networks generated by Ingenuity Pathway Analysis. [file 461038.f1.zip]

Archive with 11 entries (10 files):
- Table_S1_diffexpression.xlsx
- __MACOSX/
- __MACOSX/._Table_S1_diffexpression.xlsx
- Table_S2_GObaseline.xlsx
- __MACOSX/._Table_S2_GObaseline.xlsx
- Table_S3_upstream.xlsx
- __MACOSX/._Table_S3_upstream.xlsx
- Table_S4_correlations.xlsx
- __MACOSX/._Table_S4_correlations.xlsx
- Table_S5.xlsx
- __MACOSX/._Table_S5.xlsx
