# Supplementary material for: Genetic Background Modulates lncRNA-Coordinated Tissue Response to Low Dose Ionizing Radiation
Source: Int J Genomics. 2015 Feb 23;2015:461038. doi: 10.1155/2015/461038 (PMC4353441; doi:10.1155/2015/461038)
Supplement: Supplementary file 1 — Supplementary Data: The supplementary data include supplementary tables (S1 to S4) and supplementary figures (S1 to S3). Table S1: LncRNA and mRNA mammary tissue expression signatures of strain differences and after LDIR. Table S2: Baseline gene expression differences in mammary gland tissue of BALB/c and SPRET/EiJ are associated with diverse biological funcitons. Table S3: Upstream transcriptional regulators associated with low-dose radiation response in mammary glands of BALB/c and SPRET/EiJ mice. Table S4: Correlations between lncRNA and coding RNA expression in BALB/c and SPRET/EiJ mammary tissues after LDIR exposure. Figure S1: LncRNA and coding RNA expression changes in mammary tissues of BALB/c and SPRET/EiJ mice. For each time-point, differentially expressed lncRNA (A) or coding RNAs (B) between sham and low-dose irradiated glands were identified by the unpaired Student's t-test with a p-value cut-off of 0.05 and a fold change criteria of more than 1.5. C. Comparison of differentially expressed lncRNAs (left) and coding RNAs (right) in BALB/c and SPRET/EiJ mice four weeks after LDIR exposure. (BC=BALB/c; SPR=SPRET/EiJ; lnc=lncRNA; cd=coding gene). Figure S2: LncRNA and coding RNA expression levels are correlated in mammary tissues after low dose radiation exposure. Representative examples of networks of the same lncRNAs (pink) significantly correlated in expression with mRNAs (purple) after LDIR in mammary tissues of BALB/c mice at 2 and 4 weeks after exposure, 4 and 8 weeks after exposure and 2 and 8 weeks after exposure. Figure S3: Annotation of the molecular shapes used in gene interaction networks. Graphical representation of commonly used molecular shapes in interaction networks generated by Ingenuity Pathway Analysis. [file 461038.f1.zip › Table_S1_diffexpression.xlsx]

## Sheet: Baseline_Blbc_vs_SPR
Table S1. LncRNA and mRNA mammary tissue expression signatures of strain differences and after LDIR.
Up	Down
A_52_P430169	A_55_P1955950
A_65_P18981	A_51_P394115
A_55_P2132697	A_52_P24439
A_51_P328968	A_66_P140954
A_55_P2129354	A_55_P2116515
A_55_P2334942	A_55_P1995698
A_55_P2029612	A_55_P2007919
A_51_P134627	A_55_P2145307
A_51_P159612	A_51_P257841
A_51_P284823	A_55_P2085586
A_55_P2103060	A_55_P2036086
A_55_P2135031	A_55_P1972172
A_51_P481159	A_55_P1955183
A_55_P1957249	A_55_P1963508
A_55_P2074631	A_55_P2010216
A_55_P2189955	A_55_P2170599
A_66_P106983	A_55_P1954569
A_55_P2145139	A_55_P2282869
A_52_P161087	A_55_P1966838
A_55_P2155002	A_55_P1971630
A_55_P1978201	A_51_P128075
A_55_P2073647	A_55_P1997434
A_55_P2119263	A_55_P1971724
A_55_P2034600	A_51_P427828
A_55_P2142863	A_55_P1965079
A_52_P494115	A_52_P400355
A_55_P1976690	A_55_P2162807
A_55_P2077079	A_55_P2054803
A_51_P491051	A_55_P2110935
A_55_P2114596	A_51_P424532
A_55_P2227154	A_55_P2006084
A_52_P400509	A_51_P187679
A_55_P1977289	A_55_P2279927
A_55_P2102679	A_55_P1966755
A_55_P2043267	A_52_P52156
A_55_P2349752	A_66_P113008
A_55_P1971229	A_55_P2013843
A_51_P188772	A_51_P450169
A_55_P2040518	A_55_P2023902
A_55_P2133562	A_66_P139159
A_55_P2158107	A_55_P2068733
A_52_P745	A_55_P2080476
A_55_P1991851	A_55_P2132207
A_51_P156158	A_52_P315423
A_55_P2104835	A_55_P2096917
A_66_P107745	A_55_P2093749
A_51_P448814	A_55_P1995404
A_55_P2149269	A_55_P1956048
A_55_P2138956	A_52_P470466
A_55_P1994042	A_55_P1996674
A_51_P388374	A_51_P150653
A_52_P405206	A_52_P303176
A_55_P2216456	A_55_P2045136
A_55_P2148370	A_51_P178828
A_55_P1996299	A_55_P2033480
A_52_P530280	A_55_P1981167
A_55_P2071731	A_55_P1954835
A_55_P2262287	A_55_P2014854
A_52_P108321	A_55_P2101340
A_51_P301964	A_51_P455338
A_52_P249920	A_55_P2385792
A_55_P2014411	A_55_P2025944
A_55_P2107957	A_66_P101251
A_55_P2066399	A_55_P1997424
A_55_P2079485	A_55_P2148340
A_52_P684130	A_55_P2141943
A_55_P2036220	A_55_P2017789
A_55_P2049388	A_51_P515462
A_55_P2038697	A_55_P2122604
A_55_P2079041	A_55_P2046109
A_66_P106836	A_55_P2179793
A_55_P2030506	A_55_P2122605
A_55_P2101123	A_51_P472531
A_55_P2003483	A_52_P651248
A_66_P120305	A_51_P517695
A_66_P115513	A_55_P2303868
A_55_P1957319	A_52_P77227
A_66_P123938	A_52_P679101
A_55_P2324712	A_55_P2097393
A_55_P2061094	A_55_P2026139
A_55_P1955998	A_55_P2131060
A_55_P2061134	A_52_P439263
A_51_P520927	A_55_P2079645
A_51_P510764	A_52_P235102
A_51_P234544	A_66_P107038
A_55_P2264321	A_55_P2151609
A_55_P2418082	A_55_P2094611
A_51_P476601	A_55_P2115477
A_51_P478722	A_55_P2006023
A_55_P2364315	A_55_P2168243
A_55_P2032294	A_51_P343356
A_55_P2093163	A_55_P1983958
A_51_P396385	A_55_P2166326
A_52_P491073	A_52_P508974
A_55_P2100715	A_51_P444437
A_52_P677956	A_55_P1982329
A_55_P1994194	A_51_P461429
A_52_P529195	A_51_P441469
A_52_P191086	A_55_P2123199
A_51_P262515	A_55_P2020981
A_55_P2080598	A_55_P2074366
A_52_P76402	A_51_P206965
A_52_P330540	A_51_P493987
A_55_P1973267	A_55_P2044463
A_55_P2075358	A_55_P2048378
A_55_P2130610	A_55_P2217230
A_55_P2148082	A_55_P2185950
A_55_P1986351	A_55_P2000718
A_51_P310164	A_55_P2049252
A_66_P112164	A_52_P399140
A_55_P1953961	A_55_P2058448
A_55_P2148239	A_55_P2007646
A_55_P1955417	A_55_P2156855
A_66_P123683	A_55_P1959648
A_51_P314161	A_55_P2088131
A_51_P227770	A_52_P510119
A_55_P2097729	A_55_P2084820
A_55_P1984023	A_55_P2006436
A_51_P410927	A_55_P1966029
A_52_P575771	A_55_P2329298
A_55_P2017075	A_55_P2099750
A_55_P1979950	A_51_P117226
A_55_P2090394	A_66_P110707
A_55_P1999309	A_55_P1987585
A_55_P2055257	A_55_P2138159
A_51_P460398	A_55_P2006366
A_55_P1987730	A_55_P1994047
A_55_P2075200	A_51_P481768
A_55_P2167620	A_51_P129149
A_51_P464118	A_66_P119421
A_55_P2243431	A_52_P467046
A_51_P318640	A_55_P2161238
A_55_P2048493	A_51_P369784
A_51_P438952	A_51_P336599
A_51_P232474	A_65_P19112
A_51_P436483	A_55_P2169994
A_55_P1992319	A_55_P2000027
A_55_P2151689	A_55_P1977583
A_55_P2146389	A_55_P1960846
A_55_P1958350	A_55_P2014853
A_55_P2104876	A_55_P2137828
A_51_P411264	A_52_P60353
A_51_P343913	A_55_P2094686
A_51_P166339	A_66_P102891
A_55_P1965233	A_55_P2051778
A_55_P2134496	A_52_P667287
A_55_P1998354	A_55_P2020050
A_55_P2379599	A_52_P110689
A_52_P151320	A_55_P1967514
A_51_P370470	A_55_P2082929
A_51_P161946	A_52_P672722
A_51_P285779	A_66_P132295
A_52_P108089	A_55_P1992329
A_55_P2026049	A_55_P2120433
A_55_P2033507	A_52_P500002
A_66_P119350	A_52_P671794
A_55_P2105002	A_66_P134090
A_55_P2017312	A_55_P1999992
A_55_P2249220	A_55_P1962568
A_55_P2175494	A_51_P329818
A_55_P2046793	A_66_P129469
A_55_P2050366	A_51_P327188
A_55_P2120956	A_55_P2104440
A_52_P93066	A_66_P120949
A_51_P506683	A_51_P483473
A_66_P123787	A_55_P2161126
A_52_P52618	A_52_P75348
A_52_P367520	A_55_P1986158
A_55_P2044381	A_55_P2412607
A_55_P2205650	A_55_P1987059
A_55_P2088401	A_55_P1975140
A_51_P120066	A_66_P105689
A_55_P1960023	A_55_P1974432
A_55_P2130256	A_55_P1966878
A_51_P506045	A_52_P649285
A_52_P585699	A_55_P2177112
A_55_P2044843	A_55_P2139886
A_55_P2110185	A_51_P150120
A_52_P45797	A_66_P108143
A_52_P532687	A_55_P2041529
A_55_P1958447	A_52_P459929
A_52_P552547	A_55_P2064203
A_52_P136709	A_55_P2200780
A_66_P111224	A_52_P135873
A_55_P2156731	A_52_P48546
A_51_P291078	A_55_P2116608
A_55_P1971154	A_55_P2139341
A_51_P334789	A_55_P2066548
A_52_P189957	A_55_P2134616
A_55_P2071541	A_55_P2178064
A_55_P2165239	A_51_P403610
A_55_P1988058	A_52_P164797
A_52_P372165	A_52_P770640
A_55_P2159830	A_55_P2048423
A_55_P2015687	A_66_P132037
A_51_P518488	A_55_P1964594
A_55_P2072522	A_55_P2166501
A_55_P2142439	A_51_P381006
A_55_P1956457	A_55_P2182001
A_52_P620748	A_55_P2051313
A_51_P408227	A_55_P1983426
A_55_P2186332	A_51_P299632
A_51_P170008	A_55_P1965906
A_55_P2372666	A_55_P1989225
A_66_P139683	A_51_P122141
A_55_P2144766	A_52_P612382
A_52_P20357	A_55_P2055970
A_66_P134809	A_55_P2075794
A_55_P2403325	A_51_P241843
A_55_P1954945	A_55_P1975155
A_55_P1963724	A_51_P404110
A_51_P235440	A_55_P1965876
A_55_P2184334	A_55_P2009857
A_51_P492346	A_66_P101703
A_55_P2389518	A_55_P1973930
A_55_P2152014	A_55_P2340735
A_55_P2114651	A_55_P2075136
A_55_P2111197	A_55_P2080130
A_51_P505322	A_52_P266530
A_55_P2037873	A_55_P2162792
A_51_P320980	A_52_P253317
A_51_P295663	A_55_P1975166
A_52_P177373	A_55_P2040031
A_55_P2069554	A_55_P1972054
A_51_P288549	A_55_P2050203
A_55_P2172924	A_55_P1967950
A_52_P475080	A_51_P422625
A_55_P2119463	A_65_P08776
A_55_P2060498	A_55_P1953723
A_51_P345316	A_51_P128320
A_55_P2120615	A_55_P2122180
A_55_P2092696	A_52_P56751
A_55_P2121426	A_51_P142175
A_55_P2013858	A_55_P2035167
A_66_P110633	A_55_P2066230
A_55_P1979620	A_55_P2002727
A_55_P2371281	A_55_P2038313
A_51_P169032	A_55_P2155216
A_55_P2147220	A_52_P478236
A_55_P2234414	A_55_P2035667
A_55_P1963031	A_52_P393589
A_55_P2185347	A_52_P256426
A_55_P2146122	A_55_P2179069
A_51_P232858	A_55_P2172832
A_52_P223521	A_51_P289742
A_51_P452768	A_51_P437289
A_55_P2349243	A_55_P2106827
A_55_P1970385	A_51_P472329
A_55_P2152962	A_55_P2134148
A_55_P2148248	A_51_P493105
A_51_P103650	A_51_P312035
A_51_P379710	A_55_P2041976
A_51_P440327	A_51_P261999
A_52_P139788	A_52_P427240
A_52_P359257	A_55_P1999408
A_55_P2015530	A_55_P1995354
A_55_P2054315	A_52_P156190
A_55_P2063257	A_55_P2177899
A_55_P1974855	A_55_P2122200
A_51_P335981	A_55_P2174501
A_55_P2151556	A_52_P599162
A_55_P2205638	A_51_P468505
A_51_P400463	A_55_P2410240
A_55_P2058851	A_55_P2071466
A_51_P161265	A_55_P1953311
A_55_P2125791	A_55_P2069331
A_55_P2037712	A_55_P1953919
A_55_P2073789	A_55_P2184189
A_52_P433828	A_55_P2006494
A_51_P362738	A_52_P359965
A_55_P2001458	A_55_P2072842
A_55_P1954910	A_55_P2183622
A_55_P2170605	A_55_P2020602
A_55_P2255146	A_52_P304947
A_51_P227445	A_55_P2123727
A_55_P2055055	A_52_P235278
A_55_P2150248	A_51_P323148
A_55_P1993761	A_55_P2033020
A_55_P2083879	A_51_P162676
A_52_P214408	A_55_P1979669
A_52_P509710	A_66_P138999
A_51_P245546	A_52_P356204
A_52_P460704	A_52_P444637
A_55_P2328092	A_55_P2180909
A_55_P2081616	A_55_P2000658
A_55_P1958480	A_55_P1986296
A_55_P2025248	A_55_P1998461
A_55_P2334424	A_52_P615312
A_51_P350048	A_51_P511899
A_55_P2331844	A_55_P2159994
A_52_P510202	A_55_P2070494
A_51_P340402	A_55_P2017755
A_55_P1970700	A_51_P331841
A_55_P2333797	A_51_P443293
A_55_P2117164	A_51_P339822
A_55_P2095784	A_55_P2032718
A_55_P2113375	A_55_P2025937
A_55_P1982585	A_55_P1959064
A_55_P2016459	A_52_P606826
A_51_P497100	A_55_P2324654
A_51_P210474	A_55_P2117903
A_66_P119283	A_55_P2008452
A_55_P1957739	A_52_P78922
A_55_P2131506	A_55_P2136817
A_55_P2120354	A_55_P2106922
A_51_P185292	A_52_P349143
A_51_P511418	A_51_P483280
A_66_P111578	A_55_P2076288
A_55_P2063256	A_51_P132013
A_55_P1981050	A_51_P422124
A_52_P15674	A_55_P2087322
A_52_P670978	A_65_P08971
A_51_P160913	A_55_P2104327
A_55_P2095153	A_66_P127175
A_51_P374991	A_51_P484842
A_55_P2110915	A_52_P537852
A_55_P2086825	A_51_P172502
A_55_P1972019	A_51_P262144
A_51_P329322	A_55_P2255399
A_55_P2031636	A_55_P2117760
A_52_P85765	A_55_P1954643
A_55_P2212458	A_55_P2042833
A_55_P2105406	A_55_P2053241
A_55_P2082314	A_51_P235687
A_55_P2164070	A_55_P2090633
A_66_P105175	A_66_P102076
A_52_P203691	A_51_P451075
A_51_P106952	A_52_P483129
A_51_P201480	A_55_P1989544
A_55_P2011545	A_55_P2017699
A_52_P11061	A_55_P2097178
A_55_P2058923	A_55_P2057720
A_51_P379083	A_52_P317923
A_55_P2249556	A_51_P135357
A_55_P1966337	A_55_P2060284
A_51_P509669	A_55_P2050448
A_65_P05152	A_52_P330395
A_55_P1970335	A_52_P679205
A_55_P2363030	A_51_P223575
A_52_P571746	A_55_P2053251
A_51_P450924	A_55_P2097828
A_52_P101238	A_55_P2254968
A_66_P114167	A_55_P2251082
A_51_P408584	A_55_P2069885
A_52_P385536	A_51_P411757
A_55_P2073965	A_55_P2051914
A_55_P2030334	A_55_P2049071
A_51_P180452	A_52_P965502
A_66_P108468	A_55_P2146314
A_51_P437938	A_55_P2056192
A_55_P2136686	A_55_P2078084
A_55_P1952768	A_55_P1998631
A_52_P436318	A_55_P2034260
A_55_P2118873	A_55_P1990435
A_52_P148289	A_55_P2016376
A_55_P1990849	A_55_P1961140
A_55_P2045367	A_55_P2039981
A_55_P2067116	A_55_P2059936
A_52_P40504	A_51_P121275
A_55_P2140171	A_51_P219505
A_51_P289697	A_55_P2036337
A_55_P2192729	A_55_P2137431
A_55_P1972541	A_51_P518893
A_55_P1960738	A_55_P2120866
A_55_P2202524	A_55_P2078238
A_52_P70027	A_51_P439836
A_55_P2021471	A_52_P483301
A_55_P2352344	A_55_P1994862
A_55_P1990815	A_55_P2098200
A_55_P2387104	A_52_P671625
A_51_P227718	A_55_P2018706
A_51_P473219	A_55_P2112120
A_55_P2040805	A_51_P414396
A_52_P662244	A_66_P100093
A_55_P2145908	A_55_P2016346
A_52_P341339	A_51_P474454
A_55_P2373987	A_55_P2015520
A_55_P1953533	A_51_P435321
A_55_P2049262	A_55_P2002918
A_51_P189943	A_55_P2233296
A_55_P2344943	A_52_P179068
A_55_P2144364	A_55_P2124425
A_51_P476261	A_51_P161037
A_55_P2433218	A_55_P2032267
A_52_P86073	A_52_P29953
A_52_P647291	A_55_P2128042
A_55_P2281624	A_55_P1974783
A_55_P2177712	A_55_P2129207
A_52_P75146	A_51_P412809
A_51_P155174	A_55_P2031466
A_52_P223508	A_55_P2070492
A_51_P176071	A_55_P2118103
A_52_P556082	A_51_P323180
A_51_P421538	A_55_P2039761
A_55_P2170500	A_55_P2158483
A_51_P466221	A_52_P359502
A_52_P210909	A_55_P1986863
A_52_P420504	A_51_P447668
A_52_P161806	A_55_P2009994
A_52_P270145	A_55_P1993864
A_55_P2075127	A_55_P2174967
A_55_P2171196	A_66_P105307
A_55_P2052265
A_55_P2330069
A_55_P2142226
A_55_P1978750
A_55_P2153762
A_55_P2367007
A_55_P2012552
A_55_P1984259
A_55_P1969058
A_51_P181922
A_55_P2033557
A_55_P2351193
A_55_P1972763
A_55_P2049261
A_51_P432851
A_51_P302167
A_66_P121976
A_55_P2154709
A_65_P09523
A_52_P653937
A_55_P2084332
A_55_P2018132
A_55_P2034779
A_55_P2075213
A_51_P477285
A_51_P460954
A_52_P278327
A_51_P398766
A_55_P2124586
A_51_P155142
A_55_P2008790
A_55_P2004532
A_52_P321751
A_55_P2359610
A_55_P2045916
A_55_P2060107
A_55_P1973417
A_55_P1981195
A_55_P2178972
A_51_P386870
A_55_P2118799
A_55_P2130501
A_55_P2146495
A_55_P2327577
A_55_P1973848
A_55_P2078048
A_51_P316902
A_55_P2246014
A_55_P2095010
A_66_P132515
A_55_P2003221
A_66_P111090
A_65_P17869
A_52_P763938
A_55_P2417936
A_55_P2148674
A_55_P2059337
A_55_P1963895
A_55_P2269394
A_51_P318830
A_55_P2170519
A_55_P2206461
A_55_P2156638
A_52_P186962
A_55_P2175160
A_52_P573336
A_52_P880457
A_55_P2178491
A_55_P1959238
A_55_P2000454
A_55_P2211164
A_55_P2080902
A_55_P2116674
A_51_P115738
A_55_P2359560
A_55_P1970299
A_55_P2104289
A_55_P2117594
A_52_P618132
A_55_P2036967
A_55_P2157575
A_52_P211418
A_55_P2117656
A_51_P407074
A_55_P2146022
A_55_P2124085
A_52_P155124
A_66_P116326
A_55_P1987520
A_55_P2046605
A_52_P622230
A_51_P326685
A_55_P2262753
A_55_P2014540
A_55_P2228122
A_55_P1965655
A_55_P2184264
A_55_P2017977
A_55_P2256586
A_55_P2083153
A_55_P2417379
A_52_P214034
A_55_P2143119
A_55_P2019601
A_51_P428742
A_51_P143200
A_55_P2137023
A_55_P2169963
A_55_P1996973
A_55_P1957353
A_55_P2148001
A_55_P2137527
A_55_P2013569
A_51_P505662
A_55_P1960936
A_55_P2155479
A_52_P239787
A_55_P2043657
A_55_P2045050
A_55_P1954092
A_55_P2130834
A_55_P1962946
A_55_P2097219
A_51_P322123
A_55_P2154719
A_66_P103511
A_55_P1996911
A_55_P2074085
A_55_P1995623
A_55_P2037081
A_52_P14526
A_66_P132446
A_52_P1076124
A_51_P416613
A_55_P2237129
A_55_P2334629
A_55_P2240468
A_55_P2067777
A_52_P323658
A_55_P2045792
A_55_P2040777
A_55_P1976067
A_55_P2064538
A_55_P2255737
A_55_P1957213
A_52_P668984
A_55_P2088720
A_51_P505521
A_51_P487690
A_51_P229655
A_55_P1954724
A_55_P2065726
A_55_P2054643
A_51_P108190
A_55_P2140212
A_55_P2029746
A_52_P730743
A_55_P2089118
A_55_P1993851
A_55_P2175955
A_55_P1973347
A_55_P2010097
A_55_P2010093
A_52_P700056
A_55_P1961499
A_51_P343517
A_55_P1977473
A_52_P559919
A_51_P104933
A_51_P172752
A_51_P108659
A_51_P271984
A_55_P2039110
A_55_P2116650
A_55_P2033326
A_55_P2103703
A_55_P1971963
A_51_P425824
A_55_P2171413
A_55_P2009952

## Sheet: Blbc Coding Wk2
Table S1. LncRNA and mRNA mammary tissue expression signatures of strain differences and after LDIR.
Up	Down
A_51_P117087	A_51_P119358
A_51_P121607	A_51_P126337
A_51_P124126	A_51_P150653
A_51_P125056	A_51_P163578
A_51_P126275	A_51_P168630
A_51_P137452	A_51_P204252
A_51_P148478	A_51_P234847
A_51_P162083	A_51_P258690
A_51_P167597	A_51_P263953
A_51_P167876	A_51_P271136
A_51_P186899	A_51_P298615
A_51_P192203	A_51_P308347
A_51_P193189	A_51_P351970
A_51_P203844	A_51_P363214
A_51_P205334	A_51_P374726
A_51_P206165	A_51_P374991
A_51_P206235	A_51_P380919
A_51_P210732	A_51_P392303
A_51_P223724	A_51_P404139
A_51_P226962	A_51_P426270
A_51_P230537	A_51_P444437
A_51_P230552	A_52_P1027170
A_51_P237585	A_52_P1180358
A_51_P249104	A_52_P172014
A_51_P257841	A_52_P236398
A_51_P266733	A_52_P237077
A_51_P273157	A_52_P276955
A_51_P278230	A_52_P284958
A_51_P288295	A_52_P330359
A_51_P288541	A_52_P37702
A_51_P303316	A_52_P387884
A_51_P308912	A_52_P404341
A_51_P324473	A_52_P416327
A_51_P327996	A_52_P421716
A_51_P348217	A_52_P422494
A_51_P353735	A_52_P462657
A_51_P364210	A_52_P500979
A_51_P378336	A_52_P53019
A_51_P378903	A_52_P589568
A_51_P379698	A_52_P597791
A_51_P384306	A_52_P70854
A_51_P386270	A_52_P98614
A_51_P391934	A_55_P1954086
A_51_P391955	A_55_P1957148
A_51_P398833	A_55_P1962851
A_51_P405638	A_55_P1963547
A_51_P412966	A_55_P1964327
A_51_P414746	A_55_P1965659
A_51_P416669	A_55_P1965886
A_51_P419103	A_55_P1972297
A_51_P433887	A_55_P1975655
A_51_P436521	A_55_P1982019
A_51_P442118	A_55_P1985905
A_51_P442964	A_55_P1985978
A_51_P455326	A_55_P1986169
A_51_P459944	A_55_P1988907
A_51_P498442	A_55_P1997225
A_51_P520306	A_55_P2000027
A_52_P1004616	A_55_P2001474
A_52_P106285	A_55_P2001628
A_52_P112591	A_55_P2001818
A_52_P114962	A_55_P2003703
A_52_P117408	A_55_P2004536
A_52_P121015	A_55_P2006668
A_52_P122649	A_55_P2006862
A_52_P142520	A_55_P2007500
A_52_P144037	A_55_P2008016
A_52_P1516	A_55_P2008214
A_52_P168575	A_55_P2013336
A_52_P209514	A_55_P2015530
A_52_P210909	A_55_P2018116
A_52_P21951	A_55_P2018681
A_52_P229981	A_55_P2019841
A_52_P24439	A_55_P2020612
A_52_P288251	A_55_P2028832
A_52_P30641	A_55_P2039537
A_52_P339742	A_55_P2044292
A_52_P356128	A_55_P2044932
A_52_P363843	A_55_P2053788
A_52_P397957	A_55_P2057528
A_52_P404942	A_55_P2058117
A_52_P480859	A_55_P2061333
A_52_P487436	A_55_P2065601
A_52_P496173	A_55_P2067620
A_52_P517098	A_55_P2070539
A_52_P517289	A_55_P2078695
A_52_P52910	A_55_P2078780
A_52_P551844	A_55_P2079425
A_52_P594302	A_55_P2082796
A_52_P599573	A_55_P2084348
A_52_P607195	A_55_P2086240
A_52_P612251	A_55_P2088183
A_52_P613808	A_55_P2088223
A_52_P61697	A_55_P2089500
A_52_P628915	A_55_P2090280
A_52_P659270	A_55_P2091032
A_52_P661044	A_55_P2092164
A_52_P662711	A_55_P2093039
A_52_P684087	A_55_P2093774
A_52_P70796	A_55_P2094632
A_52_P78022	A_55_P2096932
A_55_P1952469	A_55_P2100809
A_55_P1954452	A_55_P2104924
A_55_P1954856	A_55_P2105963
A_55_P1957866	A_55_P2109534
A_55_P1959122	A_55_P2110327
A_55_P1959384	A_55_P2110584
A_55_P1961180	A_55_P2113021
A_55_P1964138	A_55_P2125223
A_55_P1966216	A_55_P2126590
A_55_P1966254	A_55_P2127015
A_55_P1967473	A_55_P2129281
A_55_P1968603	A_55_P2130880
A_55_P1968683	A_55_P2131300
A_55_P1968808	A_55_P2132059
A_55_P1969152	A_55_P2132128
A_55_P1969231	A_55_P2134236
A_55_P1969949	A_55_P2135526
A_55_P1970915	A_55_P2136526
A_55_P1971571	A_55_P2141817
A_55_P1971938	A_55_P2142928
A_55_P1973203	A_55_P2149450
A_55_P1973326	A_55_P2152896
A_55_P1974178	A_55_P2155307
A_55_P1974760	A_55_P2156022
A_55_P1976387	A_55_P2157978
A_55_P1976903	A_55_P2158011
A_55_P1977052	A_55_P2160181
A_55_P1977451	A_55_P2164348
A_55_P1977776	A_55_P2164608
A_55_P1978920	A_55_P2167537
A_55_P1979156	A_55_P2171791
A_55_P1979364	A_55_P2174661
A_55_P1980550	A_55_P2178991
A_55_P1981035	A_55_P2179027
A_55_P1982467	A_55_P2201454
A_55_P1982991	A_55_P2205769
A_55_P1984821	A_55_P2220748
A_55_P1985628	A_55_P2249344
A_55_P1986183	A_55_P2252876
A_55_P1986401	A_55_P2284119
A_55_P1986888	A_55_P2321979
A_55_P1987117	A_55_P2322104
A_55_P1987406	A_55_P2328082
A_55_P1987800	A_55_P2338598
A_55_P1988658	A_55_P2378030
A_55_P1988774	A_55_P2388762
A_55_P1989225	A_55_P2406977
A_55_P1989449	A_55_P2407222
A_55_P1989738	A_55_P2411821
A_55_P1990032	A_55_P2422383
A_55_P1990483	A_65_P20433
A_55_P1994688	A_66_P101620
A_55_P1997421	A_66_P105460
A_55_P1997676	A_66_P110707
A_55_P1997903	A_66_P132491
A_55_P1999187	A_66_P136354
A_55_P2000978	A_66_P137374
A_55_P2001583
A_55_P2002469
A_55_P2003004
A_55_P2003883
A_55_P2004365
A_55_P2005175
A_55_P2006460
A_55_P2008403
A_55_P2008644
A_55_P2008801
A_55_P2012071
A_55_P2012314
A_55_P2014853
A_55_P2014854
A_55_P2015635
A_55_P2017377
A_55_P2017465
A_55_P2021699
A_55_P2021816
A_55_P2022258
A_55_P2024439
A_55_P2025173
A_55_P2025328
A_55_P2025443
A_55_P2026880
A_55_P2028130
A_55_P2029031
A_55_P2029581
A_55_P2031068
A_55_P2031333
A_55_P2031681
A_55_P2032009
A_55_P2032548
A_55_P2033116
A_55_P2034385
A_55_P2038347
A_55_P2040292
A_55_P2041137
A_55_P2042177
A_55_P2042183
A_55_P2044257
A_55_P2044528
A_55_P2045040
A_55_P2045697
A_55_P2046074
A_55_P2048550
A_55_P2050962
A_55_P2051377
A_55_P2052465
A_55_P2053404
A_55_P2056443
A_55_P2057430
A_55_P2057557
A_55_P2057642
A_55_P2058023
A_55_P2058040
A_55_P2060193
A_55_P2062021
A_55_P2062513
A_55_P2062612
A_55_P2063486
A_55_P2067717
A_55_P2069891
A_55_P2071142
A_55_P2072041
A_55_P2074165
A_55_P2075253
A_55_P2075962
A_55_P2079527
A_55_P2081198
A_55_P2081761
A_55_P2082880
A_55_P2083304
A_55_P2083317
A_55_P2083963
A_55_P2084152
A_55_P2084606
A_55_P2087153
A_55_P2088755
A_55_P2088846
A_55_P2089665
A_55_P2089858
A_55_P2090299
A_55_P2091616
A_55_P2093749
A_55_P2094044
A_55_P2095558
A_55_P2096035
A_55_P2096973
A_55_P2097333
A_55_P2098340
A_55_P2098782
A_55_P2098971
A_55_P2100272
A_55_P2100290
A_55_P2101088
A_55_P2101957
A_55_P2102991
A_55_P2103992
A_55_P2104343
A_55_P2104997
A_55_P2105195
A_55_P2105239
A_55_P2105452
A_55_P2106414
A_55_P2107681
A_55_P2108813
A_55_P2109008
A_55_P2109927
A_55_P2110210
A_55_P2111322
A_55_P2111603
A_55_P2111698
A_55_P2112564
A_55_P2113335
A_55_P2117146
A_55_P2117475
A_55_P2118552
A_55_P2118843
A_55_P2121484
A_55_P2121794
A_55_P2121985
A_55_P2123045
A_55_P2124582
A_55_P2125791
A_55_P2127194
A_55_P2127755
A_55_P2130114
A_55_P2131747
A_55_P2131979
A_55_P2133431
A_55_P2133767
A_55_P2134336
A_55_P2135203
A_55_P2137073
A_55_P2139668
A_55_P2140764
A_55_P2141043
A_55_P2141454
A_55_P2143085
A_55_P2143296
A_55_P2144256
A_55_P2144511
A_55_P2145626
A_55_P2146398
A_55_P2147547
A_55_P2148828
A_55_P2150580
A_55_P2150937
A_55_P2151421
A_55_P2152292
A_55_P2152991
A_55_P2153961
A_55_P2156993
A_55_P2157384
A_55_P2159155
A_55_P2160663
A_55_P2162175
A_55_P2162815
A_55_P2164492
A_55_P2164890
A_55_P2164932
A_55_P2166733
A_55_P2167630
A_55_P2170464
A_55_P2172106
A_55_P2172693
A_55_P2174386
A_55_P2175440
A_55_P2175585
A_55_P2176898
A_55_P2178568
A_55_P2179348
A_55_P2181796
A_55_P2182523
A_55_P2184023
A_55_P2184209
A_55_P2184511
A_55_P2185410
A_55_P2187030
A_55_P2193487
A_55_P2200870
A_55_P2201612
A_55_P2202598
A_55_P2207110
A_55_P2208682
A_55_P2214124
A_55_P2236291
A_55_P2243237
A_55_P2244941
A_55_P2247021
A_55_P2250391
A_55_P2267696
A_55_P2273929
A_55_P2287260
A_55_P2294051
A_55_P2305010
A_55_P2318016
A_55_P2329660
A_55_P2330173
A_55_P2335878
A_55_P2340820
A_55_P2361731
A_55_P2367878
A_55_P2377436
A_55_P2401624
A_55_P2419116
A_55_P2421222
A_55_P2421597
A_55_P2431897
A_55_P2472184
A_65_P13209
A_66_P100496
A_66_P100840
A_66_P114616
A_66_P114705
A_66_P114826
A_66_P119812
A_66_P120970
A_66_P121193
A_66_P123836
A_66_P124975
A_66_P125538
A_66_P129619
A_66_P130541
A_66_P133119
A_66_P133225
A_66_P135885
A_66_P136032
A_66_P136569
A_66_P138053
A_66_P139675
A_66_P140525
A_66_P140954

## Sheet: Blbc Coding Wk4
Table S1. LncRNA and mRNA mammary tissue expression signatures of strain differences and after LDIR.
Up	Down
A_51_P111962	A_51_P114462
A_51_P119358	A_51_P117477
A_51_P121031	A_51_P118132
A_51_P132013	A_51_P133097
A_51_P137742	A_51_P144319
A_51_P139716	A_51_P146044
A_51_P143200	A_51_P150120
A_51_P147274	A_51_P157802
A_51_P149714	A_51_P170463
A_51_P150678	A_51_P176086
A_51_P154485	A_51_P185627
A_51_P154842	A_51_P189814
A_51_P161021	A_51_P193173
A_51_P162144	A_51_P196590
A_51_P169445	A_51_P199168
A_51_P169745	A_51_P200610
A_51_P171936	A_51_P215559
A_51_P173114	A_51_P230287
A_51_P175667	A_51_P230439
A_51_P179504	A_51_P233928
A_51_P186476	A_51_P253263
A_51_P193146	A_51_P256224
A_51_P194503	A_51_P263246
A_51_P201581	A_51_P264548
A_51_P208160	A_51_P266077
A_51_P209280	A_51_P269084
A_51_P225224	A_51_P270904
A_51_P227222	A_51_P272553
A_51_P232649	A_51_P275697
A_51_P232748	A_51_P276802
A_51_P235687	A_51_P288916
A_51_P238009	A_51_P290207
A_51_P241457	A_51_P293339
A_51_P241645	A_51_P309988
A_51_P246066	A_51_P317505
A_51_P261517	A_51_P324633
A_51_P262515	A_51_P330353
A_51_P265495	A_51_P337918
A_51_P265571	A_51_P344008
A_51_P275454	A_51_P352381
A_51_P282557	A_51_P355829
A_51_P284526	A_51_P362176
A_51_P288876	A_51_P365318
A_51_P295085	A_51_P368394
A_51_P298837	A_51_P368870
A_51_P304170	A_51_P379083
A_51_P309556	A_51_P406429
A_51_P321600	A_51_P413111
A_51_P324535	A_51_P413216
A_51_P324742	A_51_P424959
A_51_P327657	A_51_P428483
A_51_P334063	A_51_P435489
A_51_P334942	A_51_P461191
A_51_P337675	A_51_P461504
A_51_P351860	A_51_P470715
A_51_P354224	A_51_P479808
A_51_P359570	A_51_P492897
A_51_P364210	A_51_P494125
A_51_P364871	A_52_P1011
A_51_P371279	A_52_P1042732
A_51_P372393	A_52_P105765
A_51_P380309	A_52_P116134
A_51_P380699	A_52_P14444
A_51_P382407	A_52_P151934
A_51_P385803	A_52_P15674
A_51_P387123	A_52_P193161
A_51_P401501	A_52_P200610
A_51_P405476	A_52_P205797
A_51_P408363	A_52_P20765
A_51_P410205	A_52_P227267
A_51_P410772	A_52_P235995
A_51_P420321	A_52_P237232
A_51_P421876	A_52_P256279
A_51_P422625	A_52_P283501
A_51_P430766	A_52_P28960
A_51_P431543	A_52_P322421
A_51_P432950	A_52_P338796
A_51_P437978	A_52_P350344
A_51_P441426	A_52_P35377
A_51_P447614	A_52_P360515
A_51_P448971	A_52_P374983
A_51_P455338	A_52_P378968
A_51_P456721	A_52_P387009
A_51_P460954	A_52_P423247
A_51_P461779	A_52_P425004
A_51_P464703	A_52_P435561
A_51_P465350	A_52_P460836
A_51_P468260	A_52_P467488
A_51_P472867	A_52_P467519
A_51_P483511	A_52_P468683
A_51_P483544	A_52_P480266
A_51_P485405	A_52_P491569
A_51_P486719	A_52_P508974
A_51_P487690	A_52_P590625
A_51_P497724	A_52_P604629
A_51_P499838	A_52_P644114
A_51_P505914	A_52_P89335
A_51_P511151	A_52_P920158
A_51_P513568	A_52_P932421
A_51_P516870	A_52_P97889
A_51_P517695	A_55_P1952182
A_52_P130639	A_55_P1953038
A_52_P156734	A_55_P1955701
A_52_P157837	A_55_P1957618
A_52_P161237	A_55_P1957700
A_52_P167382	A_55_P1960916
A_52_P177271	A_55_P1961760
A_52_P18236	A_55_P1963553
A_52_P186937	A_55_P1966690
A_52_P208416	A_55_P1968325
A_52_P219230	A_55_P1968963
A_52_P221588	A_55_P1970105
A_52_P223809	A_55_P1970494
A_52_P22617	A_55_P1971154
A_52_P231075	A_55_P1972710
A_52_P258617	A_55_P1973011
A_52_P267717	A_55_P1973264
A_52_P300445	A_55_P1977533
A_52_P31510	A_55_P1978028
A_52_P31641	A_55_P1979814
A_52_P320261	A_55_P1980292
A_52_P330111	A_55_P1984878
A_52_P333063	A_55_P1985788
A_52_P337388	A_55_P1986823
A_52_P345261	A_55_P1989683
A_52_P356204	A_55_P1989728
A_52_P380369	A_55_P1989813
A_52_P380710	A_55_P1991164
A_52_P385736	A_55_P1996893
A_52_P388836	A_55_P1997465
A_52_P393738	A_55_P1998066
A_52_P402786	A_55_P1998339
A_52_P408757	A_55_P1998882
A_52_P412585	A_55_P1999800
A_52_P42069	A_55_P2000201
A_52_P425890	A_55_P2001486
A_52_P462949	A_55_P2005873
A_52_P463518	A_55_P2006604
A_52_P464228	A_55_P2006808
A_52_P465946	A_55_P2006842
A_52_P469789	A_55_P2007500
A_52_P47126	A_55_P2009905
A_52_P493477	A_55_P2011635
A_52_P494564	A_55_P2012627
A_52_P512427	A_55_P2016459
A_52_P517204	A_55_P2017689
A_52_P520607	A_55_P2017739
A_52_P526513	A_55_P2022123
A_52_P527625	A_55_P2022629
A_52_P528240	A_55_P2027852
A_52_P541161	A_55_P2028305
A_52_P572178	A_55_P2030160
A_52_P577748	A_55_P2030647
A_52_P602669	A_55_P2030899
A_52_P607128	A_55_P2031611
A_52_P615247	A_55_P2035852
A_52_P616356	A_55_P2036220
A_52_P623226	A_55_P2036932
A_52_P628212	A_55_P2039038
A_52_P679860	A_55_P2042878
A_52_P796840	A_55_P2046493
A_55_P1952598	A_55_P2049238
A_55_P1952618	A_55_P2049261
A_55_P1952900	A_55_P2050169
A_55_P1952935	A_55_P2051965
A_55_P1953823	A_55_P2052380
A_55_P1953836	A_55_P2055742
A_55_P1954648	A_55_P2055920
A_55_P1954658	A_55_P2058117
A_55_P1955103	A_55_P2060318
A_55_P1955315	A_55_P2065909
A_55_P1956652	A_55_P2069579
A_55_P1957173	A_55_P2069806
A_55_P1957353	A_55_P2070641
A_55_P1958215	A_55_P2070766
A_55_P1958712	A_55_P2071354
A_55_P1959218	A_55_P2071581
A_55_P1959891	A_55_P2072551
A_55_P1960246	A_55_P2073248
A_55_P1960376	A_55_P2076692
A_55_P1960416	A_55_P2077153
A_55_P1961943	A_55_P2077988
A_55_P1962305	A_55_P2081388
A_55_P1962766	A_55_P2082215
A_55_P1962791	A_55_P2084890
A_55_P1962918	A_55_P2088251
A_55_P1963154	A_55_P2089565
A_55_P1963606	A_55_P2089577
A_55_P1963920	A_55_P2091858
A_55_P1965363	A_55_P2101920
A_55_P1965432	A_55_P2103541
A_55_P1966070	A_55_P2109857
A_55_P1966450	A_55_P2111163
A_55_P1966731	A_55_P2111985
A_55_P1966755	A_55_P2112484
A_55_P1969610	A_55_P2113375
A_55_P1970349	A_55_P2113653
A_55_P1971010	A_55_P2114118
A_55_P1973417	A_55_P2114651
A_55_P1974577	A_55_P2115906
A_55_P1974751	A_55_P2116593
A_55_P1975166	A_55_P2119917
A_55_P1976212	A_55_P2121608
A_55_P1976714	A_55_P2121613
A_55_P1976743	A_55_P2123123
A_55_P1976913	A_55_P2126281
A_55_P1976949	A_55_P2126632
A_55_P1977042	A_55_P2129077
A_55_P1977473	A_55_P2134591
A_55_P1977929	A_55_P2138159
A_55_P1979753	A_55_P2140338
A_55_P1980242	A_55_P2143081
A_55_P1980486	A_55_P2143601
A_55_P1981167	A_55_P2145531
A_55_P1981195	A_55_P2146577
A_55_P1981197	A_55_P2147956
A_55_P1981479	A_55_P2148056
A_55_P1982147	A_55_P2149337
A_55_P1982394	A_55_P2150389
A_55_P1984243	A_55_P2154994
A_55_P1984607	A_55_P2156993
A_55_P1985689	A_55_P2159875
A_55_P1986883	A_55_P2161923
A_55_P1986907	A_55_P2162935
A_55_P1987117	A_55_P2166622
A_55_P1987151	A_55_P2166799
A_55_P1987226	A_55_P2172058
A_55_P1987610	A_55_P2176150
A_55_P1988108	A_55_P2178818
A_55_P1988202	A_55_P2180445
A_55_P1988310	A_55_P2190152
A_55_P1990535	A_55_P2194958
A_55_P1990633	A_55_P2196408
A_55_P1990840	A_55_P2200780
A_55_P1991812	A_55_P2206269
A_55_P1992530	A_55_P2207342
A_55_P1993358	A_55_P2211937
A_55_P1994042	A_55_P2215580
A_55_P1994569	A_55_P2240919
A_55_P1994862	A_55_P2241553
A_55_P1995104	A_55_P2249136
A_55_P1995337	A_55_P2256586
A_55_P1996746	A_55_P2271058
A_55_P1997126	A_55_P2280868
A_55_P1997525	A_55_P2305420
A_55_P1997534	A_55_P2316612
A_55_P1997569	A_55_P2329313
A_55_P1998416	A_55_P2329487
A_55_P1998843	A_55_P2332926
A_55_P1998942	A_55_P2347529
A_55_P1998943	A_55_P2349243
A_55_P1999162	A_55_P2365902
A_55_P2000688	A_55_P2375121
A_55_P2001223	A_55_P2375905
A_55_P2001489	A_55_P2381429
A_55_P2001876	A_55_P2383128
A_55_P2002727	A_55_P2391000
A_55_P2003414	A_55_P2392485
A_55_P2003497	A_55_P2406758
A_55_P2003638	A_55_P2416494
A_55_P2004786	A_55_P2425761
A_55_P2005512	A_55_P2455460
A_55_P2005977	A_55_P2471029
A_55_P2006008	A_65_P01643
A_55_P2006240	A_65_P05252
A_55_P2007155	A_65_P07827
A_55_P2007368	A_65_P17869
A_55_P2007646	A_66_P109941
A_55_P2007816	A_66_P115004
A_55_P2008740	A_66_P116657
A_55_P2009395	A_66_P121782
A_55_P2009940	A_66_P123980
A_55_P2010292	A_66_P131433
A_55_P2010301	A_66_P132550
A_55_P2012101	A_66_P136193
A_55_P2012216	A_66_P138072
A_55_P2012246	A_66_P138646
A_55_P2012261	A_66_P139493
A_55_P2012293
A_55_P2012702
A_55_P2013038
A_55_P2015687
A_55_P2016471
A_55_P2017759
A_55_P2017914
A_55_P2018904
A_55_P2018934
A_55_P2018964
A_55_P2019601
A_55_P2019813
A_55_P2019969
A_55_P2020477
A_55_P2022631
A_55_P2024054
A_55_P2024106
A_55_P2024125
A_55_P2024888
A_55_P2025891
A_55_P2025937
A_55_P2026019
A_55_P2026139
A_55_P2026223
A_55_P2026458
A_55_P2026460
A_55_P2026632
A_55_P2026898
A_55_P2027708
A_55_P2028214
A_55_P2028542
A_55_P2028853
A_55_P2029046
A_55_P2030229
A_55_P2032009
A_55_P2032167
A_55_P2032355
A_55_P2033366
A_55_P2034320
A_55_P2034507
A_55_P2034938
A_55_P2035509
A_55_P2038262
A_55_P2039541
A_55_P2039684
A_55_P2040081
A_55_P2041976
A_55_P2042606
A_55_P2042988
A_55_P2043367
A_55_P2044922
A_55_P2045136
A_55_P2046709
A_55_P2046959
A_55_P2047480
A_55_P2047753
A_55_P2047768
A_55_P2048550
A_55_P2048912
A_55_P2049944
A_55_P2050360
A_55_P2050722
A_55_P2050932
A_55_P2051476
A_55_P2052913
A_55_P2053309
A_55_P2053404
A_55_P2054280
A_55_P2054445
A_55_P2055708
A_55_P2055834
A_55_P2056443
A_55_P2056719
A_55_P2056744
A_55_P2056789
A_55_P2056861
A_55_P2057076
A_55_P2057489
A_55_P2057494
A_55_P2058092
A_55_P2061025
A_55_P2061914
A_55_P2062774
A_55_P2063376
A_55_P2063654
A_55_P2063755
A_55_P2064523
A_55_P2064702
A_55_P2065494
A_55_P2066230
A_55_P2066578
A_55_P2066727
A_55_P2066976
A_55_P2067425
A_55_P2067747
A_55_P2067787
A_55_P2067971
A_55_P2068461
A_55_P2068501
A_55_P2070492
A_55_P2071142
A_55_P2071656
A_55_P2071940
A_55_P2072666
A_55_P2075127
A_55_P2075220
A_55_P2075874
A_55_P2076041
A_55_P2076891
A_55_P2079291
A_55_P2080074
A_55_P2080799
A_55_P2081432
A_55_P2081785
A_55_P2082319
A_55_P2082854
A_55_P2083186
A_55_P2084606
A_55_P2085060
A_55_P2085586
A_55_P2086279
A_55_P2086381
A_55_P2086433
A_55_P2087448
A_55_P2088945
A_55_P2089233
A_55_P2089804
A_55_P2091032
A_55_P2092791
A_55_P2093665
A_55_P2094337
A_55_P2094489
A_55_P2095311
A_55_P2100060
A_55_P2100133
A_55_P2100194
A_55_P2100237
A_55_P2101108
A_55_P2102881
A_55_P2103225
A_55_P2103249
A_55_P2103937
A_55_P2104363
A_55_P2106068
A_55_P2106454
A_55_P2107140
A_55_P2107352
A_55_P2107437
A_55_P2107577
A_55_P2107632
A_55_P2107775
A_55_P2108521
A_55_P2109407
A_55_P2111668
A_55_P2111698
A_55_P2112787
A_55_P2113330
A_55_P2113857
A_55_P2114308
A_55_P2114953
A_55_P2115057
A_55_P2115198
A_55_P2115401
A_55_P2115623
A_55_P2116674
A_55_P2117614
A_55_P2117656
A_55_P2118537
A_55_P2118586
A_55_P2119287
A_55_P2120232
A_55_P2120968
A_55_P2121623
A_55_P2122604
A_55_P2122605
A_55_P2122653
A_55_P2122856
A_55_P2122884
A_55_P2122896
A_55_P2123283
A_55_P2123519
A_55_P2123939
A_55_P2126207
A_55_P2126502
A_55_P2127112
A_55_P2127215
A_55_P2127385
A_55_P2127854
A_55_P2128853
A_55_P2128869
A_55_P2129047
A_55_P2129514
A_55_P2129999
A_55_P2130834
A_55_P2130925
A_55_P2131667
A_55_P2131742
A_55_P2131920
A_55_P2132128
A_55_P2132549
A_55_P2133907
A_55_P2134715
A_55_P2135017
A_55_P2136036
A_55_P2138217
A_55_P2139356
A_55_P2139426
A_55_P2141004
A_55_P2141053
A_55_P2142650
A_55_P2143105
A_55_P2144701
A_55_P2146743
A_55_P2147245
A_55_P2149083
A_55_P2149450
A_55_P2149641
A_55_P2149670
A_55_P2150113
A_55_P2150392
A_55_P2151006
A_55_P2151601
A_55_P2151991
A_55_P2152164
A_55_P2152369
A_55_P2152472
A_55_P2152699
A_55_P2153331
A_55_P2154809
A_55_P2154933
A_55_P2155843
A_55_P2155876
A_55_P2156006
A_55_P2156776
A_55_P2157008
A_55_P2157532
A_55_P2158058
A_55_P2158251
A_55_P2159294
A_55_P2159315
A_55_P2159969
A_55_P2161214
A_55_P2161794
A_55_P2162792
A_55_P2162807
A_55_P2163348
A_55_P2166708
A_55_P2166960
A_55_P2167645
A_55_P2167728
A_55_P2168254
A_55_P2168458
A_55_P2169569
A_55_P2169659
A_55_P2169669
A_55_P2169779
A_55_P2170539
A_55_P2172663
A_55_P2173011
A_55_P2173210
A_55_P2174633
A_55_P2174661
A_55_P2176332
A_55_P2177073
A_55_P2177463
A_55_P2177633
A_55_P2179309
A_55_P2179676
A_55_P2180091
A_55_P2181397
A_55_P2181738
A_55_P2182955
A_55_P2184013
A_55_P2185605
A_55_P2185875
A_55_P2186220
A_55_P2186802
A_55_P2187211
A_55_P2187954
A_55_P2196180
A_55_P2199202
A_55_P2208961
A_55_P2213418
A_55_P2214580
A_55_P2217851
A_55_P2227355
A_55_P2229791
A_55_P2237618
A_55_P2244971
A_55_P2256019
A_55_P2259964
A_55_P2270907
A_55_P2280811
A_55_P2291185
A_55_P2297177
A_55_P2299737
A_55_P2321503
A_55_P2329298
A_55_P2337073
A_55_P2342696
A_55_P2367350
A_55_P2378030
A_55_P2380428
A_55_P2381921
A_55_P2404479
A_55_P2415417
A_65_P08507
A_65_P17218
A_65_P18756
A_66_P100165
A_66_P100496
A_66_P101366
A_66_P101903
A_66_P103894
A_66_P104119
A_66_P104661
A_66_P105350
A_66_P105689
A_66_P106388
A_66_P107484
A_66_P108088
A_66_P108214
A_66_P110167
A_66_P110633
A_66_P110741
A_66_P110750
A_66_P112641
A_66_P113008
A_66_P113708
A_66_P114782
A_66_P116683
A_66_P118059
A_66_P118091
A_66_P119968
A_66_P120970
A_66_P121086
A_66_P121787
A_66_P122086
A_66_P122211
A_66_P123357
A_66_P126877
A_66_P127463
A_66_P129763
A_66_P130024
A_66_P130840
A_66_P130853
A_66_P132295
A_66_P135452
A_66_P136064
A_66_P136095
A_66_P138406
A_66_P138662
A_66_P139675
ERCC-00123_60
ERCC-00165_60

## Sheet: Blbc Coding Wk8
Table S1. LncRNA and mRNA mammary tissue expression signatures of strain differences and after LDIR.
Up	Down
A_51_P153683	A_51_P113195
A_51_P168613	A_51_P114817
A_51_P176583	A_51_P119358
A_51_P198675	A_51_P131119
A_51_P239654	A_51_P131216
A_51_P258768	A_51_P137452
A_51_P288341	A_51_P149267
A_51_P375201	A_51_P160581
A_51_P428483	A_51_P161636
A_52_P128134	A_51_P170807
A_52_P213207	A_51_P173678
A_52_P311148	A_51_P185660
A_52_P31543	A_51_P189082
A_52_P326664	A_51_P193813
A_52_P460836	A_51_P201308
A_52_P598605	A_51_P205524
A_52_P876147	A_51_P213476
A_55_P1953003	A_51_P215190
A_55_P1962551	A_51_P225484
A_55_P1977431	A_51_P263719
A_55_P1988043	A_51_P269404
A_55_P1993168	A_51_P278653
A_55_P1998086	A_51_P315144
A_55_P2019683	A_51_P316199
A_55_P2021505	A_51_P320022
A_55_P2027152	A_51_P328631
A_55_P2029289	A_51_P336599
A_55_P2037081	A_51_P339564
A_55_P2040921	A_51_P349888
A_55_P2042813	A_51_P366680
A_55_P2045871	A_51_P372743
A_55_P2052939	A_51_P376445
A_55_P2054027	A_51_P379552
A_55_P2062171	A_51_P398089
A_55_P2091274	A_51_P410205
A_55_P2095727	A_51_P414208
A_55_P2096435	A_51_P435629
A_55_P2111790	A_51_P435817
A_55_P2113051	A_51_P435844
A_55_P2119683	A_51_P438781
A_55_P2131328	A_51_P447189
A_55_P2136880	A_51_P462271
A_55_P2138933	A_51_P475816
A_55_P2153461	A_51_P497768
A_55_P2153740	A_51_P500949
A_55_P2162825	A_51_P501773
A_55_P2169227	A_51_P504735
A_55_P2369048	A_51_P505967
A_55_P2393543	A_51_P516198
A_66_P122621	A_52_P1044655
	A_52_P1124229
	A_52_P125485
	A_52_P188856
	A_52_P203560
	A_52_P217796
	A_52_P219089
	A_52_P21951
	A_52_P258557
	A_52_P295140
	A_52_P313185
	A_52_P322474
	A_52_P349694
	A_52_P379474
	A_52_P385736
	A_52_P425839
	A_52_P468068
	A_52_P482897
	A_52_P527260
	A_52_P576188
	A_52_P591310
	A_52_P598835
	A_52_P61520
	A_52_P618009
	A_52_P62444
	A_52_P62833
	A_52_P628411
	A_52_P628915
	A_52_P63855
	A_52_P649817
	A_52_P663413
	A_52_P68087
	A_52_P820196
	A_52_P8459
	A_52_P94021
	A_55_P1952284
	A_55_P1952379
	A_55_P1953107
	A_55_P1954970
	A_55_P1955084
	A_55_P1957294
	A_55_P1957498
	A_55_P1957729
	A_55_P1959650
	A_55_P1960108
	A_55_P1960441
	A_55_P1960896
	A_55_P1961883
	A_55_P1962364
	A_55_P1963011
	A_55_P1964252
	A_55_P1964533
	A_55_P1965248
	A_55_P1965911
	A_55_P1966070
	A_55_P1968099
	A_55_P1968340
	A_55_P1970279
	A_55_P1973588
	A_55_P1975989
	A_55_P1976589
	A_55_P1976972
	A_55_P1977299
	A_55_P1977402
	A_55_P1979126
	A_55_P1979888
	A_55_P1981030
	A_55_P1981455
	A_55_P1984881
	A_55_P1985925
	A_55_P1986169
	A_55_P1986571
	A_55_P1987117
	A_55_P1987151
	A_55_P1987554
	A_55_P1987970
	A_55_P1990200
	A_55_P1990341
	A_55_P1993876
	A_55_P1997135
	A_55_P1998204
	A_55_P1998641
	A_55_P1999756
	A_55_P2000489
	A_55_P2001033
	A_55_P2002787
	A_55_P2003048
	A_55_P2003703
	A_55_P2005525
	A_55_P2006400
	A_55_P2006430
	A_55_P2008141
	A_55_P2008403
	A_55_P2008507
	A_55_P2008795
	A_55_P2009483
	A_55_P2009640
	A_55_P2009767
	A_55_P2011096
	A_55_P2011877
	A_55_P2012281
	A_55_P2012702
	A_55_P2013470
	A_55_P2014511
	A_55_P2015074
	A_55_P2015249
	A_55_P2015541
	A_55_P2017681
	A_55_P2017955
	A_55_P2018407
	A_55_P2021373
	A_55_P2023021
	A_55_P2023285
	A_55_P2025538
	A_55_P2029732
	A_55_P2030465
	A_55_P2030612
	A_55_P2032014
	A_55_P2032553
	A_55_P2032985
	A_55_P2033947
	A_55_P2034091
	A_55_P2036963
	A_55_P2038467
	A_55_P2038643
	A_55_P2040485
	A_55_P2040594
	A_55_P2041444
	A_55_P2042096
	A_55_P2042606
	A_55_P2042688
	A_55_P2042984
	A_55_P2043277
	A_55_P2045750
	A_55_P2048134
	A_55_P2048855
	A_55_P2052655
	A_55_P2054703
	A_55_P2055344
	A_55_P2057726
	A_55_P2057912
	A_55_P2058275
	A_55_P2058761
	A_55_P2059080
	A_55_P2059701
	A_55_P2061025
	A_55_P2064361
	A_55_P2064702
	A_55_P2065815
	A_55_P2067273
	A_55_P2067321
	A_55_P2071112
	A_55_P2071472
	A_55_P2073930
	A_55_P2074425
	A_55_P2076017
	A_55_P2076215
	A_55_P2076219
	A_55_P2076782
	A_55_P2079475
	A_55_P2079669
	A_55_P2079922
	A_55_P2080587
	A_55_P2084621
	A_55_P2084691
	A_55_P2085651
	A_55_P2085989
	A_55_P2086323
	A_55_P2087840
	A_55_P2090577
	A_55_P2091297
	A_55_P2094108
	A_55_P2095663
	A_55_P2096455
	A_55_P2098494
	A_55_P2101108
	A_55_P2103452
	A_55_P2104884
	A_55_P2105296
	A_55_P2105416
	A_55_P2105673
	A_55_P2106039
	A_55_P2106798
	A_55_P2107457
	A_55_P2109312
	A_55_P2110171
	A_55_P2113690
	A_55_P2113758
	A_55_P2114059
	A_55_P2114779
	A_55_P2115300
	A_55_P2116689
	A_55_P2118614
	A_55_P2120968
	A_55_P2124923
	A_55_P2126002
	A_55_P2127482
	A_55_P2128144
	A_55_P2128203
	A_55_P2128582
	A_55_P2130249
	A_55_P2131283
	A_55_P2131452
	A_55_P2131481
	A_55_P2132268
	A_55_P2132873
	A_55_P2133007
	A_55_P2134715
	A_55_P2135178
	A_55_P2135895
	A_55_P2137628
	A_55_P2139216
	A_55_P2141645
	A_55_P2141686
	A_55_P2142321
	A_55_P2142453
	A_55_P2143120
	A_55_P2143499
	A_55_P2147200
	A_55_P2148931
	A_55_P2155116
	A_55_P2155859
	A_55_P2157517
	A_55_P2159315
	A_55_P2160168
	A_55_P2163383
	A_55_P2165210
	A_55_P2166238
	A_55_P2168286
	A_55_P2168511
	A_55_P2176953
	A_55_P2177473
	A_55_P2178036
	A_55_P2179925
	A_55_P2181404
	A_55_P2183508
	A_55_P2185410
	A_55_P2195187
	A_55_P2238933
	A_55_P2243566
	A_55_P2244360
	A_55_P2266285
	A_55_P2269819
	A_55_P2273929
	A_55_P2284273
	A_55_P2285599
	A_55_P2295691
	A_55_P2305623
	A_55_P2305900
	A_55_P2311591
	A_55_P2330069
	A_55_P2330215
	A_55_P2330435
	A_55_P2339399
	A_55_P2341667
	A_55_P2346659
	A_55_P2350710
	A_55_P2353079
	A_55_P2353457
	A_55_P2361932
	A_55_P2362970
	A_55_P2366358
	A_55_P2371879
	A_55_P2380900
	A_55_P2407192
	A_55_P2412847
	A_55_P2416494
	A_55_P2416837
	A_55_P2423518
	A_55_P2427150
	A_55_P2430367
	A_65_P08507
	A_66_P100420
	A_66_P101132
	A_66_P114229
	A_66_P116657
	A_66_P123538
	A_66_P123666
	A_66_P124254
	A_66_P126640
	A_66_P128120
	A_66_P130067
	A_66_P131994
	A_66_P134297
	A_66_P135124
	A_66_P138976
	A_66_P139159
	A_66_P139646
	A_66_P139703
	A_66_P139883

## Sheet: Spr Coding Wk4
Table S1. LncRNA and mRNA mammary tissue expression signatures of strain differences and after LDIR.
Up	Down
A_51_P104172	A_51_P115471
A_51_P118400	A_51_P128320
A_51_P133761	A_51_P153513
A_51_P158814	A_51_P169445
A_51_P162144	A_51_P183561
A_51_P166266	A_51_P217463
A_51_P192139	A_51_P235002
A_51_P212473	A_51_P250001
A_51_P221753	A_51_P262111
A_51_P234847	A_51_P282909
A_51_P243187	A_51_P285856
A_51_P245895	A_51_P298837
A_51_P247496	A_51_P336049
A_51_P270355	A_51_P342773
A_51_P270426	A_51_P347529
A_51_P303749	A_51_P350048
A_51_P316902	A_51_P408974
A_51_P342629	A_51_P409637
A_51_P348792	A_51_P410205
A_51_P367916	A_51_P423825
A_51_P382407	A_51_P432011
A_51_P385928	A_51_P432607
A_51_P394104	A_51_P500541
A_51_P401501	A_51_P501803
A_51_P403728	A_52_P106560
A_51_P404139	A_52_P1087486
A_51_P413216	A_52_P138777
A_51_P426994	A_52_P181679
A_51_P443032	A_52_P214764
A_51_P445211	A_52_P344424
A_51_P493649	A_52_P398998
A_51_P500949	A_52_P40504
A_51_P504314	A_52_P518270
A_51_P504704	A_52_P523712
A_52_P1004616	A_52_P560848
A_52_P139716	A_52_P605556
A_52_P148289	A_52_P770640
A_52_P148952	A_52_P85774
A_52_P201800	A_52_P97572
A_52_P205603	A_55_P1953968
A_52_P211418	A_55_P1954346
A_52_P228005	A_55_P1957238
A_52_P230167	A_55_P1962329
A_52_P240712	A_55_P1965129
A_52_P243054	A_55_P1970131
A_52_P279110	A_55_P1974957
A_52_P299627	A_55_P1980826
A_52_P355169	A_55_P1983944
A_52_P395280	A_55_P1988453
A_52_P463154	A_55_P1988784
A_52_P502226	A_55_P1993353
A_52_P515880	A_55_P1994132
A_52_P520940	A_55_P1996251
A_52_P525725	A_55_P2001793
A_52_P546200	A_55_P2002768
A_52_P55666	A_55_P2004026
A_52_P58359	A_55_P2004526
A_52_P589763	A_55_P2004527
A_52_P599573	A_55_P2007131
A_52_P634122	A_55_P2016882
A_52_P636050	A_55_P2019312
A_52_P644865	A_55_P2019447
A_52_P72965	A_55_P2020981
A_52_P73498	A_55_P2024313
A_52_P7513	A_55_P2026460
A_52_P81231	A_55_P2028004
A_52_P819011	A_55_P2033344
A_52_P84347	A_55_P2042788
A_55_P1952981	A_55_P2046910
A_55_P1952998	A_55_P2053647
A_55_P1953813	A_55_P2059864
A_55_P1954945	A_55_P2071354
A_55_P1956497	A_55_P2073094
A_55_P1959505	A_55_P2075657
A_55_P1960172	A_55_P2080126
A_55_P1962400	A_55_P2082880
A_55_P1966369	A_55_P2083283
A_55_P1969949	A_55_P2088375
A_55_P1971599	A_55_P2088945
A_55_P1973950	A_55_P2099770
A_55_P1977204	A_55_P2100088
A_55_P1977220	A_55_P2116621
A_55_P1977528	A_55_P2119633
A_55_P1978351	A_55_P2122619
A_55_P1979888	A_55_P2123045
A_55_P1981035	A_55_P2125673
A_55_P1982585	A_55_P2125997
A_55_P1983459	A_55_P2129442
A_55_P1986823	A_55_P2130501
A_55_P1987186	A_55_P2133776
A_55_P1987379	A_55_P2134725
A_55_P1990864	A_55_P2137253
A_55_P1991421	A_55_P2140676
A_55_P1994339	A_55_P2141004
A_55_P1994453	A_55_P2151956
A_55_P1994962	A_55_P2152225
A_55_P1995283	A_55_P2158058
A_55_P1995337	A_55_P2163319
A_55_P1996434	A_55_P2163508
A_55_P1996598	A_55_P2164055
A_55_P1996742	A_55_P2164744
A_55_P1997676	A_55_P2175146
A_55_P1998204	A_55_P2182662
A_55_P1999369	A_55_P2186302
A_55_P1999434	A_55_P2193785
A_55_P2000067	A_55_P2200870
A_55_P2000888	A_55_P2290443
A_55_P2001966	A_55_P2294692
A_55_P2003931	A_55_P2305319
A_55_P2005165	A_55_P2307713
A_55_P2006053	A_55_P2328013
A_55_P2006625	A_55_P2340613
A_55_P2007886	A_55_P2353743
A_55_P2011555	A_55_P2361932
A_55_P2013198	A_55_P2372198
A_55_P2014657	A_55_P2399499
A_55_P2014760	A_55_P2401194
A_55_P2016652	A_55_P2420814
A_55_P2016972	A_66_P114571
A_55_P2018841	A_66_P116451
A_55_P2018904	A_66_P132834
A_55_P2021014	A_66_P137374
A_55_P2022173
A_55_P2022743
A_55_P2023329
A_55_P2024095
A_55_P2024282
A_55_P2026238
A_55_P2027895
A_55_P2028517
A_55_P2029446
A_55_P2032449
A_55_P2034491
A_55_P2035824
A_55_P2035882
A_55_P2036095
A_55_P2040485
A_55_P2040534
A_55_P2041549
A_55_P2042183
A_55_P2044257
A_55_P2045966
A_55_P2047877
A_55_P2051400
A_55_P2051476
A_55_P2052136
A_55_P2052166
A_55_P2053142
A_55_P2053978
A_55_P2054315
A_55_P2054703
A_55_P2055055
A_55_P2055920
A_55_P2057168
A_55_P2057856
A_55_P2057881
A_55_P2059283
A_55_P2059732
A_55_P2060269
A_55_P2063508
A_55_P2064180
A_55_P2064955
A_55_P2065325
A_55_P2066444
A_55_P2068501
A_55_P2069781
A_55_P2069915
A_55_P2070331
A_55_P2071176
A_55_P2071566
A_55_P2073208
A_55_P2075333
A_55_P2077623
A_55_P2079535
A_55_P2081101
A_55_P2082489
A_55_P2084263
A_55_P2086750
A_55_P2087013
A_55_P2087345
A_55_P2091651
A_55_P2091931
A_55_P2092441
A_55_P2093624
A_55_P2096324
A_55_P2096797
A_55_P2097264
A_55_P2100725
A_55_P2105321
A_55_P2105413
A_55_P2112419
A_55_P2114651
A_55_P2115131
A_55_P2115270
A_55_P2115315
A_55_P2116310
A_55_P2116593
A_55_P2117055
A_55_P2117506
A_55_P2117950
A_55_P2118552
A_55_P2122856
A_55_P2123496
A_55_P2123912
A_55_P2132010
A_55_P2132831
A_55_P2134172
A_55_P2134336
A_55_P2136348
A_55_P2138235
A_55_P2138966
A_55_P2140286
A_55_P2141167
A_55_P2142064
A_55_P2142404
A_55_P2143601
A_55_P2143622
A_55_P2143991
A_55_P2144586
A_55_P2144745
A_55_P2145136
A_55_P2147956
A_55_P2148333
A_55_P2148746
A_55_P2148748
A_55_P2148821
A_55_P2149585
A_55_P2149630
A_55_P2150349
A_55_P2150352
A_55_P2151591
A_55_P2153331
A_55_P2154005
A_55_P2159875
A_55_P2161397
A_55_P2162122
A_55_P2162970
A_55_P2167249
A_55_P2167818
A_55_P2168271
A_55_P2169544
A_55_P2169989
A_55_P2173626
A_55_P2175296
A_55_P2176076
A_55_P2182389
A_55_P2183837
A_55_P2185068
A_55_P2191303
A_55_P2201831
A_55_P2223502
A_55_P2243277
A_55_P2255146
A_55_P2263277
A_55_P2274423
A_55_P2278775
A_55_P2283207
A_55_P2288983
A_55_P2293013
A_55_P2295282
A_55_P2299637
A_55_P2316682
A_55_P2317575
A_55_P2322961
A_55_P2341358
A_55_P2342537
A_55_P2351024
A_55_P2359110
A_55_P2363902
A_55_P2369534
A_55_P2383083
A_55_P2387515
A_55_P2387665
A_55_P2389518
A_55_P2393543
A_55_P2393558
A_55_P2418824
A_55_P2426799
A_66_P109460
A_66_P109624
A_66_P113325
A_66_P114705
A_66_P114826
A_66_P119757
A_66_P119771
A_66_P121924
A_66_P122719
A_66_P123357
A_66_P125439
A_66_P126640
A_66_P128564
A_66_P129940
A_66_P131137
A_66_P133153
A_66_P134457
A_66_P135061
A_66_P136735
A_66_P137501
A_66_P139233
A_66_P139367
A_66_P139497
A_66_P140856

## Sheet: Blbc Linc Wk2
Table S1. LncRNA and mRNA mammary tissue expression signatures of strain differences and after LDIR.
Up	Down
A_30_P01017522	A_30_P01017449
A_30_P01017533	A_30_P01017487
A_30_P01017704	A_30_P01018191
A_30_P01017734	A_30_P01018207
A_30_P01017766	A_30_P01018236
A_30_P01017800	A_30_P01018362
A_30_P01017815	A_30_P01018412
A_30_P01017854	A_30_P01018522
A_30_P01017907	A_30_P01018838
A_30_P01017935	A_30_P01019515
A_30_P01017970	A_30_P01019900
A_30_P01017995	A_30_P01020408
A_30_P01018024	A_30_P01020515
A_30_P01018105	A_30_P01020655
A_30_P01018126	A_30_P01020691
A_30_P01018275	A_30_P01020806
A_30_P01018283	A_30_P01021009
A_30_P01018536	A_30_P01021060
A_30_P01018545	A_30_P01021064
A_30_P01018712	A_30_P01021156
A_30_P01018774	A_30_P01021159
A_30_P01018855	A_30_P01021413
A_30_P01018912	A_30_P01021468
A_30_P01018984	A_30_P01021504
A_30_P01018997	A_30_P01021652
A_30_P01019002	A_30_P01021708
A_30_P01019021	A_30_P01021749
A_30_P01019040	A_30_P01021804
A_30_P01019171	A_30_P01021817
A_30_P01019249	A_30_P01021829
A_30_P01019318	A_30_P01022291
A_30_P01019340	A_30_P01022355
A_30_P01019373	A_30_P01022471
A_30_P01019564	A_30_P01022554
A_30_P01019579	A_30_P01023080
A_30_P01019691	A_30_P01023200
A_30_P01019778	A_30_P01023837
A_30_P01019875	A_30_P01024101
A_30_P01019893	A_30_P01024236
A_30_P01019964	A_30_P01024660
A_30_P01020000	A_30_P01024820
A_30_P01020037	A_30_P01024944
A_30_P01020097	A_30_P01025063
A_30_P01020126	A_30_P01025073
A_30_P01020232	A_30_P01025227
A_30_P01020339	A_30_P01025275
A_30_P01020378	A_30_P01025381
A_30_P01020389	A_30_P01025844
A_30_P01020416	A_30_P01026066
A_30_P01020417	A_30_P01026715
A_30_P01020470	A_30_P01026729
A_30_P01020486	A_30_P01026753
A_30_P01020747	A_30_P01026793
A_30_P01020756	A_30_P01027318
A_30_P01020786	A_30_P01027453
A_30_P01020799	A_30_P01027509
A_30_P01020870	A_30_P01027625
A_30_P01020891	A_30_P01027629
A_30_P01020919	A_30_P01028062
A_30_P01020928	A_30_P01028476
A_30_P01021068	A_30_P01028563
A_30_P01021118	A_30_P01029129
A_30_P01021121	A_30_P01029478
A_30_P01021163	A_30_P01029574
A_30_P01021286	A_30_P01029592
A_30_P01021407	A_30_P01030180
A_30_P01021408	A_30_P01030389
A_30_P01021466	A_30_P01030851
A_30_P01021494	A_30_P01031115
A_30_P01021501	A_30_P01031266
A_30_P01021549	A_30_P01031546
A_30_P01021580	A_30_P01031603
A_30_P01021628	A_30_P01032107
A_30_P01021661	A_30_P01032342
A_30_P01021967	A_30_P01032402
A_30_P01022080	A_30_P01032439
A_30_P01022117	A_30_P01032488
A_30_P01022255	A_30_P01032834
A_30_P01022260	A_30_P01032970
A_30_P01022504	A_30_P01033015
A_30_P01022533	A_30_P01033103
A_30_P01022664	A_30_P01033106
A_30_P01022677	A_30_P01033184
A_30_P01022780	A_30_P01033192
A_30_P01022819	A_30_P01033370
A_30_P01022882	A_30_P01033393
A_30_P01022901	A_30_P01033638
A_30_P01022937
A_30_P01023050
A_30_P01023158
A_30_P01023176
A_30_P01023185
A_30_P01023203
A_30_P01023242
A_30_P01023287
A_30_P01023332
A_30_P01023391
A_30_P01023407
A_30_P01023431
A_30_P01023435
A_30_P01023560
A_30_P01023565
A_30_P01023705
A_30_P01023780
A_30_P01023838
A_30_P01023854
A_30_P01023988
A_30_P01024135
A_30_P01024157
A_30_P01024242
A_30_P01024249
A_30_P01024313
A_30_P01024458
A_30_P01024475
A_30_P01024556
A_30_P01024585
A_30_P01024601
A_30_P01024614
A_30_P01024622
A_30_P01024635
A_30_P01024690
A_30_P01024693
A_30_P01024710
A_30_P01024713
A_30_P01024763
A_30_P01024797
A_30_P01024830
A_30_P01024926
A_30_P01025062
A_30_P01025069
A_30_P01025088
A_30_P01025100
A_30_P01025166
A_30_P01025176
A_30_P01025199
A_30_P01025226
A_30_P01025398
A_30_P01025436
A_30_P01025605
A_30_P01025656
A_30_P01025709
A_30_P01025788
A_30_P01025791
A_30_P01025840
A_30_P01025884
A_30_P01025972
A_30_P01025976
A_30_P01025990
A_30_P01025998
A_30_P01026093
A_30_P01026235
A_30_P01026264
A_30_P01026334
A_30_P01026348
A_30_P01026378
A_30_P01026438
A_30_P01026563
A_30_P01026772
A_30_P01026816
A_30_P01026827
A_30_P01026832
A_30_P01026892
A_30_P01026960
A_30_P01026990
A_30_P01026994
A_30_P01027005
A_30_P01027298
A_30_P01027459
A_30_P01027595
A_30_P01027622
A_30_P01027673
A_30_P01027793
A_30_P01027799
A_30_P01027810
A_30_P01027853
A_30_P01027922
A_30_P01027997
A_30_P01028022
A_30_P01028127
A_30_P01028172
A_30_P01028214
A_30_P01028341
A_30_P01028390
A_30_P01028478
A_30_P01028498
A_30_P01028516
A_30_P01028564
A_30_P01028656
A_30_P01028694
A_30_P01028767
A_30_P01028771
A_30_P01028982
A_30_P01029000
A_30_P01029025
A_30_P01029103
A_30_P01029116
A_30_P01029130
A_30_P01029275
A_30_P01029334
A_30_P01029344
A_30_P01029352
A_30_P01029361
A_30_P01029394
A_30_P01029466
A_30_P01029496
A_30_P01029591
A_30_P01029841
A_30_P01029854
A_30_P01029858
A_30_P01029902
A_30_P01029904
A_30_P01029960
A_30_P01030035
A_30_P01030050
A_30_P01030097
A_30_P01030103
A_30_P01030122
A_30_P01030130
A_30_P01030158
A_30_P01030248
A_30_P01030275
A_30_P01030418
A_30_P01030449
A_30_P01030462
A_30_P01030477
A_30_P01030482
A_30_P01030499
A_30_P01030551
A_30_P01030562
A_30_P01030601
A_30_P01030632
A_30_P01030688
A_30_P01030759
A_30_P01030836
A_30_P01030848
A_30_P01030880
A_30_P01030957
A_30_P01030975
A_30_P01031063
A_30_P01031083
A_30_P01031106
A_30_P01031281
A_30_P01031582
A_30_P01031640
A_30_P01031646
A_30_P01031885
A_30_P01031909
A_30_P01031947
A_30_P01032157
A_30_P01032191
A_30_P01032240
A_30_P01032413
A_30_P01032465
A_30_P01032520
A_30_P01032523
A_30_P01032540
A_30_P01032849
A_30_P01032881
A_30_P01032907
A_30_P01032937
A_30_P01032954
A_30_P01033017
A_30_P01033087
A_30_P01033172
A_30_P01033388
A_30_P01033395
A_30_P01033397
A_30_P01033454
A_30_P01033500
A_30_P01033542

## Sheet: Blbc Linc Wk4
Table S1. LncRNA and mRNA mammary tissue expression signatures of strain differences and after LDIR.
Up	Down
A_30_P01017482	A_30_P01017472
A_30_P01017510	A_30_P01017739
A_30_P01017536	A_30_P01017965
A_30_P01017567	A_30_P01018031
A_30_P01017593	A_30_P01018083
A_30_P01017652	A_30_P01018502
A_30_P01017759	A_30_P01018735
A_30_P01017768	A_30_P01018936
A_30_P01017772	A_30_P01018962
A_30_P01017842	A_30_P01019037
A_30_P01017882	A_30_P01019238
A_30_P01017891	A_30_P01019406
A_30_P01017898	A_30_P01019535
A_30_P01017970	A_30_P01019596
A_30_P01018034	A_30_P01019706
A_30_P01018145	A_30_P01019709
A_30_P01018174	A_30_P01019915
A_30_P01018191	A_30_P01019985
A_30_P01018384	A_30_P01020025
A_30_P01018470	A_30_P01020071
A_30_P01018521	A_30_P01020131
A_30_P01018748	A_30_P01020152
A_30_P01018789	A_30_P01020231
A_30_P01018815	A_30_P01020465
A_30_P01018824	A_30_P01020568
A_30_P01018835	A_30_P01021244
A_30_P01018854	A_30_P01021593
A_30_P01018941	A_30_P01021642
A_30_P01018997	A_30_P01021768
A_30_P01019002	A_30_P01021799
A_30_P01019027	A_30_P01021943
A_30_P01019129	A_30_P01021956
A_30_P01019156	A_30_P01022168
A_30_P01019163	A_30_P01022310
A_30_P01019199	A_30_P01022417
A_30_P01019244	A_30_P01022571
A_30_P01019276	A_30_P01022631
A_30_P01019348	A_30_P01022695
A_30_P01019373	A_30_P01022965
A_30_P01019433	A_30_P01022994
A_30_P01019469	A_30_P01023398
A_30_P01019561	A_30_P01023480
A_30_P01019570	A_30_P01023489
A_30_P01019576	A_30_P01023572
A_30_P01019629	A_30_P01023579
A_30_P01019663	A_30_P01023620
A_30_P01019782	A_30_P01023711
A_30_P01019807	A_30_P01023736
A_30_P01019842	A_30_P01023776
A_30_P01019892	A_30_P01023790
A_30_P01019936	A_30_P01024363
A_30_P01020046	A_30_P01024434
A_30_P01020059	A_30_P01024458
A_30_P01020473	A_30_P01024478
A_30_P01020503	A_30_P01024482
A_30_P01020569	A_30_P01024606
A_30_P01020624	A_30_P01024692
A_30_P01020652	A_30_P01024744
A_30_P01020678	A_30_P01024945
A_30_P01020682	A_30_P01025066
A_30_P01020683	A_30_P01025161
A_30_P01020753	A_30_P01025399
A_30_P01020784	A_30_P01025522
A_30_P01020851	A_30_P01025604
A_30_P01020866	A_30_P01025657
A_30_P01020919	A_30_P01025818
A_30_P01020985	A_30_P01026041
A_30_P01021011	A_30_P01026287
A_30_P01021030	A_30_P01026345
A_30_P01021048	A_30_P01026370
A_30_P01021057	A_30_P01026388
A_30_P01021182	A_30_P01026421
A_30_P01021351	A_30_P01026584
A_30_P01021437	A_30_P01026699
A_30_P01021445	A_30_P01026910
A_30_P01021505	A_30_P01027424
A_30_P01021573	A_30_P01027439
A_30_P01021597	A_30_P01027647
A_30_P01021601	A_30_P01027809
A_30_P01021676	A_30_P01027871
A_30_P01021740	A_30_P01028237
A_30_P01021770	A_30_P01028552
A_30_P01021803	A_30_P01028635
A_30_P01021824	A_30_P01028713
A_30_P01021827	A_30_P01028750
A_30_P01021838	A_30_P01028980
A_30_P01021849	A_30_P01029259
A_30_P01021884	A_30_P01029353
A_30_P01021892	A_30_P01029833
A_30_P01021900	A_30_P01030043
A_30_P01022035	A_30_P01030249
A_30_P01022066	A_30_P01030329
A_30_P01022092	A_30_P01030339
A_30_P01022126	A_30_P01030528
A_30_P01022132	A_30_P01030830
A_30_P01022184	A_30_P01030852
A_30_P01022203	A_30_P01030979
A_30_P01022244	A_30_P01031055
A_30_P01022255	A_30_P01031223
A_30_P01022434	A_30_P01031235
A_30_P01022452	A_30_P01031306
A_30_P01022458	A_30_P01031513
A_30_P01022474	A_30_P01031586
A_30_P01022499	A_30_P01031617
A_30_P01022549	A_30_P01031913
A_30_P01022550	A_30_P01031969
A_30_P01022598	A_30_P01032143
A_30_P01022630	A_30_P01032148
A_30_P01022723	A_30_P01032366
A_30_P01022825	A_30_P01032400
A_30_P01022827	A_30_P01032429
A_30_P01022881	A_30_P01032511
A_30_P01022896	A_30_P01032531
A_30_P01022924	A_30_P01032601
A_30_P01022973	A_30_P01032715
A_30_P01023048	A_30_P01033073
A_30_P01023068	A_30_P01033109
A_30_P01023134	A_30_P01033111
A_30_P01023143	A_30_P01033158
A_30_P01023147	A_30_P01033186
A_30_P01023174	A_30_P01033304
A_30_P01023217	A_30_P01033431
A_30_P01023250	A_30_P01033449
A_30_P01023338
A_30_P01023343
A_30_P01023353
A_30_P01023365
A_30_P01023392
A_30_P01023443
A_30_P01023508
A_30_P01023527
A_30_P01023625
A_30_P01023632
A_30_P01023639
A_30_P01023717
A_30_P01023749
A_30_P01023820
A_30_P01023823
A_30_P01023856
A_30_P01023921
A_30_P01023937
A_30_P01023953
A_30_P01023960
A_30_P01024061
A_30_P01024163
A_30_P01024275
A_30_P01024303
A_30_P01024325
A_30_P01024430
A_30_P01024432
A_30_P01024618
A_30_P01024627
A_30_P01024661
A_30_P01024702
A_30_P01024705
A_30_P01024731
A_30_P01024828
A_30_P01024830
A_30_P01024838
A_30_P01024882
A_30_P01024947
A_30_P01024950
A_30_P01024966
A_30_P01024982
A_30_P01024993
A_30_P01024995
A_30_P01025033
A_30_P01025059
A_30_P01025099
A_30_P01025105
A_30_P01025142
A_30_P01025212
A_30_P01025315
A_30_P01025341
A_30_P01025357
A_30_P01025421
A_30_P01025449
A_30_P01025460
A_30_P01025575
A_30_P01025645
A_30_P01025681
A_30_P01025697
A_30_P01025711
A_30_P01025712
A_30_P01025722
A_30_P01025730
A_30_P01025782
A_30_P01025816
A_30_P01025894
A_30_P01025904
A_30_P01026020
A_30_P01026121
A_30_P01026158
A_30_P01026257
A_30_P01026270
A_30_P01026312
A_30_P01026323
A_30_P01026413
A_30_P01026696
A_30_P01026698
A_30_P01026717
A_30_P01026789
A_30_P01026867
A_30_P01026955
A_30_P01026968
A_30_P01026990
A_30_P01027011
A_30_P01027013
A_30_P01027096
A_30_P01027104
A_30_P01027120
A_30_P01027163
A_30_P01027265
A_30_P01027318
A_30_P01027422
A_30_P01027443
A_30_P01027499
A_30_P01027521
A_30_P01027527
A_30_P01027543
A_30_P01027572
A_30_P01027577
A_30_P01027729
A_30_P01027741
A_30_P01027773
A_30_P01027855
A_30_P01027905
A_30_P01027960
A_30_P01027978
A_30_P01028005
A_30_P01028029
A_30_P01028074
A_30_P01028110
A_30_P01028114
A_30_P01028117
A_30_P01028118
A_30_P01028249
A_30_P01028257
A_30_P01028293
A_30_P01028357
A_30_P01028402
A_30_P01028502
A_30_P01028596
A_30_P01028603
A_30_P01028616
A_30_P01028691
A_30_P01028704
A_30_P01028744
A_30_P01028852
A_30_P01028879
A_30_P01028972
A_30_P01029073
A_30_P01029092
A_30_P01029204
A_30_P01029275
A_30_P01029423
A_30_P01029427
A_30_P01029460
A_30_P01029479
A_30_P01029496
A_30_P01029510
A_30_P01029521
A_30_P01029548
A_30_P01029550
A_30_P01029619
A_30_P01029628
A_30_P01029629
A_30_P01029670
A_30_P01029699
A_30_P01029748
A_30_P01029832
A_30_P01029836
A_30_P01029842
A_30_P01029848
A_30_P01029874
A_30_P01029919
A_30_P01029935
A_30_P01029986
A_30_P01030018
A_30_P01030062
A_30_P01030065
A_30_P01030070
A_30_P01030110
A_30_P01030115
A_30_P01030133
A_30_P01030232
A_30_P01030250
A_30_P01030361
A_30_P01030477
A_30_P01030513
A_30_P01030641
A_30_P01030686
A_30_P01030721
A_30_P01030800
A_30_P01030851
A_30_P01030993
A_30_P01031004
A_30_P01031005
A_30_P01031046
A_30_P01031089
A_30_P01031100
A_30_P01031231
A_30_P01031275
A_30_P01031283
A_30_P01031298
A_30_P01031310
A_30_P01031346
A_30_P01031457
A_30_P01031526
A_30_P01031628
A_30_P01031844
A_30_P01031903
A_30_P01031965
A_30_P01032003
A_30_P01032066
A_30_P01032099
A_30_P01032156
A_30_P01032158
A_30_P01032198
A_30_P01032217
A_30_P01032247
A_30_P01032253
A_30_P01032289
A_30_P01032312
A_30_P01032349
A_30_P01032378
A_30_P01032413
A_30_P01032463
A_30_P01032498
A_30_P01032554
A_30_P01032585
A_30_P01032611
A_30_P01032694
A_30_P01032744
A_30_P01032751
A_30_P01032772
A_30_P01032815
A_30_P01032822
A_30_P01032961
A_30_P01033019
A_30_P01033050
A_30_P01033117
A_30_P01033146
A_30_P01033157
A_30_P01033235
A_30_P01033267
A_30_P01033284
A_30_P01033326
A_30_P01033372
A_30_P01033387
A_30_P01033394
A_30_P01033463
A_30_P01033503
A_30_P01033532
A_30_P01033571
A_30_P01033615
A_30_P01033671

## Sheet: Blbc Linc Wk8
Table S1. LncRNA and mRNA mammary tissue expression signatures of strain differences and after LDIR.
Up	Down
A_30_P01019221	A_30_P01017540
A_30_P01019315	A_30_P01017656
A_30_P01020325	A_30_P01017677
A_30_P01020468	A_30_P01017838
A_30_P01021067	A_30_P01018096
A_30_P01022023	A_30_P01018099
A_30_P01022791	A_30_P01018335
A_30_P01022806	A_30_P01018465
A_30_P01024854	A_30_P01018678
A_30_P01025428	A_30_P01018907
A_30_P01027671	A_30_P01019061
A_30_P01028538	A_30_P01019119
A_30_P01029142	A_30_P01019171
A_30_P01029484	A_30_P01019388
A_30_P01030791	A_30_P01019524
A_30_P01031072	A_30_P01019533
A_30_P01033638	A_30_P01019576
	A_30_P01019584
	A_30_P01019738
	A_30_P01019745
	A_30_P01019875
	A_30_P01019966
	A_30_P01020056
	A_30_P01020129
	A_30_P01020159
	A_30_P01020188
	A_30_P01020338
	A_30_P01020352
	A_30_P01020378
	A_30_P01020427
	A_30_P01020451
	A_30_P01020525
	A_30_P01020561
	A_30_P01020694
	A_30_P01020735
	A_30_P01020772
	A_30_P01020779
	A_30_P01020843
	A_30_P01020857
	A_30_P01020924
	A_30_P01021179
	A_30_P01021219
	A_30_P01021232
	A_30_P01021318
	A_30_P01021322
	A_30_P01021389
	A_30_P01021409
	A_30_P01021430
	A_30_P01021438
	A_30_P01021457
	A_30_P01021466
	A_30_P01021475
	A_30_P01021548
	A_30_P01021622
	A_30_P01021904
	A_30_P01022030
	A_30_P01022184
	A_30_P01022233
	A_30_P01022277
	A_30_P01022306
	A_30_P01022355
	A_30_P01022455
	A_30_P01022480
	A_30_P01022579
	A_30_P01022695
	A_30_P01022881
	A_30_P01022883
	A_30_P01022922
	A_30_P01022954
	A_30_P01023028
	A_30_P01023155
	A_30_P01023183
	A_30_P01023194
	A_30_P01023240
	A_30_P01023278
	A_30_P01023374
	A_30_P01023476
	A_30_P01023557
	A_30_P01023603
	A_30_P01023629
	A_30_P01023711
	A_30_P01023866
	A_30_P01024060
	A_30_P01024098
	A_30_P01024110
	A_30_P01024160
	A_30_P01024187
	A_30_P01024203
	A_30_P01024221
	A_30_P01024235
	A_30_P01024420
	A_30_P01024477
	A_30_P01024518
	A_30_P01024520
	A_30_P01024577
	A_30_P01024620
	A_30_P01024675
	A_30_P01024698
	A_30_P01024859
	A_30_P01024863
	A_30_P01024868
	A_30_P01025060
	A_30_P01025067
	A_30_P01025157
	A_30_P01025243
	A_30_P01025246
	A_30_P01025274
	A_30_P01025310
	A_30_P01025439
	A_30_P01025510
	A_30_P01025604
	A_30_P01025613
	A_30_P01025711
	A_30_P01025789
	A_30_P01025843
	A_30_P01025912
	A_30_P01026237
	A_30_P01026370
	A_30_P01026374
	A_30_P01026405
	A_30_P01026439
	A_30_P01026509
	A_30_P01026578
	A_30_P01026632
	A_30_P01026649
	A_30_P01026701
	A_30_P01026755
	A_30_P01026915
	A_30_P01026988
	A_30_P01027013
	A_30_P01027026
	A_30_P01027038
	A_30_P01027259
	A_30_P01027305
	A_30_P01027533
	A_30_P01027682
	A_30_P01027708
	A_30_P01027819
	A_30_P01027879
	A_30_P01027923
	A_30_P01027939
	A_30_P01028200
	A_30_P01028202
	A_30_P01028267
	A_30_P01028448
	A_30_P01028477
	A_30_P01028661
	A_30_P01028664
	A_30_P01028693
	A_30_P01028721
	A_30_P01028792
	A_30_P01028918
	A_30_P01028942
	A_30_P01029129
	A_30_P01029150
	A_30_P01029158
	A_30_P01029229
	A_30_P01029234
	A_30_P01029263
	A_30_P01029487
	A_30_P01029494
	A_30_P01029509
	A_30_P01029654
	A_30_P01029772
	A_30_P01029794
	A_30_P01029795
	A_30_P01029892
	A_30_P01029926
	A_30_P01030005
	A_30_P01030200
	A_30_P01030282
	A_30_P01030328
	A_30_P01030393
	A_30_P01030426
	A_30_P01030482
	A_30_P01030546
	A_30_P01030615
	A_30_P01030832
	A_30_P01030864
	A_30_P01030903
	A_30_P01030904
	A_30_P01030914
	A_30_P01030973
	A_30_P01031028
	A_30_P01031237
	A_30_P01031269
	A_30_P01031354
	A_30_P01031456
	A_30_P01031496
	A_30_P01031616
	A_30_P01031656
	A_30_P01031684
	A_30_P01031785
	A_30_P01031855
	A_30_P01031975
	A_30_P01032174
	A_30_P01032234
	A_30_P01032346
	A_30_P01032349
	A_30_P01032534
	A_30_P01032669
	A_30_P01032750
	A_30_P01032757
	A_30_P01032826
	A_30_P01032866
	A_30_P01033016
	A_30_P01033046
	A_30_P01033071
	A_30_P01033078
	A_30_P01033122
	A_30_P01033141
	A_30_P01033156
	A_30_P01033232
	A_30_P01033363
	A_30_P01033440
	A_30_P01033470
	A_30_P01033580
	A_30_P01033624

## Sheet: Spr Linc Wk4
Table S1. LncRNA and mRNA mammary tissue expression signatures of strain differences and after LDIR.
Up	Down
A_30_P01017436	A_30_P01017487
A_30_P01017479	A_30_P01017556
A_30_P01017551	A_30_P01017939
A_30_P01017600	A_30_P01018625
A_30_P01017662	A_30_P01018777
A_30_P01017672	A_30_P01019595
A_30_P01017727	A_30_P01019608
A_30_P01017863	A_30_P01020124
A_30_P01017901	A_30_P01020241
A_30_P01018008	A_30_P01020527
A_30_P01018054	A_30_P01020539
A_30_P01018126	A_30_P01020619
A_30_P01018211	A_30_P01021084
A_30_P01018223	A_30_P01021129
A_30_P01018379	A_30_P01021337
A_30_P01018391	A_30_P01021468
A_30_P01018561	A_30_P01021512
A_30_P01018797	A_30_P01021552
A_30_P01018846	A_30_P01021565
A_30_P01018968	A_30_P01021599
A_30_P01019012	A_30_P01021686
A_30_P01019252	A_30_P01021882
A_30_P01019400	A_30_P01021932
A_30_P01019434	A_30_P01022285
A_30_P01019525	A_30_P01022591
A_30_P01019550	A_30_P01022710
A_30_P01019650	A_30_P01022913
A_30_P01019744	A_30_P01023152
A_30_P01019821	A_30_P01023297
A_30_P01019858	A_30_P01023444
A_30_P01019996	A_30_P01024003
A_30_P01020058	A_30_P01024207
A_30_P01020197	A_30_P01024464
A_30_P01020238	A_30_P01024542
A_30_P01020293	A_30_P01024626
A_30_P01020398	A_30_P01024720
A_30_P01020484	A_30_P01024751
A_30_P01020563	A_30_P01025339
A_30_P01020575	A_30_P01025457
A_30_P01020646	A_30_P01025460
A_30_P01020670	A_30_P01025478
A_30_P01020694	A_30_P01025969
A_30_P01020817	A_30_P01026310
A_30_P01020881	A_30_P01026394
A_30_P01020913	A_30_P01026421
A_30_P01020948	A_30_P01026472
A_30_P01021071	A_30_P01027042
A_30_P01021089	A_30_P01027311
A_30_P01021150	A_30_P01027347
A_30_P01021166	A_30_P01028442
A_30_P01021201	A_30_P01028551
A_30_P01021429	A_30_P01028849
A_30_P01021450	A_30_P01029096
A_30_P01021601	A_30_P01029288
A_30_P01021661	A_30_P01029443
A_30_P01021675	A_30_P01029517
A_30_P01022077	A_30_P01029560
A_30_P01022078	A_30_P01030254
A_30_P01022153	A_30_P01030557
A_30_P01022226	A_30_P01030637
A_30_P01022286	A_30_P01030792
A_30_P01022550	A_30_P01030867
A_30_P01022616	A_30_P01030899
A_30_P01022695	A_30_P01031124
A_30_P01022754	A_30_P01031208
A_30_P01022793	A_30_P01031223
A_30_P01022926	A_30_P01031414
A_30_P01023001	A_30_P01031801
A_30_P01023009	A_30_P01031966
A_30_P01023034	A_30_P01032333
A_30_P01023044	A_30_P01032611
A_30_P01023099	A_30_P01032683
A_30_P01023202	A_30_P01032687
A_30_P01023288	A_30_P01032734
A_30_P01023327	A_30_P01032791
A_30_P01023336	A_30_P01033011
A_30_P01023395	A_30_P01033387
A_30_P01023460	A_30_P01033435
A_30_P01023650	A_30_P01033585
A_30_P01023656
A_30_P01023684
A_30_P01023689
A_30_P01023691
A_30_P01023773
A_30_P01023782
A_30_P01024018
A_30_P01024025
A_30_P01024130
A_30_P01024148
A_30_P01024194
A_30_P01024225
A_30_P01024312
A_30_P01024417
A_30_P01024420
A_30_P01024526
A_30_P01024536
A_30_P01024763
A_30_P01024786
A_30_P01024806
A_30_P01024816
A_30_P01024834
A_30_P01024836
A_30_P01024924
A_30_P01024975
A_30_P01025034
A_30_P01025064
A_30_P01025099
A_30_P01025169
A_30_P01025244
A_30_P01025262
A_30_P01025347
A_30_P01025371
A_30_P01025432
A_30_P01025520
A_30_P01025543
A_30_P01025555
A_30_P01025579
A_30_P01025668
A_30_P01025677
A_30_P01025724
A_30_P01025774
A_30_P01025786
A_30_P01025926
A_30_P01025999
A_30_P01026030
A_30_P01026035
A_30_P01026058
A_30_P01026135
A_30_P01026158
A_30_P01026186
A_30_P01026239
A_30_P01026290
A_30_P01026298
A_30_P01026768
A_30_P01026893
A_30_P01026920
A_30_P01027033
A_30_P01027063
A_30_P01027069
A_30_P01027079
A_30_P01027163
A_30_P01027210
A_30_P01027217
A_30_P01027256
A_30_P01027308
A_30_P01027448
A_30_P01027531
A_30_P01027580
A_30_P01027595
A_30_P01027620
A_30_P01027731
A_30_P01027750
A_30_P01027766
A_30_P01027786
A_30_P01027825
A_30_P01027934
A_30_P01027944
A_30_P01028192
A_30_P01028264
A_30_P01028307
A_30_P01028335
A_30_P01028352
A_30_P01028414
A_30_P01028419
A_30_P01028438
A_30_P01028463
A_30_P01028531
A_30_P01028536
A_30_P01028541
A_30_P01028672
A_30_P01028692
A_30_P01028693
A_30_P01028715
A_30_P01028767
A_30_P01028772
A_30_P01028786
A_30_P01028820
A_30_P01028851
A_30_P01028902
A_30_P01029135
A_30_P01029151
A_30_P01029246
A_30_P01029286
A_30_P01029302
A_30_P01029308
A_30_P01029367
A_30_P01029461
A_30_P01029471
A_30_P01029617
A_30_P01029775
A_30_P01029785
A_30_P01029814
A_30_P01029816
A_30_P01029985
A_30_P01030037
A_30_P01030318
A_30_P01030327
A_30_P01030354
A_30_P01030415
A_30_P01030444
A_30_P01030463
A_30_P01030628
A_30_P01030684
A_30_P01030695
A_30_P01030743
A_30_P01030797
A_30_P01030864
A_30_P01031115
A_30_P01031160
A_30_P01031185
A_30_P01031225
A_30_P01031236
A_30_P01031451
A_30_P01031489
A_30_P01031512
A_30_P01031527
A_30_P01031581
A_30_P01031584
A_30_P01031594
A_30_P01031717
A_30_P01031760
A_30_P01031839
A_30_P01031909
A_30_P01031948
A_30_P01032122
A_30_P01032137
A_30_P01032213
A_30_P01032346
A_30_P01032482
A_30_P01032637
A_30_P01032653
A_30_P01032676
A_30_P01032914
A_30_P01032987
A_30_P01033031
A_30_P01033038
A_30_P01033065
A_30_P01033103
A_30_P01033135
A_30_P01033141
A_30_P01033265
A_30_P01033317
A_30_P01033352
A_30_P01033411
A_30_P01033419
A_30_P01033433
A_30_P01033552
A_30_P01033590
