# Supplementary material for: Genetic Background Modulates lncRNA-Coordinated Tissue Response to Low Dose Ionizing Radiation
Source: Int J Genomics. 2015 Feb 23;2015:461038. doi: 10.1155/2015/461038 (PMC4353441; doi:10.1155/2015/461038)
Supplement: Supplementary file 1 — Supplementary Data: The supplementary data include supplementary tables (S1 to S4) and supplementary figures (S1 to S3). Table S1: LncRNA and mRNA mammary tissue expression signatures of strain differences and after LDIR. Table S2: Baseline gene expression differences in mammary gland tissue of BALB/c and SPRET/EiJ are associated with diverse biological funcitons. Table S3: Upstream transcriptional regulators associated with low-dose radiation response in mammary glands of BALB/c and SPRET/EiJ mice. Table S4: Correlations between lncRNA and coding RNA expression in BALB/c and SPRET/EiJ mammary tissues after LDIR exposure. Figure S1: LncRNA and coding RNA expression changes in mammary tissues of BALB/c and SPRET/EiJ mice. For each time-point, differentially expressed lncRNA (A) or coding RNAs (B) between sham and low-dose irradiated glands were identified by the unpaired Student's t-test with a p-value cut-off of 0.05 and a fold change criteria of more than 1.5. C. Comparison of differentially expressed lncRNAs (left) and coding RNAs (right) in BALB/c and SPRET/EiJ mice four weeks after LDIR exposure. (BC=BALB/c; SPR=SPRET/EiJ; lnc=lncRNA; cd=coding gene). Figure S2: LncRNA and coding RNA expression levels are correlated in mammary tissues after low dose radiation exposure. Representative examples of networks of the same lncRNAs (pink) significantly correlated in expression with mRNAs (purple) after LDIR in mammary tissues of BALB/c mice at 2 and 4 weeks after exposure, 4 and 8 weeks after exposure and 2 and 8 weeks after exposure. Figure S3: Annotation of the molecular shapes used in gene interaction networks. Graphical representation of commonly used molecular shapes in interaction networks generated by Ingenuity Pathway Analysis. [file 461038.f1.zip › Table_S2_GObaseline.xlsx]

## Sheet: Table_S2
Table S2. Baseline gene expression differences in mammary gland tissue of BALB/c and SPRET/EiJ are associated with diverse biological funcitons.
User file and parameters: User file: textAreaUpload.txt, Organism: mmusculus, Id Type: agilent_wholegenome_4x44k_v2, Ref Set: entrezgene, Significance Level: .05, Statistics Test: Hypergeometric, MTC: BH, Minimum: 2
biological process	metabolic process	GO:0008152
C=9069;O=295;E=225.78;R=1.31;rawP=3.28e-09;adjP=5.90e-06
A_52_P478236	NA	Wrn	Werner syndrome homolog (human)	22427	ENSMUSG00000031583
A_55_P2149269	NA	Galt	galactose-1-phosphate uridyl transferase	14430	ENSMUSG00000036073
A_55_P1998354	NA	Wbp4	WW domain binding protein 4	22380	ENSMUSG00000022023
A_55_P1954569	NA	Hmgcs1	3-hydroxy-3-methylglutaryl-Coenzyme A synthase 1	208715	ENSMUSG00000093930
A_55_P2012552	NA	Nap1l5	nucleosome assembly protein 1-like 5	58243	ENSMUSG00000055430
A_55_P2078084	NA	Gm13011	predicted gene 13011	242711	ENSMUSG00000078520
A_55_P2031466	NA	Lrrc32	leucine rich repeat containing 32	434215	ENSMUSG00000090958
A_55_P1994194	NA	Heph	hephaestin	15203	ENSMUSG00000031209
A_55_P1975155	NA	Galnt6	UDP-N-acetyl-alpha-D-galactosamine:polypeptide N-acetylgalactosaminyltransferase 6	207839	ENSMUSG00000037280
A_55_P2074366	NA	Yars	tyrosyl-tRNA synthetase	107271	ENSMUSG00000028811
A_51_P468505	NA	2810408M09Rik	RIKEN cDNA 2810408M09 gene	381406	ENSMUSG00000039725
A_55_P2324712	NA	Dmrt1	doublesex and mab-3 related transcription factor 1	50796	ENSMUSG00000024837
A_55_P2061094	NA	Fnta	farnesyltransferase, CAAX box, alpha	14272	ENSMUSG00000015994
A_52_P341339	NA	Sos1	son of sevenless homolog 1 (Drosophila)	20662	ENSMUSG00000024241
A_66_P107038	NA	Prcp	prolylcarboxypeptidase (angiotensinase C)	72461	ENSMUSG00000061119
A_51_P379710	NA	Rpn1	ribophorin I	103963	ENSMUSG00000030062
A_51_P343356	NA	Isoc2b	isochorismatase domain containing 2b	67441	ENSMUSG00000052605
A_55_P2016346	NA	Eif3d	eukaryotic translation initiation factor 3, subunit D	55944	ENSMUSG00000016554
A_55_P2237129	NA	St6galnac5	ST6 (alpha-N-acetyl-neuraminyl-2,3-beta-galactosyl-1,3)-N-acetylgalactosaminide alpha-2,6-sialyltransferase 5	26938	ENSMUSG00000039037
A_55_P1966755	NA	Cyp2r1	cytochrome P450, family 2, subfamily r, polypeptide 1	244209	ENSMUSG00000030670
A_51_P424532	NA	Vnn1	vanin 1	22361	ENSMUSG00000037440
A_55_P2037712	NA	Smc4	structural maintenance of chromosomes 4	70099	ENSMUSG00000034349
A_66_P123683	NA	Nabp1	nucleic acid binding protein 1	109019	ENSMUSG00000026107
A_55_P1994862	NA	Ddx60	DEAD (Asp-Glu-Ala-Asp) box polypeptide 60	234311	ENSMUSG00000037921
A_51_P506683	NA	Fbxw7	F-box and WD-40 domain protein 7	50754	ENSMUSG00000028086
A_52_P612382	NA	Cdc25b	cell division cycle 25B	12531	ENSMUSG00000027330
A_55_P2177899	NA	Dact1	dapper homolog 1, antagonist of beta-catenin (xenopus)	59036	ENSMUSG00000044548
A_55_P2123727	NA	Grb2	growth factor receptor bound protein 2	14784	ENSMUSG00000059923
A_55_P2013569	NA	Agbl4	ATP/GTP binding protein-like 4	78933	ENSMUSG00000061298
A_51_P180452	NA	Crk	v-crk sarcoma virus CT10 oncogene homolog (avian)	12928	ENSMUSG00000017776
A_55_P2008452	NA	Wtap	Wilms' tumour 1-associating protein	60532	ENSMUSG00000060475
A_55_P2106922	NA	Arfgap3	ADP-ribosylation factor GTPase activating protein 3	66251	ENSMUSG00000054277
A_55_P2120956	NA	Arfgap3	ADP-ribosylation factor GTPase activating protein 3	66251	ENSMUSG00000054277
A_51_P432851	NA	Dhrs11	dehydrogenase/reductase (SDR family) member 11	192970	ENSMUSG00000034449
A_55_P2172924	NA	Mettl6	methyltransferase like 6	67011	ENSMUSG00000021891
A_52_P385536	NA	Ddx58	DEAD (Asp-Glu-Ala-Asp) box polypeptide 58	230073	ENSMUSG00000040296
A_51_P443293	NA	Decr2	2-4-dienoyl-Coenzyme A reductase 2, peroxisomal	26378	ENSMUSG00000036775
A_51_P450169	NA	Dnajb13	DnaJ (Hsp40) related, subfamily B, member 13	69387	ENSMUSG00000030708
A_52_P745	NA	Acox3	acyl-Coenzyme A oxidase 3, pristanoyl	80911	ENSMUSG00000029098
A_51_P343913	NA	Parp4	poly (ADP-ribose) polymerase family, member 4	328417	ENSMUSG00000054509
A_51_P234544	NA	Azin1	antizyme inhibitor 1	54375	ENSMUSG00000037458
A_55_P2130256	NA	Polr2l	polymerase (RNA) II (DNA directed) polypeptide L	66491	ENSMUSG00000038489
A_52_P483129	NA	Utp23	UTP23, small subunit (SSU) processome component, homolog (yeast)	78581	ENSMUSG00000022313
A_51_P425824	NA	Fam132a	family with sequence similarity 132, member A	67389	ENSMUSG00000023571
A_55_P2053241	NA	Gng4	guanine nucleotide binding protein (G protein), gamma 4	14706	ENSMUSG00000021303
A_55_P2015520	NA	Plekha1	pleckstrin homology domain containing, family A (phosphoinositide binding specific) member 1	101476	ENSMUSG00000040268
A_55_P2156855	NA	Car13	carbonic anhydrase 13	71934	ENSMUSG00000027555
A_55_P2035667	NA	Gyk	glycerol kinase	14933	ENSMUSG00000025059
A_52_P585699	NA	Ciao1	cytosolic iron-sulfur protein assembly 1	26371	ENSMUSG00000003662
A_55_P2103060	NA	Pxk	PX domain containing serine/threonine kinase	218699	ENSMUSG00000033885
A_55_P2071466	NA	Ncf1	neutrophil cytosolic factor 1	17969	ENSMUSG00000015950
A_55_P1957739	NA	Guca2b	guanylate cyclase activator 2b (retina)	14916	ENSMUSG00000032978
A_52_P179068	NA	Gucy1b3	guanylate cyclase 1, soluble, beta 3	54195	ENSMUSG00000028005
A_55_P2046793	NA	Eogt	EGF domain-specific O-linked N-acetylglucosamine (GlcNAc) transferase	101351	ENSMUSG00000035245
A_52_P270145	NA	Zfp329	zinc finger protein 329	67230	ENSMUSG00000057894
A_55_P2049252	NA	Mapkapk5	MAP kinase-activated protein kinase 5	17165	ENSMUSG00000029454
A_51_P518488	NA	Atpif1	ATPase inhibitory factor 1	11983	ENSMUSG00000054428
A_51_P483473	NA	St3gal5	ST3 beta-galactoside alpha-2,3-sialyltransferase 5	20454	ENSMUSG00000056091
A_55_P2138956	NA	Tpk1	thiamine pyrophosphokinase	29807	ENSMUSG00000029735
A_51_P106952	NA	Rbm26	RNA binding motif protein 26	74213	ENSMUSG00000022119
A_51_P369784	NA	Ces1e	carboxylesterase 1E	13897	ENSMUSG00000061959
A_55_P2080130	NA	Aim2	absent in melanoma 2	383619	ENSMUSG00000037860
A_52_P430169	NA	Dip2b	DIP2 disco-interacting protein 2 homolog B (Drosophila)	239667	ENSMUSG00000023026
A_55_P1995404	NA	Cd59b	CD59b antigen	333883	ENSMUSG00000068686
A_52_P494115	NA	Gatad2b	GATA zinc finger domain containing 2B	229542	ENSMUSG00000042390
A_55_P1953961	NA	Cdkl3	cyclin-dependent kinase-like 3	213084	ENSMUSG00000020389
A_55_P2142439	NA	Echdc2	enoyl Coenzyme A hydratase domain containing 2	52430	ENSMUSG00000028601
A_51_P483280	NA	Prnp	prion protein	19122	ENSMUSG00000079037
A_66_P105175	NA	Bche	butyrylcholinesterase	12038	ENSMUSG00000027792
A_52_P500002	NA	Tspyl5	testis-specific protein, Y-encoded-like 5	239364	ENSMUSG00000038984
A_55_P2081616	NA	Timeless	timeless homolog (Drosophila)	21853	ENSMUSG00000039994
A_55_P1982585	NA	Kdm4a	lysine (K)-specific demethylase 4A	230674	ENSMUSG00000033326
A_55_P2084332	NA	Pigp	phosphatidylinositol glycan anchor biosynthesis, class P	56176	ENSMUSG00000022940
A_55_P1962946	NA	Syk	spleen tyrosine kinase	20963	ENSMUSG00000021457
A_55_P2147220	NA	Ak2	adenylate kinase 2	11637	ENSMUSG00000028792
A_51_P117226	NA	Zdhhc2	zinc finger, DHHC domain containing 2	70546	ENSMUSG00000039470
A_52_P651248	NA	Zdhhc2	zinc finger, DHHC domain containing 2	70546	ENSMUSG00000039470
A_55_P2148082	NA	Larp7	La ribonucleoprotein domain family, member 7	28036	ENSMUSG00000027968
A_55_P1958447	NA	Prepl	prolyl endopeptidase-like	213760	ENSMUSG00000024127
A_52_P491073	NA	Nek8	NIMA (never in mitosis gene a)-related expressed kinase 8	140859	ENSMUSG00000017405
A_51_P329818	NA	Dpep3	dipeptidase 3	71854	ENSMUSG00000031898
A_55_P2086825	NA	Rgl3	ral guanine nucleotide dissociation stimulator-like 3	71746	ENSMUSG00000040146
A_51_P388374	NA	Ppil4	peptidylprolyl isomerase (cyclophilin)-like 4	67418	ENSMUSG00000015757
A_55_P1991851	NA	Speg	SPEG complex locus	11790	ENSMUSG00000026207
A_55_P2060498	NA	Zfp553	zinc finger protein 553	233887	ENSMUSG00000045598
A_55_P2031636	NA	Igf1	insulin-like growth factor 1	16000	ENSMUSG00000020053
A_55_P1976690	NA	Snrnp35	small nuclear ribonucleoprotein 35 (U11/U12)	76167	ENSMUSG00000029402
A_52_P85765	NA	Stard6	StAR-related lipid transfer (START) domain containing 6	170461	ENSMUSG00000079608
A_55_P2040777	NA	Lipo1	lipase, member O1	381236	ENSMUSG00000024766
A_65_P08971	NA	F3	coagulation factor III	14066	ENSMUSG00000028128
A_55_P1990849	NA	Dclre1b	DNA cross-link repair 1B, PSO2 homolog (S. cerevisiae)	140917	ENSMUSG00000027845
A_51_P150120	NA	Mgst2	microsomal glutathione S-transferase 2	211666	ENSMUSG00000074604
A_55_P2144766	NA	Pigc	phosphatidylinositol glycan anchor biosynthesis, class C	67292	ENSMUSG00000026698
A_55_P2011545	NA	Pyroxd1	pyridine nucleotide-disulphide oxidoreductase domain 1	232491	ENSMUSG00000041671
A_55_P1953919	NA	Me3	malic enzyme 3, NADP(+)-dependent, mitochondrial	109264	ENSMUSG00000030621
A_52_P537852	NA	Fam120b	family with sequence similarity 120B	67544	ENSMUSG00000014763
A_55_P2130610	NA	Smc3	structural maintenance of chromosomes 3	13006	ENSMUSG00000024974
A_55_P2051914	NA	Zfp568	zinc finger protein 568	243905	ENSMUSG00000074221
A_55_P2119463	NA	Ggh	gamma-glutamyl hydrolase	14590	ENSMUSG00000073987
A_66_P134090	NA	Grpel2	GrpE-like 2, mitochondrial	17714	ENSMUSG00000024580
A_55_P1987730	NA	5730469M10Rik	RIKEN cDNA 5730469M10 gene	70564	ENSMUSG00000021792
A_55_P1981050	NA	Gemin8	gem (nuclear organelle) associated protein 8	237221	ENSMUSG00000040621
A_66_P123787	NA	Lars2	leucyl-tRNA synthetase, mitochondrial	102436	ENSMUSG00000035202
A_55_P2036967	NA	Cox17	cytochrome c oxidase, subunit XVII assembly protein homolog (yeast)	12856	ENSMUSG00000046516
A_55_P2074631	NA	Cpeb1	cytoplasmic polyadenylation element binding protein 1	12877	ENSMUSG00000025586
A_55_P2075127	NA	Pax2	paired box gene 2	18504	ENSMUSG00000004231
A_55_P2049388	NA	Zfp28	zinc finger protein 28	22690	ENSMUSG00000062861
A_52_P427240	NA	Ltn1	listerin E3 ubiquitin protein ligase 1	78913	ENSMUSG00000052299
A_51_P444437	NA	Ptgr1	prostaglandin reductase 1	67103	ENSMUSG00000028378
A_51_P466221	NA	Amhr2	anti-Mullerian hormone type 2 receptor	110542	ENSMUSG00000023047
A_55_P1996674	NA	Itih3	inter-alpha trypsin inhibitor, heavy chain 3	16426	ENSMUSG00000006522
A_52_P156190	NA	Ednra	endothelin receptor type A	13617	ENSMUSG00000031616
A_55_P2185950	NA	Bpnt1	bisphosphate 3'-nucleotidase 1	23827	ENSMUSG00000026617
A_55_P2051778	NA	Sult2b1	sulfotransferase family, cytosolic, 2B, member 1	54200	ENSMUSG00000003271
A_55_P2120433	NA	Wdr12	WD repeat domain 12	57750	ENSMUSG00000026019
A_55_P2003483	NA	Gldc	glycine decarboxylase	104174	ENSMUSG00000024827
A_52_P164797	NA	Lct	lactase	226413	ENSMUSG00000026354
A_51_P340402	NA	Eefsec	eukaryotic elongation factor, selenocysteine-tRNA-specific	65967	ENSMUSG00000033216
A_55_P2379599	NA	Asph	aspartate-beta-hydroxylase	65973	ENSMUSG00000028207
A_55_P2076288	NA	Zfp661	zinc finger protein 661	72180	ENSMUSG00000034800
A_55_P2124425	NA	Zfp661	zinc finger protein 661	72180	ENSMUSG00000034800
A_52_P330395	NA	Farp1	FERM, RhoGEF (Arhgef) and pleckstrin domain protein 1 (chondrocyte-derived)	223254	ENSMUSG00000025555
A_55_P2034260	NA	Ctdsp1	CTD (carboxy-terminal domain, RNA polymerase II, polypeptide A) small phosphatase 1	227292	ENSMUSG00000026176
A_51_P491051	NA	Ints9	integrator complex subunit 9	210925	ENSMUSG00000021975
A_55_P2158483	NA	Nkiras2	NFKB inhibitor interacting Ras-like protein 2	71966	ENSMUSG00000017837
A_52_P359502	NA	Pdxk	pyridoxal (pyridoxine, vitamin B6) kinase	216134	ENSMUSG00000032788
A_52_P475080	NA	Arsk	arylsulfatase K	77041	ENSMUSG00000021592
A_51_P472531	NA	Arsk	arylsulfatase K	77041	ENSMUSG00000021592
A_51_P493105	NA	Mettl15	methyltransferase like 15	76894	ENSMUSG00000057234
A_52_P459929	NA	Itga1	integrin alpha 1	109700	ENSMUSG00000042284
A_51_P201480	NA	Stat3	signal transducer and activator of transcription 3	20848	ENSMUSG00000004040
A_51_P511899	NA	Mthfsd	methenyltetrahydrofolate synthetase domain containing	234814	ENSMUSG00000031816
A_55_P1965655	NA	Mtmr14	myotubularin related protein 14	97287	ENSMUSG00000030269
A_51_P104933	NA	Trub2	TruB pseudouridine (psi) synthase homolog 2 (E. coli)	227682	ENSMUSG00000039826
A_55_P1986351	NA	D630037F22Rik	RIKEN cDNA D630037F22 gene	544696	ENSMUSG00000038122
A_52_P136709	NA	Pctp	phosphatidylcholine transfer protein	18559	ENSMUSG00000020553
A_55_P2058923	NA	Wbscr22	Williams Beuren syndrome chromosome region 22	66138	ENSMUSG00000005378
A_51_P452768	NA	Cyp4f14	cytochrome P450, family 4, subfamily f, polypeptide 14	64385	ENSMUSG00000024292
A_55_P2067116	NA	Dclre1c	DNA cross-link repair 1C, PSO2 homolog (S. cerevisiae)	227525	ENSMUSG00000026648
A_55_P1953723	NA	Rab13	RAB13, member RAS oncogene family	68328	ENSMUSG00000027935
A_51_P447668	NA	Ptpn12	protein tyrosine phosphatase, non-receptor type 12	19248	ENSMUSG00000028771
A_65_P19112	NA	Zfp397	zinc finger protein 397	69256	ENSMUSG00000024276
A_55_P2044463	NA	Lipt2	lipoyl(octanoyl) transferase 2 (putative)	67164	ENSMUSG00000030725
A_55_P2159830	NA	Yaf2	YY1 associated factor 2	67057	ENSMUSG00000022634
A_55_P2118799	NA	Rmi1	RMI1, RecQ mediated genome instability 1, homolog (S. cerevisiae)	74386	ENSMUSG00000035367
A_51_P178828	NA	Mbl2	mannose-binding lectin (protein C) 2	17195	ENSMUSG00000024863
A_55_P1961140	NA	Mettl3	methyltransferase like 3	56335	ENSMUSG00000022160
A_55_P2097729	NA	Gtpbp4	GTP binding protein 4	69237	ENSMUSG00000021149
A_51_P505662	NA	4933437F05Rik	RIKEN cDNA 4933437F05 gene	71275	ENSMUSG00000072919
A_66_P106836	NA	Kmo	kynurenine 3-monooxygenase (kynurenine 3-hydroxylase)	98256	ENSMUSG00000039783
A_51_P262144	NA	Ddx19b	DEAD (Asp-Glu-Ala-Asp) box polypeptide 19b	234733	ENSMUSG00000033658
A_55_P2045792	NA	Pes1	pescadillo homolog 1, containing BRCT domain (zebrafish)	64934	ENSMUSG00000020430
A_51_P289742	NA	Slc27a5	solute carrier family 27 (fatty acid transporter), member 5	26459	ENSMUSG00000030382
A_55_P2117903	NA	Stard5	StAR-related lipid transfer (START) domain containing 5	170460	ENSMUSG00000046027
A_51_P232858	NA	Rpl14	ribosomal protein L14	67115	ENSMUSG00000025794
A_51_P235440	NA	Pelp1	proline, glutamic acid and leucine rich protein 1	75273	ENSMUSG00000018921
A_55_P1966878	NA	Rnaseh2a	ribonuclease H2, large subunit	69724	ENSMUSG00000052926
A_66_P132295	NA	Tfpi	tissue factor pathway inhibitor	21788	ENSMUSG00000027082
A_51_P379083	NA	Adam24	a disintegrin and metallopeptidase domain 24 (testase 1)	13526	ENSMUSG00000046723
A_51_P400463	NA	Agmat	agmatine ureohydrolase (agmatinase)	75986	ENSMUSG00000040706
A_55_P2120615	NA	Ssh3	slingshot homolog 3 (Drosophila)	245857	ENSMUSG00000034616
A_52_P52156	NA	Isoc2a	isochorismatase domain containing 2a	664994	ENSMUSG00000086784
A_51_P441469	NA	Jmy	junction-mediating and regulatory protein	57748	ENSMUSG00000021690
A_55_P2151609	NA	Sorl1	sortilin-related receptor, LDLR class A repeats-containing	20660	ENSMUSG00000049313
A_55_P1970299	NA	Mttp	microsomal triglyceride transfer protein	17777	ENSMUSG00000028158
A_52_P211418	NA	G2e3	G2/M-phase specific E3 ubiquitin ligase	217558	ENSMUSG00000035293
A_55_P2107957	NA	Fam175a	family with sequence similarity 175, member A	70681	ENSMUSG00000035234
A_52_P439263	NA	Ugt8a	UDP galactosyltransferase 8A	22239	ENSMUSG00000032854
A_51_P362738	NA	Dusp18	dual specificity phosphatase 18	75219	ENSMUSG00000047205
A_55_P1992319	NA	Col4a3bp	collagen, type IV, alpha 3 (Goodpasture antigen) binding protein	68018	ENSMUSG00000021669
A_55_P2001458	NA	Zscan29	zinc finger SCAN domains 29	99334	ENSMUSG00000050619
A_52_P249920	NA	Zscan29	zinc finger SCAN domains 29	99334	ENSMUSG00000050619
A_52_P266530	NA	Ide	insulin degrading enzyme	15925	ENSMUSG00000056999
A_51_P350048	NA	Gstt2	glutathione S-transferase, theta 2	14872	ENSMUSG00000033318
A_51_P334789	NA	Nudt16	nudix (nucleoside diphosphate linked moiety X)-type motif 16	75686	ENSMUSG00000032565
A_55_P2158107	NA	Ddx31	DEAD/H (Asp-Glu-Ala-Asp/His) box polypeptide 31	227674	ENSMUSG00000026806
A_52_P556082	NA	Trmt2b	TRM2 tRNA methyltransferase 2 homolog B (S. cerevisiae)	215201	ENSMUSG00000067369
A_51_P394115	NA	Aadac	arylacetamide deacetylase (esterase)	67758	ENSMUSG00000027761
A_52_P467046	NA	Wdr48	WD repeat domain 48	67561	ENSMUSG00000032512
A_51_P108659	NA	Pon1	paraoxonase 1	18979	ENSMUSG00000002588
A_55_P1963031	NA	Ampd2	adenosine monophosphate deaminase 2	109674	ENSMUSG00000027889
A_51_P412809	NA	Dqx1	DEAQ RNA-dependent ATPase	93838	ENSMUSG00000009145
A_51_P448814	NA	Zfp90	zinc finger protein 90	22751	ENSMUSG00000031907
A_55_P1984023	NA	Arrb2	arrestin, beta 2	216869	ENSMUSG00000060216
A_51_P510764	NA	Agmo	alkylglycerol monooxygenase	319660	ENSMUSG00000050103
A_55_P1972054	NA	Capn10	calpain 10	23830	ENSMUSG00000026270
A_55_P1992329	NA	Gmpr	guanosine monophosphate reductase	66355	ENSMUSG00000000253
A_55_P2137431	NA	Rtel1	regulator of telomere elongation helicase 1	269400	ENSMUSG00000038685
A_55_P2141943	NA	Ube2l6	ubiquitin-conjugating enzyme E2L 6	56791	ENSMUSG00000027078
A_55_P2114596	NA	Zfp161	zinc finger protein 161	22666	ENSMUSG00000049672
A_55_P2093163	NA	Zfp161	zinc finger protein 161	22666	ENSMUSG00000049672
A_51_P314161	NA	Qtrt1	queuine tRNA-ribosyltransferase 1	60507	ENSMUSG00000002825
A_55_P2055257	NA	Maoa	monoamine oxidase A	17161	ENSMUSG00000025037
A_52_P191086	NA	Kcnj6	potassium inwardly-rectifying channel, subfamily J, member 6	16522	ENSMUSG00000043301
A_51_P461429	NA	Cyp7b1	cytochrome P450, family 7, subfamily b, polypeptide 1	13123	ENSMUSG00000039519
A_55_P1975140	NA	Acvr1c	activin A receptor, type IC	269275	ENSMUSG00000026834
A_55_P2064203	NA	Acvr1c	activin A receptor, type IC	269275	ENSMUSG00000026834
A_51_P476261	NA	Zfp120	zinc finger protein 120	104348	ENSMUSG00000068134
A_55_P2002727	NA	Inpp4a	inositol polyphosphate-4-phosphatase, type I	269180	ENSMUSG00000026113
A_52_P559919	NA	Eif2ak2	eukaryotic translation initiation factor 2-alpha kinase 2	19106	ENSMUSG00000024079
A_55_P2060107	NA	Pkm	pyruvate kinase, muscle	18746	ENSMUSG00000032294
A_55_P2134496	NA	Amfr	autocrine motility factor receptor	23802	ENSMUSG00000031751
A_55_P2146314	NA	Lmx1a	LIM homeobox transcription factor 1 alpha	110648	ENSMUSG00000026686
A_52_P359965	NA	Cpd	carboxypeptidase D	12874	ENSMUSG00000020841
A_51_P285779	NA	Asphd2	aspartate beta-hydroxylase domain containing 2	72898	ENSMUSG00000029348
A_55_P2020602	NA	Pacsin1	protein kinase C and casein kinase substrate in neurons 1	23969	ENSMUSG00000040276
A_51_P505322	NA	Mpnd	MPN domain containing	68047	ENSMUSG00000003199
A_52_P667287	NA	Lass6	LAG1 homolog, ceramide synthase 6	241447	ENSMUSG00000027035
A_55_P2122605	NA	Cbr2	carbonyl reductase 2	12409	ENSMUSG00000025150
A_55_P2122604	NA	Cbr2	carbonyl reductase 2	12409	ENSMUSG00000025150
A_55_P1959238	NA	Nagk	N-acetylglucosamine kinase	56174	ENSMUSG00000034744
A_55_P1965876	NA	Opn1mw	opsin 1 (cone pigments), medium-wave-sensitive (color blindness, deutan)	14539	ENSMUSG00000031394
A_65_P09523	NA	Scrn3	secernin 3	74616	ENSMUSG00000008226
A_52_P356204	NA	Nostrin	nitric oxide synthase trafficker	329416	ENSMUSG00000034738
A_55_P2152962	NA	Mtr	5-methyltetrahydrofolate-homocysteine methyltransferase	238505	ENSMUSG00000021311
A_51_P451075	NA	Atp2a2	ATPase, Ca++ transporting, cardiac muscle, slow twitch 2	11938	ENSMUSG00000029467
A_55_P2162807	NA	Pla2g2e	phospholipase A2, group IIE	26970	ENSMUSG00000028751
A_66_P113008	NA	Pla2g2e	phospholipase A2, group IIE	26970	ENSMUSG00000028751
A_55_P2174967	NA	Elac2	elaC homolog 2 (E. coli)	68626	ENSMUSG00000020549
A_55_P2097178	NA	Idua	iduronidase, alpha-L-	15932	ENSMUSG00000033540
A_55_P2017312	NA	Eapp	E2F-associated phosphoprotein	66266	ENSMUSG00000054302
A_52_P649285	NA	Cdc26	cell division cycle 26	66440	ENSMUSG00000066149
A_51_P408584	NA	Enpp1	ectonucleotide pyrophosphatase/phosphodiesterase 1	18605	ENSMUSG00000037370
A_52_P223521	NA	Brwd1	bromodomain and WD repeat domain containing 1	93871	ENSMUSG00000022914
A_51_P506045	NA	Pgcp	plasma glutamate carboxypeptidase	54381	ENSMUSG00000039007
A_55_P2008790	NA	Zfp30	zinc finger protein 30	22693	ENSMUSG00000047473
A_55_P2041529	NA	Eya4	eyes absent 4 homolog (Drosophila)	14051	ENSMUSG00000010461
A_55_P2151556	NA	C8g	complement component 8, gamma polypeptide	69379	ENSMUSG00000015083
A_55_P1988058	NA	Tyw3	tRNA-yW synthesizing protein 3 homolog (S. cerevisiae)	209584	ENSMUSG00000047583
A_55_P1979620	NA	Eif3h	eukaryotic translation initiation factor 3, subunit H	68135	ENSMUSG00000022312
A_51_P339822	NA	Arhgap4	Rho GTPase activating protein 4	171207	ENSMUSG00000031389
A_55_P2130501	NA	Fndc1	fibronectin type III domain containing 1	68655	ENSMUSG00000071984
A_55_P2143119	NA	Ddx39b	DEAD (Asp-Glu-Ala-Asp) box polypeptide 39B	53817	ENSMUSG00000019432
A_51_P129149	NA	Gatad2a	GATA zinc finger domain containing 2A	234366	ENSMUSG00000036180
A_55_P2020050	NA	Itga6	integrin alpha 6	16403	ENSMUSG00000027111
A_55_P2007646	NA	Cryaa	crystallin, alpha A	12954	ENSMUSG00000024041
A_51_P474454	NA	Rnaseh2b	ribonuclease H2, subunit B	67153	ENSMUSG00000021932
A_52_P76402	NA	Eif2c1	eukaryotic translation initiation factor 2C, 1	236511	ENSMUSG00000041530
A_55_P1997424	NA	Cwc22	CWC22 spliceosome-associated protein homolog (S. cerevisiae)	80744	ENSMUSG00000027014
A_52_P20357	NA	Aqr	aquarius	11834	ENSMUSG00000040383
A_52_P45797	NA	Trmt10a	tRNA methyltransferase 10 homolog A (S. cerevisiae)	108943	ENSMUSG00000004127
A_51_P328968	NA	Zfp322a	zinc finger protein 322A	218100	ENSMUSG00000046351
A_51_P223575	NA	Tbc1d23	TBC1 domain family, member 23	67581	ENSMUSG00000022749
A_55_P1954945	NA	Lyg1	lysozyme G-like 1	69541	ENSMUSG00000026085
A_51_P428742	NA	Pus7l	pseudouridylate synthase 7 homolog (S. cerevisiae)-like	78895	ENSMUSG00000033356
A_51_P189943	NA	Dscam	Down syndrome cell adhesion molecule	13508	ENSMUSG00000050272
A_51_P284823	NA	Polr1b	polymerase (RNA) I polypeptide B	20017	ENSMUSG00000027395
A_55_P1969058	NA	Epha7	Eph receptor A7	13841	ENSMUSG00000028289
A_55_P2075200	NA	Tor3a	torsin family 3, member A	30935	ENSMUSG00000060519
A_51_P370470	NA	Cyp20a1	cytochrome P450, family 20, subfamily a, polypeptide 1	77951	ENSMUSG00000049439
A_51_P438952	NA	Bag4	BCL2-associated athanogene 4	67384	ENSMUSG00000037316
A_55_P2066230	NA	Hck	hemopoietic cell kinase	15162	ENSMUSG00000003283
A_55_P2073647	NA	Elp2	elongator acetyltransferase complex subunit 2	58523	ENSMUSG00000024271
A_55_P2171413	NA	Me1	malic enzyme 1, NADP(+)-dependent, cytosolic	17436	ENSMUSG00000032418
A_55_P2009952	NA	Me1	malic enzyme 1, NADP(+)-dependent, cytosolic	17436	ENSMUSG00000032418
A_55_P2059337	NA	Fastk	Fas-activated serine/threonine kinase	66587	ENSMUSG00000028959
A_51_P327188	NA	Senp1	SUMO1/sentrin specific peptidase 1	223870	ENSMUSG00000033075
A_52_P575771	NA	Mtfr1	mitochondrial fission regulator 1	67472	ENSMUSG00000027601
A_55_P1977473	NA	Dab2	disabled 2, mitogen-responsive phosphoprotein	13132	ENSMUSG00000022150
A_52_P470466	NA	D3Bwg0562e	DNA segment, Chr 3, Brigham & Women's Genetics 0562 expressed	229791	ENSMUSG00000044667
A_55_P2104327	NA	Pxdn	peroxidasin homolog (Drosophila)	69675	ENSMUSG00000020674
A_55_P2122200	NA	Prkar2b	protein kinase, cAMP dependent regulatory, type II beta	19088	ENSMUSG00000002997
A_55_P2110185	NA	Echdc1	enoyl Coenzyme A hydratase domain containing 1	52665	ENSMUSG00000019883
A_51_P436483	NA	Kin	antigenic determinant of rec-A protein	16588	ENSMUSG00000037262
A_52_P48546	NA	Rnf41	ring finger protein 41	67588	ENSMUSG00000025373
A_52_P508974	NA	Igf2bp3	insulin-like growth factor 2 mRNA binding protein 3	140488	ENSMUSG00000029814
A_51_P122141	NA	Mamstr	MEF2 activating motif and SAP domain containing transcriptional regulator	74490	ENSMUSG00000042918
A_51_P156158	NA	Phlpp1	PH domain and leucine rich repeat protein phosphatase 1	98432	ENSMUSG00000044340
A_51_P396385	NA	Mars2	methionine-tRNA synthetase 2 (mitochondrial)	212679	ENSMUSG00000046994
A_66_P139159	NA	Hras1	Harvey rat sarcoma virus oncogene 1	15461	ENSMUSG00000025499
A_55_P2013858	NA	Acad8	acyl-Coenzyme A dehydrogenase family, member 8	66948	ENSMUSG00000031969
A_55_P2097393	NA	Txndc8	thioredoxin domain containing 8	67402	ENSMUSG00000038709
A_55_P1996299	NA	Pofut1	protein O-fucosyltransferase 1	140484	ENSMUSG00000046020
A_55_P2054315	NA	Mcpt2	mast cell protease 2	17225	ENSMUSG00000022226
A_51_P235687	NA	Alox5ap	arachidonate 5-lipoxygenase activating protein	11690	ENSMUSG00000060063
A_51_P484842	NA	Asgr2	asialoglycoprotein receptor 2	11890	ENSMUSG00000040963
A_51_P155174	NA	Zfp672	zinc finger protein 672	319475	ENSMUSG00000049755
A_52_P510119	NA	Pgm2l1	phosphoglucomutase 2-like 1	70974	ENSMUSG00000030729
A_52_P86073	NA	Mrpl1	mitochondrial ribosomal protein L1	94061	ENSMUSG00000029486
A_55_P2165239	NA	Abl1	c-abl oncogene 1, non-receptor tyrosine kinase	11350	ENSMUSG00000026842
A_55_P2112120	NA	Tnk2	tyrosine kinase, non-receptor, 2	51789	ENSMUSG00000022791
A_55_P2151689	NA	Traf6	TNF receptor-associated factor 6	22034	ENSMUSG00000027164
A_52_P235278	NA	Pms1	postmeiotic segregation increased 1 (S. cerevisiae)	227099	ENSMUSG00000026098
A_66_P105307	NA	Adnp	activity-dependent neuroprotective protein	11538	ENSMUSG00000051149
A_65_P18981	NA	Palb2	partner and localizer of BRCA2	233826	ENSMUSG00000044702
A_55_P2017755	NA	Aldh16a1	aldehyde dehydrogenase 16 family, member A1	69748	ENSMUSG00000007833
A_55_P2051313	NA	Gstk1	glutathione S-transferase kappa 1	76263	ENSMUSG00000029864
A_55_P2100715	NA	Auh	AU RNA binding protein/enoyl-coenzyme A hydratase	11992	ENSMUSG00000021460
A_55_P2069885	NA	Slc50a1	solute carrier family 50 (sugar transporter), member 1	19729	ENSMUSG00000027953
A_55_P2000027	NA	Spink2	serine peptidase inhibitor, Kazal type 2	69982	ENSMUSG00000053030
A_55_P1973267	NA	Ddhd2	DDHD domain containing 2	72108	ENSMUSG00000061313
A_55_P1957249	NA	Pdgfrb	platelet derived growth factor receptor, beta polypeptide	18596	ENSMUSG00000024620
A_55_P1954835	NA	Ramp3	receptor (calcitonin) activity modifying protein 3	56089	ENSMUSG00000041046
A_55_P2101340	NA	Ramp3	receptor (calcitonin) activity modifying protein 3	56089	ENSMUSG00000041046
A_51_P481159	NA	Cbr3	carbonyl reductase 3	109857	ENSMUSG00000022947
A_51_P509669	NA	Uap1l1	UDP-N-acteylglucosamine pyrophosphorylase 1-like 1	227620	ENSMUSG00000026956
A_55_P2155002	NA	Ccdc23	coiled-coil domain containing 23	69216	ENSMUSG00000028643
A_55_P1999309	NA	Zfp668	zinc finger protein 668	244219	ENSMUSG00000049728
A_55_P2033507	NA	Ltbp4	latent transforming growth factor beta binding protein 4	108075	ENSMUSG00000040488
A_55_P1957319	NA	Krr1	KRR1, small subunit (SSU) processome component, homolog (yeast)	52705	ENSMUSG00000063334
A_55_P2166501	NA	Cd44	CD44 antigen	12505	ENSMUSG00000005087
A_55_P2154709	NA	Pter	phosphotriesterase related	19212	ENSMUSG00000026730
A_55_P2015687	NA	D14Ertd668e	DNA segment, Chr 14, ERATO Doi 668, expressed	219132	ENSMUSG00000068245
A_55_P2104835	NA	P2rx4	purinergic receptor P2X, ligand-gated ion channel 4	18438	ENSMUSG00000029470
A_51_P229655	NA	Acsm5	acyl-CoA synthetase medium-chain family member 5	272428	ENSMUSG00000030972
A_51_P176071	NA	Ftsjd1	FtsJ methyltransferase domain containing 1	234728	ENSMUSG00000046441
biological process	single-organism metabolic process	GO:0044710
C=8434;O=268;E=209.98;R=1.28;rawP=4.28e-07;adjP=0.0004
A_52_P478236	NA	Wrn	Werner syndrome homolog (human)	22427	ENSMUSG00000031583
A_55_P2149269	NA	Galt	galactose-1-phosphate uridyl transferase	14430	ENSMUSG00000036073
A_55_P1998354	NA	Wbp4	WW domain binding protein 4	22380	ENSMUSG00000022023
A_55_P1954569	NA	Hmgcs1	3-hydroxy-3-methylglutaryl-Coenzyme A synthase 1	208715	ENSMUSG00000093930
A_55_P2012552	NA	Nap1l5	nucleosome assembly protein 1-like 5	58243	ENSMUSG00000055430
A_55_P2078084	NA	Gm13011	predicted gene 13011	242711	ENSMUSG00000078520
A_55_P2031466	NA	Lrrc32	leucine rich repeat containing 32	434215	ENSMUSG00000090958
A_55_P1994194	NA	Heph	hephaestin	15203	ENSMUSG00000031209
A_55_P2074366	NA	Yars	tyrosyl-tRNA synthetase	107271	ENSMUSG00000028811
A_55_P2324712	NA	Dmrt1	doublesex and mab-3 related transcription factor 1	50796	ENSMUSG00000024837
A_55_P2061094	NA	Fnta	farnesyltransferase, CAAX box, alpha	14272	ENSMUSG00000015994
A_66_P107038	NA	Prcp	prolylcarboxypeptidase (angiotensinase C)	72461	ENSMUSG00000061119
A_51_P379710	NA	Rpn1	ribophorin I	103963	ENSMUSG00000030062
A_55_P2016346	NA	Eif3d	eukaryotic translation initiation factor 3, subunit D	55944	ENSMUSG00000016554
A_55_P2237129	NA	St6galnac5	ST6 (alpha-N-acetyl-neuraminyl-2,3-beta-galactosyl-1,3)-N-acetylgalactosaminide alpha-2,6-sialyltransferase 5	26938	ENSMUSG00000039037
A_55_P1966755	NA	Cyp2r1	cytochrome P450, family 2, subfamily r, polypeptide 1	244209	ENSMUSG00000030670
A_51_P424532	NA	Vnn1	vanin 1	22361	ENSMUSG00000037440
A_55_P2037712	NA	Smc4	structural maintenance of chromosomes 4	70099	ENSMUSG00000034349
A_66_P123683	NA	Nabp1	nucleic acid binding protein 1	109019	ENSMUSG00000026107
A_51_P506683	NA	Fbxw7	F-box and WD-40 domain protein 7	50754	ENSMUSG00000028086
A_52_P612382	NA	Cdc25b	cell division cycle 25B	12531	ENSMUSG00000027330
A_55_P2177899	NA	Dact1	dapper homolog 1, antagonist of beta-catenin (xenopus)	59036	ENSMUSG00000044548
A_55_P2123727	NA	Grb2	growth factor receptor bound protein 2	14784	ENSMUSG00000059923
A_55_P2013569	NA	Agbl4	ATP/GTP binding protein-like 4	78933	ENSMUSG00000061298
A_51_P180452	NA	Crk	v-crk sarcoma virus CT10 oncogene homolog (avian)	12928	ENSMUSG00000017776
A_55_P2008452	NA	Wtap	Wilms' tumour 1-associating protein	60532	ENSMUSG00000060475
A_55_P2106922	NA	Arfgap3	ADP-ribosylation factor GTPase activating protein 3	66251	ENSMUSG00000054277
A_55_P2120956	NA	Arfgap3	ADP-ribosylation factor GTPase activating protein 3	66251	ENSMUSG00000054277
A_51_P432851	NA	Dhrs11	dehydrogenase/reductase (SDR family) member 11	192970	ENSMUSG00000034449
A_52_P385536	NA	Ddx58	DEAD (Asp-Glu-Ala-Asp) box polypeptide 58	230073	ENSMUSG00000040296
A_51_P443293	NA	Decr2	2-4-dienoyl-Coenzyme A reductase 2, peroxisomal	26378	ENSMUSG00000036775
A_51_P450169	NA	Dnajb13	DnaJ (Hsp40) related, subfamily B, member 13	69387	ENSMUSG00000030708
A_52_P745	NA	Acox3	acyl-Coenzyme A oxidase 3, pristanoyl	80911	ENSMUSG00000029098
A_51_P343913	NA	Parp4	poly (ADP-ribose) polymerase family, member 4	328417	ENSMUSG00000054509
A_51_P234544	NA	Azin1	antizyme inhibitor 1	54375	ENSMUSG00000037458
A_55_P2130256	NA	Polr2l	polymerase (RNA) II (DNA directed) polypeptide L	66491	ENSMUSG00000038489
A_52_P483129	NA	Utp23	UTP23, small subunit (SSU) processome component, homolog (yeast)	78581	ENSMUSG00000022313
A_51_P425824	NA	Fam132a	family with sequence similarity 132, member A	67389	ENSMUSG00000023571
A_55_P2053241	NA	Gng4	guanine nucleotide binding protein (G protein), gamma 4	14706	ENSMUSG00000021303
A_55_P2015520	NA	Plekha1	pleckstrin homology domain containing, family A (phosphoinositide binding specific) member 1	101476	ENSMUSG00000040268
A_55_P2156855	NA	Car13	carbonic anhydrase 13	71934	ENSMUSG00000027555
A_55_P2035667	NA	Gyk	glycerol kinase	14933	ENSMUSG00000025059
A_52_P585699	NA	Ciao1	cytosolic iron-sulfur protein assembly 1	26371	ENSMUSG00000003662
A_55_P2103060	NA	Pxk	PX domain containing serine/threonine kinase	218699	ENSMUSG00000033885
A_55_P2071466	NA	Ncf1	neutrophil cytosolic factor 1	17969	ENSMUSG00000015950
A_55_P1957739	NA	Guca2b	guanylate cyclase activator 2b (retina)	14916	ENSMUSG00000032978
A_52_P179068	NA	Gucy1b3	guanylate cyclase 1, soluble, beta 3	54195	ENSMUSG00000028005
A_55_P2046793	NA	Eogt	EGF domain-specific O-linked N-acetylglucosamine (GlcNAc) transferase	101351	ENSMUSG00000035245
A_52_P270145	NA	Zfp329	zinc finger protein 329	67230	ENSMUSG00000057894
A_55_P2049252	NA	Mapkapk5	MAP kinase-activated protein kinase 5	17165	ENSMUSG00000029454
A_51_P518488	NA	Atpif1	ATPase inhibitory factor 1	11983	ENSMUSG00000054428
A_51_P483473	NA	St3gal5	ST3 beta-galactoside alpha-2,3-sialyltransferase 5	20454	ENSMUSG00000056091
A_55_P2138956	NA	Tpk1	thiamine pyrophosphokinase	29807	ENSMUSG00000029735
A_51_P106952	NA	Rbm26	RNA binding motif protein 26	74213	ENSMUSG00000022119
A_55_P2080130	NA	Aim2	absent in melanoma 2	383619	ENSMUSG00000037860
A_55_P1995404	NA	Cd59b	CD59b antigen	333883	ENSMUSG00000068686
A_52_P494115	NA	Gatad2b	GATA zinc finger domain containing 2B	229542	ENSMUSG00000042390
A_55_P1953961	NA	Cdkl3	cyclin-dependent kinase-like 3	213084	ENSMUSG00000020389
A_55_P2142439	NA	Echdc2	enoyl Coenzyme A hydratase domain containing 2	52430	ENSMUSG00000028601
A_51_P483280	NA	Prnp	prion protein	19122	ENSMUSG00000079037
A_66_P105175	NA	Bche	butyrylcholinesterase	12038	ENSMUSG00000027792
A_52_P500002	NA	Tspyl5	testis-specific protein, Y-encoded-like 5	239364	ENSMUSG00000038984
A_55_P2081616	NA	Timeless	timeless homolog (Drosophila)	21853	ENSMUSG00000039994
A_55_P1982585	NA	Kdm4a	lysine (K)-specific demethylase 4A	230674	ENSMUSG00000033326
A_55_P2084332	NA	Pigp	phosphatidylinositol glycan anchor biosynthesis, class P	56176	ENSMUSG00000022940
A_55_P1962946	NA	Syk	spleen tyrosine kinase	20963	ENSMUSG00000021457
A_55_P2147220	NA	Ak2	adenylate kinase 2	11637	ENSMUSG00000028792
A_51_P117226	NA	Zdhhc2	zinc finger, DHHC domain containing 2	70546	ENSMUSG00000039470
A_52_P651248	NA	Zdhhc2	zinc finger, DHHC domain containing 2	70546	ENSMUSG00000039470
A_55_P2148082	NA	Larp7	La ribonucleoprotein domain family, member 7	28036	ENSMUSG00000027968
A_55_P1958447	NA	Prepl	prolyl endopeptidase-like	213760	ENSMUSG00000024127
A_52_P491073	NA	Nek8	NIMA (never in mitosis gene a)-related expressed kinase 8	140859	ENSMUSG00000017405
A_51_P329818	NA	Dpep3	dipeptidase 3	71854	ENSMUSG00000031898
A_51_P388374	NA	Ppil4	peptidylprolyl isomerase (cyclophilin)-like 4	67418	ENSMUSG00000015757
A_55_P1991851	NA	Speg	SPEG complex locus	11790	ENSMUSG00000026207
A_55_P2060498	NA	Zfp553	zinc finger protein 553	233887	ENSMUSG00000045598
A_55_P2031636	NA	Igf1	insulin-like growth factor 1	16000	ENSMUSG00000020053
A_55_P1976690	NA	Snrnp35	small nuclear ribonucleoprotein 35 (U11/U12)	76167	ENSMUSG00000029402
A_52_P85765	NA	Stard6	StAR-related lipid transfer (START) domain containing 6	170461	ENSMUSG00000079608
A_55_P2040777	NA	Lipo1	lipase, member O1	381236	ENSMUSG00000024766
A_65_P08971	NA	F3	coagulation factor III	14066	ENSMUSG00000028128
A_55_P1990849	NA	Dclre1b	DNA cross-link repair 1B, PSO2 homolog (S. cerevisiae)	140917	ENSMUSG00000027845
A_51_P150120	NA	Mgst2	microsomal glutathione S-transferase 2	211666	ENSMUSG00000074604
A_55_P2144766	NA	Pigc	phosphatidylinositol glycan anchor biosynthesis, class C	67292	ENSMUSG00000026698
A_55_P2011545	NA	Pyroxd1	pyridine nucleotide-disulphide oxidoreductase domain 1	232491	ENSMUSG00000041671
A_55_P1953919	NA	Me3	malic enzyme 3, NADP(+)-dependent, mitochondrial	109264	ENSMUSG00000030621
A_52_P537852	NA	Fam120b	family with sequence similarity 120B	67544	ENSMUSG00000014763
A_55_P2130610	NA	Smc3	structural maintenance of chromosomes 3	13006	ENSMUSG00000024974
A_55_P2051914	NA	Zfp568	zinc finger protein 568	243905	ENSMUSG00000074221
A_55_P2119463	NA	Ggh	gamma-glutamyl hydrolase	14590	ENSMUSG00000073987
A_66_P134090	NA	Grpel2	GrpE-like 2, mitochondrial	17714	ENSMUSG00000024580
A_55_P1987730	NA	5730469M10Rik	RIKEN cDNA 5730469M10 gene	70564	ENSMUSG00000021792
A_55_P1981050	NA	Gemin8	gem (nuclear organelle) associated protein 8	237221	ENSMUSG00000040621
A_66_P123787	NA	Lars2	leucyl-tRNA synthetase, mitochondrial	102436	ENSMUSG00000035202
A_55_P2074631	NA	Cpeb1	cytoplasmic polyadenylation element binding protein 1	12877	ENSMUSG00000025586
A_55_P2075127	NA	Pax2	paired box gene 2	18504	ENSMUSG00000004231
A_55_P2049388	NA	Zfp28	zinc finger protein 28	22690	ENSMUSG00000062861
A_52_P427240	NA	Ltn1	listerin E3 ubiquitin protein ligase 1	78913	ENSMUSG00000052299
A_51_P444437	NA	Ptgr1	prostaglandin reductase 1	67103	ENSMUSG00000028378
A_51_P466221	NA	Amhr2	anti-Mullerian hormone type 2 receptor	110542	ENSMUSG00000023047
A_55_P1996674	NA	Itih3	inter-alpha trypsin inhibitor, heavy chain 3	16426	ENSMUSG00000006522
A_52_P156190	NA	Ednra	endothelin receptor type A	13617	ENSMUSG00000031616
A_55_P2185950	NA	Bpnt1	bisphosphate 3'-nucleotidase 1	23827	ENSMUSG00000026617
A_55_P2051778	NA	Sult2b1	sulfotransferase family, cytosolic, 2B, member 1	54200	ENSMUSG00000003271
A_55_P2120433	NA	Wdr12	WD repeat domain 12	57750	ENSMUSG00000026019
A_55_P2003483	NA	Gldc	glycine decarboxylase	104174	ENSMUSG00000024827
A_51_P340402	NA	Eefsec	eukaryotic elongation factor, selenocysteine-tRNA-specific	65967	ENSMUSG00000033216
A_55_P2379599	NA	Asph	aspartate-beta-hydroxylase	65973	ENSMUSG00000028207
A_55_P2076288	NA	Zfp661	zinc finger protein 661	72180	ENSMUSG00000034800
A_55_P2124425	NA	Zfp661	zinc finger protein 661	72180	ENSMUSG00000034800
A_55_P2034260	NA	Ctdsp1	CTD (carboxy-terminal domain, RNA polymerase II, polypeptide A) small phosphatase 1	227292	ENSMUSG00000026176
A_51_P491051	NA	Ints9	integrator complex subunit 9	210925	ENSMUSG00000021975
A_55_P2158483	NA	Nkiras2	NFKB inhibitor interacting Ras-like protein 2	71966	ENSMUSG00000017837
A_52_P359502	NA	Pdxk	pyridoxal (pyridoxine, vitamin B6) kinase	216134	ENSMUSG00000032788
A_52_P459929	NA	Itga1	integrin alpha 1	109700	ENSMUSG00000042284
A_51_P201480	NA	Stat3	signal transducer and activator of transcription 3	20848	ENSMUSG00000004040
A_51_P511899	NA	Mthfsd	methenyltetrahydrofolate synthetase domain containing	234814	ENSMUSG00000031816
A_51_P104933	NA	Trub2	TruB pseudouridine (psi) synthase homolog 2 (E. coli)	227682	ENSMUSG00000039826
A_55_P1986351	NA	D630037F22Rik	RIKEN cDNA D630037F22 gene	544696	ENSMUSG00000038122
A_52_P136709	NA	Pctp	phosphatidylcholine transfer protein	18559	ENSMUSG00000020553
A_51_P452768	NA	Cyp4f14	cytochrome P450, family 4, subfamily f, polypeptide 14	64385	ENSMUSG00000024292
A_55_P2067116	NA	Dclre1c	DNA cross-link repair 1C, PSO2 homolog (S. cerevisiae)	227525	ENSMUSG00000026648
A_55_P1953723	NA	Rab13	RAB13, member RAS oncogene family	68328	ENSMUSG00000027935
A_51_P447668	NA	Ptpn12	protein tyrosine phosphatase, non-receptor type 12	19248	ENSMUSG00000028771
A_65_P19112	NA	Zfp397	zinc finger protein 397	69256	ENSMUSG00000024276
A_55_P2044463	NA	Lipt2	lipoyl(octanoyl) transferase 2 (putative)	67164	ENSMUSG00000030725
A_55_P2159830	NA	Yaf2	YY1 associated factor 2	67057	ENSMUSG00000022634
A_55_P2118799	NA	Rmi1	RMI1, RecQ mediated genome instability 1, homolog (S. cerevisiae)	74386	ENSMUSG00000035367
A_51_P178828	NA	Mbl2	mannose-binding lectin (protein C) 2	17195	ENSMUSG00000024863
A_55_P1961140	NA	Mettl3	methyltransferase like 3	56335	ENSMUSG00000022160
A_55_P2097729	NA	Gtpbp4	GTP binding protein 4	69237	ENSMUSG00000021149
A_51_P505662	NA	4933437F05Rik	RIKEN cDNA 4933437F05 gene	71275	ENSMUSG00000072919
A_66_P106836	NA	Kmo	kynurenine 3-monooxygenase (kynurenine 3-hydroxylase)	98256	ENSMUSG00000039783
A_55_P2045792	NA	Pes1	pescadillo homolog 1, containing BRCT domain (zebrafish)	64934	ENSMUSG00000020430
A_51_P289742	NA	Slc27a5	solute carrier family 27 (fatty acid transporter), member 5	26459	ENSMUSG00000030382
A_55_P2117903	NA	Stard5	StAR-related lipid transfer (START) domain containing 5	170460	ENSMUSG00000046027
A_51_P232858	NA	Rpl14	ribosomal protein L14	67115	ENSMUSG00000025794
A_51_P235440	NA	Pelp1	proline, glutamic acid and leucine rich protein 1	75273	ENSMUSG00000018921
A_55_P1966878	NA	Rnaseh2a	ribonuclease H2, large subunit	69724	ENSMUSG00000052926
A_51_P379083	NA	Adam24	a disintegrin and metallopeptidase domain 24 (testase 1)	13526	ENSMUSG00000046723
A_51_P400463	NA	Agmat	agmatine ureohydrolase (agmatinase)	75986	ENSMUSG00000040706
A_55_P2120615	NA	Ssh3	slingshot homolog 3 (Drosophila)	245857	ENSMUSG00000034616
A_52_P52156	NA	Isoc2a	isochorismatase domain containing 2a	664994	ENSMUSG00000086784
A_51_P441469	NA	Jmy	junction-mediating and regulatory protein	57748	ENSMUSG00000021690
A_55_P2151609	NA	Sorl1	sortilin-related receptor, LDLR class A repeats-containing	20660	ENSMUSG00000049313
A_55_P1970299	NA	Mttp	microsomal triglyceride transfer protein	17777	ENSMUSG00000028158
A_52_P211418	NA	G2e3	G2/M-phase specific E3 ubiquitin ligase	217558	ENSMUSG00000035293
A_55_P2107957	NA	Fam175a	family with sequence similarity 175, member A	70681	ENSMUSG00000035234
A_52_P439263	NA	Ugt8a	UDP galactosyltransferase 8A	22239	ENSMUSG00000032854
A_51_P362738	NA	Dusp18	dual specificity phosphatase 18	75219	ENSMUSG00000047205
A_55_P1992319	NA	Col4a3bp	collagen, type IV, alpha 3 (Goodpasture antigen) binding protein	68018	ENSMUSG00000021669
A_55_P2001458	NA	Zscan29	zinc finger SCAN domains 29	99334	ENSMUSG00000050619
A_52_P249920	NA	Zscan29	zinc finger SCAN domains 29	99334	ENSMUSG00000050619
A_52_P266530	NA	Ide	insulin degrading enzyme	15925	ENSMUSG00000056999
A_51_P350048	NA	Gstt2	glutathione S-transferase, theta 2	14872	ENSMUSG00000033318
A_51_P334789	NA	Nudt16	nudix (nucleoside diphosphate linked moiety X)-type motif 16	75686	ENSMUSG00000032565
A_52_P556082	NA	Trmt2b	TRM2 tRNA methyltransferase 2 homolog B (S. cerevisiae)	215201	ENSMUSG00000067369
A_51_P394115	NA	Aadac	arylacetamide deacetylase (esterase)	67758	ENSMUSG00000027761
A_52_P467046	NA	Wdr48	WD repeat domain 48	67561	ENSMUSG00000032512
A_51_P108659	NA	Pon1	paraoxonase 1	18979	ENSMUSG00000002588
A_55_P1963031	NA	Ampd2	adenosine monophosphate deaminase 2	109674	ENSMUSG00000027889
A_51_P412809	NA	Dqx1	DEAQ RNA-dependent ATPase	93838	ENSMUSG00000009145
A_51_P448814	NA	Zfp90	zinc finger protein 90	22751	ENSMUSG00000031907
A_55_P1984023	NA	Arrb2	arrestin, beta 2	216869	ENSMUSG00000060216
A_51_P510764	NA	Agmo	alkylglycerol monooxygenase	319660	ENSMUSG00000050103
A_55_P1972054	NA	Capn10	calpain 10	23830	ENSMUSG00000026270
A_55_P1992329	NA	Gmpr	guanosine monophosphate reductase	66355	ENSMUSG00000000253
A_55_P2137431	NA	Rtel1	regulator of telomere elongation helicase 1	269400	ENSMUSG00000038685
A_55_P2141943	NA	Ube2l6	ubiquitin-conjugating enzyme E2L 6	56791	ENSMUSG00000027078
A_55_P2114596	NA	Zfp161	zinc finger protein 161	22666	ENSMUSG00000049672
A_55_P2093163	NA	Zfp161	zinc finger protein 161	22666	ENSMUSG00000049672
A_51_P314161	NA	Qtrt1	queuine tRNA-ribosyltransferase 1	60507	ENSMUSG00000002825
A_55_P2055257	NA	Maoa	monoamine oxidase A	17161	ENSMUSG00000025037
A_52_P191086	NA	Kcnj6	potassium inwardly-rectifying channel, subfamily J, member 6	16522	ENSMUSG00000043301
A_51_P461429	NA	Cyp7b1	cytochrome P450, family 7, subfamily b, polypeptide 1	13123	ENSMUSG00000039519
A_55_P1975140	NA	Acvr1c	activin A receptor, type IC	269275	ENSMUSG00000026834
A_55_P2064203	NA	Acvr1c	activin A receptor, type IC	269275	ENSMUSG00000026834
A_51_P476261	NA	Zfp120	zinc finger protein 120	104348	ENSMUSG00000068134
A_55_P2002727	NA	Inpp4a	inositol polyphosphate-4-phosphatase, type I	269180	ENSMUSG00000026113
A_52_P559919	NA	Eif2ak2	eukaryotic translation initiation factor 2-alpha kinase 2	19106	ENSMUSG00000024079
A_55_P2060107	NA	Pkm	pyruvate kinase, muscle	18746	ENSMUSG00000032294
A_55_P2134496	NA	Amfr	autocrine motility factor receptor	23802	ENSMUSG00000031751
A_55_P2146314	NA	Lmx1a	LIM homeobox transcription factor 1 alpha	110648	ENSMUSG00000026686
A_52_P359965	NA	Cpd	carboxypeptidase D	12874	ENSMUSG00000020841
A_51_P285779	NA	Asphd2	aspartate beta-hydroxylase domain containing 2	72898	ENSMUSG00000029348
A_51_P505322	NA	Mpnd	MPN domain containing	68047	ENSMUSG00000003199
A_52_P667287	NA	Lass6	LAG1 homolog, ceramide synthase 6	241447	ENSMUSG00000027035
A_55_P2122605	NA	Cbr2	carbonyl reductase 2	12409	ENSMUSG00000025150
A_55_P2122604	NA	Cbr2	carbonyl reductase 2	12409	ENSMUSG00000025150
A_55_P1959238	NA	Nagk	N-acetylglucosamine kinase	56174	ENSMUSG00000034744
A_55_P1965876	NA	Opn1mw	opsin 1 (cone pigments), medium-wave-sensitive (color blindness, deutan)	14539	ENSMUSG00000031394
A_65_P09523	NA	Scrn3	secernin 3	74616	ENSMUSG00000008226
A_52_P356204	NA	Nostrin	nitric oxide synthase trafficker	329416	ENSMUSG00000034738
A_55_P2152962	NA	Mtr	5-methyltetrahydrofolate-homocysteine methyltransferase	238505	ENSMUSG00000021311
A_51_P451075	NA	Atp2a2	ATPase, Ca++ transporting, cardiac muscle, slow twitch 2	11938	ENSMUSG00000029467
A_55_P2162807	NA	Pla2g2e	phospholipase A2, group IIE	26970	ENSMUSG00000028751
A_66_P113008	NA	Pla2g2e	phospholipase A2, group IIE	26970	ENSMUSG00000028751
A_55_P2174967	NA	Elac2	elaC homolog 2 (E. coli)	68626	ENSMUSG00000020549
A_55_P2017312	NA	Eapp	E2F-associated phosphoprotein	66266	ENSMUSG00000054302
A_55_P2097178	NA	Idua	iduronidase, alpha-L-	15932	ENSMUSG00000033540
A_52_P649285	NA	Cdc26	cell division cycle 26	66440	ENSMUSG00000066149
A_51_P408584	NA	Enpp1	ectonucleotide pyrophosphatase/phosphodiesterase 1	18605	ENSMUSG00000037370
A_52_P223521	NA	Brwd1	bromodomain and WD repeat domain containing 1	93871	ENSMUSG00000022914
A_51_P506045	NA	Pgcp	plasma glutamate carboxypeptidase	54381	ENSMUSG00000039007
A_55_P2008790	NA	Zfp30	zinc finger protein 30	22693	ENSMUSG00000047473
A_55_P2041529	NA	Eya4	eyes absent 4 homolog (Drosophila)	14051	ENSMUSG00000010461
A_55_P2151556	NA	C8g	complement component 8, gamma polypeptide	69379	ENSMUSG00000015083
A_55_P1988058	NA	Tyw3	tRNA-yW synthesizing protein 3 homolog (S. cerevisiae)	209584	ENSMUSG00000047583
A_55_P1979620	NA	Eif3h	eukaryotic translation initiation factor 3, subunit H	68135	ENSMUSG00000022312
A_55_P2130501	NA	Fndc1	fibronectin type III domain containing 1	68655	ENSMUSG00000071984
A_55_P2143119	NA	Ddx39b	DEAD (Asp-Glu-Ala-Asp) box polypeptide 39B	53817	ENSMUSG00000019432
A_51_P339822	NA	Arhgap4	Rho GTPase activating protein 4	171207	ENSMUSG00000031389
A_51_P129149	NA	Gatad2a	GATA zinc finger domain containing 2A	234366	ENSMUSG00000036180
A_55_P2020050	NA	Itga6	integrin alpha 6	16403	ENSMUSG00000027111
A_55_P2007646	NA	Cryaa	crystallin, alpha A	12954	ENSMUSG00000024041
A_51_P474454	NA	Rnaseh2b	ribonuclease H2, subunit B	67153	ENSMUSG00000021932
A_52_P76402	NA	Eif2c1	eukaryotic translation initiation factor 2C, 1	236511	ENSMUSG00000041530
A_55_P1997424	NA	Cwc22	CWC22 spliceosome-associated protein homolog (S. cerevisiae)	80744	ENSMUSG00000027014
A_52_P20357	NA	Aqr	aquarius	11834	ENSMUSG00000040383
A_51_P328968	NA	Zfp322a	zinc finger protein 322A	218100	ENSMUSG00000046351
A_51_P223575	NA	Tbc1d23	TBC1 domain family, member 23	67581	ENSMUSG00000022749
A_55_P1954945	NA	Lyg1	lysozyme G-like 1	69541	ENSMUSG00000026085
A_51_P428742	NA	Pus7l	pseudouridylate synthase 7 homolog (S. cerevisiae)-like	78895	ENSMUSG00000033356
A_51_P284823	NA	Polr1b	polymerase (RNA) I polypeptide B	20017	ENSMUSG00000027395
A_55_P1969058	NA	Epha7	Eph receptor A7	13841	ENSMUSG00000028289
A_55_P2075200	NA	Tor3a	torsin family 3, member A	30935	ENSMUSG00000060519
A_51_P370470	NA	Cyp20a1	cytochrome P450, family 20, subfamily a, polypeptide 1	77951	ENSMUSG00000049439
A_51_P438952	NA	Bag4	BCL2-associated athanogene 4	67384	ENSMUSG00000037316
A_55_P2066230	NA	Hck	hemopoietic cell kinase	15162	ENSMUSG00000003283
A_55_P2073647	NA	Elp2	elongator acetyltransferase complex subunit 2	58523	ENSMUSG00000024271
A_55_P2171413	NA	Me1	malic enzyme 1, NADP(+)-dependent, cytosolic	17436	ENSMUSG00000032418
A_55_P2009952	NA	Me1	malic enzyme 1, NADP(+)-dependent, cytosolic	17436	ENSMUSG00000032418
A_55_P2059337	NA	Fastk	Fas-activated serine/threonine kinase	66587	ENSMUSG00000028959
A_51_P327188	NA	Senp1	SUMO1/sentrin specific peptidase 1	223870	ENSMUSG00000033075
A_52_P575771	NA	Mtfr1	mitochondrial fission regulator 1	67472	ENSMUSG00000027601
A_55_P1977473	NA	Dab2	disabled 2, mitogen-responsive phosphoprotein	13132	ENSMUSG00000022150
A_52_P470466	NA	D3Bwg0562e	DNA segment, Chr 3, Brigham & Women's Genetics 0562 expressed	229791	ENSMUSG00000044667
A_55_P2104327	NA	Pxdn	peroxidasin homolog (Drosophila)	69675	ENSMUSG00000020674
A_55_P2122200	NA	Prkar2b	protein kinase, cAMP dependent regulatory, type II beta	19088	ENSMUSG00000002997
A_51_P436483	NA	Kin	antigenic determinant of rec-A protein	16588	ENSMUSG00000037262
A_52_P508974	NA	Igf2bp3	insulin-like growth factor 2 mRNA binding protein 3	140488	ENSMUSG00000029814
A_52_P48546	NA	Rnf41	ring finger protein 41	67588	ENSMUSG00000025373
A_51_P122141	NA	Mamstr	MEF2 activating motif and SAP domain containing transcriptional regulator	74490	ENSMUSG00000042918
A_51_P156158	NA	Phlpp1	PH domain and leucine rich repeat protein phosphatase 1	98432	ENSMUSG00000044340
A_51_P396385	NA	Mars2	methionine-tRNA synthetase 2 (mitochondrial)	212679	ENSMUSG00000046994
A_55_P2013858	NA	Acad8	acyl-Coenzyme A dehydrogenase family, member 8	66948	ENSMUSG00000031969
A_66_P139159	NA	Hras1	Harvey rat sarcoma virus oncogene 1	15461	ENSMUSG00000025499
A_55_P2097393	NA	Txndc8	thioredoxin domain containing 8	67402	ENSMUSG00000038709
A_55_P1996299	NA	Pofut1	protein O-fucosyltransferase 1	140484	ENSMUSG00000046020
A_55_P2054315	NA	Mcpt2	mast cell protease 2	17225	ENSMUSG00000022226
A_51_P484842	NA	Asgr2	asialoglycoprotein receptor 2	11890	ENSMUSG00000040963
A_51_P235687	NA	Alox5ap	arachidonate 5-lipoxygenase activating protein	11690	ENSMUSG00000060063
A_51_P155174	NA	Zfp672	zinc finger protein 672	319475	ENSMUSG00000049755
A_52_P510119	NA	Pgm2l1	phosphoglucomutase 2-like 1	70974	ENSMUSG00000030729
A_52_P86073	NA	Mrpl1	mitochondrial ribosomal protein L1	94061	ENSMUSG00000029486
A_55_P2165239	NA	Abl1	c-abl oncogene 1, non-receptor tyrosine kinase	11350	ENSMUSG00000026842
A_55_P2112120	NA	Tnk2	tyrosine kinase, non-receptor, 2	51789	ENSMUSG00000022791
A_55_P2151689	NA	Traf6	TNF receptor-associated factor 6	22034	ENSMUSG00000027164
A_52_P235278	NA	Pms1	postmeiotic segregation increased 1 (S. cerevisiae)	227099	ENSMUSG00000026098
A_66_P105307	NA	Adnp	activity-dependent neuroprotective protein	11538	ENSMUSG00000051149
A_65_P18981	NA	Palb2	partner and localizer of BRCA2	233826	ENSMUSG00000044702
A_55_P2017755	NA	Aldh16a1	aldehyde dehydrogenase 16 family, member A1	69748	ENSMUSG00000007833
A_55_P2051313	NA	Gstk1	glutathione S-transferase kappa 1	76263	ENSMUSG00000029864
A_55_P2100715	NA	Auh	AU RNA binding protein/enoyl-coenzyme A hydratase	11992	ENSMUSG00000021460
A_55_P2069885	NA	Slc50a1	solute carrier family 50 (sugar transporter), member 1	19729	ENSMUSG00000027953
A_55_P1973267	NA	Ddhd2	DDHD domain containing 2	72108	ENSMUSG00000061313
A_55_P1957249	NA	Pdgfrb	platelet derived growth factor receptor, beta polypeptide	18596	ENSMUSG00000024620
A_55_P1954835	NA	Ramp3	receptor (calcitonin) activity modifying protein 3	56089	ENSMUSG00000041046
A_55_P2101340	NA	Ramp3	receptor (calcitonin) activity modifying protein 3	56089	ENSMUSG00000041046
A_51_P481159	NA	Cbr3	carbonyl reductase 3	109857	ENSMUSG00000022947
A_55_P2155002	NA	Ccdc23	coiled-coil domain containing 23	69216	ENSMUSG00000028643
A_55_P1999309	NA	Zfp668	zinc finger protein 668	244219	ENSMUSG00000049728
A_55_P2033507	NA	Ltbp4	latent transforming growth factor beta binding protein 4	108075	ENSMUSG00000040488
A_55_P1957319	NA	Krr1	KRR1, small subunit (SSU) processome component, homolog (yeast)	52705	ENSMUSG00000063334
A_55_P2166501	NA	Cd44	CD44 antigen	12505	ENSMUSG00000005087
A_55_P2015687	NA	D14Ertd668e	DNA segment, Chr 14, ERATO Doi 668, expressed	219132	ENSMUSG00000068245
A_55_P2104835	NA	P2rx4	purinergic receptor P2X, ligand-gated ion channel 4	18438	ENSMUSG00000029470
A_51_P229655	NA	Acsm5	acyl-CoA synthetase medium-chain family member 5	272428	ENSMUSG00000030972
biological process	organic substance metabolic process	GO:0071704
C=8093;O=255;E=201.49;R=1.27;rawP=2.36e-06;adjP=0.0014
A_52_P478236	NA	Wrn	Werner syndrome homolog (human)	22427	ENSMUSG00000031583
A_55_P2149269	NA	Galt	galactose-1-phosphate uridyl transferase	14430	ENSMUSG00000036073
A_55_P2118799	NA	Rmi1	RMI1, RecQ mediated genome instability 1, homolog (S. cerevisiae)	74386	ENSMUSG00000035367
A_51_P178828	NA	Mbl2	mannose-binding lectin (protein C) 2	17195	ENSMUSG00000024863
A_55_P1961140	NA	Mettl3	methyltransferase like 3	56335	ENSMUSG00000022160
A_55_P2097729	NA	Gtpbp4	GTP binding protein 4	69237	ENSMUSG00000021149
A_55_P1998354	NA	Wbp4	WW domain binding protein 4	22380	ENSMUSG00000022023
A_51_P505662	NA	4933437F05Rik	RIKEN cDNA 4933437F05 gene	71275	ENSMUSG00000072919
A_66_P106836	NA	Kmo	kynurenine 3-monooxygenase (kynurenine 3-hydroxylase)	98256	ENSMUSG00000039783
A_55_P1954569	NA	Hmgcs1	3-hydroxy-3-methylglutaryl-Coenzyme A synthase 1	208715	ENSMUSG00000093930
A_55_P2012552	NA	Nap1l5	nucleosome assembly protein 1-like 5	58243	ENSMUSG00000055430
A_55_P2078084	NA	Gm13011	predicted gene 13011	242711	ENSMUSG00000078520
A_55_P2045792	NA	Pes1	pescadillo homolog 1, containing BRCT domain (zebrafish)	64934	ENSMUSG00000020430
A_55_P2031466	NA	Lrrc32	leucine rich repeat containing 32	434215	ENSMUSG00000090958
A_51_P289742	NA	Slc27a5	solute carrier family 27 (fatty acid transporter), member 5	26459	ENSMUSG00000030382
A_55_P2074366	NA	Yars	tyrosyl-tRNA synthetase	107271	ENSMUSG00000028811
A_55_P2324712	NA	Dmrt1	doublesex and mab-3 related transcription factor 1	50796	ENSMUSG00000024837
A_55_P2061094	NA	Fnta	farnesyltransferase, CAAX box, alpha	14272	ENSMUSG00000015994
A_55_P2117903	NA	Stard5	StAR-related lipid transfer (START) domain containing 5	170460	ENSMUSG00000046027
A_66_P107038	NA	Prcp	prolylcarboxypeptidase (angiotensinase C)	72461	ENSMUSG00000061119
A_51_P232858	NA	Rpl14	ribosomal protein L14	67115	ENSMUSG00000025794
A_51_P379710	NA	Rpn1	ribophorin I	103963	ENSMUSG00000030062
A_51_P235440	NA	Pelp1	proline, glutamic acid and leucine rich protein 1	75273	ENSMUSG00000018921
A_51_P379083	NA	Adam24	a disintegrin and metallopeptidase domain 24 (testase 1)	13526	ENSMUSG00000046723
A_55_P1966878	NA	Rnaseh2a	ribonuclease H2, large subunit	69724	ENSMUSG00000052926
A_51_P400463	NA	Agmat	agmatine ureohydrolase (agmatinase)	75986	ENSMUSG00000040706
A_55_P2120615	NA	Ssh3	slingshot homolog 3 (Drosophila)	245857	ENSMUSG00000034616
A_51_P441469	NA	Jmy	junction-mediating and regulatory protein	57748	ENSMUSG00000021690
A_52_P52156	NA	Isoc2a	isochorismatase domain containing 2a	664994	ENSMUSG00000086784
A_55_P2151609	NA	Sorl1	sortilin-related receptor, LDLR class A repeats-containing	20660	ENSMUSG00000049313
A_55_P2016346	NA	Eif3d	eukaryotic translation initiation factor 3, subunit D	55944	ENSMUSG00000016554
A_55_P2237129	NA	St6galnac5	ST6 (alpha-N-acetyl-neuraminyl-2,3-beta-galactosyl-1,3)-N-acetylgalactosaminide alpha-2,6-sialyltransferase 5	26938	ENSMUSG00000039037
A_55_P1966755	NA	Cyp2r1	cytochrome P450, family 2, subfamily r, polypeptide 1	244209	ENSMUSG00000030670
A_55_P1970299	NA	Mttp	microsomal triglyceride transfer protein	17777	ENSMUSG00000028158
A_52_P211418	NA	G2e3	G2/M-phase specific E3 ubiquitin ligase	217558	ENSMUSG00000035293
A_55_P2107957	NA	Fam175a	family with sequence similarity 175, member A	70681	ENSMUSG00000035234
A_51_P424532	NA	Vnn1	vanin 1	22361	ENSMUSG00000037440
A_52_P439263	NA	Ugt8a	UDP galactosyltransferase 8A	22239	ENSMUSG00000032854
A_55_P2037712	NA	Smc4	structural maintenance of chromosomes 4	70099	ENSMUSG00000034349
A_66_P123683	NA	Nabp1	nucleic acid binding protein 1	109019	ENSMUSG00000026107
A_51_P362738	NA	Dusp18	dual specificity phosphatase 18	75219	ENSMUSG00000047205
A_51_P506683	NA	Fbxw7	F-box and WD-40 domain protein 7	50754	ENSMUSG00000028086
A_52_P266530	NA	Ide	insulin degrading enzyme	15925	ENSMUSG00000056999
A_55_P2001458	NA	Zscan29	zinc finger SCAN domains 29	99334	ENSMUSG00000050619
A_52_P249920	NA	Zscan29	zinc finger SCAN domains 29	99334	ENSMUSG00000050619
A_55_P1992319	NA	Col4a3bp	collagen, type IV, alpha 3 (Goodpasture antigen) binding protein	68018	ENSMUSG00000021669
A_52_P612382	NA	Cdc25b	cell division cycle 25B	12531	ENSMUSG00000027330
A_51_P334789	NA	Nudt16	nudix (nucleoside diphosphate linked moiety X)-type motif 16	75686	ENSMUSG00000032565
A_51_P350048	NA	Gstt2	glutathione S-transferase, theta 2	14872	ENSMUSG00000033318
A_51_P394115	NA	Aadac	arylacetamide deacetylase (esterase)	67758	ENSMUSG00000027761
A_52_P556082	NA	Trmt2b	TRM2 tRNA methyltransferase 2 homolog B (S. cerevisiae)	215201	ENSMUSG00000067369
A_51_P108659	NA	Pon1	paraoxonase 1	18979	ENSMUSG00000002588
A_55_P2177899	NA	Dact1	dapper homolog 1, antagonist of beta-catenin (xenopus)	59036	ENSMUSG00000044548
A_52_P467046	NA	Wdr48	WD repeat domain 48	67561	ENSMUSG00000032512
A_55_P1963031	NA	Ampd2	adenosine monophosphate deaminase 2	109674	ENSMUSG00000027889
A_55_P2123727	NA	Grb2	growth factor receptor bound protein 2	14784	ENSMUSG00000059923
A_55_P2013569	NA	Agbl4	ATP/GTP binding protein-like 4	78933	ENSMUSG00000061298
A_51_P412809	NA	Dqx1	DEAQ RNA-dependent ATPase	93838	ENSMUSG00000009145
A_51_P180452	NA	Crk	v-crk sarcoma virus CT10 oncogene homolog (avian)	12928	ENSMUSG00000017776
A_51_P448814	NA	Zfp90	zinc finger protein 90	22751	ENSMUSG00000031907
A_55_P1984023	NA	Arrb2	arrestin, beta 2	216869	ENSMUSG00000060216
A_55_P2008452	NA	Wtap	Wilms' tumour 1-associating protein	60532	ENSMUSG00000060475
A_55_P1972054	NA	Capn10	calpain 10	23830	ENSMUSG00000026270
A_51_P510764	NA	Agmo	alkylglycerol monooxygenase	319660	ENSMUSG00000050103
A_55_P2106922	NA	Arfgap3	ADP-ribosylation factor GTPase activating protein 3	66251	ENSMUSG00000054277
A_55_P2120956	NA	Arfgap3	ADP-ribosylation factor GTPase activating protein 3	66251	ENSMUSG00000054277
A_55_P1992329	NA	Gmpr	guanosine monophosphate reductase	66355	ENSMUSG00000000253
A_52_P385536	NA	Ddx58	DEAD (Asp-Glu-Ala-Asp) box polypeptide 58	230073	ENSMUSG00000040296
A_51_P443293	NA	Decr2	2-4-dienoyl-Coenzyme A reductase 2, peroxisomal	26378	ENSMUSG00000036775
A_51_P450169	NA	Dnajb13	DnaJ (Hsp40) related, subfamily B, member 13	69387	ENSMUSG00000030708
A_52_P745	NA	Acox3	acyl-Coenzyme A oxidase 3, pristanoyl	80911	ENSMUSG00000029098
A_51_P343913	NA	Parp4	poly (ADP-ribose) polymerase family, member 4	328417	ENSMUSG00000054509
A_51_P234544	NA	Azin1	antizyme inhibitor 1	54375	ENSMUSG00000037458
A_55_P2141943	NA	Ube2l6	ubiquitin-conjugating enzyme E2L 6	56791	ENSMUSG00000027078
A_55_P2137431	NA	Rtel1	regulator of telomere elongation helicase 1	269400	ENSMUSG00000038685
A_51_P314161	NA	Qtrt1	queuine tRNA-ribosyltransferase 1	60507	ENSMUSG00000002825
A_55_P2114596	NA	Zfp161	zinc finger protein 161	22666	ENSMUSG00000049672
A_55_P2093163	NA	Zfp161	zinc finger protein 161	22666	ENSMUSG00000049672
A_55_P2055257	NA	Maoa	monoamine oxidase A	17161	ENSMUSG00000025037
A_55_P2130256	NA	Polr2l	polymerase (RNA) II (DNA directed) polypeptide L	66491	ENSMUSG00000038489
A_51_P461429	NA	Cyp7b1	cytochrome P450, family 7, subfamily b, polypeptide 1	13123	ENSMUSG00000039519
A_52_P191086	NA	Kcnj6	potassium inwardly-rectifying channel, subfamily J, member 6	16522	ENSMUSG00000043301
A_55_P1975140	NA	Acvr1c	activin A receptor, type IC	269275	ENSMUSG00000026834
A_55_P2064203	NA	Acvr1c	activin A receptor, type IC	269275	ENSMUSG00000026834
A_52_P483129	NA	Utp23	UTP23, small subunit (SSU) processome component, homolog (yeast)	78581	ENSMUSG00000022313
A_51_P425824	NA	Fam132a	family with sequence similarity 132, member A	67389	ENSMUSG00000023571
A_55_P2053241	NA	Gng4	guanine nucleotide binding protein (G protein), gamma 4	14706	ENSMUSG00000021303
A_51_P476261	NA	Zfp120	zinc finger protein 120	104348	ENSMUSG00000068134
A_55_P2015520	NA	Plekha1	pleckstrin homology domain containing, family A (phosphoinositide binding specific) member 1	101476	ENSMUSG00000040268
A_52_P559919	NA	Eif2ak2	eukaryotic translation initiation factor 2-alpha kinase 2	19106	ENSMUSG00000024079
A_55_P2002727	NA	Inpp4a	inositol polyphosphate-4-phosphatase, type I	269180	ENSMUSG00000026113
A_55_P2060107	NA	Pkm	pyruvate kinase, muscle	18746	ENSMUSG00000032294
A_55_P2035667	NA	Gyk	glycerol kinase	14933	ENSMUSG00000025059
A_55_P2134496	NA	Amfr	autocrine motility factor receptor	23802	ENSMUSG00000031751
A_52_P585699	NA	Ciao1	cytosolic iron-sulfur protein assembly 1	26371	ENSMUSG00000003662
A_55_P2103060	NA	Pxk	PX domain containing serine/threonine kinase	218699	ENSMUSG00000033885
A_55_P2071466	NA	Ncf1	neutrophil cytosolic factor 1	17969	ENSMUSG00000015950
A_55_P1957739	NA	Guca2b	guanylate cyclase activator 2b (retina)	14916	ENSMUSG00000032978
A_52_P179068	NA	Gucy1b3	guanylate cyclase 1, soluble, beta 3	54195	ENSMUSG00000028005
A_55_P2046793	NA	Eogt	EGF domain-specific O-linked N-acetylglucosamine (GlcNAc) transferase	101351	ENSMUSG00000035245
A_55_P2146314	NA	Lmx1a	LIM homeobox transcription factor 1 alpha	110648	ENSMUSG00000026686
A_52_P270145	NA	Zfp329	zinc finger protein 329	67230	ENSMUSG00000057894
A_55_P2049252	NA	Mapkapk5	MAP kinase-activated protein kinase 5	17165	ENSMUSG00000029454
A_52_P359965	NA	Cpd	carboxypeptidase D	12874	ENSMUSG00000020841
A_51_P285779	NA	Asphd2	aspartate beta-hydroxylase domain containing 2	72898	ENSMUSG00000029348
A_51_P518488	NA	Atpif1	ATPase inhibitory factor 1	11983	ENSMUSG00000054428
A_51_P483473	NA	St3gal5	ST3 beta-galactoside alpha-2,3-sialyltransferase 5	20454	ENSMUSG00000056091
A_51_P505322	NA	Mpnd	MPN domain containing	68047	ENSMUSG00000003199
A_52_P667287	NA	Lass6	LAG1 homolog, ceramide synthase 6	241447	ENSMUSG00000027035
A_55_P2138956	NA	Tpk1	thiamine pyrophosphokinase	29807	ENSMUSG00000029735
A_51_P106952	NA	Rbm26	RNA binding motif protein 26	74213	ENSMUSG00000022119
A_55_P1965876	NA	Opn1mw	opsin 1 (cone pigments), medium-wave-sensitive (color blindness, deutan)	14539	ENSMUSG00000031394
A_55_P1959238	NA	Nagk	N-acetylglucosamine kinase	56174	ENSMUSG00000034744
A_55_P2122605	NA	Cbr2	carbonyl reductase 2	12409	ENSMUSG00000025150
A_55_P2122604	NA	Cbr2	carbonyl reductase 2	12409	ENSMUSG00000025150
A_52_P356204	NA	Nostrin	nitric oxide synthase trafficker	329416	ENSMUSG00000034738
A_65_P09523	NA	Scrn3	secernin 3	74616	ENSMUSG00000008226
A_55_P2152962	NA	Mtr	5-methyltetrahydrofolate-homocysteine methyltransferase	238505	ENSMUSG00000021311
A_55_P2080130	NA	Aim2	absent in melanoma 2	383619	ENSMUSG00000037860
A_51_P451075	NA	Atp2a2	ATPase, Ca++ transporting, cardiac muscle, slow twitch 2	11938	ENSMUSG00000029467
A_55_P1995404	NA	Cd59b	CD59b antigen	333883	ENSMUSG00000068686
A_55_P2162807	NA	Pla2g2e	phospholipase A2, group IIE	26970	ENSMUSG00000028751
A_66_P113008	NA	Pla2g2e	phospholipase A2, group IIE	26970	ENSMUSG00000028751
A_52_P494115	NA	Gatad2b	GATA zinc finger domain containing 2B	229542	ENSMUSG00000042390
A_55_P1953961	NA	Cdkl3	cyclin-dependent kinase-like 3	213084	ENSMUSG00000020389
A_55_P2142439	NA	Echdc2	enoyl Coenzyme A hydratase domain containing 2	52430	ENSMUSG00000028601
A_55_P2174967	NA	Elac2	elaC homolog 2 (E. coli)	68626	ENSMUSG00000020549
A_51_P483280	NA	Prnp	prion protein	19122	ENSMUSG00000079037
A_66_P105175	NA	Bche	butyrylcholinesterase	12038	ENSMUSG00000027792
A_55_P2097178	NA	Idua	iduronidase, alpha-L-	15932	ENSMUSG00000033540
A_55_P2017312	NA	Eapp	E2F-associated phosphoprotein	66266	ENSMUSG00000054302
A_52_P649285	NA	Cdc26	cell division cycle 26	66440	ENSMUSG00000066149
A_52_P500002	NA	Tspyl5	testis-specific protein, Y-encoded-like 5	239364	ENSMUSG00000038984
A_52_P223521	NA	Brwd1	bromodomain and WD repeat domain containing 1	93871	ENSMUSG00000022914
A_51_P408584	NA	Enpp1	ectonucleotide pyrophosphatase/phosphodiesterase 1	18605	ENSMUSG00000037370
A_51_P506045	NA	Pgcp	plasma glutamate carboxypeptidase	54381	ENSMUSG00000039007
A_55_P2041529	NA	Eya4	eyes absent 4 homolog (Drosophila)	14051	ENSMUSG00000010461
A_55_P2008790	NA	Zfp30	zinc finger protein 30	22693	ENSMUSG00000047473
A_55_P2081616	NA	Timeless	timeless homolog (Drosophila)	21853	ENSMUSG00000039994
A_55_P2151556	NA	C8g	complement component 8, gamma polypeptide	69379	ENSMUSG00000015083
A_55_P1982585	NA	Kdm4a	lysine (K)-specific demethylase 4A	230674	ENSMUSG00000033326
A_55_P1988058	NA	Tyw3	tRNA-yW synthesizing protein 3 homolog (S. cerevisiae)	209584	ENSMUSG00000047583
A_55_P1979620	NA	Eif3h	eukaryotic translation initiation factor 3, subunit H	68135	ENSMUSG00000022312
A_55_P2084332	NA	Pigp	phosphatidylinositol glycan anchor biosynthesis, class P	56176	ENSMUSG00000022940
A_55_P1962946	NA	Syk	spleen tyrosine kinase	20963	ENSMUSG00000021457
A_51_P339822	NA	Arhgap4	Rho GTPase activating protein 4	171207	ENSMUSG00000031389
A_55_P2147220	NA	Ak2	adenylate kinase 2	11637	ENSMUSG00000028792
A_55_P2143119	NA	Ddx39b	DEAD (Asp-Glu-Ala-Asp) box polypeptide 39B	53817	ENSMUSG00000019432
A_55_P2130501	NA	Fndc1	fibronectin type III domain containing 1	68655	ENSMUSG00000071984
A_51_P117226	NA	Zdhhc2	zinc finger, DHHC domain containing 2	70546	ENSMUSG00000039470
A_52_P651248	NA	Zdhhc2	zinc finger, DHHC domain containing 2	70546	ENSMUSG00000039470
A_55_P2148082	NA	Larp7	La ribonucleoprotein domain family, member 7	28036	ENSMUSG00000027968
A_55_P1958447	NA	Prepl	prolyl endopeptidase-like	213760	ENSMUSG00000024127
A_52_P491073	NA	Nek8	NIMA (never in mitosis gene a)-related expressed kinase 8	140859	ENSMUSG00000017405
A_51_P329818	NA	Dpep3	dipeptidase 3	71854	ENSMUSG00000031898
A_51_P129149	NA	Gatad2a	GATA zinc finger domain containing 2A	234366	ENSMUSG00000036180
A_51_P388374	NA	Ppil4	peptidylprolyl isomerase (cyclophilin)-like 4	67418	ENSMUSG00000015757
A_55_P1991851	NA	Speg	SPEG complex locus	11790	ENSMUSG00000026207
A_55_P2020050	NA	Itga6	integrin alpha 6	16403	ENSMUSG00000027111
A_55_P2060498	NA	Zfp553	zinc finger protein 553	233887	ENSMUSG00000045598
A_55_P2007646	NA	Cryaa	crystallin, alpha A	12954	ENSMUSG00000024041
A_55_P2031636	NA	Igf1	insulin-like growth factor 1	16000	ENSMUSG00000020053
A_51_P474454	NA	Rnaseh2b	ribonuclease H2, subunit B	67153	ENSMUSG00000021932
A_52_P76402	NA	Eif2c1	eukaryotic translation initiation factor 2C, 1	236511	ENSMUSG00000041530
A_55_P1976690	NA	Snrnp35	small nuclear ribonucleoprotein 35 (U11/U12)	76167	ENSMUSG00000029402
A_52_P85765	NA	Stard6	StAR-related lipid transfer (START) domain containing 6	170461	ENSMUSG00000079608
A_55_P1997424	NA	Cwc22	CWC22 spliceosome-associated protein homolog (S. cerevisiae)	80744	ENSMUSG00000027014
A_52_P20357	NA	Aqr	aquarius	11834	ENSMUSG00000040383
A_55_P2040777	NA	Lipo1	lipase, member O1	381236	ENSMUSG00000024766
A_51_P328968	NA	Zfp322a	zinc finger protein 322A	218100	ENSMUSG00000046351
A_51_P223575	NA	Tbc1d23	TBC1 domain family, member 23	67581	ENSMUSG00000022749
A_65_P08971	NA	F3	coagulation factor III	14066	ENSMUSG00000028128
A_55_P1954945	NA	Lyg1	lysozyme G-like 1	69541	ENSMUSG00000026085
A_55_P1990849	NA	Dclre1b	DNA cross-link repair 1B, PSO2 homolog (S. cerevisiae)	140917	ENSMUSG00000027845
A_51_P150120	NA	Mgst2	microsomal glutathione S-transferase 2	211666	ENSMUSG00000074604
A_51_P428742	NA	Pus7l	pseudouridylate synthase 7 homolog (S. cerevisiae)-like	78895	ENSMUSG00000033356
A_51_P284823	NA	Polr1b	polymerase (RNA) I polypeptide B	20017	ENSMUSG00000027395
A_55_P2144766	NA	Pigc	phosphatidylinositol glycan anchor biosynthesis, class C	67292	ENSMUSG00000026698
A_55_P1969058	NA	Epha7	Eph receptor A7	13841	ENSMUSG00000028289
A_52_P537852	NA	Fam120b	family with sequence similarity 120B	67544	ENSMUSG00000014763
A_55_P2075200	NA	Tor3a	torsin family 3, member A	30935	ENSMUSG00000060519
A_55_P2130610	NA	Smc3	structural maintenance of chromosomes 3	13006	ENSMUSG00000024974
A_55_P2051914	NA	Zfp568	zinc finger protein 568	243905	ENSMUSG00000074221
A_55_P2119463	NA	Ggh	gamma-glutamyl hydrolase	14590	ENSMUSG00000073987
A_51_P438952	NA	Bag4	BCL2-associated athanogene 4	67384	ENSMUSG00000037316
A_66_P134090	NA	Grpel2	GrpE-like 2, mitochondrial	17714	ENSMUSG00000024580
A_55_P2073647	NA	Elp2	elongator acetyltransferase complex subunit 2	58523	ENSMUSG00000024271
A_55_P2066230	NA	Hck	hemopoietic cell kinase	15162	ENSMUSG00000003283
A_55_P2059337	NA	Fastk	Fas-activated serine/threonine kinase	66587	ENSMUSG00000028959
A_55_P1981050	NA	Gemin8	gem (nuclear organelle) associated protein 8	237221	ENSMUSG00000040621
A_51_P327188	NA	Senp1	SUMO1/sentrin specific peptidase 1	223870	ENSMUSG00000033075
A_55_P1977473	NA	Dab2	disabled 2, mitogen-responsive phosphoprotein	13132	ENSMUSG00000022150
A_52_P470466	NA	D3Bwg0562e	DNA segment, Chr 3, Brigham & Women's Genetics 0562 expressed	229791	ENSMUSG00000044667
A_66_P123787	NA	Lars2	leucyl-tRNA synthetase, mitochondrial	102436	ENSMUSG00000035202
A_55_P2074631	NA	Cpeb1	cytoplasmic polyadenylation element binding protein 1	12877	ENSMUSG00000025586
A_55_P2075127	NA	Pax2	paired box gene 2	18504	ENSMUSG00000004231
A_55_P2049388	NA	Zfp28	zinc finger protein 28	22690	ENSMUSG00000062861
A_55_P2122200	NA	Prkar2b	protein kinase, cAMP dependent regulatory, type II beta	19088	ENSMUSG00000002997
A_51_P436483	NA	Kin	antigenic determinant of rec-A protein	16588	ENSMUSG00000037262
A_52_P48546	NA	Rnf41	ring finger protein 41	67588	ENSMUSG00000025373
A_52_P508974	NA	Igf2bp3	insulin-like growth factor 2 mRNA binding protein 3	140488	ENSMUSG00000029814
A_52_P427240	NA	Ltn1	listerin E3 ubiquitin protein ligase 1	78913	ENSMUSG00000052299
A_51_P444437	NA	Ptgr1	prostaglandin reductase 1	67103	ENSMUSG00000028378
A_51_P122141	NA	Mamstr	MEF2 activating motif and SAP domain containing transcriptional regulator	74490	ENSMUSG00000042918
A_51_P156158	NA	Phlpp1	PH domain and leucine rich repeat protein phosphatase 1	98432	ENSMUSG00000044340
A_51_P466221	NA	Amhr2	anti-Mullerian hormone type 2 receptor	110542	ENSMUSG00000023047
A_51_P396385	NA	Mars2	methionine-tRNA synthetase 2 (mitochondrial)	212679	ENSMUSG00000046994
A_55_P1996674	NA	Itih3	inter-alpha trypsin inhibitor, heavy chain 3	16426	ENSMUSG00000006522
A_66_P139159	NA	Hras1	Harvey rat sarcoma virus oncogene 1	15461	ENSMUSG00000025499
A_55_P2013858	NA	Acad8	acyl-Coenzyme A dehydrogenase family, member 8	66948	ENSMUSG00000031969
A_52_P156190	NA	Ednra	endothelin receptor type A	13617	ENSMUSG00000031616
A_55_P2097393	NA	Txndc8	thioredoxin domain containing 8	67402	ENSMUSG00000038709
A_55_P1996299	NA	Pofut1	protein O-fucosyltransferase 1	140484	ENSMUSG00000046020
A_55_P2185950	NA	Bpnt1	bisphosphate 3'-nucleotidase 1	23827	ENSMUSG00000026617
A_55_P2051778	NA	Sult2b1	sulfotransferase family, cytosolic, 2B, member 1	54200	ENSMUSG00000003271
A_55_P2054315	NA	Mcpt2	mast cell protease 2	17225	ENSMUSG00000022226
A_55_P2120433	NA	Wdr12	WD repeat domain 12	57750	ENSMUSG00000026019
A_51_P235687	NA	Alox5ap	arachidonate 5-lipoxygenase activating protein	11690	ENSMUSG00000060063
A_51_P484842	NA	Asgr2	asialoglycoprotein receptor 2	11890	ENSMUSG00000040963
A_51_P155174	NA	Zfp672	zinc finger protein 672	319475	ENSMUSG00000049755
A_52_P510119	NA	Pgm2l1	phosphoglucomutase 2-like 1	70974	ENSMUSG00000030729
A_52_P86073	NA	Mrpl1	mitochondrial ribosomal protein L1	94061	ENSMUSG00000029486
A_55_P2003483	NA	Gldc	glycine decarboxylase	104174	ENSMUSG00000024827
A_55_P2165239	NA	Abl1	c-abl oncogene 1, non-receptor tyrosine kinase	11350	ENSMUSG00000026842
A_55_P2112120	NA	Tnk2	tyrosine kinase, non-receptor, 2	51789	ENSMUSG00000022791
A_55_P2151689	NA	Traf6	TNF receptor-associated factor 6	22034	ENSMUSG00000027164
A_51_P340402	NA	Eefsec	eukaryotic elongation factor, selenocysteine-tRNA-specific	65967	ENSMUSG00000033216
A_55_P2379599	NA	Asph	aspartate-beta-hydroxylase	65973	ENSMUSG00000028207
A_55_P2076288	NA	Zfp661	zinc finger protein 661	72180	ENSMUSG00000034800
A_55_P2124425	NA	Zfp661	zinc finger protein 661	72180	ENSMUSG00000034800
A_55_P2034260	NA	Ctdsp1	CTD (carboxy-terminal domain, RNA polymerase II, polypeptide A) small phosphatase 1	227292	ENSMUSG00000026176
A_51_P491051	NA	Ints9	integrator complex subunit 9	210925	ENSMUSG00000021975
A_55_P2158483	NA	Nkiras2	NFKB inhibitor interacting Ras-like protein 2	71966	ENSMUSG00000017837
A_52_P235278	NA	Pms1	postmeiotic segregation increased 1 (S. cerevisiae)	227099	ENSMUSG00000026098
A_66_P105307	NA	Adnp	activity-dependent neuroprotective protein	11538	ENSMUSG00000051149
A_52_P359502	NA	Pdxk	pyridoxal (pyridoxine, vitamin B6) kinase	216134	ENSMUSG00000032788
A_65_P18981	NA	Palb2	partner and localizer of BRCA2	233826	ENSMUSG00000044702
A_55_P2051313	NA	Gstk1	glutathione S-transferase kappa 1	76263	ENSMUSG00000029864
A_52_P459929	NA	Itga1	integrin alpha 1	109700	ENSMUSG00000042284
A_55_P2100715	NA	Auh	AU RNA binding protein/enoyl-coenzyme A hydratase	11992	ENSMUSG00000021460
A_55_P2069885	NA	Slc50a1	solute carrier family 50 (sugar transporter), member 1	19729	ENSMUSG00000027953
A_51_P201480	NA	Stat3	signal transducer and activator of transcription 3	20848	ENSMUSG00000004040
A_51_P511899	NA	Mthfsd	methenyltetrahydrofolate synthetase domain containing	234814	ENSMUSG00000031816
A_55_P1973267	NA	Ddhd2	DDHD domain containing 2	72108	ENSMUSG00000061313
A_51_P104933	NA	Trub2	TruB pseudouridine (psi) synthase homolog 2 (E. coli)	227682	ENSMUSG00000039826
A_55_P1986351	NA	D630037F22Rik	RIKEN cDNA D630037F22 gene	544696	ENSMUSG00000038122
A_52_P136709	NA	Pctp	phosphatidylcholine transfer protein	18559	ENSMUSG00000020553
A_51_P452768	NA	Cyp4f14	cytochrome P450, family 4, subfamily f, polypeptide 14	64385	ENSMUSG00000024292
A_55_P1957249	NA	Pdgfrb	platelet derived growth factor receptor, beta polypeptide	18596	ENSMUSG00000024620
A_55_P2067116	NA	Dclre1c	DNA cross-link repair 1C, PSO2 homolog (S. cerevisiae)	227525	ENSMUSG00000026648
A_55_P1954835	NA	Ramp3	receptor (calcitonin) activity modifying protein 3	56089	ENSMUSG00000041046
A_55_P2101340	NA	Ramp3	receptor (calcitonin) activity modifying protein 3	56089	ENSMUSG00000041046
A_55_P1953723	NA	Rab13	RAB13, member RAS oncogene family	68328	ENSMUSG00000027935
A_51_P447668	NA	Ptpn12	protein tyrosine phosphatase, non-receptor type 12	19248	ENSMUSG00000028771
A_65_P19112	NA	Zfp397	zinc finger protein 397	69256	ENSMUSG00000024276
A_55_P2044463	NA	Lipt2	lipoyl(octanoyl) transferase 2 (putative)	67164	ENSMUSG00000030725
A_55_P2155002	NA	Ccdc23	coiled-coil domain containing 23	69216	ENSMUSG00000028643
A_55_P2159830	NA	Yaf2	YY1 associated factor 2	67057	ENSMUSG00000022634
A_55_P1999309	NA	Zfp668	zinc finger protein 668	244219	ENSMUSG00000049728
A_55_P2033507	NA	Ltbp4	latent transforming growth factor beta binding protein 4	108075	ENSMUSG00000040488
A_55_P1957319	NA	Krr1	KRR1, small subunit (SSU) processome component, homolog (yeast)	52705	ENSMUSG00000063334
A_55_P2015687	NA	D14Ertd668e	DNA segment, Chr 14, ERATO Doi 668, expressed	219132	ENSMUSG00000068245
A_55_P2166501	NA	Cd44	CD44 antigen	12505	ENSMUSG00000005087
A_51_P229655	NA	Acsm5	acyl-CoA synthetase medium-chain family member 5	272428	ENSMUSG00000030972
biological process	small molecule metabolic process	GO:0044281
C=1824;O=77;E=45.41;R=1.70;rawP=3.54e-06;adjP=0.0016
A_52_P478236	NA	Wrn	Werner syndrome homolog (human)	22427	ENSMUSG00000031583
A_55_P2149269	NA	Galt	galactose-1-phosphate uridyl transferase	14430	ENSMUSG00000036073
A_55_P2097729	NA	Gtpbp4	GTP binding protein 4	69237	ENSMUSG00000021149
A_51_P505662	NA	4933437F05Rik	RIKEN cDNA 4933437F05 gene	71275	ENSMUSG00000072919
A_66_P106836	NA	Kmo	kynurenine 3-monooxygenase (kynurenine 3-hydroxylase)	98256	ENSMUSG00000039783
A_55_P1954569	NA	Hmgcs1	3-hydroxy-3-methylglutaryl-Coenzyme A synthase 1	208715	ENSMUSG00000093930
A_51_P339822	NA	Arhgap4	Rho GTPase activating protein 4	171207	ENSMUSG00000031389
A_55_P2147220	NA	Ak2	adenylate kinase 2	11637	ENSMUSG00000028792
A_51_P289742	NA	Slc27a5	solute carrier family 27 (fatty acid transporter), member 5	26459	ENSMUSG00000030382
A_55_P2074366	NA	Yars	tyrosyl-tRNA synthetase	107271	ENSMUSG00000028811
A_55_P2031636	NA	Igf1	insulin-like growth factor 1	16000	ENSMUSG00000020053
A_51_P223575	NA	Tbc1d23	TBC1 domain family, member 23	67581	ENSMUSG00000022749
A_51_P150120	NA	Mgst2	microsomal glutathione S-transferase 2	211666	ENSMUSG00000074604
A_55_P2151609	NA	Sorl1	sortilin-related receptor, LDLR class A repeats-containing	20660	ENSMUSG00000049313
A_55_P1966755	NA	Cyp2r1	cytochrome P450, family 2, subfamily r, polypeptide 1	244209	ENSMUSG00000030670
A_55_P1970299	NA	Mttp	microsomal triglyceride transfer protein	17777	ENSMUSG00000028158
A_55_P1953919	NA	Me3	malic enzyme 3, NADP(+)-dependent, mitochondrial	109264	ENSMUSG00000030621
A_51_P424532	NA	Vnn1	vanin 1	22361	ENSMUSG00000037440
A_55_P2119463	NA	Ggh	gamma-glutamyl hydrolase	14590	ENSMUSG00000073987
A_52_P266530	NA	Ide	insulin degrading enzyme	15925	ENSMUSG00000056999
A_55_P2171413	NA	Me1	malic enzyme 1, NADP(+)-dependent, cytosolic	17436	ENSMUSG00000032418
A_55_P2009952	NA	Me1	malic enzyme 1, NADP(+)-dependent, cytosolic	17436	ENSMUSG00000032418
A_51_P334789	NA	Nudt16	nudix (nucleoside diphosphate linked moiety X)-type motif 16	75686	ENSMUSG00000032565
A_51_P350048	NA	Gstt2	glutathione S-transferase, theta 2	14872	ENSMUSG00000033318
A_51_P108659	NA	Pon1	paraoxonase 1	18979	ENSMUSG00000002588
A_55_P1963031	NA	Ampd2	adenosine monophosphate deaminase 2	109674	ENSMUSG00000027889
A_51_P412809	NA	Dqx1	DEAQ RNA-dependent ATPase	93838	ENSMUSG00000009145
A_66_P123787	NA	Lars2	leucyl-tRNA synthetase, mitochondrial	102436	ENSMUSG00000035202
A_51_P180452	NA	Crk	v-crk sarcoma virus CT10 oncogene homolog (avian)	12928	ENSMUSG00000017776
A_55_P1984023	NA	Arrb2	arrestin, beta 2	216869	ENSMUSG00000060216
A_51_P510764	NA	Agmo	alkylglycerol monooxygenase	319660	ENSMUSG00000050103
A_55_P2106922	NA	Arfgap3	ADP-ribosylation factor GTPase activating protein 3	66251	ENSMUSG00000054277
A_55_P2120956	NA	Arfgap3	ADP-ribosylation factor GTPase activating protein 3	66251	ENSMUSG00000054277
A_55_P2122200	NA	Prkar2b	protein kinase, cAMP dependent regulatory, type II beta	19088	ENSMUSG00000002997
A_55_P1992329	NA	Gmpr	guanosine monophosphate reductase	66355	ENSMUSG00000000253
A_51_P443293	NA	Decr2	2-4-dienoyl-Coenzyme A reductase 2, peroxisomal	26378	ENSMUSG00000036775
A_51_P396385	NA	Mars2	methionine-tRNA synthetase 2 (mitochondrial)	212679	ENSMUSG00000046994
A_66_P139159	NA	Hras1	Harvey rat sarcoma virus oncogene 1	15461	ENSMUSG00000025499
A_55_P2013858	NA	Acad8	acyl-Coenzyme A dehydrogenase family, member 8	66948	ENSMUSG00000031969
A_52_P745	NA	Acox3	acyl-Coenzyme A oxidase 3, pristanoyl	80911	ENSMUSG00000029098
A_52_P156190	NA	Ednra	endothelin receptor type A	13617	ENSMUSG00000031616
A_55_P2097393	NA	Txndc8	thioredoxin domain containing 8	67402	ENSMUSG00000038709
A_51_P314161	NA	Qtrt1	queuine tRNA-ribosyltransferase 1	60507	ENSMUSG00000002825
A_55_P2055257	NA	Maoa	monoamine oxidase A	17161	ENSMUSG00000025037
A_51_P235687	NA	Alox5ap	arachidonate 5-lipoxygenase activating protein	11690	ENSMUSG00000060063
A_51_P461429	NA	Cyp7b1	cytochrome P450, family 7, subfamily b, polypeptide 1	13123	ENSMUSG00000039519
A_52_P191086	NA	Kcnj6	potassium inwardly-rectifying channel, subfamily J, member 6	16522	ENSMUSG00000043301
A_51_P425824	NA	Fam132a	family with sequence similarity 132, member A	67389	ENSMUSG00000023571
A_55_P2053241	NA	Gng4	guanine nucleotide binding protein (G protein), gamma 4	14706	ENSMUSG00000021303
A_55_P2003483	NA	Gldc	glycine decarboxylase	104174	ENSMUSG00000024827
A_55_P2156855	NA	Car13	carbonic anhydrase 13	71934	ENSMUSG00000027555
A_55_P2002727	NA	Inpp4a	inositol polyphosphate-4-phosphatase, type I	269180	ENSMUSG00000026113
A_55_P2060107	NA	Pkm	pyruvate kinase, muscle	18746	ENSMUSG00000032294
A_55_P2035667	NA	Gyk	glycerol kinase	14933	ENSMUSG00000025059
A_55_P2158483	NA	Nkiras2	NFKB inhibitor interacting Ras-like protein 2	71966	ENSMUSG00000017837
A_55_P2103060	NA	Pxk	PX domain containing serine/threonine kinase	218699	ENSMUSG00000033885
A_66_P105307	NA	Adnp	activity-dependent neuroprotective protein	11538	ENSMUSG00000051149
A_52_P359502	NA	Pdxk	pyridoxal (pyridoxine, vitamin B6) kinase	216134	ENSMUSG00000032788
A_55_P2071466	NA	Ncf1	neutrophil cytosolic factor 1	17969	ENSMUSG00000015950
A_55_P2051313	NA	Gstk1	glutathione S-transferase kappa 1	76263	ENSMUSG00000029864
A_52_P179068	NA	Gucy1b3	guanylate cyclase 1, soluble, beta 3	54195	ENSMUSG00000028005
A_55_P1957739	NA	Guca2b	guanylate cyclase activator 2b (retina)	14916	ENSMUSG00000032978
A_55_P2100715	NA	Auh	AU RNA binding protein/enoyl-coenzyme A hydratase	11992	ENSMUSG00000021460
A_51_P511899	NA	Mthfsd	methenyltetrahydrofolate synthetase domain containing	234814	ENSMUSG00000031816
A_55_P1986351	NA	D630037F22Rik	RIKEN cDNA D630037F22 gene	544696	ENSMUSG00000038122
A_51_P518488	NA	Atpif1	ATPase inhibitory factor 1	11983	ENSMUSG00000054428
A_52_P136709	NA	Pctp	phosphatidylcholine transfer protein	18559	ENSMUSG00000020553
A_55_P2138956	NA	Tpk1	thiamine pyrophosphokinase	29807	ENSMUSG00000029735
A_55_P2122605	NA	Cbr2	carbonyl reductase 2	12409	ENSMUSG00000025150
A_55_P2122604	NA	Cbr2	carbonyl reductase 2	12409	ENSMUSG00000025150
A_51_P452768	NA	Cyp4f14	cytochrome P450, family 4, subfamily f, polypeptide 14	64385	ENSMUSG00000024292
A_55_P2152962	NA	Mtr	5-methyltetrahydrofolate-homocysteine methyltransferase	238505	ENSMUSG00000021311
A_55_P1953723	NA	Rab13	RAB13, member RAS oncogene family	68328	ENSMUSG00000027935
A_55_P2044463	NA	Lipt2	lipoyl(octanoyl) transferase 2 (putative)	67164	ENSMUSG00000030725
A_51_P451075	NA	Atp2a2	ATPase, Ca++ transporting, cardiac muscle, slow twitch 2	11938	ENSMUSG00000029467
A_55_P2142439	NA	Echdc2	enoyl Coenzyme A hydratase domain containing 2	52430	ENSMUSG00000028601
A_66_P105175	NA	Bche	butyrylcholinesterase	12038	ENSMUSG00000027792
A_51_P229655	NA	Acsm5	acyl-CoA synthetase medium-chain family member 5	272428	ENSMUSG00000030972
A_51_P408584	NA	Enpp1	ectonucleotide pyrophosphatase/phosphodiesterase 1	18605	ENSMUSG00000037370
A_51_P506045	NA	Pgcp	plasma glutamate carboxypeptidase	54381	ENSMUSG00000039007
biological process	cellular metabolic process	GO:0044237
C=7571;O=237;E=188.49;R=1.26;rawP=1.28e-05;adjP=0.0046
A_52_P478236	NA	Wrn	Werner syndrome homolog (human)	22427	ENSMUSG00000031583
A_55_P2149269	NA	Galt	galactose-1-phosphate uridyl transferase	14430	ENSMUSG00000036073
A_55_P2118799	NA	Rmi1	RMI1, RecQ mediated genome instability 1, homolog (S. cerevisiae)	74386	ENSMUSG00000035367
A_55_P1961140	NA	Mettl3	methyltransferase like 3	56335	ENSMUSG00000022160
A_55_P2097729	NA	Gtpbp4	GTP binding protein 4	69237	ENSMUSG00000021149
A_55_P1998354	NA	Wbp4	WW domain binding protein 4	22380	ENSMUSG00000022023
A_51_P505662	NA	4933437F05Rik	RIKEN cDNA 4933437F05 gene	71275	ENSMUSG00000072919
A_66_P106836	NA	Kmo	kynurenine 3-monooxygenase (kynurenine 3-hydroxylase)	98256	ENSMUSG00000039783
A_55_P1954569	NA	Hmgcs1	3-hydroxy-3-methylglutaryl-Coenzyme A synthase 1	208715	ENSMUSG00000093930
A_55_P2012552	NA	Nap1l5	nucleosome assembly protein 1-like 5	58243	ENSMUSG00000055430
A_55_P2045792	NA	Pes1	pescadillo homolog 1, containing BRCT domain (zebrafish)	64934	ENSMUSG00000020430
A_51_P289742	NA	Slc27a5	solute carrier family 27 (fatty acid transporter), member 5	26459	ENSMUSG00000030382
A_55_P2074366	NA	Yars	tyrosyl-tRNA synthetase	107271	ENSMUSG00000028811
A_51_P468505	NA	2810408M09Rik	RIKEN cDNA 2810408M09 gene	381406	ENSMUSG00000039725
A_55_P2324712	NA	Dmrt1	doublesex and mab-3 related transcription factor 1	50796	ENSMUSG00000024837
A_55_P2061094	NA	Fnta	farnesyltransferase, CAAX box, alpha	14272	ENSMUSG00000015994
A_51_P232858	NA	Rpl14	ribosomal protein L14	67115	ENSMUSG00000025794
A_51_P379710	NA	Rpn1	ribophorin I	103963	ENSMUSG00000030062
A_51_P235440	NA	Pelp1	proline, glutamic acid and leucine rich protein 1	75273	ENSMUSG00000018921
A_55_P1966878	NA	Rnaseh2a	ribonuclease H2, large subunit	69724	ENSMUSG00000052926
A_51_P400463	NA	Agmat	agmatine ureohydrolase (agmatinase)	75986	ENSMUSG00000040706
A_55_P2120615	NA	Ssh3	slingshot homolog 3 (Drosophila)	245857	ENSMUSG00000034616
A_51_P441469	NA	Jmy	junction-mediating and regulatory protein	57748	ENSMUSG00000021690
A_55_P2016346	NA	Eif3d	eukaryotic translation initiation factor 3, subunit D	55944	ENSMUSG00000016554
A_55_P2237129	NA	St6galnac5	ST6 (alpha-N-acetyl-neuraminyl-2,3-beta-galactosyl-1,3)-N-acetylgalactosaminide alpha-2,6-sialyltransferase 5	26938	ENSMUSG00000039037
A_55_P1970299	NA	Mttp	microsomal triglyceride transfer protein	17777	ENSMUSG00000028158
A_52_P211418	NA	G2e3	G2/M-phase specific E3 ubiquitin ligase	217558	ENSMUSG00000035293
A_55_P2107957	NA	Fam175a	family with sequence similarity 175, member A	70681	ENSMUSG00000035234
A_51_P424532	NA	Vnn1	vanin 1	22361	ENSMUSG00000037440
A_52_P439263	NA	Ugt8a	UDP galactosyltransferase 8A	22239	ENSMUSG00000032854
A_55_P2037712	NA	Smc4	structural maintenance of chromosomes 4	70099	ENSMUSG00000034349
A_66_P123683	NA	Nabp1	nucleic acid binding protein 1	109019	ENSMUSG00000026107
A_51_P362738	NA	Dusp18	dual specificity phosphatase 18	75219	ENSMUSG00000047205
A_51_P506683	NA	Fbxw7	F-box and WD-40 domain protein 7	50754	ENSMUSG00000028086
A_52_P266530	NA	Ide	insulin degrading enzyme	15925	ENSMUSG00000056999
A_55_P2001458	NA	Zscan29	zinc finger SCAN domains 29	99334	ENSMUSG00000050619
A_52_P249920	NA	Zscan29	zinc finger SCAN domains 29	99334	ENSMUSG00000050619
A_55_P1992319	NA	Col4a3bp	collagen, type IV, alpha 3 (Goodpasture antigen) binding protein	68018	ENSMUSG00000021669
A_52_P612382	NA	Cdc25b	cell division cycle 25B	12531	ENSMUSG00000027330
A_51_P334789	NA	Nudt16	nudix (nucleoside diphosphate linked moiety X)-type motif 16	75686	ENSMUSG00000032565
A_51_P350048	NA	Gstt2	glutathione S-transferase, theta 2	14872	ENSMUSG00000033318
A_51_P394115	NA	Aadac	arylacetamide deacetylase (esterase)	67758	ENSMUSG00000027761
A_52_P556082	NA	Trmt2b	TRM2 tRNA methyltransferase 2 homolog B (S. cerevisiae)	215201	ENSMUSG00000067369
A_51_P108659	NA	Pon1	paraoxonase 1	18979	ENSMUSG00000002588
A_55_P2177899	NA	Dact1	dapper homolog 1, antagonist of beta-catenin (xenopus)	59036	ENSMUSG00000044548
A_52_P467046	NA	Wdr48	WD repeat domain 48	67561	ENSMUSG00000032512
A_55_P1963031	NA	Ampd2	adenosine monophosphate deaminase 2	109674	ENSMUSG00000027889
A_55_P2123727	NA	Grb2	growth factor receptor bound protein 2	14784	ENSMUSG00000059923
A_55_P2013569	NA	Agbl4	ATP/GTP binding protein-like 4	78933	ENSMUSG00000061298
A_51_P412809	NA	Dqx1	DEAQ RNA-dependent ATPase	93838	ENSMUSG00000009145
A_51_P180452	NA	Crk	v-crk sarcoma virus CT10 oncogene homolog (avian)	12928	ENSMUSG00000017776
A_51_P448814	NA	Zfp90	zinc finger protein 90	22751	ENSMUSG00000031907
A_55_P1984023	NA	Arrb2	arrestin, beta 2	216869	ENSMUSG00000060216
A_55_P2008452	NA	Wtap	Wilms' tumour 1-associating protein	60532	ENSMUSG00000060475
A_51_P510764	NA	Agmo	alkylglycerol monooxygenase	319660	ENSMUSG00000050103
A_55_P2106922	NA	Arfgap3	ADP-ribosylation factor GTPase activating protein 3	66251	ENSMUSG00000054277
A_55_P2120956	NA	Arfgap3	ADP-ribosylation factor GTPase activating protein 3	66251	ENSMUSG00000054277
A_55_P1992329	NA	Gmpr	guanosine monophosphate reductase	66355	ENSMUSG00000000253
A_52_P385536	NA	Ddx58	DEAD (Asp-Glu-Ala-Asp) box polypeptide 58	230073	ENSMUSG00000040296
A_51_P443293	NA	Decr2	2-4-dienoyl-Coenzyme A reductase 2, peroxisomal	26378	ENSMUSG00000036775
A_51_P450169	NA	Dnajb13	DnaJ (Hsp40) related, subfamily B, member 13	69387	ENSMUSG00000030708
A_52_P745	NA	Acox3	acyl-Coenzyme A oxidase 3, pristanoyl	80911	ENSMUSG00000029098
A_51_P343913	NA	Parp4	poly (ADP-ribose) polymerase family, member 4	328417	ENSMUSG00000054509
A_51_P234544	NA	Azin1	antizyme inhibitor 1	54375	ENSMUSG00000037458
A_55_P2141943	NA	Ube2l6	ubiquitin-conjugating enzyme E2L 6	56791	ENSMUSG00000027078
A_55_P2137431	NA	Rtel1	regulator of telomere elongation helicase 1	269400	ENSMUSG00000038685
A_51_P314161	NA	Qtrt1	queuine tRNA-ribosyltransferase 1	60507	ENSMUSG00000002825
A_55_P2114596	NA	Zfp161	zinc finger protein 161	22666	ENSMUSG00000049672
A_55_P2093163	NA	Zfp161	zinc finger protein 161	22666	ENSMUSG00000049672
A_55_P2055257	NA	Maoa	monoamine oxidase A	17161	ENSMUSG00000025037
A_55_P2130256	NA	Polr2l	polymerase (RNA) II (DNA directed) polypeptide L	66491	ENSMUSG00000038489
A_51_P461429	NA	Cyp7b1	cytochrome P450, family 7, subfamily b, polypeptide 1	13123	ENSMUSG00000039519
A_52_P191086	NA	Kcnj6	potassium inwardly-rectifying channel, subfamily J, member 6	16522	ENSMUSG00000043301
A_55_P1975140	NA	Acvr1c	activin A receptor, type IC	269275	ENSMUSG00000026834
A_55_P2064203	NA	Acvr1c	activin A receptor, type IC	269275	ENSMUSG00000026834
A_52_P483129	NA	Utp23	UTP23, small subunit (SSU) processome component, homolog (yeast)	78581	ENSMUSG00000022313
A_51_P425824	NA	Fam132a	family with sequence similarity 132, member A	67389	ENSMUSG00000023571
A_55_P2053241	NA	Gng4	guanine nucleotide binding protein (G protein), gamma 4	14706	ENSMUSG00000021303
A_51_P476261	NA	Zfp120	zinc finger protein 120	104348	ENSMUSG00000068134
A_55_P2015520	NA	Plekha1	pleckstrin homology domain containing, family A (phosphoinositide binding specific) member 1	101476	ENSMUSG00000040268
A_55_P2156855	NA	Car13	carbonic anhydrase 13	71934	ENSMUSG00000027555
A_52_P559919	NA	Eif2ak2	eukaryotic translation initiation factor 2-alpha kinase 2	19106	ENSMUSG00000024079
A_55_P2002727	NA	Inpp4a	inositol polyphosphate-4-phosphatase, type I	269180	ENSMUSG00000026113
A_55_P2060107	NA	Pkm	pyruvate kinase, muscle	18746	ENSMUSG00000032294
A_55_P2035667	NA	Gyk	glycerol kinase	14933	ENSMUSG00000025059
A_55_P2134496	NA	Amfr	autocrine motility factor receptor	23802	ENSMUSG00000031751
A_52_P585699	NA	Ciao1	cytosolic iron-sulfur protein assembly 1	26371	ENSMUSG00000003662
A_55_P2103060	NA	Pxk	PX domain containing serine/threonine kinase	218699	ENSMUSG00000033885
A_55_P2071466	NA	Ncf1	neutrophil cytosolic factor 1	17969	ENSMUSG00000015950
A_55_P1957739	NA	Guca2b	guanylate cyclase activator 2b (retina)	14916	ENSMUSG00000032978
A_52_P179068	NA	Gucy1b3	guanylate cyclase 1, soluble, beta 3	54195	ENSMUSG00000028005
A_55_P2046793	NA	Eogt	EGF domain-specific O-linked N-acetylglucosamine (GlcNAc) transferase	101351	ENSMUSG00000035245
A_55_P2146314	NA	Lmx1a	LIM homeobox transcription factor 1 alpha	110648	ENSMUSG00000026686
A_52_P270145	NA	Zfp329	zinc finger protein 329	67230	ENSMUSG00000057894
A_55_P2049252	NA	Mapkapk5	MAP kinase-activated protein kinase 5	17165	ENSMUSG00000029454
A_55_P2020602	NA	Pacsin1	protein kinase C and casein kinase substrate in neurons 1	23969	ENSMUSG00000040276
A_51_P285779	NA	Asphd2	aspartate beta-hydroxylase domain containing 2	72898	ENSMUSG00000029348
A_51_P518488	NA	Atpif1	ATPase inhibitory factor 1	11983	ENSMUSG00000054428
A_51_P483473	NA	St3gal5	ST3 beta-galactoside alpha-2,3-sialyltransferase 5	20454	ENSMUSG00000056091
A_52_P667287	NA	Lass6	LAG1 homolog, ceramide synthase 6	241447	ENSMUSG00000027035
A_55_P2138956	NA	Tpk1	thiamine pyrophosphokinase	29807	ENSMUSG00000029735
A_51_P106952	NA	Rbm26	RNA binding motif protein 26	74213	ENSMUSG00000022119
A_55_P1965876	NA	Opn1mw	opsin 1 (cone pigments), medium-wave-sensitive (color blindness, deutan)	14539	ENSMUSG00000031394
A_55_P1959238	NA	Nagk	N-acetylglucosamine kinase	56174	ENSMUSG00000034744
A_55_P2122605	NA	Cbr2	carbonyl reductase 2	12409	ENSMUSG00000025150
A_55_P2122604	NA	Cbr2	carbonyl reductase 2	12409	ENSMUSG00000025150
A_52_P356204	NA	Nostrin	nitric oxide synthase trafficker	329416	ENSMUSG00000034738
A_55_P2152962	NA	Mtr	5-methyltetrahydrofolate-homocysteine methyltransferase	238505	ENSMUSG00000021311
A_55_P2080130	NA	Aim2	absent in melanoma 2	383619	ENSMUSG00000037860
A_51_P451075	NA	Atp2a2	ATPase, Ca++ transporting, cardiac muscle, slow twitch 2	11938	ENSMUSG00000029467
A_55_P2162807	NA	Pla2g2e	phospholipase A2, group IIE	26970	ENSMUSG00000028751
A_66_P113008	NA	Pla2g2e	phospholipase A2, group IIE	26970	ENSMUSG00000028751
A_52_P494115	NA	Gatad2b	GATA zinc finger domain containing 2B	229542	ENSMUSG00000042390
A_55_P1953961	NA	Cdkl3	cyclin-dependent kinase-like 3	213084	ENSMUSG00000020389
A_55_P2142439	NA	Echdc2	enoyl Coenzyme A hydratase domain containing 2	52430	ENSMUSG00000028601
A_55_P2174967	NA	Elac2	elaC homolog 2 (E. coli)	68626	ENSMUSG00000020549
A_51_P483280	NA	Prnp	prion protein	19122	ENSMUSG00000079037
A_66_P105175	NA	Bche	butyrylcholinesterase	12038	ENSMUSG00000027792
A_55_P2017312	NA	Eapp	E2F-associated phosphoprotein	66266	ENSMUSG00000054302
A_52_P649285	NA	Cdc26	cell division cycle 26	66440	ENSMUSG00000066149
A_52_P500002	NA	Tspyl5	testis-specific protein, Y-encoded-like 5	239364	ENSMUSG00000038984
A_52_P223521	NA	Brwd1	bromodomain and WD repeat domain containing 1	93871	ENSMUSG00000022914
A_51_P408584	NA	Enpp1	ectonucleotide pyrophosphatase/phosphodiesterase 1	18605	ENSMUSG00000037370
A_51_P506045	NA	Pgcp	plasma glutamate carboxypeptidase	54381	ENSMUSG00000039007
A_55_P2041529	NA	Eya4	eyes absent 4 homolog (Drosophila)	14051	ENSMUSG00000010461
A_55_P2008790	NA	Zfp30	zinc finger protein 30	22693	ENSMUSG00000047473
A_55_P2081616	NA	Timeless	timeless homolog (Drosophila)	21853	ENSMUSG00000039994
A_55_P1982585	NA	Kdm4a	lysine (K)-specific demethylase 4A	230674	ENSMUSG00000033326
A_55_P1988058	NA	Tyw3	tRNA-yW synthesizing protein 3 homolog (S. cerevisiae)	209584	ENSMUSG00000047583
A_55_P1979620	NA	Eif3h	eukaryotic translation initiation factor 3, subunit H	68135	ENSMUSG00000022312
A_55_P2084332	NA	Pigp	phosphatidylinositol glycan anchor biosynthesis, class P	56176	ENSMUSG00000022940
A_55_P1962946	NA	Syk	spleen tyrosine kinase	20963	ENSMUSG00000021457
A_51_P339822	NA	Arhgap4	Rho GTPase activating protein 4	171207	ENSMUSG00000031389
A_55_P2147220	NA	Ak2	adenylate kinase 2	11637	ENSMUSG00000028792
A_55_P2143119	NA	Ddx39b	DEAD (Asp-Glu-Ala-Asp) box polypeptide 39B	53817	ENSMUSG00000019432
A_55_P2130501	NA	Fndc1	fibronectin type III domain containing 1	68655	ENSMUSG00000071984
A_51_P117226	NA	Zdhhc2	zinc finger, DHHC domain containing 2	70546	ENSMUSG00000039470
A_52_P651248	NA	Zdhhc2	zinc finger, DHHC domain containing 2	70546	ENSMUSG00000039470
A_55_P2148082	NA	Larp7	La ribonucleoprotein domain family, member 7	28036	ENSMUSG00000027968
A_52_P491073	NA	Nek8	NIMA (never in mitosis gene a)-related expressed kinase 8	140859	ENSMUSG00000017405
A_51_P129149	NA	Gatad2a	GATA zinc finger domain containing 2A	234366	ENSMUSG00000036180
A_51_P388374	NA	Ppil4	peptidylprolyl isomerase (cyclophilin)-like 4	67418	ENSMUSG00000015757
A_55_P1991851	NA	Speg	SPEG complex locus	11790	ENSMUSG00000026207
A_55_P2020050	NA	Itga6	integrin alpha 6	16403	ENSMUSG00000027111
A_55_P2060498	NA	Zfp553	zinc finger protein 553	233887	ENSMUSG00000045598
A_55_P2007646	NA	Cryaa	crystallin, alpha A	12954	ENSMUSG00000024041
A_55_P2031636	NA	Igf1	insulin-like growth factor 1	16000	ENSMUSG00000020053
A_51_P474454	NA	Rnaseh2b	ribonuclease H2, subunit B	67153	ENSMUSG00000021932
A_52_P76402	NA	Eif2c1	eukaryotic translation initiation factor 2C, 1	236511	ENSMUSG00000041530
A_55_P1976690	NA	Snrnp35	small nuclear ribonucleoprotein 35 (U11/U12)	76167	ENSMUSG00000029402
A_55_P1997424	NA	Cwc22	CWC22 spliceosome-associated protein homolog (S. cerevisiae)	80744	ENSMUSG00000027014
A_52_P20357	NA	Aqr	aquarius	11834	ENSMUSG00000040383
A_51_P328968	NA	Zfp322a	zinc finger protein 322A	218100	ENSMUSG00000046351
A_51_P223575	NA	Tbc1d23	TBC1 domain family, member 23	67581	ENSMUSG00000022749
A_55_P1990849	NA	Dclre1b	DNA cross-link repair 1B, PSO2 homolog (S. cerevisiae)	140917	ENSMUSG00000027845
A_51_P150120	NA	Mgst2	microsomal glutathione S-transferase 2	211666	ENSMUSG00000074604
A_51_P428742	NA	Pus7l	pseudouridylate synthase 7 homolog (S. cerevisiae)-like	78895	ENSMUSG00000033356
A_51_P189943	NA	Dscam	Down syndrome cell adhesion molecule	13508	ENSMUSG00000050272
A_51_P284823	NA	Polr1b	polymerase (RNA) I polypeptide B	20017	ENSMUSG00000027395
A_55_P2144766	NA	Pigc	phosphatidylinositol glycan anchor biosynthesis, class C	67292	ENSMUSG00000026698
A_55_P1969058	NA	Epha7	Eph receptor A7	13841	ENSMUSG00000028289
A_55_P1953919	NA	Me3	malic enzyme 3, NADP(+)-dependent, mitochondrial	109264	ENSMUSG00000030621
A_52_P537852	NA	Fam120b	family with sequence similarity 120B	67544	ENSMUSG00000014763
A_55_P2075200	NA	Tor3a	torsin family 3, member A	30935	ENSMUSG00000060519
A_55_P2130610	NA	Smc3	structural maintenance of chromosomes 3	13006	ENSMUSG00000024974
A_55_P2051914	NA	Zfp568	zinc finger protein 568	243905	ENSMUSG00000074221
A_55_P2119463	NA	Ggh	gamma-glutamyl hydrolase	14590	ENSMUSG00000073987
A_51_P438952	NA	Bag4	BCL2-associated athanogene 4	67384	ENSMUSG00000037316
A_66_P134090	NA	Grpel2	GrpE-like 2, mitochondrial	17714	ENSMUSG00000024580
A_55_P2073647	NA	Elp2	elongator acetyltransferase complex subunit 2	58523	ENSMUSG00000024271
A_55_P2066230	NA	Hck	hemopoietic cell kinase	15162	ENSMUSG00000003283
A_55_P2171413	NA	Me1	malic enzyme 1, NADP(+)-dependent, cytosolic	17436	ENSMUSG00000032418
A_55_P2009952	NA	Me1	malic enzyme 1, NADP(+)-dependent, cytosolic	17436	ENSMUSG00000032418
A_55_P2059337	NA	Fastk	Fas-activated serine/threonine kinase	66587	ENSMUSG00000028959
A_55_P1981050	NA	Gemin8	gem (nuclear organelle) associated protein 8	237221	ENSMUSG00000040621
A_51_P327188	NA	Senp1	SUMO1/sentrin specific peptidase 1	223870	ENSMUSG00000033075
A_52_P575771	NA	Mtfr1	mitochondrial fission regulator 1	67472	ENSMUSG00000027601
A_55_P1977473	NA	Dab2	disabled 2, mitogen-responsive phosphoprotein	13132	ENSMUSG00000022150
A_52_P470466	NA	D3Bwg0562e	DNA segment, Chr 3, Brigham & Women's Genetics 0562 expressed	229791	ENSMUSG00000044667
A_66_P123787	NA	Lars2	leucyl-tRNA synthetase, mitochondrial	102436	ENSMUSG00000035202
A_55_P2104327	NA	Pxdn	peroxidasin homolog (Drosophila)	69675	ENSMUSG00000020674
A_55_P2074631	NA	Cpeb1	cytoplasmic polyadenylation element binding protein 1	12877	ENSMUSG00000025586
A_55_P2075127	NA	Pax2	paired box gene 2	18504	ENSMUSG00000004231
A_55_P2049388	NA	Zfp28	zinc finger protein 28	22690	ENSMUSG00000062861
A_55_P2122200	NA	Prkar2b	protein kinase, cAMP dependent regulatory, type II beta	19088	ENSMUSG00000002997
A_51_P436483	NA	Kin	antigenic determinant of rec-A protein	16588	ENSMUSG00000037262
A_52_P48546	NA	Rnf41	ring finger protein 41	67588	ENSMUSG00000025373
A_52_P508974	NA	Igf2bp3	insulin-like growth factor 2 mRNA binding protein 3	140488	ENSMUSG00000029814
A_52_P427240	NA	Ltn1	listerin E3 ubiquitin protein ligase 1	78913	ENSMUSG00000052299
A_51_P122141	NA	Mamstr	MEF2 activating motif and SAP domain containing transcriptional regulator	74490	ENSMUSG00000042918
A_51_P156158	NA	Phlpp1	PH domain and leucine rich repeat protein phosphatase 1	98432	ENSMUSG00000044340
A_51_P466221	NA	Amhr2	anti-Mullerian hormone type 2 receptor	110542	ENSMUSG00000023047
A_51_P396385	NA	Mars2	methionine-tRNA synthetase 2 (mitochondrial)	212679	ENSMUSG00000046994
A_66_P139159	NA	Hras1	Harvey rat sarcoma virus oncogene 1	15461	ENSMUSG00000025499
A_55_P2013858	NA	Acad8	acyl-Coenzyme A dehydrogenase family, member 8	66948	ENSMUSG00000031969
A_52_P156190	NA	Ednra	endothelin receptor type A	13617	ENSMUSG00000031616
A_55_P1996299	NA	Pofut1	protein O-fucosyltransferase 1	140484	ENSMUSG00000046020
A_55_P2185950	NA	Bpnt1	bisphosphate 3'-nucleotidase 1	23827	ENSMUSG00000026617
A_55_P2051778	NA	Sult2b1	sulfotransferase family, cytosolic, 2B, member 1	54200	ENSMUSG00000003271
A_55_P2120433	NA	Wdr12	WD repeat domain 12	57750	ENSMUSG00000026019
A_51_P235687	NA	Alox5ap	arachidonate 5-lipoxygenase activating protein	11690	ENSMUSG00000060063
A_51_P484842	NA	Asgr2	asialoglycoprotein receptor 2	11890	ENSMUSG00000040963
A_51_P155174	NA	Zfp672	zinc finger protein 672	319475	ENSMUSG00000049755
A_52_P86073	NA	Mrpl1	mitochondrial ribosomal protein L1	94061	ENSMUSG00000029486
A_55_P2003483	NA	Gldc	glycine decarboxylase	104174	ENSMUSG00000024827
A_55_P2165239	NA	Abl1	c-abl oncogene 1, non-receptor tyrosine kinase	11350	ENSMUSG00000026842
A_55_P2112120	NA	Tnk2	tyrosine kinase, non-receptor, 2	51789	ENSMUSG00000022791
A_55_P2151689	NA	Traf6	TNF receptor-associated factor 6	22034	ENSMUSG00000027164
A_51_P340402	NA	Eefsec	eukaryotic elongation factor, selenocysteine-tRNA-specific	65967	ENSMUSG00000033216
A_55_P2379599	NA	Asph	aspartate-beta-hydroxylase	65973	ENSMUSG00000028207
A_55_P2076288	NA	Zfp661	zinc finger protein 661	72180	ENSMUSG00000034800
A_55_P2124425	NA	Zfp661	zinc finger protein 661	72180	ENSMUSG00000034800
A_52_P330395	NA	Farp1	FERM, RhoGEF (Arhgef) and pleckstrin domain protein 1 (chondrocyte-derived)	223254	ENSMUSG00000025555
A_55_P2034260	NA	Ctdsp1	CTD (carboxy-terminal domain, RNA polymerase II, polypeptide A) small phosphatase 1	227292	ENSMUSG00000026176
A_51_P491051	NA	Ints9	integrator complex subunit 9	210925	ENSMUSG00000021975
A_55_P2158483	NA	Nkiras2	NFKB inhibitor interacting Ras-like protein 2	71966	ENSMUSG00000017837
A_52_P235278	NA	Pms1	postmeiotic segregation increased 1 (S. cerevisiae)	227099	ENSMUSG00000026098
A_66_P105307	NA	Adnp	activity-dependent neuroprotective protein	11538	ENSMUSG00000051149
A_52_P359502	NA	Pdxk	pyridoxal (pyridoxine, vitamin B6) kinase	216134	ENSMUSG00000032788
A_65_P18981	NA	Palb2	partner and localizer of BRCA2	233826	ENSMUSG00000044702
A_55_P2051313	NA	Gstk1	glutathione S-transferase kappa 1	76263	ENSMUSG00000029864
A_52_P459929	NA	Itga1	integrin alpha 1	109700	ENSMUSG00000042284
A_55_P2100715	NA	Auh	AU RNA binding protein/enoyl-coenzyme A hydratase	11992	ENSMUSG00000021460
A_55_P2069885	NA	Slc50a1	solute carrier family 50 (sugar transporter), member 1	19729	ENSMUSG00000027953
A_51_P201480	NA	Stat3	signal transducer and activator of transcription 3	20848	ENSMUSG00000004040
A_51_P511899	NA	Mthfsd	methenyltetrahydrofolate synthetase domain containing	234814	ENSMUSG00000031816
A_55_P1965655	NA	Mtmr14	myotubularin related protein 14	97287	ENSMUSG00000030269
A_51_P104933	NA	Trub2	TruB pseudouridine (psi) synthase homolog 2 (E. coli)	227682	ENSMUSG00000039826
A_55_P1986351	NA	D630037F22Rik	RIKEN cDNA D630037F22 gene	544696	ENSMUSG00000038122
A_51_P452768	NA	Cyp4f14	cytochrome P450, family 4, subfamily f, polypeptide 14	64385	ENSMUSG00000024292
A_55_P1957249	NA	Pdgfrb	platelet derived growth factor receptor, beta polypeptide	18596	ENSMUSG00000024620
A_55_P2067116	NA	Dclre1c	DNA cross-link repair 1C, PSO2 homolog (S. cerevisiae)	227525	ENSMUSG00000026648
A_55_P1954835	NA	Ramp3	receptor (calcitonin) activity modifying protein 3	56089	ENSMUSG00000041046
A_55_P2101340	NA	Ramp3	receptor (calcitonin) activity modifying protein 3	56089	ENSMUSG00000041046
A_51_P481159	NA	Cbr3	carbonyl reductase 3	109857	ENSMUSG00000022947
A_55_P1953723	NA	Rab13	RAB13, member RAS oncogene family	68328	ENSMUSG00000027935
A_51_P447668	NA	Ptpn12	protein tyrosine phosphatase, non-receptor type 12	19248	ENSMUSG00000028771
A_65_P19112	NA	Zfp397	zinc finger protein 397	69256	ENSMUSG00000024276
A_55_P2044463	NA	Lipt2	lipoyl(octanoyl) transferase 2 (putative)	67164	ENSMUSG00000030725
A_55_P2155002	NA	Ccdc23	coiled-coil domain containing 23	69216	ENSMUSG00000028643
A_55_P2159830	NA	Yaf2	YY1 associated factor 2	67057	ENSMUSG00000022634
A_55_P1999309	NA	Zfp668	zinc finger protein 668	244219	ENSMUSG00000049728
A_55_P1957319	NA	Krr1	KRR1, small subunit (SSU) processome component, homolog (yeast)	52705	ENSMUSG00000063334
A_55_P2166501	NA	Cd44	CD44 antigen	12505	ENSMUSG00000005087
A_55_P2015687	NA	D14Ertd668e	DNA segment, Chr 14, ERATO Doi 668, expressed	219132	ENSMUSG00000068245
A_55_P2104835	NA	P2rx4	purinergic receptor P2X, ligand-gated ion channel 4	18438	ENSMUSG00000029470
A_51_P229655	NA	Acsm5	acyl-CoA synthetase medium-chain family member 5	272428	ENSMUSG00000030972
biological process	organonitrogen compound metabolic process	GO:1901564
C=1411;O=61;E=35.13;R=1.74;rawP=1.99e-05;adjP=0.0060
A_52_P478236	NA	Wrn	Werner syndrome homolog (human)	22427	ENSMUSG00000031583
A_51_P396385	NA	Mars2	methionine-tRNA synthetase 2 (mitochondrial)	212679	ENSMUSG00000046994
A_55_P2097729	NA	Gtpbp4	GTP binding protein 4	69237	ENSMUSG00000021149
A_55_P1996674	NA	Itih3	inter-alpha trypsin inhibitor, heavy chain 3	16426	ENSMUSG00000006522
A_66_P139159	NA	Hras1	Harvey rat sarcoma virus oncogene 1	15461	ENSMUSG00000025499
A_55_P2013858	NA	Acad8	acyl-Coenzyme A dehydrogenase family, member 8	66948	ENSMUSG00000031969
A_51_P505662	NA	4933437F05Rik	RIKEN cDNA 4933437F05 gene	71275	ENSMUSG00000072919
A_66_P106836	NA	Kmo	kynurenine 3-monooxygenase (kynurenine 3-hydroxylase)	98256	ENSMUSG00000039783
A_51_P234544	NA	Azin1	antizyme inhibitor 1	54375	ENSMUSG00000037458
A_52_P156190	NA	Ednra	endothelin receptor type A	13617	ENSMUSG00000031616
A_51_P314161	NA	Qtrt1	queuine tRNA-ribosyltransferase 1	60507	ENSMUSG00000002825
A_51_P339822	NA	Arhgap4	Rho GTPase activating protein 4	171207	ENSMUSG00000031389
A_55_P2147220	NA	Ak2	adenylate kinase 2	11637	ENSMUSG00000028792
A_55_P2055257	NA	Maoa	monoamine oxidase A	17161	ENSMUSG00000025037
A_52_P191086	NA	Kcnj6	potassium inwardly-rectifying channel, subfamily J, member 6	16522	ENSMUSG00000043301
A_55_P2074366	NA	Yars	tyrosyl-tRNA synthetase	107271	ENSMUSG00000028811
A_55_P2003483	NA	Gldc	glycine decarboxylase	104174	ENSMUSG00000024827
A_55_P2053241	NA	Gng4	guanine nucleotide binding protein (G protein), gamma 4	14706	ENSMUSG00000021303
A_55_P2031636	NA	Igf1	insulin-like growth factor 1	16000	ENSMUSG00000020053
A_55_P2060107	NA	Pkm	pyruvate kinase, muscle	18746	ENSMUSG00000032294
A_55_P2158483	NA	Nkiras2	NFKB inhibitor interacting Ras-like protein 2	71966	ENSMUSG00000017837
A_55_P2103060	NA	Pxk	PX domain containing serine/threonine kinase	218699	ENSMUSG00000033885
A_66_P105307	NA	Adnp	activity-dependent neuroprotective protein	11538	ENSMUSG00000051149
A_52_P359502	NA	Pdxk	pyridoxal (pyridoxine, vitamin B6) kinase	216134	ENSMUSG00000032788
A_51_P400463	NA	Agmat	agmatine ureohydrolase (agmatinase)	75986	ENSMUSG00000040706
A_55_P2071466	NA	Ncf1	neutrophil cytosolic factor 1	17969	ENSMUSG00000015950
A_51_P223575	NA	Tbc1d23	TBC1 domain family, member 23	67581	ENSMUSG00000022749
A_55_P2051313	NA	Gstk1	glutathione S-transferase kappa 1	76263	ENSMUSG00000029864
A_55_P1954945	NA	Lyg1	lysozyme G-like 1	69541	ENSMUSG00000026085
A_55_P1957739	NA	Guca2b	guanylate cyclase activator 2b (retina)	14916	ENSMUSG00000032978
A_52_P179068	NA	Gucy1b3	guanylate cyclase 1, soluble, beta 3	54195	ENSMUSG00000028005
A_51_P150120	NA	Mgst2	microsomal glutathione S-transferase 2	211666	ENSMUSG00000074604
A_55_P2100715	NA	Auh	AU RNA binding protein/enoyl-coenzyme A hydratase	11992	ENSMUSG00000021460
A_55_P2237129	NA	St6galnac5	ST6 (alpha-N-acetyl-neuraminyl-2,3-beta-galactosyl-1,3)-N-acetylgalactosaminide alpha-2,6-sialyltransferase 5	26938	ENSMUSG00000039037
A_51_P511899	NA	Mthfsd	methenyltetrahydrofolate synthetase domain containing	234814	ENSMUSG00000031816
A_51_P424532	NA	Vnn1	vanin 1	22361	ENSMUSG00000037440
A_55_P1986351	NA	D630037F22Rik	RIKEN cDNA D630037F22 gene	544696	ENSMUSG00000038122
A_52_P439263	NA	Ugt8a	UDP galactosyltransferase 8A	22239	ENSMUSG00000032854
A_52_P667287	NA	Lass6	LAG1 homolog, ceramide synthase 6	241447	ENSMUSG00000027035
A_55_P2138956	NA	Tpk1	thiamine pyrophosphokinase	29807	ENSMUSG00000029735
A_55_P2119463	NA	Ggh	gamma-glutamyl hydrolase	14590	ENSMUSG00000073987
A_55_P2122605	NA	Cbr2	carbonyl reductase 2	12409	ENSMUSG00000025150
A_55_P2122604	NA	Cbr2	carbonyl reductase 2	12409	ENSMUSG00000025150
A_55_P1957249	NA	Pdgfrb	platelet derived growth factor receptor, beta polypeptide	18596	ENSMUSG00000024620
A_52_P266530	NA	Ide	insulin degrading enzyme	15925	ENSMUSG00000056999
A_55_P1992319	NA	Col4a3bp	collagen, type IV, alpha 3 (Goodpasture antigen) binding protein	68018	ENSMUSG00000021669
A_55_P2152962	NA	Mtr	5-methyltetrahydrofolate-homocysteine methyltransferase	238505	ENSMUSG00000021311
A_51_P334789	NA	Nudt16	nudix (nucleoside diphosphate linked moiety X)-type motif 16	75686	ENSMUSG00000032565
A_51_P350048	NA	Gstt2	glutathione S-transferase, theta 2	14872	ENSMUSG00000033318
A_55_P1953723	NA	Rab13	RAB13, member RAS oncogene family	68328	ENSMUSG00000027935
A_51_P451075	NA	Atp2a2	ATPase, Ca++ transporting, cardiac muscle, slow twitch 2	11938	ENSMUSG00000029467
A_51_P108659	NA	Pon1	paraoxonase 1	18979	ENSMUSG00000002588
A_55_P1963031	NA	Ampd2	adenosine monophosphate deaminase 2	109674	ENSMUSG00000027889
A_51_P412809	NA	Dqx1	DEAQ RNA-dependent ATPase	93838	ENSMUSG00000009145
A_55_P2166501	NA	Cd44	CD44 antigen	12505	ENSMUSG00000005087
A_66_P123787	NA	Lars2	leucyl-tRNA synthetase, mitochondrial	102436	ENSMUSG00000035202
A_51_P180452	NA	Crk	v-crk sarcoma virus CT10 oncogene homolog (avian)	12928	ENSMUSG00000017776
A_66_P105175	NA	Bche	butyrylcholinesterase	12038	ENSMUSG00000027792
A_55_P1984023	NA	Arrb2	arrestin, beta 2	216869	ENSMUSG00000060216
A_55_P2106922	NA	Arfgap3	ADP-ribosylation factor GTPase activating protein 3	66251	ENSMUSG00000054277
A_55_P2120956	NA	Arfgap3	ADP-ribosylation factor GTPase activating protein 3	66251	ENSMUSG00000054277
A_51_P408584	NA	Enpp1	ectonucleotide pyrophosphatase/phosphodiesterase 1	18605	ENSMUSG00000037370
A_51_P506045	NA	Pgcp	plasma glutamate carboxypeptidase	54381	ENSMUSG00000039007
biological process	primary metabolic process	GO:0044238
C=7662;O=235;E=190.76;R=1.23;rawP=6.37e-05;adjP=0.0164
A_52_P478236	NA	Wrn	Werner syndrome homolog (human)	22427	ENSMUSG00000031583
A_55_P2149269	NA	Galt	galactose-1-phosphate uridyl transferase	14430	ENSMUSG00000036073
A_55_P2118799	NA	Rmi1	RMI1, RecQ mediated genome instability 1, homolog (S. cerevisiae)	74386	ENSMUSG00000035367
A_51_P178828	NA	Mbl2	mannose-binding lectin (protein C) 2	17195	ENSMUSG00000024863
A_55_P1961140	NA	Mettl3	methyltransferase like 3	56335	ENSMUSG00000022160
A_55_P2097729	NA	Gtpbp4	GTP binding protein 4	69237	ENSMUSG00000021149
A_55_P1998354	NA	Wbp4	WW domain binding protein 4	22380	ENSMUSG00000022023
A_51_P505662	NA	4933437F05Rik	RIKEN cDNA 4933437F05 gene	71275	ENSMUSG00000072919
A_66_P106836	NA	Kmo	kynurenine 3-monooxygenase (kynurenine 3-hydroxylase)	98256	ENSMUSG00000039783
A_55_P1954569	NA	Hmgcs1	3-hydroxy-3-methylglutaryl-Coenzyme A synthase 1	208715	ENSMUSG00000093930
A_55_P2012552	NA	Nap1l5	nucleosome assembly protein 1-like 5	58243	ENSMUSG00000055430
A_55_P2078084	NA	Gm13011	predicted gene 13011	242711	ENSMUSG00000078520
A_55_P2045792	NA	Pes1	pescadillo homolog 1, containing BRCT domain (zebrafish)	64934	ENSMUSG00000020430
A_51_P289742	NA	Slc27a5	solute carrier family 27 (fatty acid transporter), member 5	26459	ENSMUSG00000030382
A_55_P2074366	NA	Yars	tyrosyl-tRNA synthetase	107271	ENSMUSG00000028811
A_55_P2324712	NA	Dmrt1	doublesex and mab-3 related transcription factor 1	50796	ENSMUSG00000024837
A_55_P2061094	NA	Fnta	farnesyltransferase, CAAX box, alpha	14272	ENSMUSG00000015994
A_55_P2117903	NA	Stard5	StAR-related lipid transfer (START) domain containing 5	170460	ENSMUSG00000046027
A_66_P107038	NA	Prcp	prolylcarboxypeptidase (angiotensinase C)	72461	ENSMUSG00000061119
A_51_P232858	NA	Rpl14	ribosomal protein L14	67115	ENSMUSG00000025794
A_51_P379710	NA	Rpn1	ribophorin I	103963	ENSMUSG00000030062
A_51_P235440	NA	Pelp1	proline, glutamic acid and leucine rich protein 1	75273	ENSMUSG00000018921
A_51_P379083	NA	Adam24	a disintegrin and metallopeptidase domain 24 (testase 1)	13526	ENSMUSG00000046723
A_55_P1966878	NA	Rnaseh2a	ribonuclease H2, large subunit	69724	ENSMUSG00000052926
A_55_P2120615	NA	Ssh3	slingshot homolog 3 (Drosophila)	245857	ENSMUSG00000034616
A_51_P441469	NA	Jmy	junction-mediating and regulatory protein	57748	ENSMUSG00000021690
A_55_P2151609	NA	Sorl1	sortilin-related receptor, LDLR class A repeats-containing	20660	ENSMUSG00000049313
A_55_P2016346	NA	Eif3d	eukaryotic translation initiation factor 3, subunit D	55944	ENSMUSG00000016554
A_55_P2237129	NA	St6galnac5	ST6 (alpha-N-acetyl-neuraminyl-2,3-beta-galactosyl-1,3)-N-acetylgalactosaminide alpha-2,6-sialyltransferase 5	26938	ENSMUSG00000039037
A_55_P1966755	NA	Cyp2r1	cytochrome P450, family 2, subfamily r, polypeptide 1	244209	ENSMUSG00000030670
A_55_P1970299	NA	Mttp	microsomal triglyceride transfer protein	17777	ENSMUSG00000028158
A_52_P211418	NA	G2e3	G2/M-phase specific E3 ubiquitin ligase	217558	ENSMUSG00000035293
A_55_P2107957	NA	Fam175a	family with sequence similarity 175, member A	70681	ENSMUSG00000035234
A_52_P439263	NA	Ugt8a	UDP galactosyltransferase 8A	22239	ENSMUSG00000032854
A_55_P2037712	NA	Smc4	structural maintenance of chromosomes 4	70099	ENSMUSG00000034349
A_66_P123683	NA	Nabp1	nucleic acid binding protein 1	109019	ENSMUSG00000026107
A_51_P362738	NA	Dusp18	dual specificity phosphatase 18	75219	ENSMUSG00000047205
A_51_P506683	NA	Fbxw7	F-box and WD-40 domain protein 7	50754	ENSMUSG00000028086
A_52_P266530	NA	Ide	insulin degrading enzyme	15925	ENSMUSG00000056999
A_55_P2001458	NA	Zscan29	zinc finger SCAN domains 29	99334	ENSMUSG00000050619
A_52_P249920	NA	Zscan29	zinc finger SCAN domains 29	99334	ENSMUSG00000050619
A_55_P1992319	NA	Col4a3bp	collagen, type IV, alpha 3 (Goodpasture antigen) binding protein	68018	ENSMUSG00000021669
A_52_P612382	NA	Cdc25b	cell division cycle 25B	12531	ENSMUSG00000027330
A_51_P334789	NA	Nudt16	nudix (nucleoside diphosphate linked moiety X)-type motif 16	75686	ENSMUSG00000032565
A_51_P394115	NA	Aadac	arylacetamide deacetylase (esterase)	67758	ENSMUSG00000027761
A_52_P556082	NA	Trmt2b	TRM2 tRNA methyltransferase 2 homolog B (S. cerevisiae)	215201	ENSMUSG00000067369
A_51_P108659	NA	Pon1	paraoxonase 1	18979	ENSMUSG00000002588
A_55_P2177899	NA	Dact1	dapper homolog 1, antagonist of beta-catenin (xenopus)	59036	ENSMUSG00000044548
A_52_P467046	NA	Wdr48	WD repeat domain 48	67561	ENSMUSG00000032512
A_55_P1963031	NA	Ampd2	adenosine monophosphate deaminase 2	109674	ENSMUSG00000027889
A_55_P2013569	NA	Agbl4	ATP/GTP binding protein-like 4	78933	ENSMUSG00000061298
A_51_P412809	NA	Dqx1	DEAQ RNA-dependent ATPase	93838	ENSMUSG00000009145
A_51_P180452	NA	Crk	v-crk sarcoma virus CT10 oncogene homolog (avian)	12928	ENSMUSG00000017776
A_51_P448814	NA	Zfp90	zinc finger protein 90	22751	ENSMUSG00000031907
A_55_P1984023	NA	Arrb2	arrestin, beta 2	216869	ENSMUSG00000060216
A_55_P2008452	NA	Wtap	Wilms' tumour 1-associating protein	60532	ENSMUSG00000060475
A_55_P1972054	NA	Capn10	calpain 10	23830	ENSMUSG00000026270
A_51_P510764	NA	Agmo	alkylglycerol monooxygenase	319660	ENSMUSG00000050103
A_55_P2106922	NA	Arfgap3	ADP-ribosylation factor GTPase activating protein 3	66251	ENSMUSG00000054277
A_55_P2120956	NA	Arfgap3	ADP-ribosylation factor GTPase activating protein 3	66251	ENSMUSG00000054277
A_55_P1992329	NA	Gmpr	guanosine monophosphate reductase	66355	ENSMUSG00000000253
A_52_P385536	NA	Ddx58	DEAD (Asp-Glu-Ala-Asp) box polypeptide 58	230073	ENSMUSG00000040296
A_51_P443293	NA	Decr2	2-4-dienoyl-Coenzyme A reductase 2, peroxisomal	26378	ENSMUSG00000036775
A_51_P450169	NA	Dnajb13	DnaJ (Hsp40) related, subfamily B, member 13	69387	ENSMUSG00000030708
A_52_P745	NA	Acox3	acyl-Coenzyme A oxidase 3, pristanoyl	80911	ENSMUSG00000029098
A_51_P343913	NA	Parp4	poly (ADP-ribose) polymerase family, member 4	328417	ENSMUSG00000054509
A_55_P2141943	NA	Ube2l6	ubiquitin-conjugating enzyme E2L 6	56791	ENSMUSG00000027078
A_55_P2137431	NA	Rtel1	regulator of telomere elongation helicase 1	269400	ENSMUSG00000038685
A_51_P314161	NA	Qtrt1	queuine tRNA-ribosyltransferase 1	60507	ENSMUSG00000002825
A_55_P2114596	NA	Zfp161	zinc finger protein 161	22666	ENSMUSG00000049672
A_55_P2093163	NA	Zfp161	zinc finger protein 161	22666	ENSMUSG00000049672
A_55_P2130256	NA	Polr2l	polymerase (RNA) II (DNA directed) polypeptide L	66491	ENSMUSG00000038489
A_51_P461429	NA	Cyp7b1	cytochrome P450, family 7, subfamily b, polypeptide 1	13123	ENSMUSG00000039519
A_55_P1975140	NA	Acvr1c	activin A receptor, type IC	269275	ENSMUSG00000026834
A_55_P2064203	NA	Acvr1c	activin A receptor, type IC	269275	ENSMUSG00000026834
A_52_P483129	NA	Utp23	UTP23, small subunit (SSU) processome component, homolog (yeast)	78581	ENSMUSG00000022313
A_51_P425824	NA	Fam132a	family with sequence similarity 132, member A	67389	ENSMUSG00000023571
A_55_P2053241	NA	Gng4	guanine nucleotide binding protein (G protein), gamma 4	14706	ENSMUSG00000021303
A_51_P476261	NA	Zfp120	zinc finger protein 120	104348	ENSMUSG00000068134
A_55_P2015520	NA	Plekha1	pleckstrin homology domain containing, family A (phosphoinositide binding specific) member 1	101476	ENSMUSG00000040268
A_52_P559919	NA	Eif2ak2	eukaryotic translation initiation factor 2-alpha kinase 2	19106	ENSMUSG00000024079
A_55_P2060107	NA	Pkm	pyruvate kinase, muscle	18746	ENSMUSG00000032294
A_55_P2035667	NA	Gyk	glycerol kinase	14933	ENSMUSG00000025059
A_55_P2134496	NA	Amfr	autocrine motility factor receptor	23802	ENSMUSG00000031751
A_52_P585699	NA	Ciao1	cytosolic iron-sulfur protein assembly 1	26371	ENSMUSG00000003662
A_55_P2103060	NA	Pxk	PX domain containing serine/threonine kinase	218699	ENSMUSG00000033885
A_55_P2071466	NA	Ncf1	neutrophil cytosolic factor 1	17969	ENSMUSG00000015950
A_55_P1957739	NA	Guca2b	guanylate cyclase activator 2b (retina)	14916	ENSMUSG00000032978
A_52_P179068	NA	Gucy1b3	guanylate cyclase 1, soluble, beta 3	54195	ENSMUSG00000028005
A_55_P2046793	NA	Eogt	EGF domain-specific O-linked N-acetylglucosamine (GlcNAc) transferase	101351	ENSMUSG00000035245
A_55_P2146314	NA	Lmx1a	LIM homeobox transcription factor 1 alpha	110648	ENSMUSG00000026686
A_52_P270145	NA	Zfp329	zinc finger protein 329	67230	ENSMUSG00000057894
A_55_P2049252	NA	Mapkapk5	MAP kinase-activated protein kinase 5	17165	ENSMUSG00000029454
A_52_P359965	NA	Cpd	carboxypeptidase D	12874	ENSMUSG00000020841
A_51_P285779	NA	Asphd2	aspartate beta-hydroxylase domain containing 2	72898	ENSMUSG00000029348
A_51_P518488	NA	Atpif1	ATPase inhibitory factor 1	11983	ENSMUSG00000054428
A_51_P483473	NA	St3gal5	ST3 beta-galactoside alpha-2,3-sialyltransferase 5	20454	ENSMUSG00000056091
A_51_P505322	NA	Mpnd	MPN domain containing	68047	ENSMUSG00000003199
A_52_P667287	NA	Lass6	LAG1 homolog, ceramide synthase 6	241447	ENSMUSG00000027035
A_51_P106952	NA	Rbm26	RNA binding motif protein 26	74213	ENSMUSG00000022119
A_55_P1965876	NA	Opn1mw	opsin 1 (cone pigments), medium-wave-sensitive (color blindness, deutan)	14539	ENSMUSG00000031394
A_55_P1959238	NA	Nagk	N-acetylglucosamine kinase	56174	ENSMUSG00000034744
A_55_P2122605	NA	Cbr2	carbonyl reductase 2	12409	ENSMUSG00000025150
A_55_P2122604	NA	Cbr2	carbonyl reductase 2	12409	ENSMUSG00000025150
A_52_P356204	NA	Nostrin	nitric oxide synthase trafficker	329416	ENSMUSG00000034738
A_65_P09523	NA	Scrn3	secernin 3	74616	ENSMUSG00000008226
A_55_P2152962	NA	Mtr	5-methyltetrahydrofolate-homocysteine methyltransferase	238505	ENSMUSG00000021311
A_55_P2080130	NA	Aim2	absent in melanoma 2	383619	ENSMUSG00000037860
A_51_P451075	NA	Atp2a2	ATPase, Ca++ transporting, cardiac muscle, slow twitch 2	11938	ENSMUSG00000029467
A_55_P1995404	NA	Cd59b	CD59b antigen	333883	ENSMUSG00000068686
A_55_P2162807	NA	Pla2g2e	phospholipase A2, group IIE	26970	ENSMUSG00000028751
A_66_P113008	NA	Pla2g2e	phospholipase A2, group IIE	26970	ENSMUSG00000028751
A_52_P494115	NA	Gatad2b	GATA zinc finger domain containing 2B	229542	ENSMUSG00000042390
A_55_P1953961	NA	Cdkl3	cyclin-dependent kinase-like 3	213084	ENSMUSG00000020389
A_55_P2142439	NA	Echdc2	enoyl Coenzyme A hydratase domain containing 2	52430	ENSMUSG00000028601
A_55_P2174967	NA	Elac2	elaC homolog 2 (E. coli)	68626	ENSMUSG00000020549
A_51_P483280	NA	Prnp	prion protein	19122	ENSMUSG00000079037
A_55_P2097178	NA	Idua	iduronidase, alpha-L-	15932	ENSMUSG00000033540
A_55_P2017312	NA	Eapp	E2F-associated phosphoprotein	66266	ENSMUSG00000054302
A_52_P649285	NA	Cdc26	cell division cycle 26	66440	ENSMUSG00000066149
A_52_P500002	NA	Tspyl5	testis-specific protein, Y-encoded-like 5	239364	ENSMUSG00000038984
A_52_P223521	NA	Brwd1	bromodomain and WD repeat domain containing 1	93871	ENSMUSG00000022914
A_51_P408584	NA	Enpp1	ectonucleotide pyrophosphatase/phosphodiesterase 1	18605	ENSMUSG00000037370
A_51_P506045	NA	Pgcp	plasma glutamate carboxypeptidase	54381	ENSMUSG00000039007
A_55_P2041529	NA	Eya4	eyes absent 4 homolog (Drosophila)	14051	ENSMUSG00000010461
A_55_P2008790	NA	Zfp30	zinc finger protein 30	22693	ENSMUSG00000047473
A_55_P2081616	NA	Timeless	timeless homolog (Drosophila)	21853	ENSMUSG00000039994
A_55_P2151556	NA	C8g	complement component 8, gamma polypeptide	69379	ENSMUSG00000015083
A_55_P1982585	NA	Kdm4a	lysine (K)-specific demethylase 4A	230674	ENSMUSG00000033326
A_55_P1988058	NA	Tyw3	tRNA-yW synthesizing protein 3 homolog (S. cerevisiae)	209584	ENSMUSG00000047583
A_55_P1979620	NA	Eif3h	eukaryotic translation initiation factor 3, subunit H	68135	ENSMUSG00000022312
A_55_P2084332	NA	Pigp	phosphatidylinositol glycan anchor biosynthesis, class P	56176	ENSMUSG00000022940
A_55_P1962946	NA	Syk	spleen tyrosine kinase	20963	ENSMUSG00000021457
A_51_P339822	NA	Arhgap4	Rho GTPase activating protein 4	171207	ENSMUSG00000031389
A_55_P2147220	NA	Ak2	adenylate kinase 2	11637	ENSMUSG00000028792
A_55_P2143119	NA	Ddx39b	DEAD (Asp-Glu-Ala-Asp) box polypeptide 39B	53817	ENSMUSG00000019432
A_55_P2130501	NA	Fndc1	fibronectin type III domain containing 1	68655	ENSMUSG00000071984
A_51_P117226	NA	Zdhhc2	zinc finger, DHHC domain containing 2	70546	ENSMUSG00000039470
A_52_P651248	NA	Zdhhc2	zinc finger, DHHC domain containing 2	70546	ENSMUSG00000039470
A_55_P2148082	NA	Larp7	La ribonucleoprotein domain family, member 7	28036	ENSMUSG00000027968
A_55_P1958447	NA	Prepl	prolyl endopeptidase-like	213760	ENSMUSG00000024127
A_52_P491073	NA	Nek8	NIMA (never in mitosis gene a)-related expressed kinase 8	140859	ENSMUSG00000017405
A_51_P329818	NA	Dpep3	dipeptidase 3	71854	ENSMUSG00000031898
A_51_P129149	NA	Gatad2a	GATA zinc finger domain containing 2A	234366	ENSMUSG00000036180
A_51_P388374	NA	Ppil4	peptidylprolyl isomerase (cyclophilin)-like 4	67418	ENSMUSG00000015757
A_55_P1991851	NA	Speg	SPEG complex locus	11790	ENSMUSG00000026207
A_55_P2020050	NA	Itga6	integrin alpha 6	16403	ENSMUSG00000027111
A_55_P2060498	NA	Zfp553	zinc finger protein 553	233887	ENSMUSG00000045598
A_55_P2007646	NA	Cryaa	crystallin, alpha A	12954	ENSMUSG00000024041
A_55_P2031636	NA	Igf1	insulin-like growth factor 1	16000	ENSMUSG00000020053
A_51_P474454	NA	Rnaseh2b	ribonuclease H2, subunit B	67153	ENSMUSG00000021932
A_52_P76402	NA	Eif2c1	eukaryotic translation initiation factor 2C, 1	236511	ENSMUSG00000041530
A_55_P1976690	NA	Snrnp35	small nuclear ribonucleoprotein 35 (U11/U12)	76167	ENSMUSG00000029402
A_52_P85765	NA	Stard6	StAR-related lipid transfer (START) domain containing 6	170461	ENSMUSG00000079608
A_55_P1997424	NA	Cwc22	CWC22 spliceosome-associated protein homolog (S. cerevisiae)	80744	ENSMUSG00000027014
A_52_P20357	NA	Aqr	aquarius	11834	ENSMUSG00000040383
A_55_P2040777	NA	Lipo1	lipase, member O1	381236	ENSMUSG00000024766
A_51_P328968	NA	Zfp322a	zinc finger protein 322A	218100	ENSMUSG00000046351
A_51_P223575	NA	Tbc1d23	TBC1 domain family, member 23	67581	ENSMUSG00000022749
A_65_P08971	NA	F3	coagulation factor III	14066	ENSMUSG00000028128
A_55_P1990849	NA	Dclre1b	DNA cross-link repair 1B, PSO2 homolog (S. cerevisiae)	140917	ENSMUSG00000027845
A_51_P428742	NA	Pus7l	pseudouridylate synthase 7 homolog (S. cerevisiae)-like	78895	ENSMUSG00000033356
A_51_P284823	NA	Polr1b	polymerase (RNA) I polypeptide B	20017	ENSMUSG00000027395
A_55_P2144766	NA	Pigc	phosphatidylinositol glycan anchor biosynthesis, class C	67292	ENSMUSG00000026698
A_55_P1969058	NA	Epha7	Eph receptor A7	13841	ENSMUSG00000028289
A_52_P537852	NA	Fam120b	family with sequence similarity 120B	67544	ENSMUSG00000014763
A_55_P2075200	NA	Tor3a	torsin family 3, member A	30935	ENSMUSG00000060519
A_55_P2130610	NA	Smc3	structural maintenance of chromosomes 3	13006	ENSMUSG00000024974
A_55_P2051914	NA	Zfp568	zinc finger protein 568	243905	ENSMUSG00000074221
A_55_P2119463	NA	Ggh	gamma-glutamyl hydrolase	14590	ENSMUSG00000073987
A_51_P438952	NA	Bag4	BCL2-associated athanogene 4	67384	ENSMUSG00000037316
A_66_P134090	NA	Grpel2	GrpE-like 2, mitochondrial	17714	ENSMUSG00000024580
A_55_P2073647	NA	Elp2	elongator acetyltransferase complex subunit 2	58523	ENSMUSG00000024271
A_55_P2066230	NA	Hck	hemopoietic cell kinase	15162	ENSMUSG00000003283
A_55_P2059337	NA	Fastk	Fas-activated serine/threonine kinase	66587	ENSMUSG00000028959
A_55_P1981050	NA	Gemin8	gem (nuclear organelle) associated protein 8	237221	ENSMUSG00000040621
A_51_P327188	NA	Senp1	SUMO1/sentrin specific peptidase 1	223870	ENSMUSG00000033075
A_55_P1977473	NA	Dab2	disabled 2, mitogen-responsive phosphoprotein	13132	ENSMUSG00000022150
A_52_P470466	NA	D3Bwg0562e	DNA segment, Chr 3, Brigham & Women's Genetics 0562 expressed	229791	ENSMUSG00000044667
A_66_P123787	NA	Lars2	leucyl-tRNA synthetase, mitochondrial	102436	ENSMUSG00000035202
A_55_P2074631	NA	Cpeb1	cytoplasmic polyadenylation element binding protein 1	12877	ENSMUSG00000025586
A_55_P2075127	NA	Pax2	paired box gene 2	18504	ENSMUSG00000004231
A_55_P2049388	NA	Zfp28	zinc finger protein 28	22690	ENSMUSG00000062861
A_55_P2122200	NA	Prkar2b	protein kinase, cAMP dependent regulatory, type II beta	19088	ENSMUSG00000002997
A_51_P436483	NA	Kin	antigenic determinant of rec-A protein	16588	ENSMUSG00000037262
A_52_P48546	NA	Rnf41	ring finger protein 41	67588	ENSMUSG00000025373
A_52_P508974	NA	Igf2bp3	insulin-like growth factor 2 mRNA binding protein 3	140488	ENSMUSG00000029814
A_52_P427240	NA	Ltn1	listerin E3 ubiquitin protein ligase 1	78913	ENSMUSG00000052299
A_51_P122141	NA	Mamstr	MEF2 activating motif and SAP domain containing transcriptional regulator	74490	ENSMUSG00000042918
A_51_P156158	NA	Phlpp1	PH domain and leucine rich repeat protein phosphatase 1	98432	ENSMUSG00000044340
A_51_P466221	NA	Amhr2	anti-Mullerian hormone type 2 receptor	110542	ENSMUSG00000023047
A_51_P396385	NA	Mars2	methionine-tRNA synthetase 2 (mitochondrial)	212679	ENSMUSG00000046994
A_66_P139159	NA	Hras1	Harvey rat sarcoma virus oncogene 1	15461	ENSMUSG00000025499
A_55_P2013858	NA	Acad8	acyl-Coenzyme A dehydrogenase family, member 8	66948	ENSMUSG00000031969
A_52_P156190	NA	Ednra	endothelin receptor type A	13617	ENSMUSG00000031616
A_55_P1996299	NA	Pofut1	protein O-fucosyltransferase 1	140484	ENSMUSG00000046020
A_55_P2185950	NA	Bpnt1	bisphosphate 3'-nucleotidase 1	23827	ENSMUSG00000026617
A_55_P2051778	NA	Sult2b1	sulfotransferase family, cytosolic, 2B, member 1	54200	ENSMUSG00000003271
A_55_P2054315	NA	Mcpt2	mast cell protease 2	17225	ENSMUSG00000022226
A_55_P2120433	NA	Wdr12	WD repeat domain 12	57750	ENSMUSG00000026019
A_51_P235687	NA	Alox5ap	arachidonate 5-lipoxygenase activating protein	11690	ENSMUSG00000060063
A_51_P484842	NA	Asgr2	asialoglycoprotein receptor 2	11890	ENSMUSG00000040963
A_51_P155174	NA	Zfp672	zinc finger protein 672	319475	ENSMUSG00000049755
A_52_P510119	NA	Pgm2l1	phosphoglucomutase 2-like 1	70974	ENSMUSG00000030729
A_52_P86073	NA	Mrpl1	mitochondrial ribosomal protein L1	94061	ENSMUSG00000029486
A_55_P2003483	NA	Gldc	glycine decarboxylase	104174	ENSMUSG00000024827
A_55_P2165239	NA	Abl1	c-abl oncogene 1, non-receptor tyrosine kinase	11350	ENSMUSG00000026842
A_55_P2112120	NA	Tnk2	tyrosine kinase, non-receptor, 2	51789	ENSMUSG00000022791
A_55_P2151689	NA	Traf6	TNF receptor-associated factor 6	22034	ENSMUSG00000027164
A_51_P340402	NA	Eefsec	eukaryotic elongation factor, selenocysteine-tRNA-specific	65967	ENSMUSG00000033216
A_55_P2379599	NA	Asph	aspartate-beta-hydroxylase	65973	ENSMUSG00000028207
A_55_P2076288	NA	Zfp661	zinc finger protein 661	72180	ENSMUSG00000034800
A_55_P2124425	NA	Zfp661	zinc finger protein 661	72180	ENSMUSG00000034800
A_55_P2034260	NA	Ctdsp1	CTD (carboxy-terminal domain, RNA polymerase II, polypeptide A) small phosphatase 1	227292	ENSMUSG00000026176
A_51_P491051	NA	Ints9	integrator complex subunit 9	210925	ENSMUSG00000021975
A_55_P2158483	NA	Nkiras2	NFKB inhibitor interacting Ras-like protein 2	71966	ENSMUSG00000017837
A_52_P235278	NA	Pms1	postmeiotic segregation increased 1 (S. cerevisiae)	227099	ENSMUSG00000026098
A_66_P105307	NA	Adnp	activity-dependent neuroprotective protein	11538	ENSMUSG00000051149
A_65_P18981	NA	Palb2	partner and localizer of BRCA2	233826	ENSMUSG00000044702
A_52_P459929	NA	Itga1	integrin alpha 1	109700	ENSMUSG00000042284
A_55_P2100715	NA	Auh	AU RNA binding protein/enoyl-coenzyme A hydratase	11992	ENSMUSG00000021460
A_55_P2069885	NA	Slc50a1	solute carrier family 50 (sugar transporter), member 1	19729	ENSMUSG00000027953
A_51_P201480	NA	Stat3	signal transducer and activator of transcription 3	20848	ENSMUSG00000004040
A_55_P1973267	NA	Ddhd2	DDHD domain containing 2	72108	ENSMUSG00000061313
A_51_P104933	NA	Trub2	TruB pseudouridine (psi) synthase homolog 2 (E. coli)	227682	ENSMUSG00000039826
A_55_P1986351	NA	D630037F22Rik	RIKEN cDNA D630037F22 gene	544696	ENSMUSG00000038122
A_52_P136709	NA	Pctp	phosphatidylcholine transfer protein	18559	ENSMUSG00000020553
A_51_P452768	NA	Cyp4f14	cytochrome P450, family 4, subfamily f, polypeptide 14	64385	ENSMUSG00000024292
A_55_P1957249	NA	Pdgfrb	platelet derived growth factor receptor, beta polypeptide	18596	ENSMUSG00000024620
A_55_P2067116	NA	Dclre1c	DNA cross-link repair 1C, PSO2 homolog (S. cerevisiae)	227525	ENSMUSG00000026648
A_55_P1954835	NA	Ramp3	receptor (calcitonin) activity modifying protein 3	56089	ENSMUSG00000041046
A_55_P2101340	NA	Ramp3	receptor (calcitonin) activity modifying protein 3	56089	ENSMUSG00000041046
A_55_P1953723	NA	Rab13	RAB13, member RAS oncogene family	68328	ENSMUSG00000027935
A_51_P447668	NA	Ptpn12	protein tyrosine phosphatase, non-receptor type 12	19248	ENSMUSG00000028771
A_65_P19112	NA	Zfp397	zinc finger protein 397	69256	ENSMUSG00000024276
A_55_P2044463	NA	Lipt2	lipoyl(octanoyl) transferase 2 (putative)	67164	ENSMUSG00000030725
A_55_P2155002	NA	Ccdc23	coiled-coil domain containing 23	69216	ENSMUSG00000028643
A_55_P2159830	NA	Yaf2	YY1 associated factor 2	67057	ENSMUSG00000022634
A_55_P1999309	NA	Zfp668	zinc finger protein 668	244219	ENSMUSG00000049728
A_55_P2033507	NA	Ltbp4	latent transforming growth factor beta binding protein 4	108075	ENSMUSG00000040488
A_55_P1957319	NA	Krr1	KRR1, small subunit (SSU) processome component, homolog (yeast)	52705	ENSMUSG00000063334
A_55_P2166501	NA	Cd44	CD44 antigen	12505	ENSMUSG00000005087
A_55_P2015687	NA	D14Ertd668e	DNA segment, Chr 14, ERATO Doi 668, expressed	219132	ENSMUSG00000068245
A_51_P229655	NA	Acsm5	acyl-CoA synthetase medium-chain family member 5	272428	ENSMUSG00000030972
biological process	cellular process	GO:0009987
C=13317;O=375;E=331.54;R=1.13;rawP=0.0001;adjP=0.0200
A_52_P478236	NA	Wrn	Werner syndrome homolog (human)	22427	ENSMUSG00000031583
A_55_P2149269	NA	Galt	galactose-1-phosphate uridyl transferase	14430	ENSMUSG00000036073
A_51_P134627	NA	Asb13	ankyrin repeat and SOCS box-containing 13	142688	NULL
A_55_P1998354	NA	Wbp4	WW domain binding protein 4	22380	ENSMUSG00000022023
A_55_P2066399	NA	Fcho2	FCH domain only 2	218503	ENSMUSG00000041685
A_55_P1954569	NA	Hmgcs1	3-hydroxy-3-methylglutaryl-Coenzyme A synthase 1	208715	ENSMUSG00000093930
A_55_P2012552	NA	Nap1l5	nucleosome assembly protein 1-like 5	58243	ENSMUSG00000055430
A_51_P155142	NA	Cdca8	cell division cycle associated 8	52276	ENSMUSG00000028873
A_55_P2031466	NA	Lrrc32	leucine rich repeat containing 32	434215	ENSMUSG00000090958
A_55_P1955417	NA	Atad3a	ATPase family, AAA domain containing 3A	108888	ENSMUSG00000029036
A_55_P1994194	NA	Heph	hephaestin	15203	ENSMUSG00000031209
A_55_P2074366	NA	Yars	tyrosyl-tRNA synthetase	107271	ENSMUSG00000028811
A_51_P468505	NA	2810408M09Rik	RIKEN cDNA 2810408M09 gene	381406	ENSMUSG00000039725
A_55_P2324712	NA	Dmrt1	doublesex and mab-3 related transcription factor 1	50796	ENSMUSG00000024837
A_55_P2061094	NA	Fnta	farnesyltransferase, CAAX box, alpha	14272	ENSMUSG00000015994
A_52_P341339	NA	Sos1	son of sevenless homolog 1 (Drosophila)	20662	ENSMUSG00000024241
A_66_P101251	NA	Chmp3	charged multivesicular body protein 3	66700	ENSMUSG00000053119
A_51_P379710	NA	Rpn1	ribophorin I	103963	ENSMUSG00000030062
A_55_P2016346	NA	Eif3d	eukaryotic translation initiation factor 3, subunit D	55944	ENSMUSG00000016554
A_51_P460954	NA	Ccl6	chemokine (C-C motif) ligand 6	20305	ENSMUSG00000018927
A_55_P2237129	NA	St6galnac5	ST6 (alpha-N-acetyl-neuraminyl-2,3-beta-galactosyl-1,3)-N-acetylgalactosaminide alpha-2,6-sialyltransferase 5	26938	ENSMUSG00000039037
A_51_P188772	NA	Rgnef	Rho-guanine nucleotide exchange factor	110596	ENSMUSG00000021662
A_55_P2066548	NA	Baiap2l2	BAI1-associated protein 2-like 2	207495	ENSMUSG00000018126
A_51_P424532	NA	Vnn1	vanin 1	22361	ENSMUSG00000037440
A_55_P2037712	NA	Smc4	structural maintenance of chromosomes 4	70099	ENSMUSG00000034349
A_66_P123683	NA	Nabp1	nucleic acid binding protein 1	109019	ENSMUSG00000026107
A_55_P1994862	NA	Ddx60	DEAD (Asp-Glu-Ala-Asp) box polypeptide 60	234311	ENSMUSG00000037921
A_55_P1966838	NA	Xaf1	XIAP associated factor 1	327959	ENSMUSG00000040483
A_51_P506683	NA	Fbxw7	F-box and WD-40 domain protein 7	50754	ENSMUSG00000028086
A_52_P612382	NA	Cdc25b	cell division cycle 25B	12531	ENSMUSG00000027330
A_55_P2120354	NA	Cib2	calcium and integrin binding family member 2	56506	ENSMUSG00000037493
A_55_P1996911	NA	Rasa3	RAS p21 protein activator 3	19414	ENSMUSG00000031453
A_55_P2177899	NA	Dact1	dapper homolog 1, antagonist of beta-catenin (xenopus)	59036	ENSMUSG00000044548
A_55_P2123727	NA	Grb2	growth factor receptor bound protein 2	14784	ENSMUSG00000059923
A_55_P2013569	NA	Agbl4	ATP/GTP binding protein-like 4	78933	ENSMUSG00000061298
A_55_P1973848	NA	Sema4b	sema domain, immunoglobulin domain (Ig), transmembrane domain (TM) and short cytoplasmic domain, (semaphorin) 4B	20352	ENSMUSG00000030539
A_51_P180452	NA	Crk	v-crk sarcoma virus CT10 oncogene homolog (avian)	12928	ENSMUSG00000017776
A_55_P2008452	NA	Wtap	Wilms' tumour 1-associating protein	60532	ENSMUSG00000060475
A_55_P2106922	NA	Arfgap3	ADP-ribosylation factor GTPase activating protein 3	66251	ENSMUSG00000054277
A_55_P2120956	NA	Arfgap3	ADP-ribosylation factor GTPase activating protein 3	66251	ENSMUSG00000054277
A_52_P385536	NA	Ddx58	DEAD (Asp-Glu-Ala-Asp) box polypeptide 58	230073	ENSMUSG00000040296
A_51_P443293	NA	Decr2	2-4-dienoyl-Coenzyme A reductase 2, peroxisomal	26378	ENSMUSG00000036775
A_51_P121275	NA	Cenpo	centromere protein O	52504	ENSMUSG00000020652
A_51_P450169	NA	Dnajb13	DnaJ (Hsp40) related, subfamily B, member 13	69387	ENSMUSG00000030708
A_52_P745	NA	Acox3	acyl-Coenzyme A oxidase 3, pristanoyl	80911	ENSMUSG00000029098
A_51_P343913	NA	Parp4	poly (ADP-ribose) polymerase family, member 4	328417	ENSMUSG00000054509
A_51_P234544	NA	Azin1	antizyme inhibitor 1	54375	ENSMUSG00000037458
A_55_P1963508	NA	Slc13a5	solute carrier family 13 (sodium-dependent citrate transporter), member 5	237831	ENSMUSG00000020805
A_66_P102076	NA	Cep68	centrosomal protein 68	216543	ENSMUSG00000044066
A_55_P2089118	NA	9830147E19Rik	RIKEN cDNA 9830147E19 gene	208111	ENSMUSG00000074158
A_55_P2130256	NA	Polr2l	polymerase (RNA) II (DNA directed) polypeptide L	66491	ENSMUSG00000038489
A_51_P403610	NA	Olfr1339	olfactory receptor 1339	258851	ENSMUSG00000070820
A_52_P483129	NA	Utp23	UTP23, small subunit (SSU) processome component, homolog (yeast)	78581	ENSMUSG00000022313
A_51_P425824	NA	Fam132a	family with sequence similarity 132, member A	67389	ENSMUSG00000023571
A_55_P2016459	NA	Cxcl10	chemokine (C-X-C motif) ligand 10	15945	ENSMUSG00000034855
A_55_P2053241	NA	Gng4	guanine nucleotide binding protein (G protein), gamma 4	14706	ENSMUSG00000021303
A_55_P2015520	NA	Plekha1	pleckstrin homology domain containing, family A (phosphoinositide binding specific) member 1	101476	ENSMUSG00000040268
A_55_P2156855	NA	Car13	carbonic anhydrase 13	71934	ENSMUSG00000027555
A_55_P2035667	NA	Gyk	glycerol kinase	14933	ENSMUSG00000025059
A_52_P585699	NA	Ciao1	cytosolic iron-sulfur protein assembly 1	26371	ENSMUSG00000003662
A_55_P2103060	NA	Pxk	PX domain containing serine/threonine kinase	218699	ENSMUSG00000033885
A_55_P2071466	NA	Ncf1	neutrophil cytosolic factor 1	17969	ENSMUSG00000015950
A_55_P1957739	NA	Guca2b	guanylate cyclase activator 2b (retina)	14916	ENSMUSG00000032978
A_52_P179068	NA	Gucy1b3	guanylate cyclase 1, soluble, beta 3	54195	ENSMUSG00000028005
A_55_P2046793	NA	Eogt	EGF domain-specific O-linked N-acetylglucosamine (GlcNAc) transferase	101351	ENSMUSG00000035245
A_52_P270145	NA	Zfp329	zinc finger protein 329	67230	ENSMUSG00000057894
A_55_P2049252	NA	Mapkapk5	MAP kinase-activated protein kinase 5	17165	ENSMUSG00000029454
A_51_P518488	NA	Atpif1	ATPase inhibitory factor 1	11983	ENSMUSG00000054428
A_51_P483473	NA	St3gal5	ST3 beta-galactoside alpha-2,3-sialyltransferase 5	20454	ENSMUSG00000056091
A_55_P2138956	NA	Tpk1	thiamine pyrophosphokinase	29807	ENSMUSG00000029735
A_55_P1971229	NA	Slc25a36	solute carrier family 25, member 36	192287	ENSMUSG00000032449
A_51_P106952	NA	Rbm26	RNA binding motif protein 26	74213	ENSMUSG00000022119
A_51_P323148	NA	Mfsd8	major facilitator superfamily domain containing 8	72175	ENSMUSG00000025759
A_55_P2080130	NA	Aim2	absent in melanoma 2	383619	ENSMUSG00000037860
A_66_P120305	NA	Zmynd11	zinc finger, MYND domain containing 11	66505	ENSMUSG00000021156
A_66_P102891	NA	Lrrc8a	leucine rich repeat containing 8A	241296	ENSMUSG00000007476
A_55_P2054803	NA	Rxfp4	relaxin family peptide receptor 4	242093	ENSMUSG00000049741
A_55_P1995404	NA	Cd59b	CD59b antigen	333883	ENSMUSG00000068686
A_51_P170008	NA	Napg	N-ethylmaleimide sensitive fusion protein attachment protein gamma	108123	ENSMUSG00000024581
A_52_P494115	NA	Gatad2b	GATA zinc finger domain containing 2B	229542	ENSMUSG00000042390
A_55_P2053251	NA	Gabrg3	gamma-aminobutyric acid (GABA) A receptor, subunit gamma 3	14407	ENSMUSG00000055026
A_55_P1953961	NA	Cdkl3	cyclin-dependent kinase-like 3	213084	ENSMUSG00000020389
A_55_P2142439	NA	Echdc2	enoyl Coenzyme A hydratase domain containing 2	52430	ENSMUSG00000028601
A_51_P483280	NA	Prnp	prion protein	19122	ENSMUSG00000079037
A_66_P105175	NA	Bche	butyrylcholinesterase	12038	ENSMUSG00000027792
A_52_P500002	NA	Tspyl5	testis-specific protein, Y-encoded-like 5	239364	ENSMUSG00000038984
A_55_P2137828	NA	Gprc5b	G protein-coupled receptor, family C, group 5, member B	64297	ENSMUSG00000008734
A_55_P2081616	NA	Timeless	timeless homolog (Drosophila)	21853	ENSMUSG00000039994
A_55_P1982585	NA	Kdm4a	lysine (K)-specific demethylase 4A	230674	ENSMUSG00000033326
A_55_P2084332	NA	Pigp	phosphatidylinositol glycan anchor biosynthesis, class P	56176	ENSMUSG00000022940
A_55_P1962946	NA	Syk	spleen tyrosine kinase	20963	ENSMUSG00000021457
A_55_P2147220	NA	Ak2	adenylate kinase 2	11637	ENSMUSG00000028792
A_55_P2014411	NA	Vmn2r35	vomeronasal 2, receptor 35	625353	ENSMUSG00000096399
A_51_P227718	NA	Rasgrp4	RAS guanyl releasing protein 4	233046	ENSMUSG00000030589
A_51_P117226	NA	Zdhhc2	zinc finger, DHHC domain containing 2	70546	ENSMUSG00000039470
A_52_P651248	NA	Zdhhc2	zinc finger, DHHC domain containing 2	70546	ENSMUSG00000039470
A_51_P187679	NA	Nhedc1	Na+/H+ exchanger domain containing 1	74446	ENSMUSG00000050150
A_55_P2148082	NA	Larp7	La ribonucleoprotein domain family, member 7	28036	ENSMUSG00000027968
A_52_P491073	NA	Nek8	NIMA (never in mitosis gene a)-related expressed kinase 8	140859	ENSMUSG00000017405
A_51_P515462	NA	Olfr516	olfactory receptor 516	258720	ENSMUSG00000062434
A_51_P329818	NA	Dpep3	dipeptidase 3	71854	ENSMUSG00000031898
A_55_P2078048	NA	BC004004	cDNA sequence BC004004	80748	ENSMUSG00000052712
A_51_P404110	NA	Fmnl1	formin-like 1	57778	ENSMUSG00000055805
A_55_P2086825	NA	Rgl3	ral guanine nucleotide dissociation stimulator-like 3	71746	ENSMUSG00000040146
A_51_P388374	NA	Ppil4	peptidylprolyl isomerase (cyclophilin)-like 4	67418	ENSMUSG00000015757
A_55_P1991851	NA	Speg	SPEG complex locus	11790	ENSMUSG00000026207
A_55_P2054643	NA	Nrxn3	neurexin III	18191	ENSMUSG00000066392
A_55_P2105406	NA	Nrxn3	neurexin III	18191	ENSMUSG00000066392
A_55_P2060498	NA	Zfp553	zinc finger protein 553	233887	ENSMUSG00000045598
A_55_P2031636	NA	Igf1	insulin-like growth factor 1	16000	ENSMUSG00000020053
A_52_P210909	NA	Pkd2l2	polycystic kidney disease 2-like 2	53871	ENSMUSG00000014503
A_55_P1976690	NA	Snrnp35	small nuclear ribonucleoprotein 35 (U11/U12)	76167	ENSMUSG00000029402
A_65_P08971	NA	F3	coagulation factor III	14066	ENSMUSG00000028128
A_55_P1990849	NA	Dclre1b	DNA cross-link repair 1B, PSO2 homolog (S. cerevisiae)	140917	ENSMUSG00000027845
A_51_P150120	NA	Mgst2	microsomal glutathione S-transferase 2	211666	ENSMUSG00000074604
A_52_P662244	NA	Slc25a47	solute carrier family 25, member 47	104910	ENSMUSG00000048856
A_55_P2144766	NA	Pigc	phosphatidylinositol glycan anchor biosynthesis, class C	67292	ENSMUSG00000026698
A_55_P1953919	NA	Me3	malic enzyme 3, NADP(+)-dependent, mitochondrial	109264	ENSMUSG00000030621
A_51_P161265	NA	Ccl25	chemokine (C-C motif) ligand 25	20300	ENSMUSG00000023235
A_52_P537852	NA	Fam120b	family with sequence similarity 120B	67544	ENSMUSG00000014763
A_55_P2130610	NA	Smc3	structural maintenance of chromosomes 3	13006	ENSMUSG00000024974
A_55_P2051914	NA	Zfp568	zinc finger protein 568	243905	ENSMUSG00000074221
A_51_P172502	NA	Cxcl12	chemokine (C-X-C motif) ligand 12	20315	ENSMUSG00000061353
A_55_P2119463	NA	Ggh	gamma-glutamyl hydrolase	14590	ENSMUSG00000073987
A_66_P134090	NA	Grpel2	GrpE-like 2, mitochondrial	17714	ENSMUSG00000024580
A_55_P1987730	NA	5730469M10Rik	RIKEN cDNA 5730469M10 gene	70564	ENSMUSG00000021792
A_55_P1974783	NA	Tsnax	translin-associated factor X	53424	ENSMUSG00000056820
A_55_P1981050	NA	Gemin8	gem (nuclear organelle) associated protein 8	237221	ENSMUSG00000040621
A_66_P123787	NA	Lars2	leucyl-tRNA synthetase, mitochondrial	102436	ENSMUSG00000035202
A_55_P2074631	NA	Cpeb1	cytoplasmic polyadenylation element binding protein 1	12877	ENSMUSG00000025586
A_51_P476601	NA	Ly96	lymphocyte antigen 96	17087	ENSMUSG00000025779
A_55_P2075127	NA	Pax2	paired box gene 2	18504	ENSMUSG00000004231
A_55_P2049388	NA	Zfp28	zinc finger protein 28	22690	ENSMUSG00000062861
A_52_P427240	NA	Ltn1	listerin E3 ubiquitin protein ligase 1	78913	ENSMUSG00000052299
A_51_P466221	NA	Amhr2	anti-Mullerian hormone type 2 receptor	110542	ENSMUSG00000023047
A_52_P433828	NA	Tctn3	tectonic family member 3	67590	ENSMUSG00000025008
A_55_P2156638	NA	Gpr114	G protein-coupled receptor 114	382045	ENSMUSG00000061577
A_52_P156190	NA	Ednra	endothelin receptor type A	13617	ENSMUSG00000031616
A_55_P1978201	NA	Incenp	inner centromere protein	16319	ENSMUSG00000024660
A_55_P2185950	NA	Bpnt1	bisphosphate 3'-nucleotidase 1	23827	ENSMUSG00000026617
A_55_P2051778	NA	Sult2b1	sulfotransferase family, cytosolic, 2B, member 1	54200	ENSMUSG00000003271
A_55_P2120433	NA	Wdr12	WD repeat domain 12	57750	ENSMUSG00000026019
A_52_P278327	NA	Vtcn1	V-set domain containing T cell activation inhibitor 1	242122	ENSMUSG00000051076
A_51_P435321	NA	Ap1s2	adaptor-related protein complex 1, sigma 2 subunit	108012	ENSMUSG00000031367
A_55_P2003483	NA	Gldc	glycine decarboxylase	104174	ENSMUSG00000024827
A_51_P336599	NA	Kcne3	potassium voltage-gated channel, Isk-related subfamily, gene 3	57442	ENSMUSG00000035165
A_51_P345316	NA	Cep76	centrosomal protein 76	225659	ENSMUSG00000073542
A_51_P340402	NA	Eefsec	eukaryotic elongation factor, selenocysteine-tRNA-specific	65967	ENSMUSG00000033216
A_55_P2379599	NA	Asph	aspartate-beta-hydroxylase	65973	ENSMUSG00000028207
A_55_P2076288	NA	Zfp661	zinc finger protein 661	72180	ENSMUSG00000034800
A_55_P2124425	NA	Zfp661	zinc finger protein 661	72180	ENSMUSG00000034800
A_55_P2034260	NA	Ctdsp1	CTD (carboxy-terminal domain, RNA polymerase II, polypeptide A) small phosphatase 1	227292	ENSMUSG00000026176
A_52_P330395	NA	Farp1	FERM, RhoGEF (Arhgef) and pleckstrin domain protein 1 (chondrocyte-derived)	223254	ENSMUSG00000025555
A_55_P2158483	NA	Nkiras2	NFKB inhibitor interacting Ras-like protein 2	71966	ENSMUSG00000017837
A_51_P491051	NA	Ints9	integrator complex subunit 9	210925	ENSMUSG00000021975
A_52_P359502	NA	Pdxk	pyridoxal (pyridoxine, vitamin B6) kinase	216134	ENSMUSG00000032788
A_55_P1998631	NA	Capg	capping protein (actin filament), gelsolin-like	12332	ENSMUSG00000056737
A_52_P509710	NA	Zwint	ZW10 interactor	52696	ENSMUSG00000019923
A_55_P1989544	NA	Cklf	chemokine-like factor	75458	ENSMUSG00000054400
A_52_P459929	NA	Itga1	integrin alpha 1	109700	ENSMUSG00000042284
A_55_P2115477	NA	Parva	parvin, alpha	57342	ENSMUSG00000030770
A_51_P201480	NA	Stat3	signal transducer and activator of transcription 3	20848	ENSMUSG00000004040
A_51_P511899	NA	Mthfsd	methenyltetrahydrofolate synthetase domain containing	234814	ENSMUSG00000031816
A_55_P1965655	NA	Mtmr14	myotubularin related protein 14	97287	ENSMUSG00000030269
A_51_P104933	NA	Trub2	TruB pseudouridine (psi) synthase homolog 2 (E. coli)	227682	ENSMUSG00000039826
A_55_P1986351	NA	D630037F22Rik	RIKEN cDNA D630037F22 gene	544696	ENSMUSG00000038122
A_51_P452768	NA	Cyp4f14	cytochrome P450, family 4, subfamily f, polypeptide 14	64385	ENSMUSG00000024292
A_55_P2002918	NA	Klc2	kinesin light chain 2	16594	ENSMUSG00000024862
A_55_P2067116	NA	Dclre1c	DNA cross-link repair 1C, PSO2 homolog (S. cerevisiae)	227525	ENSMUSG00000026648
A_55_P1953723	NA	Rab13	RAB13, member RAS oncogene family	68328	ENSMUSG00000027935
A_51_P128320	NA	Muc2	mucin 2	17831	ENSMUSG00000025515
A_55_P1993864	NA	Sh2b3	SH2B adaptor protein 3	16923	ENSMUSG00000042594
A_51_P447668	NA	Ptpn12	protein tyrosine phosphatase, non-receptor type 12	19248	ENSMUSG00000028771
A_65_P19112	NA	Zfp397	zinc finger protein 397	69256	ENSMUSG00000024276
A_55_P2044463	NA	Lipt2	lipoyl(octanoyl) transferase 2 (putative)	67164	ENSMUSG00000030725
A_55_P1953311	NA	Stx2	syntaxin 2	13852	ENSMUSG00000029428
A_55_P2023902	NA	Gabra4	gamma-aminobutyric acid (GABA) A receptor, subunit alpha 4	14397	ENSMUSG00000029211
A_55_P2159830	NA	Yaf2	YY1 associated factor 2	67057	ENSMUSG00000022634
A_55_P1972172	NA	Cacng2	calcium channel, voltage-dependent, gamma subunit 2	12300	ENSMUSG00000019146
A_55_P2118799	NA	Rmi1	RMI1, RecQ mediated genome instability 1, homolog (S. cerevisiae)	74386	ENSMUSG00000035367
A_51_P178828	NA	Mbl2	mannose-binding lectin (protein C) 2	17195	ENSMUSG00000024863
A_55_P1971963	NA	Tmem176b	transmembrane protein 176B	65963	ENSMUSG00000029810
A_55_P1961140	NA	Mettl3	methyltransferase like 3	56335	ENSMUSG00000022160
A_55_P2097729	NA	Gtpbp4	GTP binding protein 4	69237	ENSMUSG00000021149
A_51_P505662	NA	4933437F05Rik	RIKEN cDNA 4933437F05 gene	71275	ENSMUSG00000072919
A_66_P106836	NA	Kmo	kynurenine 3-monooxygenase (kynurenine 3-hydroxylase)	98256	ENSMUSG00000039783
A_55_P2184264	NA	Timm23	translocase of inner mitochondrial membrane 23 homolog (yeast)	53600	ENSMUSG00000013701
A_51_P386870	NA	Sprr2f	small proline-rich protein 2F	20760	ENSMUSG00000050635
A_55_P2045792	NA	Pes1	pescadillo homolog 1, containing BRCT domain (zebrafish)	64934	ENSMUSG00000020430
A_55_P1959648	NA	Hspg2	perlecan (heparan sulfate proteoglycan 2)	15530	ENSMUSG00000028763
A_66_P121976	NA	Slc4a11	solute carrier family 4, sodium bicarbonate transporter-like, member 11	269356	ENSMUSG00000074796
A_51_P289742	NA	Slc27a5	solute carrier family 27 (fatty acid transporter), member 5	26459	ENSMUSG00000030382
A_51_P232858	NA	Rpl14	ribosomal protein L14	67115	ENSMUSG00000025794
A_51_P235440	NA	Pelp1	proline, glutamic acid and leucine rich protein 1	75273	ENSMUSG00000018921
A_51_P379083	NA	Adam24	a disintegrin and metallopeptidase domain 24 (testase 1)	13526	ENSMUSG00000046723
A_55_P1966878	NA	Rnaseh2a	ribonuclease H2, large subunit	69724	ENSMUSG00000052926
A_55_P1994042	NA	Zbp1	Z-DNA binding protein 1	58203	ENSMUSG00000027514
A_66_P139683	NA	Zbp1	Z-DNA binding protein 1	58203	ENSMUSG00000027514
A_51_P400463	NA	Agmat	agmatine ureohydrolase (agmatinase)	75986	ENSMUSG00000040706
A_55_P2120615	NA	Ssh3	slingshot homolog 3 (Drosophila)	245857	ENSMUSG00000034616
A_51_P441469	NA	Jmy	junction-mediating and regulatory protein	57748	ENSMUSG00000021690
A_52_P24439	NA	Sftpa1	surfactant associated protein A1	20387	ENSMUSG00000021789
A_52_P189957	NA	Dbnl	drebrin-like	13169	ENSMUSG00000020476
A_55_P1970299	NA	Mttp	microsomal triglyceride transfer protein	17777	ENSMUSG00000028158
A_52_P647291	NA	Cecr2	cat eye syndrome chromosome region, candidate 2	330409	ENSMUSG00000071226
A_52_P211418	NA	G2e3	G2/M-phase specific E3 ubiquitin ligase	217558	ENSMUSG00000035293
A_55_P2107957	NA	Fam175a	family with sequence similarity 175, member A	70681	ENSMUSG00000035234
A_51_P302167	NA	Cobl	cordon-bleu	12808	ENSMUSG00000020173
A_52_P439263	NA	Ugt8a	UDP galactosyltransferase 8A	22239	ENSMUSG00000032854
A_55_P2129354	NA	Pilra	paired immunoglobin-like type 2 receptor alpha	231805	ENSMUSG00000046245
A_51_P422625	NA	Arl11	ADP-ribosylation factor-like 11	219144	ENSMUSG00000043157
A_51_P362738	NA	Dusp18	dual specificity phosphatase 18	75219	ENSMUSG00000047205
A_52_P266530	NA	Ide	insulin degrading enzyme	15925	ENSMUSG00000056999
A_55_P2072522	NA	Pcdhb16	protocadherin beta 16	93887	ENSMUSG00000047910
A_55_P1992319	NA	Col4a3bp	collagen, type IV, alpha 3 (Goodpasture antigen) binding protein	68018	ENSMUSG00000021669
A_55_P2001458	NA	Zscan29	zinc finger SCAN domains 29	99334	ENSMUSG00000050619
A_52_P249920	NA	Zscan29	zinc finger SCAN domains 29	99334	ENSMUSG00000050619
A_55_P2033020	NA	Clcn1	chloride channel 1	12723	ENSMUSG00000029862
A_51_P334789	NA	Nudt16	nudix (nucleoside diphosphate linked moiety X)-type motif 16	75686	ENSMUSG00000032565
A_51_P350048	NA	Gstt2	glutathione S-transferase, theta 2	14872	ENSMUSG00000033318
A_51_P381006	NA	Olfr557	olfactory receptor 557	258358	ENSMUSG00000073967
A_51_P394115	NA	Aadac	arylacetamide deacetylase (esterase)	67758	ENSMUSG00000027761
A_52_P556082	NA	Trmt2b	TRM2 tRNA methyltransferase 2 homolog B (S. cerevisiae)	215201	ENSMUSG00000067369
A_51_P108659	NA	Pon1	paraoxonase 1	18979	ENSMUSG00000002588
A_52_P467046	NA	Wdr48	WD repeat domain 48	67561	ENSMUSG00000032512
A_55_P1963031	NA	Ampd2	adenosine monophosphate deaminase 2	109674	ENSMUSG00000027889
A_51_P412809	NA	Dqx1	DEAQ RNA-dependent ATPase	93838	ENSMUSG00000009145
A_51_P448814	NA	Zfp90	zinc finger protein 90	22751	ENSMUSG00000031907
A_55_P1995623	NA	Pomp	proteasome maturation protein	66537	ENSMUSG00000029649
A_55_P1984023	NA	Arrb2	arrestin, beta 2	216869	ENSMUSG00000060216
A_52_P75348	NA	Ccdc99	coiled-coil domain containing 99	70385	ENSMUSG00000069910
A_55_P1972054	NA	Capn10	calpain 10	23830	ENSMUSG00000026270
A_51_P510764	NA	Agmo	alkylglycerol monooxygenase	319660	ENSMUSG00000050103
A_55_P1953533	NA	Spon1	spondin 1, (f-spondin) extracellular matrix protein	233744	ENSMUSG00000038156
A_55_P1992329	NA	Gmpr	guanosine monophosphate reductase	66355	ENSMUSG00000000253
A_55_P2122180	NA	Snta1	syntrophin, acidic 1	20648	ENSMUSG00000027488
A_51_P440327	NA	Efhc1	EF-hand domain (C-terminal) containing 1	71877	ENSMUSG00000041809
A_55_P2141943	NA	Ube2l6	ubiquitin-conjugating enzyme E2L 6	56791	ENSMUSG00000027078
A_55_P2137431	NA	Rtel1	regulator of telomere elongation helicase 1	269400	ENSMUSG00000038685
A_55_P2065726	NA	Snx29	sorting nexin 29	74478	NULL
A_55_P2114596	NA	Zfp161	zinc finger protein 161	22666	ENSMUSG00000049672
A_55_P2093163	NA	Zfp161	zinc finger protein 161	22666	ENSMUSG00000049672
A_51_P314161	NA	Qtrt1	queuine tRNA-ribosyltransferase 1	60507	ENSMUSG00000002825
A_55_P2055257	NA	Maoa	monoamine oxidase A	17161	ENSMUSG00000025037
A_51_P461429	NA	Cyp7b1	cytochrome P450, family 7, subfamily b, polypeptide 1	13123	ENSMUSG00000039519
A_55_P2433218	NA	Bloc1s6	biogenesis of organelles complex-1, subunit 6, pallidin	18457	ENSMUSG00000005804
A_52_P191086	NA	Kcnj6	potassium inwardly-rectifying channel, subfamily J, member 6	16522	ENSMUSG00000043301
A_55_P1975140	NA	Acvr1c	activin A receptor, type IC	269275	ENSMUSG00000026834
A_55_P2064203	NA	Acvr1c	activin A receptor, type IC	269275	ENSMUSG00000026834
A_51_P476261	NA	Zfp120	zinc finger protein 120	104348	ENSMUSG00000068134
A_55_P2017789	NA	Il4ra	interleukin 4 receptor, alpha	16190	ENSMUSG00000030748
A_52_P559919	NA	Eif2ak2	eukaryotic translation initiation factor 2-alpha kinase 2	19106	ENSMUSG00000024079
A_55_P2002727	NA	Inpp4a	inositol polyphosphate-4-phosphatase, type I	269180	ENSMUSG00000026113
A_55_P2060107	NA	Pkm	pyruvate kinase, muscle	18746	ENSMUSG00000032294
A_55_P2134496	NA	Amfr	autocrine motility factor receptor	23802	ENSMUSG00000031751
A_55_P2039981	NA	Grik2	glutamate receptor, ionotropic, kainate 2 (beta 2)	14806	ENSMUSG00000056073
A_55_P2146314	NA	Lmx1a	LIM homeobox transcription factor 1 alpha	110648	ENSMUSG00000026686
A_55_P2216456	NA	Rint1	RAD50 interactor 1	72772	ENSMUSG00000028999
A_52_P330540	NA	Mis18a	MIS18 kinetochore protein homolog A (S. pombe)	66578	ENSMUSG00000022978
A_55_P2020602	NA	Pacsin1	protein kinase C and casein kinase substrate in neurons 1	23969	ENSMUSG00000040276
A_51_P414396	NA	Mmrn2	multimerin 2	105450	ENSMUSG00000041445
A_51_P285779	NA	Asphd2	aspartate beta-hydroxylase domain containing 2	72898	ENSMUSG00000029348
A_52_P56751	NA	Lcp1	lymphocyte cytosolic protein 1	18826	ENSMUSG00000021998
A_52_P52618	NA	Csf2rb	colony stimulating factor 2 receptor, beta, low-affinity (granulocyte-macrophage)	12983	ENSMUSG00000071713
A_52_P667287	NA	Lass6	LAG1 homolog, ceramide synthase 6	241447	ENSMUSG00000027035
A_55_P1965876	NA	Opn1mw	opsin 1 (cone pigments), medium-wave-sensitive (color blindness, deutan)	14539	ENSMUSG00000031394
A_55_P1959238	NA	Nagk	N-acetylglucosamine kinase	56174	ENSMUSG00000034744
A_55_P2122605	NA	Cbr2	carbonyl reductase 2	12409	ENSMUSG00000025150
A_55_P2122604	NA	Cbr2	carbonyl reductase 2	12409	ENSMUSG00000025150
A_52_P356204	NA	Nostrin	nitric oxide synthase trafficker	329416	ENSMUSG00000034738
A_55_P2152962	NA	Mtr	5-methyltetrahydrofolate-homocysteine methyltransferase	238505	ENSMUSG00000021311
A_55_P2043267	NA	Cdc42se1	CDC42 small effector 1	57912	ENSMUSG00000046722
A_51_P451075	NA	Atp2a2	ATPase, Ca++ transporting, cardiac muscle, slow twitch 2	11938	ENSMUSG00000029467
A_51_P210474	NA	Mrpl18	mitochondrial ribosomal protein L18	67681	ENSMUSG00000057388
A_55_P2162807	NA	Pla2g2e	phospholipase A2, group IIE	26970	ENSMUSG00000028751
A_66_P113008	NA	Pla2g2e	phospholipase A2, group IIE	26970	ENSMUSG00000028751
A_66_P111090	NA	Sctr	secretin receptor	319229	ENSMUSG00000026387
A_52_P367520	NA	Nexn	nexilin	68810	ENSMUSG00000039103
A_55_P2174967	NA	Elac2	elaC homolog 2 (E. coli)	68626	ENSMUSG00000020549
A_55_P2097178	NA	Idua	iduronidase, alpha-L-	15932	ENSMUSG00000033540
A_55_P2017312	NA	Eapp	E2F-associated phosphoprotein	66266	ENSMUSG00000054302
A_51_P320980	NA	Sfxn4	sideroflexin 4	94281	ENSMUSG00000063698
A_51_P421538	NA	Nhedc2	Na+/H+ exchanger domain containing 2	97086	ENSMUSG00000037994
A_52_P649285	NA	Cdc26	cell division cycle 26	66440	ENSMUSG00000066149
A_51_P408584	NA	Enpp1	ectonucleotide pyrophosphatase/phosphodiesterase 1	18605	ENSMUSG00000037370
A_52_P223521	NA	Brwd1	bromodomain and WD repeat domain containing 1	93871	ENSMUSG00000022914
A_51_P506045	NA	Pgcp	plasma glutamate carboxypeptidase	54381	ENSMUSG00000039007
A_55_P2041529	NA	Eya4	eyes absent 4 homolog (Drosophila)	14051	ENSMUSG00000010461
A_55_P2008790	NA	Zfp30	zinc finger protein 30	22693	ENSMUSG00000047473
A_55_P2151556	NA	C8g	complement component 8, gamma polypeptide	69379	ENSMUSG00000015083
A_55_P1988058	NA	Tyw3	tRNA-yW synthesizing protein 3 homolog (S. cerevisiae)	209584	ENSMUSG00000047583
A_55_P1979620	NA	Eif3h	eukaryotic translation initiation factor 3, subunit H	68135	ENSMUSG00000022312
A_51_P339822	NA	Arhgap4	Rho GTPase activating protein 4	171207	ENSMUSG00000031389
A_55_P2143119	NA	Ddx39b	DEAD (Asp-Glu-Ala-Asp) box polypeptide 39B	53817	ENSMUSG00000019432
A_55_P2130501	NA	Fndc1	fibronectin type III domain containing 1	68655	ENSMUSG00000071984
A_51_P323180	NA	Gbp9	guanylate-binding protein 9	236573	ENSMUSG00000029298
A_55_P2070492	NA	Vmn2r59	vomeronasal 2, receptor 59	628444	ENSMUSG00000092032
A_51_P129149	NA	Gatad2a	GATA zinc finger domain containing 2A	234366	ENSMUSG00000036180
A_55_P2069554	NA	Brix1	BRX1, biogenesis of ribosomes, homolog (S. cerevisiae)	67832	ENSMUSG00000022247
A_55_P2020050	NA	Itga6	integrin alpha 6	16403	ENSMUSG00000027111
A_55_P2096917	NA	Mreg	melanoregulin	381269	ENSMUSG00000039395
A_55_P2007646	NA	Cryaa	crystallin, alpha A	12954	ENSMUSG00000024041
A_51_P474454	NA	Rnaseh2b	ribonuclease H2, subunit B	67153	ENSMUSG00000021932
A_52_P76402	NA	Eif2c1	eukaryotic translation initiation factor 2C, 1	236511	ENSMUSG00000041530
A_55_P1997424	NA	Cwc22	CWC22 spliceosome-associated protein homolog (S. cerevisiae)	80744	ENSMUSG00000027014
A_52_P20357	NA	Aqr	aquarius	11834	ENSMUSG00000040383
A_51_P328968	NA	Zfp322a	zinc finger protein 322A	218100	ENSMUSG00000046351
A_51_P223575	NA	Tbc1d23	TBC1 domain family, member 23	67581	ENSMUSG00000022749
A_66_P100093	NA	Ccdc47	coiled-coil domain containing 47	67163	ENSMUSG00000078622
A_51_P428742	NA	Pus7l	pseudouridylate synthase 7 homolog (S. cerevisiae)-like	78895	ENSMUSG00000033356
A_55_P2017699	NA	Lpar5	lysophosphatidic acid receptor 5	381810	ENSMUSG00000067714
A_51_P189943	NA	Dscam	Down syndrome cell adhesion molecule	13508	ENSMUSG00000050272
A_51_P284823	NA	Polr1b	polymerase (RNA) I polypeptide B	20017	ENSMUSG00000027395
A_55_P1969058	NA	Epha7	Eph receptor A7	13841	ENSMUSG00000028289
A_55_P2075200	NA	Tor3a	torsin family 3, member A	30935	ENSMUSG00000060519
A_51_P316902	NA	Svopl	SV2 related protein homolog (rat)-like	320590	ENSMUSG00000029830
A_51_P411264	NA	Txndc16	thioredoxin domain containing 16	70561	ENSMUSG00000021830
A_51_P438952	NA	Bag4	BCL2-associated athanogene 4	67384	ENSMUSG00000037316
A_55_P2073647	NA	Elp2	elongator acetyltransferase complex subunit 2	58523	ENSMUSG00000024271
A_55_P2066230	NA	Hck	hemopoietic cell kinase	15162	ENSMUSG00000003283
A_52_P677956	NA	Pex11c	peroxisomal biogenesis factor 11 gamma	69129	NULL
A_51_P166339	NA	Avil	advillin	11567	ENSMUSG00000025432
A_55_P2171413	NA	Me1	malic enzyme 1, NADP(+)-dependent, cytosolic	17436	ENSMUSG00000032418
A_55_P2009952	NA	Me1	malic enzyme 1, NADP(+)-dependent, cytosolic	17436	ENSMUSG00000032418
A_55_P2186332	NA	Chrna9	cholinergic receptor, nicotinic, alpha polypeptide 9	231252	ENSMUSG00000029205
A_51_P301964	NA	Arl6ip1	ADP-ribosylation factor-like 6 interacting protein 1	54208	ENSMUSG00000030654
A_55_P2059337	NA	Fastk	Fas-activated serine/threonine kinase	66587	ENSMUSG00000028959
A_51_P327188	NA	Senp1	SUMO1/sentrin specific peptidase 1	223870	ENSMUSG00000033075
A_52_P575771	NA	Mtfr1	mitochondrial fission regulator 1	67472	ENSMUSG00000027601
A_52_P177373	NA	Intu	inturned planar cell polarity effector homolog (Drosophila)	380614	ENSMUSG00000060798
A_52_P529195	NA	Pcdhb4	protocadherin beta 4	93875	ENSMUSG00000045689
A_55_P1977473	NA	Dab2	disabled 2, mitogen-responsive phosphoprotein	13132	ENSMUSG00000022150
A_52_P470466	NA	D3Bwg0562e	DNA segment, Chr 3, Brigham & Women's Genetics 0562 expressed	229791	ENSMUSG00000044667
A_52_P460704	NA	A830018L16Rik	RIKEN cDNA A830018L16 gene	320492	ENSMUSG00000057715
A_55_P2104327	NA	Pxdn	peroxidasin homolog (Drosophila)	69675	ENSMUSG00000020674
A_55_P2069331	NA	3200002M19Rik	RIKEN cDNA 3200002M19 gene	75430	ENSMUSG00000030649
A_52_P399140	NA	Tmem138	transmembrane protein 138	72982	ENSMUSG00000024666
A_55_P2122200	NA	Prkar2b	protein kinase, cAMP dependent regulatory, type II beta	19088	ENSMUSG00000002997
A_51_P436483	NA	Kin	antigenic determinant of rec-A protein	16588	ENSMUSG00000037262
A_52_P48546	NA	Rnf41	ring finger protein 41	67588	ENSMUSG00000025373
A_52_P508974	NA	Igf2bp3	insulin-like growth factor 2 mRNA binding protein 3	140488	ENSMUSG00000029814
A_51_P122141	NA	Mamstr	MEF2 activating motif and SAP domain containing transcriptional regulator	74490	ENSMUSG00000042918
A_55_P2170605	NA	9430031J16Rik	RIKEN cDNA 9430031J16 gene	241134	ENSMUSG00000054976
A_51_P156158	NA	Phlpp1	PH domain and leucine rich repeat protein phosphatase 1	98432	ENSMUSG00000044340
A_51_P396385	NA	Mars2	methionine-tRNA synthetase 2 (mitochondrial)	212679	ENSMUSG00000046994
A_55_P2156731	NA	H2-Eb1	histocompatibility 2, class II antigen E beta	14969	ENSMUSG00000060586
A_66_P139159	NA	Hras1	Harvey rat sarcoma virus oncogene 1	15461	ENSMUSG00000025499
A_55_P2013858	NA	Acad8	acyl-Coenzyme A dehydrogenase family, member 8	66948	ENSMUSG00000031969
A_55_P2155479	NA	Eps8	epidermal growth factor receptor pathway substrate 8	13860	ENSMUSG00000015766
A_55_P2097393	NA	Txndc8	thioredoxin domain containing 8	67402	ENSMUSG00000038709
A_55_P1996299	NA	Pofut1	protein O-fucosyltransferase 1	140484	ENSMUSG00000046020
A_51_P235687	NA	Alox5ap	arachidonate 5-lipoxygenase activating protein	11690	ENSMUSG00000060063
A_51_P484842	NA	Asgr2	asialoglycoprotein receptor 2	11890	ENSMUSG00000040963
A_51_P155174	NA	Zfp672	zinc finger protein 672	319475	ENSMUSG00000049755
A_51_P132013	NA	Cysltr2	cysteinyl leukotriene receptor 2	70086	ENSMUSG00000033470
A_52_P86073	NA	Mrpl1	mitochondrial ribosomal protein L1	94061	ENSMUSG00000029486
A_55_P2165239	NA	Abl1	c-abl oncogene 1, non-receptor tyrosine kinase	11350	ENSMUSG00000026842
A_55_P2112120	NA	Tnk2	tyrosine kinase, non-receptor, 2	51789	ENSMUSG00000022791
A_55_P2151689	NA	Traf6	TNF receptor-associated factor 6	22034	ENSMUSG00000027164
A_55_P2111197	NA	Arhgap24	Rho GTPase activating protein 24	231532	ENSMUSG00000057315
A_52_P235278	NA	Pms1	postmeiotic segregation increased 1 (S. cerevisiae)	227099	ENSMUSG00000026098
A_51_P115738	NA	Slc5a5	solute carrier family 5 (sodium iodide symporter), member 5	114479	ENSMUSG00000000792
A_66_P105307	NA	Adnp	activity-dependent neuroprotective protein	11538	ENSMUSG00000051149
A_65_P18981	NA	Palb2	partner and localizer of BRCA2	233826	ENSMUSG00000044702
A_55_P2051313	NA	Gstk1	glutathione S-transferase kappa 1	76263	ENSMUSG00000029864
A_55_P2070494	NA	Vmn2r60	vomeronasal 2, receptor 60	637898	ENSMUSG00000090619
A_55_P2100715	NA	Auh	AU RNA binding protein/enoyl-coenzyme A hydratase	11992	ENSMUSG00000021460
A_55_P2069885	NA	Slc50a1	solute carrier family 50 (sugar transporter), member 1	19729	ENSMUSG00000027953
A_51_P518893	NA	Ccin	calicin	442829	ENSMUSG00000070999
A_55_P1957249	NA	Pdgfrb	platelet derived growth factor receptor, beta polypeptide	18596	ENSMUSG00000024620
A_55_P1954835	NA	Ramp3	receptor (calcitonin) activity modifying protein 3	56089	ENSMUSG00000041046
A_55_P2101340	NA	Ramp3	receptor (calcitonin) activity modifying protein 3	56089	ENSMUSG00000041046
A_51_P481159	NA	Cbr3	carbonyl reductase 3	109857	ENSMUSG00000022947
A_55_P1971724	NA	Cr2	complement receptor 2	12902	ENSMUSG00000026616
A_51_P206965	NA	Sypl2	synaptophysin-like 2	17306	ENSMUSG00000027887
A_55_P2155002	NA	Ccdc23	coiled-coil domain containing 23	69216	ENSMUSG00000028643
A_55_P2174501	NA	Stx17	syntaxin 17	67727	ENSMUSG00000061455
A_55_P1999309	NA	Zfp668	zinc finger protein 668	244219	ENSMUSG00000049728
A_55_P2087322	NA	Rapsn	receptor-associated protein of the synapse	19400	ENSMUSG00000002104
A_55_P2033507	NA	Ltbp4	latent transforming growth factor beta binding protein 4	108075	ENSMUSG00000040488
A_55_P1957319	NA	Krr1	KRR1, small subunit (SSU) processome component, homolog (yeast)	52705	ENSMUSG00000063334
A_52_P203691	NA	Arl5c	ADP-ribosylation factor-like 5C	217151	ENSMUSG00000038352
A_55_P2166501	NA	Cd44	CD44 antigen	12505	ENSMUSG00000005087
A_55_P2015687	NA	D14Ertd668e	DNA segment, Chr 14, ERATO Doi 668, expressed	219132	ENSMUSG00000068245
A_55_P2006436	NA	Olfr282	olfactory receptor 282	258449	ENSMUSG00000063780
A_55_P2104835	NA	P2rx4	purinergic receptor P2X, ligand-gated ion channel 4	18438	ENSMUSG00000029470
A_51_P229655	NA	Acsm5	acyl-CoA synthetase medium-chain family member 5	272428	ENSMUSG00000030972
biological process	oxoacid metabolic process	GO:0043436
C=718;O=35;E=17.88;R=1.96;rawP=0.0001;adjP=0.0200
A_51_P396385	NA	Mars2	methionine-tRNA synthetase 2 (mitochondrial)	212679	ENSMUSG00000046994
A_51_P443293	NA	Decr2	2-4-dienoyl-Coenzyme A reductase 2, peroxisomal	26378	ENSMUSG00000036775
A_52_P745	NA	Acox3	acyl-Coenzyme A oxidase 3, pristanoyl	80911	ENSMUSG00000029098
A_55_P2013858	NA	Acad8	acyl-Coenzyme A dehydrogenase family, member 8	66948	ENSMUSG00000031969
A_51_P505662	NA	4933437F05Rik	RIKEN cDNA 4933437F05 gene	71275	ENSMUSG00000072919
A_66_P106836	NA	Kmo	kynurenine 3-monooxygenase (kynurenine 3-hydroxylase)	98256	ENSMUSG00000039783
A_51_P235687	NA	Alox5ap	arachidonate 5-lipoxygenase activating protein	11690	ENSMUSG00000060063
A_51_P461429	NA	Cyp7b1	cytochrome P450, family 7, subfamily b, polypeptide 1	13123	ENSMUSG00000039519
A_51_P289742	NA	Slc27a5	solute carrier family 27 (fatty acid transporter), member 5	26459	ENSMUSG00000030382
A_52_P191086	NA	Kcnj6	potassium inwardly-rectifying channel, subfamily J, member 6	16522	ENSMUSG00000043301
A_55_P2074366	NA	Yars	tyrosyl-tRNA synthetase	107271	ENSMUSG00000028811
A_55_P2003483	NA	Gldc	glycine decarboxylase	104174	ENSMUSG00000024827
A_55_P2031636	NA	Igf1	insulin-like growth factor 1	16000	ENSMUSG00000020053
A_55_P2002727	NA	Inpp4a	inositol polyphosphate-4-phosphatase, type I	269180	ENSMUSG00000026113
A_55_P2060107	NA	Pkm	pyruvate kinase, muscle	18746	ENSMUSG00000032294
A_55_P2051313	NA	Gstk1	glutathione S-transferase kappa 1	76263	ENSMUSG00000029864
A_51_P150120	NA	Mgst2	microsomal glutathione S-transferase 2	211666	ENSMUSG00000074604
A_55_P2100715	NA	Auh	AU RNA binding protein/enoyl-coenzyme A hydratase	11992	ENSMUSG00000021460
A_51_P511899	NA	Mthfsd	methenyltetrahydrofolate synthetase domain containing	234814	ENSMUSG00000031816
A_55_P1953919	NA	Me3	malic enzyme 3, NADP(+)-dependent, mitochondrial	109264	ENSMUSG00000030621
A_51_P424532	NA	Vnn1	vanin 1	22361	ENSMUSG00000037440
A_55_P2119463	NA	Ggh	gamma-glutamyl hydrolase	14590	ENSMUSG00000073987
A_51_P452768	NA	Cyp4f14	cytochrome P450, family 4, subfamily f, polypeptide 14	64385	ENSMUSG00000024292
A_55_P2152962	NA	Mtr	5-methyltetrahydrofolate-homocysteine methyltransferase	238505	ENSMUSG00000021311
A_55_P2171413	NA	Me1	malic enzyme 1, NADP(+)-dependent, cytosolic	17436	ENSMUSG00000032418
A_55_P2009952	NA	Me1	malic enzyme 1, NADP(+)-dependent, cytosolic	17436	ENSMUSG00000032418
A_51_P350048	NA	Gstt2	glutathione S-transferase, theta 2	14872	ENSMUSG00000033318
A_55_P2044463	NA	Lipt2	lipoyl(octanoyl) transferase 2 (putative)	67164	ENSMUSG00000030725
A_51_P108659	NA	Pon1	paraoxonase 1	18979	ENSMUSG00000002588
A_55_P2142439	NA	Echdc2	enoyl Coenzyme A hydratase domain containing 2	52430	ENSMUSG00000028601
A_66_P123787	NA	Lars2	leucyl-tRNA synthetase, mitochondrial	102436	ENSMUSG00000035202
A_51_P229655	NA	Acsm5	acyl-CoA synthetase medium-chain family member 5	272428	ENSMUSG00000030972
A_55_P2122200	NA	Prkar2b	protein kinase, cAMP dependent regulatory, type II beta	19088	ENSMUSG00000002997
A_51_P510764	NA	Agmo	alkylglycerol monooxygenase	319660	ENSMUSG00000050103
A_51_P408584	NA	Enpp1	ectonucleotide pyrophosphatase/phosphodiesterase 1	18605	ENSMUSG00000037370
A_51_P506045	NA	Pgcp	plasma glutamate carboxypeptidase	54381	ENSMUSG00000039007
biological process	regulation of ERK1 and ERK2 cascade	GO:0070372
C=119;O=11;E=2.96;R=3.71;rawP=0.0002;adjP=0.0327
A_51_P132013	NA	Cysltr2	cysteinyl leukotriene receptor 2	70086	ENSMUSG00000033470
A_66_P139159	NA	Hras1	Harvey rat sarcoma virus oncogene 1	15461	ENSMUSG00000025499
A_55_P1969058	NA	Epha7	Eph receptor A7	13841	ENSMUSG00000028289
A_55_P2031636	NA	Igf1	insulin-like growth factor 1	16000	ENSMUSG00000020053
A_55_P1977473	NA	Dab2	disabled 2, mitogen-responsive phosphoprotein	13132	ENSMUSG00000022150
A_52_P156190	NA	Ednra	endothelin receptor type A	13617	ENSMUSG00000031616
A_55_P2166501	NA	Cd44	CD44 antigen	12505	ENSMUSG00000005087
A_55_P1962946	NA	Syk	spleen tyrosine kinase	20963	ENSMUSG00000021457
A_55_P1984023	NA	Arrb2	arrestin, beta 2	216869	ENSMUSG00000060216
A_55_P1957249	NA	Pdgfrb	platelet derived growth factor receptor, beta polypeptide	18596	ENSMUSG00000024620
A_51_P506683	NA	Fbxw7	F-box and WD-40 domain protein 7	50754	ENSMUSG00000028086
biological process	organic acid metabolic process	GO:0006082
C=732;O=35;E=18.22;R=1.92;rawP=0.0002;adjP=0.0327
A_51_P396385	NA	Mars2	methionine-tRNA synthetase 2 (mitochondrial)	212679	ENSMUSG00000046994
A_51_P443293	NA	Decr2	2-4-dienoyl-Coenzyme A reductase 2, peroxisomal	26378	ENSMUSG00000036775
A_52_P745	NA	Acox3	acyl-Coenzyme A oxidase 3, pristanoyl	80911	ENSMUSG00000029098
A_55_P2013858	NA	Acad8	acyl-Coenzyme A dehydrogenase family, member 8	66948	ENSMUSG00000031969
A_51_P505662	NA	4933437F05Rik	RIKEN cDNA 4933437F05 gene	71275	ENSMUSG00000072919
A_66_P106836	NA	Kmo	kynurenine 3-monooxygenase (kynurenine 3-hydroxylase)	98256	ENSMUSG00000039783
A_51_P235687	NA	Alox5ap	arachidonate 5-lipoxygenase activating protein	11690	ENSMUSG00000060063
A_51_P461429	NA	Cyp7b1	cytochrome P450, family 7, subfamily b, polypeptide 1	13123	ENSMUSG00000039519
A_51_P289742	NA	Slc27a5	solute carrier family 27 (fatty acid transporter), member 5	26459	ENSMUSG00000030382
A_52_P191086	NA	Kcnj6	potassium inwardly-rectifying channel, subfamily J, member 6	16522	ENSMUSG00000043301
A_55_P2074366	NA	Yars	tyrosyl-tRNA synthetase	107271	ENSMUSG00000028811
A_55_P2003483	NA	Gldc	glycine decarboxylase	104174	ENSMUSG00000024827
A_55_P2031636	NA	Igf1	insulin-like growth factor 1	16000	ENSMUSG00000020053
A_55_P2002727	NA	Inpp4a	inositol polyphosphate-4-phosphatase, type I	269180	ENSMUSG00000026113
A_55_P2060107	NA	Pkm	pyruvate kinase, muscle	18746	ENSMUSG00000032294
A_55_P2051313	NA	Gstk1	glutathione S-transferase kappa 1	76263	ENSMUSG00000029864
A_51_P150120	NA	Mgst2	microsomal glutathione S-transferase 2	211666	ENSMUSG00000074604
A_55_P2100715	NA	Auh	AU RNA binding protein/enoyl-coenzyme A hydratase	11992	ENSMUSG00000021460
A_51_P511899	NA	Mthfsd	methenyltetrahydrofolate synthetase domain containing	234814	ENSMUSG00000031816
A_55_P1953919	NA	Me3	malic enzyme 3, NADP(+)-dependent, mitochondrial	109264	ENSMUSG00000030621
A_51_P424532	NA	Vnn1	vanin 1	22361	ENSMUSG00000037440
A_55_P2119463	NA	Ggh	gamma-glutamyl hydrolase	14590	ENSMUSG00000073987
A_51_P452768	NA	Cyp4f14	cytochrome P450, family 4, subfamily f, polypeptide 14	64385	ENSMUSG00000024292
A_55_P2152962	NA	Mtr	5-methyltetrahydrofolate-homocysteine methyltransferase	238505	ENSMUSG00000021311
A_55_P2171413	NA	Me1	malic enzyme 1, NADP(+)-dependent, cytosolic	17436	ENSMUSG00000032418
A_55_P2009952	NA	Me1	malic enzyme 1, NADP(+)-dependent, cytosolic	17436	ENSMUSG00000032418
A_51_P350048	NA	Gstt2	glutathione S-transferase, theta 2	14872	ENSMUSG00000033318
A_55_P2044463	NA	Lipt2	lipoyl(octanoyl) transferase 2 (putative)	67164	ENSMUSG00000030725
A_51_P108659	NA	Pon1	paraoxonase 1	18979	ENSMUSG00000002588
A_55_P2142439	NA	Echdc2	enoyl Coenzyme A hydratase domain containing 2	52430	ENSMUSG00000028601
A_66_P123787	NA	Lars2	leucyl-tRNA synthetase, mitochondrial	102436	ENSMUSG00000035202
A_51_P229655	NA	Acsm5	acyl-CoA synthetase medium-chain family member 5	272428	ENSMUSG00000030972
A_55_P2122200	NA	Prkar2b	protein kinase, cAMP dependent regulatory, type II beta	19088	ENSMUSG00000002997
A_51_P510764	NA	Agmo	alkylglycerol monooxygenase	319660	ENSMUSG00000050103
A_51_P408584	NA	Enpp1	ectonucleotide pyrophosphatase/phosphodiesterase 1	18605	ENSMUSG00000037370
A_51_P506045	NA	Pgcp	plasma glutamate carboxypeptidase	54381	ENSMUSG00000039007
biological process	nitrogen compound metabolic process	GO:0006807
C=4908;O=157;E=122.19;R=1.28;rawP=0.0003;adjP=0.0450
A_52_P478236	NA	Wrn	Werner syndrome homolog (human)	22427	ENSMUSG00000031583
A_55_P2149269	NA	Galt	galactose-1-phosphate uridyl transferase	14430	ENSMUSG00000036073
A_55_P2118799	NA	Rmi1	RMI1, RecQ mediated genome instability 1, homolog (S. cerevisiae)	74386	ENSMUSG00000035367
A_55_P1961140	NA	Mettl3	methyltransferase like 3	56335	ENSMUSG00000022160
A_55_P2097729	NA	Gtpbp4	GTP binding protein 4	69237	ENSMUSG00000021149
A_55_P1998354	NA	Wbp4	WW domain binding protein 4	22380	ENSMUSG00000022023
A_51_P505662	NA	4933437F05Rik	RIKEN cDNA 4933437F05 gene	71275	ENSMUSG00000072919
A_66_P106836	NA	Kmo	kynurenine 3-monooxygenase (kynurenine 3-hydroxylase)	98256	ENSMUSG00000039783
A_55_P2012552	NA	Nap1l5	nucleosome assembly protein 1-like 5	58243	ENSMUSG00000055430
A_55_P2045792	NA	Pes1	pescadillo homolog 1, containing BRCT domain (zebrafish)	64934	ENSMUSG00000020430
A_55_P2074366	NA	Yars	tyrosyl-tRNA synthetase	107271	ENSMUSG00000028811
A_55_P2324712	NA	Dmrt1	doublesex and mab-3 related transcription factor 1	50796	ENSMUSG00000024837
A_51_P232858	NA	Rpl14	ribosomal protein L14	67115	ENSMUSG00000025794
A_51_P235440	NA	Pelp1	proline, glutamic acid and leucine rich protein 1	75273	ENSMUSG00000018921
A_55_P1966878	NA	Rnaseh2a	ribonuclease H2, large subunit	69724	ENSMUSG00000052926
A_51_P400463	NA	Agmat	agmatine ureohydrolase (agmatinase)	75986	ENSMUSG00000040706
A_51_P441469	NA	Jmy	junction-mediating and regulatory protein	57748	ENSMUSG00000021690
A_55_P2237129	NA	St6galnac5	ST6 (alpha-N-acetyl-neuraminyl-2,3-beta-galactosyl-1,3)-N-acetylgalactosaminide alpha-2,6-sialyltransferase 5	26938	ENSMUSG00000039037
A_55_P2107957	NA	Fam175a	family with sequence similarity 175, member A	70681	ENSMUSG00000035234
A_51_P424532	NA	Vnn1	vanin 1	22361	ENSMUSG00000037440
A_52_P439263	NA	Ugt8a	UDP galactosyltransferase 8A	22239	ENSMUSG00000032854
A_55_P2037712	NA	Smc4	structural maintenance of chromosomes 4	70099	ENSMUSG00000034349
[truncated: 6,191 more rows]
