# Supplementary material for: Genetic Background Modulates lncRNA-Coordinated Tissue Response to Low Dose Ionizing Radiation
Source: Int J Genomics. 2015 Feb 23;2015:461038. doi: 10.1155/2015/461038 (PMC4353441; doi:10.1155/2015/461038)
Supplement: Supplementary file 1 — Supplementary Data: The supplementary data include supplementary tables (S1 to S4) and supplementary figures (S1 to S3). Table S1: LncRNA and mRNA mammary tissue expression signatures of strain differences and after LDIR. Table S2: Baseline gene expression differences in mammary gland tissue of BALB/c and SPRET/EiJ are associated with diverse biological funcitons. Table S3: Upstream transcriptional regulators associated with low-dose radiation response in mammary glands of BALB/c and SPRET/EiJ mice. Table S4: Correlations between lncRNA and coding RNA expression in BALB/c and SPRET/EiJ mammary tissues after LDIR exposure. Figure S1: LncRNA and coding RNA expression changes in mammary tissues of BALB/c and SPRET/EiJ mice. For each time-point, differentially expressed lncRNA (A) or coding RNAs (B) between sham and low-dose irradiated glands were identified by the unpaired Student's t-test with a p-value cut-off of 0.05 and a fold change criteria of more than 1.5. C. Comparison of differentially expressed lncRNAs (left) and coding RNAs (right) in BALB/c and SPRET/EiJ mice four weeks after LDIR exposure. (BC=BALB/c; SPR=SPRET/EiJ; lnc=lncRNA; cd=coding gene). Figure S2: LncRNA and coding RNA expression levels are correlated in mammary tissues after low dose radiation exposure. Representative examples of networks of the same lncRNAs (pink) significantly correlated in expression with mRNAs (purple) after LDIR in mammary tissues of BALB/c mice at 2 and 4 weeks after exposure, 4 and 8 weeks after exposure and 2 and 8 weeks after exposure. Figure S3: Annotation of the molecular shapes used in gene interaction networks. Graphical representation of commonly used molecular shapes in interaction networks generated by Ingenuity Pathway Analysis. [file 461038.f1.zip › Table_S4_correlations.xlsx]

## Sheet: BALBc_Wk2
Table S4. Correlations between lncRNA and coding RNA expression in BALB/c and SPRET/EiJ mammary tissues after LDIR exposure.
Correlation #	Coding RNA #	Linc RNA	Coding RNA	correlation	p-value			Unique Linc RNA
1	1	A_30_P01017522	A_51_P117087	0.785714	0.0105			A_30_P01017522
2	2	A_30_P01017522	A_51_P137452	0.880952	0.0028			A_30_P01017533
3	3	A_30_P01017522	A_51_P192203	0.738095	0.0173			A_30_P01017704
4	4	A_30_P01017522	A_51_P249104	0.857143	0.004			A_30_P01017734
5	5	A_30_P01017522	A_51_P303316	0.714286	0.0207			A_30_P01017766
6	6	A_30_P01017522	A_51_P433887	0.857143	0.0039			A_30_P01017800
7	7	A_30_P01017522	A_52_P209514	0.761905	0.0136			A_30_P01017815
8	8	A_30_P01017522	A_52_P229981	0.809524	0.0083			A_30_P01017854
9	9	A_30_P01017522	A_52_P487436	0.714286	0.022			A_30_P01017907
10	10	A_30_P01017522	A_52_P628915	0.714286	0.0227			A_30_P01017935
11	11	A_30_P01017522	A_52_P684087	0.738095	0.019			A_30_P01017970
12	12	A_30_P01017522	A_55_P1954452	0.833333	0.0057			A_30_P01017995
13	13	A_30_P01017522	A_55_P1967473	0.880952	0.0028			A_30_P01018024
14	14	A_30_P01017522	A_55_P1969152	0.809524	0.0068			A_30_P01018105
15	15	A_30_P01017522	A_55_P1974760	0.714286	0.0215			A_30_P01018126
16	16	A_30_P01017522	A_55_P1980550	0.761905	0.0133			A_30_P01018275
17	17	A_30_P01017522	A_55_P1981035	0.857143	0.0043			A_30_P01018283
18	18	A_30_P01017522	A_55_P1987117	0.97619	0			A_30_P01018536
19	19	A_30_P01017522	A_55_P2002469	0.809524	0.007			A_30_P01018545
20	20	A_30_P01017522	A_55_P2012071	0.857143	0.0029			A_30_P01018712
21	21	A_30_P01017522	A_55_P2015635	0.785714	0.0108			A_30_P01018774
22	22	A_30_P01017522	A_55_P2021816	0.738095	0.0187			A_30_P01018855
23	23	A_30_P01017522	A_55_P2029031	0.738095	0.0187			A_30_P01018912
24	24	A_30_P01017522	A_55_P2029581	0.738095	0.0201			A_30_P01018984
25	25	A_30_P01017522	A_55_P2044528	0.738095	0.017			A_30_P01018997
26	26	A_30_P01017522	A_55_P2048550	0.833333	0.0052			A_30_P01019002
27	27	A_30_P01017522	A_55_P2057430	0.880952	0.0027			A_30_P01019021
28	28	A_30_P01017522	A_55_P2071142	0.833333	0.0051			A_30_P01019040
29	29	A_30_P01017522	A_55_P2088846	0.833333	0.0064			A_30_P01019171
30	30	A_30_P01017522	A_55_P2090299	0.833333	0.0084			A_30_P01019249
31	31	A_30_P01017522	A_55_P2105239	0.761905	0.0138			A_30_P01019318
32	32	A_30_P01017522	A_55_P2110210	0.785714	0.0116			A_30_P01019340
33	33	A_30_P01017522	A_55_P2123045	0.738095	0.0179			A_30_P01019373
34	34	A_30_P01017522	A_55_P2150580	0.761905	0.0138			A_30_P01019564
35	35	A_30_P01017522	A_55_P2164932	0.833333	0.0048			A_30_P01019579
36	36	A_30_P01017522	A_55_P2170464	0.761905	0.0153			A_30_P01019691
37	37	A_30_P01017522	A_55_P2174386	0.761905	0.0158			A_30_P01019778
38	38	A_30_P01017522	A_55_P2176898	0.738095	0.0181			A_30_P01019875
39	39	A_30_P01017522	A_55_P2184511	0.714286	0.0219			A_30_P01019893
40	40	A_30_P01017522	A_55_P2185410	0.761905	0.0165			A_30_P01019964
41	41	A_30_P01017522	A_55_P2243237	1	0			A_30_P01020000
42	42	A_30_P01017522	A_55_P2340820	0.880952	0.0018			A_30_P01020037
43	43	A_30_P01017522	A_55_P2421222	0.857143	0.0029			A_30_P01020097
44	44	A_30_P01017522	A_66_P114616	0.809524	0.007			A_30_P01020126
45	45	A_30_P01017522	A_66_P119812	0.714286	0.0217			A_30_P01020232
46	46	A_30_P01017522	A_66_P120970	0.857143	0.0044			A_30_P01020339
47	47	A_30_P01017522	A_66_P125538	0.857143	0.0044			A_30_P01020378
48	48	A_30_P01017522	A_66_P135885	0.857143	0.0034			A_30_P01020389
49	49	A_30_P01017522	A_66_P136032	0.928571	0.0002			A_30_P01020416
50	50	A_30_P01017522	A_55_P2113021	-0.714286	0.0206			A_30_P01020417
51	51	A_30_P01017522	A_55_P2142928	-0.738095	0.0188			A_30_P01020470
52	52	A_30_P01017522	A_55_P2328082	-0.761905	0.0164			A_30_P01020486
53	1	A_30_P01017533	A_51_P137452	0.761905	0.0143			A_30_P01020747
54	2	A_30_P01017533	A_51_P206165	0.738095	0.0201			A_30_P01020756
55	3	A_30_P01017533	A_51_P206235	0.714286	0.0243			A_30_P01020786
56	4	A_30_P01017533	A_51_P249104	0.833333	0.0065			A_30_P01020799
57	5	A_30_P01017533	A_51_P303316	0.738095	0.0195			A_30_P01020870
58	6	A_30_P01017533	A_51_P379698	0.761905	0.0143			A_30_P01020891
59	7	A_30_P01017533	A_51_P398833	0.738095	0.0171			A_30_P01020919
60	8	A_30_P01017533	A_51_P433887	0.880952	0.0021			A_30_P01020928
61	9	A_30_P01017533	A_52_P1516	0.714286	0.0243			A_30_P01021068
62	10	A_30_P01017533	A_52_P21951	0.714286	0.024			A_30_P01021118
63	11	A_30_P01017533	A_52_P229981	0.809524	0.0073			A_30_P01021121
64	12	A_30_P01017533	A_52_P628915	0.785714	0.0107			A_30_P01021163
65	13	A_30_P01017533	A_52_P684087	0.833333	0.0059			A_30_P01021286
66	14	A_30_P01017533	A_55_P1957866	0.785714	0.0108			A_30_P01021407
67	15	A_30_P01017533	A_55_P1967473	0.880952	0.0021			A_30_P01021408
68	16	A_30_P01017533	A_55_P1969231	0.714286	0.0235			A_30_P01021466
69	17	A_30_P01017533	A_55_P1981035	0.833333	0.0049			A_30_P01021494
70	18	A_30_P01017533	A_55_P1982991	0.738095	0.0198			A_30_P01021501
71	19	A_30_P01017533	A_55_P1987117	0.809524	0.007			A_30_P01021549
72	20	A_30_P01017533	A_55_P1988658	0.809524	0.0078			A_30_P01021580
73	21	A_30_P01017533	A_55_P1997421	0.761905	0.0121			A_30_P01021628
74	22	A_30_P01017533	A_55_P2000978	0.857143	0.0038			A_30_P01021661
75	23	A_30_P01017533	A_55_P2002469	0.809524	0.0091			A_30_P01021967
76	24	A_30_P01017533	A_55_P2006460	0.714286	0.0239			A_30_P01022080
77	25	A_30_P01017533	A_55_P2021816	0.833333	0.0043			A_30_P01022117
78	26	A_30_P01017533	A_55_P2029581	0.952381	0.0002			A_30_P01022255
79	27	A_30_P01017533	A_55_P2044528	0.833333	0.0054			A_30_P01022260
80	28	A_30_P01017533	A_55_P2050962	0.785714	0.011			A_30_P01022504
81	29	A_30_P01017533	A_55_P2057557	0.809524	0.0072			A_30_P01022533
82	30	A_30_P01017533	A_55_P2081198	0.833333	0.0066			A_30_P01022664
83	31	A_30_P01017533	A_55_P2090299	0.714286	0.0221			A_30_P01022677
84	32	A_30_P01017533	A_55_P2104997	0.809524	0.008			A_30_P01022780
85	33	A_30_P01017533	A_55_P2105195	0.761905	0.0141			A_30_P01022819
86	34	A_30_P01017533	A_55_P2109927	0.714286	0.0232			A_30_P01022882
87	35	A_30_P01017533	A_55_P2110210	0.761905	0.0142			A_30_P01022901
88	36	A_30_P01017533	A_55_P2111603	0.714286	0.0216			A_30_P01022937
89	37	A_30_P01017533	A_55_P2117475	0.761905	0.0153			A_30_P01023050
90	38	A_30_P01017533	A_55_P2124582	0.761905	0.0139			A_30_P01023158
91	39	A_30_P01017533	A_55_P2143085	0.714286	0.0207			A_30_P01023176
92	40	A_30_P01017533	A_55_P2152292	0.809524	0.0069			A_30_P01023185
93	41	A_30_P01017533	A_55_P2164890	0.761905	0.0125			A_30_P01023203
94	42	A_30_P01017533	A_55_P2164932	0.952381	0.0003			A_30_P01023242
95	43	A_30_P01017533	A_55_P2184023	0.880952	0.0018			A_30_P01023287
96	44	A_30_P01017533	A_55_P2184209	0.904762	0.0015			A_30_P01023332
97	45	A_30_P01017533	A_55_P2193487	0.880952	0.003			A_30_P01023391
98	46	A_30_P01017533	A_55_P2243237	0.738095	0.0183			A_30_P01023407
99	47	A_30_P01017533	A_55_P2250391	-0.714286	0.0214			A_30_P01023431
100	48	A_30_P01017533	A_55_P2329660	0.761905	0.013			A_30_P01023435
101	49	A_30_P01017533	A_55_P2340820	0.761905	0.0141			A_30_P01023560
102	50	A_30_P01017533	A_55_P2421222	0.952381	0.0004			A_30_P01023565
103	51	A_30_P01017533	A_66_P119812	0.809524	0.0071			A_30_P01023705
104	52	A_30_P01017533	A_66_P136032	0.857143	0.0031			A_30_P01023780
105	53	A_30_P01017533	A_51_P126337	-0.761905	0.0146			A_30_P01023838
106	54	A_30_P01017533	A_51_P271136	-0.761905	0.014			A_30_P01023854
107	55	A_30_P01017533	A_51_P298615	-0.761905	0.0131			A_30_P01023988
108	56	A_30_P01017533	A_51_P351970	0.714286	0.0219			A_30_P01024135
109	57	A_30_P01017533	A_51_P392303	-0.785714	0.0118			A_30_P01024157
110	58	A_30_P01017533	A_55_P1954086	-0.714286	0.0234			A_30_P01024242
111	59	A_30_P01017533	A_55_P1963547	-0.738095	0.0177			A_30_P01024249
112	60	A_30_P01017533	A_55_P2001818	-0.785714	0.0103			A_30_P01024313
113	61	A_30_P01017533	A_55_P2084348	-0.761905	0.0136			A_30_P01024458
114	62	A_30_P01017533	A_55_P2093039	-0.761905	0.0136			A_30_P01024475
115	63	A_30_P01017533	A_55_P2126590	-0.928571	0.0005			A_30_P01024556
116	64	A_30_P01017533	A_55_P2129281	-0.761905	0.0108			A_30_P01024585
117	65	A_30_P01017533	A_55_P2157978	-0.809524	0.0073			A_30_P01024601
118	66	A_30_P01017533	A_55_P2328082	-0.738095	0.021			A_30_P01024614
119	1	A_30_P01017704	A_51_P117087	0.761905	0.0138			A_30_P01024622
120	2	A_30_P01017704	A_51_P121607	0.714286	0.0239			A_30_P01024635
121	3	A_30_P01017704	A_51_P137452	0.904762	0.001			A_30_P01024690
122	4	A_30_P01017704	A_51_P192203	0.809524	0.0078			A_30_P01024693
123	5	A_30_P01017704	A_51_P206165	0.761905	0.0149			A_30_P01024710
124	6	A_30_P01017704	A_51_P206235	0.714286	0.024			A_30_P01024713
125	7	A_30_P01017704	A_51_P223724	0.714286	0.023			A_30_P01024763
126	8	A_30_P01017704	A_51_P249104	0.880952	0.0026			A_30_P01024797
127	9	A_30_P01017704	A_51_P273157	0.714286	0.0224			A_30_P01024830
128	10	A_30_P01017704	A_51_P391934	0.809524	0.0063			A_30_P01024926
129	11	A_30_P01017704	A_51_P398833	0.714286	0.0206			A_30_P01025062
130	12	A_30_P01017704	A_51_P433887	0.904762	0.0009			A_30_P01025069
131	13	A_30_P01017704	A_51_P459944	0.738095	0.0171			A_30_P01025088
132	14	A_30_P01017704	A_52_P209514	0.857143	0.0037			A_30_P01025100
133	15	A_30_P01017704	A_52_P229981	0.761905	0.0136			A_30_P01025166
134	16	A_30_P01017704	A_52_P487436	0.761905	0.0144			A_30_P01025176
135	17	A_30_P01017704	A_52_P628915	0.761905	0.0124			A_30_P01025199
136	18	A_30_P01017704	A_52_P684087	0.714286	0.0211			A_30_P01025226
137	19	A_30_P01017704	A_55_P1954452	0.738095	0.0188			A_30_P01025398
138	20	A_30_P01017704	A_55_P1967473	0.904762	0.001			A_30_P01025436
139	21	A_30_P01017704	A_55_P1969152	0.833333	0.0058			A_30_P01025605
140	22	A_30_P01017704	A_55_P1980550	0.809524	0.0085			A_30_P01025656
141	23	A_30_P01017704	A_55_P1981035	0.880952	0.0019			A_30_P01025709
142	24	A_30_P01017704	A_55_P1982467	0.714286	0.0234			A_30_P01025788
143	25	A_30_P01017704	A_55_P1987117	0.952381	0.0003			A_30_P01025791
144	26	A_30_P01017704	A_55_P2000978	0.714286	0.0237			A_30_P01025840
145	27	A_30_P01017704	A_55_P2002469	0.761905	0.0134			A_30_P01025884
146	28	A_30_P01017704	A_55_P2012071	0.761905	0.0136			A_30_P01025972
147	29	A_30_P01017704	A_55_P2015635	0.880952	0.0023			A_30_P01025976
148	30	A_30_P01017704	A_55_P2021816	0.785714	0.0125			A_30_P01025990
149	31	A_30_P01017704	A_55_P2029031	0.761905	0.0142			A_30_P01025998
150	32	A_30_P01017704	A_55_P2031681	0.809524	0.0072			A_30_P01026093
151	33	A_30_P01017704	A_55_P2042177	0.761905	0.0144			A_30_P01026235
152	34	A_30_P01017704	A_55_P2044528	0.761905	0.0127			A_30_P01026264
153	35	A_30_P01017704	A_55_P2048550	0.785714	0.0094			A_30_P01026334
154	36	A_30_P01017704	A_55_P2050962	0.761905	0.0152			A_30_P01026348
155	37	A_30_P01017704	A_55_P2056443	0.738095	0.0187			A_30_P01026378
156	38	A_30_P01017704	A_55_P2057430	0.928571	0.0005			A_30_P01026438
157	39	A_30_P01017704	A_55_P2063486	0.738095	0.0188			A_30_P01026563
158	40	A_30_P01017704	A_55_P2071142	0.904762	0.0018			A_30_P01026772
159	41	A_30_P01017704	A_55_P2075962	0.714286	0.0238			A_30_P01026816
160	42	A_30_P01017704	A_55_P2081761	0.714286	0.0229			A_30_P01026827
161	43	A_30_P01017704	A_55_P2083304	0.738095	0.0206			A_30_P01026832
162	44	A_30_P01017704	A_55_P2084606	0.785714	0.0103			A_30_P01026892
163	45	A_30_P01017704	A_55_P2088846	0.904762	0.0017			A_30_P01026960
164	46	A_30_P01017704	A_55_P2090299	0.880952	0.0022			A_30_P01026990
165	47	A_30_P01017704	A_55_P2105239	0.809524	0.0085			A_30_P01026994
166	48	A_30_P01017704	A_55_P2107681	0.761905	0.0143			A_30_P01027005
167	49	A_30_P01017704	A_55_P2108813	0.714286	0.0243			A_30_P01027298
168	50	A_30_P01017704	A_55_P2110210	0.809524	0.0076			A_30_P01027459
169	51	A_30_P01017704	A_55_P2123045	0.761905	0.0129			A_30_P01027595
170	52	A_30_P01017704	A_55_P2127194	0.714286	0.0241			A_30_P01027622
171	53	A_30_P01017704	A_55_P2134336	0.761905	0.0118			A_30_P01027673
172	54	A_30_P01017704	A_55_P2150580	0.857143	0.0041			A_30_P01027793
173	55	A_30_P01017704	A_55_P2164932	0.809524	0.0075			A_30_P01027799
174	56	A_30_P01017704	A_55_P2170464	0.857143	0.0041			A_30_P01027810
175	57	A_30_P01017704	A_55_P2174386	0.738095	0.0162			A_30_P01027853
176	58	A_30_P01017704	A_55_P2176898	0.809524	0.0076			A_30_P01027922
177	59	A_30_P01017704	A_55_P2184511	0.809524	0.0081			A_30_P01027997
178	60	A_30_P01017704	A_55_P2185410	0.785714	0.0122			A_30_P01028022
179	61	A_30_P01017704	A_55_P2243237	0.97619	0			A_30_P01028127
180	62	A_30_P01017704	A_55_P2247021	0.833333	0.0061			A_30_P01028172
181	63	A_30_P01017704	A_55_P2340820	0.928571	0.0004			A_30_P01028214
182	64	A_30_P01017704	A_55_P2421222	0.809524	0.0094			A_30_P01028341
183	65	A_30_P01017704	A_66_P114616	0.761905	0.0117			A_30_P01028390
184	66	A_30_P01017704	A_66_P119812	0.738095	0.0171			A_30_P01028478
185	67	A_30_P01017704	A_66_P120970	0.904762	0.0011			A_30_P01028498
186	68	A_30_P01017704	A_66_P125538	0.928571	0.0003			A_30_P01028516
187	69	A_30_P01017704	A_66_P135885	0.833333	0.0044			A_30_P01028564
188	70	A_30_P01017704	A_66_P136032	0.880952	0.0026			A_30_P01028656
189	71	A_30_P01017704	A_51_P126337	-0.714286	0.0221			A_30_P01028694
190	72	A_30_P01017704	A_55_P2113021	-0.738095	0.0183			A_30_P01028767
191	73	A_30_P01017704	A_55_P2328082	-0.833333	0.0059			A_30_P01028771
192	1	A_30_P01017734	A_51_P126275	0.785714	0.0094			A_30_P01028982
193	2	A_30_P01017734	A_51_P167597	0.785714	0.012			A_30_P01029000
194	3	A_30_P01017734	A_51_P210732	0.880952	0.0023			A_30_P01029025
195	4	A_30_P01017734	A_51_P257841	0.904762	0.0013			A_30_P01029103
196	5	A_30_P01017734	A_51_P288541	0.714286	0.0222			A_30_P01029116
197	6	A_30_P01017734	A_51_P308912	0.738095	0.0207			A_30_P01029130
198	7	A_30_P01017734	A_51_P324473	0.904762	0.0013			A_30_P01029275
199	8	A_30_P01017734	A_51_P348217	0.809524	0.0079			A_30_P01029334
200	9	A_30_P01017734	A_51_P442118	0.809524	0.0069			A_30_P01029344
201	10	A_30_P01017734	A_52_P117408	0.952381	0.0001			A_30_P01029352
202	11	A_30_P01017734	A_52_P363843	0.785714	0.0114			A_30_P01029361
203	12	A_30_P01017734	A_52_P551844	0.714286	0.0223			A_30_P01029394
204	13	A_30_P01017734	A_52_P612251	0.714286	0.0239			A_30_P01029466
205	14	A_30_P01017734	A_55_P1959122	0.880952	0.0014			A_30_P01029496
206	15	A_30_P01017734	A_55_P1966216	0.714286	0.0236			A_30_P01029591
207	16	A_30_P01017734	A_55_P1969152	0.761905	0.012			A_30_P01029841
208	17	A_30_P01017734	A_55_P1969949	0.833333	0.0064			A_30_P01029854
209	18	A_30_P01017734	A_55_P1977052	0.714286	0.0232			A_30_P01029858
210	19	A_30_P01017734	A_55_P2003883	0.761905	0.0135			A_30_P01029902
211	20	A_30_P01017734	A_55_P2008644	0.738095	0.0173			A_30_P01029904
212	21	A_30_P01017734	A_55_P2012314	0.785714	0.0109			A_30_P01029960
213	22	A_30_P01017734	A_55_P2014853	0.761905	0.0162			A_30_P01030035
214	23	A_30_P01017734	A_55_P2014854	0.857143	0.004			A_30_P01030050
215	24	A_30_P01017734	A_55_P2025328	0.714286	0.0218			A_30_P01030097
216	25	A_30_P01017734	A_55_P2025443	0.761905	0.0146			A_30_P01030103
217	26	A_30_P01017734	A_55_P2026880	0.714286	0.0244			A_30_P01030122
218	27	A_30_P01017734	A_55_P2032009	0.833333	0.005			A_30_P01030130
219	28	A_30_P01017734	A_55_P2033116	0.809524	0.0084			A_30_P01030158
220	29	A_30_P01017734	A_55_P2045040	0.738095	0.0162			A_30_P01030248
221	30	A_30_P01017734	A_55_P2062513	0.785714	0.0118			A_30_P01030275
222	31	A_30_P01017734	A_55_P2075253	0.880952	0.0027			A_30_P01030418
223	32	A_30_P01017734	A_55_P2083963	0.714286	0.023			A_30_P01030449
224	33	A_30_P01017734	A_55_P2088755	0.809524	0.0067			A_30_P01030462
225	34	A_30_P01017734	A_55_P2091616	0.761905	0.013			A_30_P01030477
226	35	A_30_P01017734	A_55_P2093749	0.928571	0.0005			A_30_P01030482
227	36	A_30_P01017734	A_55_P2094044	0.880952	0.0017			A_30_P01030499
228	37	A_30_P01017734	A_55_P2097333	0.785714	0.0095			A_30_P01030551
229	38	A_30_P01017734	A_55_P2100272	0.857143	0.0033			A_30_P01030562
230	39	A_30_P01017734	A_55_P2101957	0.714286	0.0243			A_30_P01030601
231	40	A_30_P01017734	A_55_P2104343	0.714286	0.0206			A_30_P01030632
232	41	A_30_P01017734	A_55_P2111698	0.857143	0.0032			A_30_P01030688
233	42	A_30_P01017734	A_55_P2113335	0.714286	0.0232			A_30_P01030759
234	43	A_30_P01017734	A_55_P2130114	0.928571	0.0003			A_30_P01030836
235	44	A_30_P01017734	A_55_P2139668	0.809524	0.0083			A_30_P01030848
236	45	A_30_P01017734	A_55_P2141043	0.738095	0.017			A_30_P01030880
237	46	A_30_P01017734	A_55_P2144256	0.857143	0.0034			A_30_P01030957
238	47	A_30_P01017734	A_55_P2153961	0.714286	0.0219			A_30_P01030975
239	48	A_30_P01017734	A_55_P2162815	0.833333	0.005			A_30_P01031063
240	49	A_30_P01017734	A_55_P2172693	0.904762	0.0017			A_30_P01031083
241	50	A_30_P01017734	A_55_P2174386	0.738095	0.0192			A_30_P01031106
242	51	A_30_P01017734	A_55_P2201612	0.809524	0.0074			A_30_P01031281
243	52	A_30_P01017734	A_55_P2202598	0.785714	0.0135			A_30_P01031582
244	53	A_30_P01017734	A_55_P2244941	0.952381	0.0002			A_30_P01031640
245	54	A_30_P01017734	A_55_P2267696	0.857143	0.0051			A_30_P01031646
246	55	A_30_P01017734	A_55_P2287260	0.809524	0.0079			A_30_P01031885
247	56	A_30_P01017734	A_55_P2294051	0.714286	0.0229			A_30_P01031909
248	57	A_30_P01017734	A_55_P2361731	0.761905	0.012			A_30_P01031947
249	58	A_30_P01017734	A_66_P133119	0.904762	0.001			A_30_P01032157
250	59	A_30_P01017734	A_66_P140954	0.761905	0.0145			A_30_P01032191
251	60	A_30_P01017734	A_52_P172014	-0.785714	0.0104			A_30_P01032240
252	61	A_30_P01017734	A_52_P404341	0.761905	0.0136			A_30_P01032413
253	62	A_30_P01017734	A_52_P53019	-0.714286	0.0216			A_30_P01032465
254	63	A_30_P01017734	A_52_P589568	-0.880952	0.0017			A_30_P01032520
255	64	A_30_P01017734	A_55_P1962851	-0.761905	0.0152			A_30_P01032523
256	65	A_30_P01017734	A_55_P1972297	-0.857143	0.0037			A_30_P01032540
257	66	A_30_P01017734	A_55_P2019841	-0.785714	0.0116			A_30_P01032849
258	67	A_30_P01017734	A_55_P2053788	-0.714286	0.0226			A_30_P01032881
259	68	A_30_P01017734	A_55_P2057528	-0.714286	0.0216			A_30_P01032907
260	69	A_30_P01017734	A_55_P2130880	0.714286	0.0222			A_30_P01032937
261	70	A_30_P01017734	A_55_P2158011	-0.738095	0.0202			A_30_P01032954
262	71	A_30_P01017734	A_55_P2179027	-0.880952	0.002			A_30_P01033017
263	1	A_30_P01017766	A_51_P117087	0.809524	0.0079			A_30_P01033087
264	2	A_30_P01017766	A_51_P126275	0.97619	0			A_30_P01033172
265	3	A_30_P01017766	A_51_P210732	0.714286	0.0233			A_30_P01033388
266	4	A_30_P01017766	A_51_P324473	0.714286	0.0217			A_30_P01033395
267	5	A_30_P01017766	A_51_P348217	0.952381	0.0001			A_30_P01033397
268	6	A_30_P01017766	A_51_P353735	0.809524	0.0087			A_30_P01033454
269	7	A_30_P01017766	A_51_P414746	0.761905	0.0149			A_30_P01033500
270	8	A_30_P01017766	A_51_P436521	0.738095	0.0186			A_30_P01033542
271	9	A_30_P01017766	A_51_P442118	0.857143	0.0034			A_30_P01017449
272	10	A_30_P01017766	A_52_P122649	-0.738095	0.0181			A_30_P01017487
273	11	A_30_P01017766	A_52_P339742	0.738095	0.0157			A_30_P01018191
274	12	A_30_P01017766	A_52_P363843	0.928571	0.0008			A_30_P01018207
275	13	A_30_P01017766	A_52_P52910	0.809524	0.0074			A_30_P01018236
276	14	A_30_P01017766	A_52_P661044	0.738095	0.0201			A_30_P01018362
277	15	A_30_P01017766	A_52_P662711	0.785714	0.0105			A_30_P01018412
278	16	A_30_P01017766	A_55_P1959122	0.928571	0.0003			A_30_P01018522
279	17	A_30_P01017766	A_55_P1971571	0.690476	0.0248			A_30_P01018838
280	18	A_30_P01017766	A_55_P1987800	0.714286	0.0248			A_30_P01019515
281	19	A_30_P01017766	A_55_P1989225	0.714286	0.0225			A_30_P01019900
282	20	A_30_P01017766	A_55_P1989449	0.928571	0.0006			A_30_P01020408
283	21	A_30_P01017766	A_55_P2008644	0.928571	0.0007			A_30_P01020515
284	22	A_30_P01017766	A_55_P2008801	0.857143	0.0047			A_30_P01020655
285	23	A_30_P01017766	A_55_P2014853	0.738095	0.0189			A_30_P01020691
286	24	A_30_P01017766	A_55_P2017377	0.738095	0.0187			A_30_P01020806
287	25	A_30_P01017766	A_55_P2025173	0.738095	0.0185			A_30_P01021009
288	26	A_30_P01017766	A_55_P2031068	0.714286	0.0231			A_30_P01021060
289	27	A_30_P01017766	A_55_P2032009	0.785714	0.0105			A_30_P01021064
290	28	A_30_P01017766	A_55_P2032548	0.738095	0.0164			A_30_P01021156
291	29	A_30_P01017766	A_55_P2033116	0.904762	0.0012			A_30_P01021159
292	30	A_30_P01017766	A_55_P2045040	0.785714	0.0105			A_30_P01021413
293	31	A_30_P01017766	A_55_P2048550	0.714286	0.0242			A_30_P01021468
294	32	A_30_P01017766	A_55_P2074165	0.785714	0.0114			A_30_P01021504
295	33	A_30_P01017766	A_55_P2075253	0.880952	0.0017			A_30_P01021652
296	34	A_30_P01017766	A_55_P2083317	0.738095	0.018			A_30_P01021708
297	35	A_30_P01017766	A_55_P2088846	0.714286	0.0235			A_30_P01021804
298	36	A_30_P01017766	A_55_P2089858	0.833333	0.0059			A_30_P01021817
299	37	A_30_P01017766	A_55_P2097333	0.761905	0.0145			A_30_P01021829
300	38	A_30_P01017766	A_55_P2100272	0.904762	0.0014			A_30_P01022291
301	39	A_30_P01017766	A_55_P2111698	0.785714	0.01			A_30_P01022355
302	40	A_30_P01017766	A_55_P2123045	0.785714	0.0105			A_30_P01022471
303	41	A_30_P01017766	A_55_P2130114	0.809524	0.0071			A_30_P01022554
304	42	A_30_P01017766	A_55_P2139668	0.738095	0.018			A_30_P01023080
305	43	A_30_P01017766	A_55_P2140764	0.714286	0.0215			A_30_P01023200
306	44	A_30_P01017766	A_55_P2141043	0.761905	0.0136			A_30_P01023837
307	45	A_30_P01017766	A_55_P2159155	0.761905	0.0139			A_30_P01024101
308	46	A_30_P01017766	A_55_P2172106	0.809524	0.0069			A_30_P01024236
309	47	A_30_P01017766	A_55_P2172693	0.761905	0.0157			A_30_P01024660
310	48	A_30_P01017766	A_55_P2185410	0.761905	0.0135			A_30_P01024820
311	49	A_30_P01017766	A_55_P2201612	0.714286	0.0217			A_30_P01024944
312	50	A_30_P01017766	A_55_P2244941	0.857143	0.0037			A_30_P01025063
313	51	A_30_P01017766	A_55_P2267696	0.785714	0.0102			A_30_P01025073
314	52	A_30_P01017766	A_66_P100496	0.809524	0.0078			A_30_P01025227
315	53	A_30_P01017766	A_66_P123836	0.761905	0.0143			A_30_P01025275
316	54	A_30_P01017766	A_66_P133119	0.857143	0.0033			A_30_P01025381
317	55	A_30_P01017766	A_66_P140954	0.738095	0.0185			A_30_P01025844
318	56	A_30_P01017766	A_51_P234847	-0.952381	0.0001			A_30_P01026066
319	57	A_30_P01017766	A_51_P374991	-0.714286	0.0238			A_30_P01026715
320	58	A_30_P01017766	A_52_P236398	0.761905	0.0144			A_30_P01026729
321	59	A_30_P01017766	A_52_P404341	0.785714	0.011			A_30_P01026753
322	60	A_30_P01017766	A_52_P589568	-0.833333	0.0053			A_30_P01026793
323	61	A_30_P01017766	A_52_P70854	-0.809524	0.0068			A_30_P01027318
324	62	A_30_P01017766	A_55_P2006668	-0.714286	0.022			A_30_P01027453
325	63	A_30_P01017766	A_55_P2018116	-0.738095	0.0192			A_30_P01027509
326	64	A_30_P01017766	A_55_P2019841	-0.738095	0.0171			A_30_P01027625
327	65	A_30_P01017766	A_55_P2044932	0.761905	0.0127			A_30_P01027629
328	66	A_30_P01017766	A_55_P2090280	0.761905	0.0125			A_30_P01028062
329	67	A_30_P01017766	A_55_P2130880	0.714286	0.0246			A_30_P01028476
330	68	A_30_P01017766	A_55_P2160181	-0.714286	0.0215			A_30_P01028563
331	69	A_30_P01017766	A_55_P2174661	0.809524	0.0082			A_30_P01029129
332	70	A_30_P01017766	A_55_P2179027	-0.738095	0.0188			A_30_P01029478
333	71	A_30_P01017766	A_55_P2322104	-0.714286	0.0229			A_30_P01029574
334	72	A_30_P01017766	A_66_P110707	0.714286	0.0232			A_30_P01029592
335	1	A_30_P01017800	A_51_P186899	0.833333	0.0051			A_30_P01030180
336	2	A_30_P01017800	A_51_P193189	0.952381	0.0001			A_30_P01030389
337	3	A_30_P01017800	A_51_P205334	0.809524	0.0075			A_30_P01030851
338	4	A_30_P01017800	A_51_P257841	0.809524	0.0058			A_30_P01031115
339	5	A_30_P01017800	A_51_P288541	0.738095	0.0176			A_30_P01031266
340	6	A_30_P01017800	A_51_P324473	0.761905	0.0146			A_30_P01031546
341	7	A_30_P01017800	A_51_P348217	0.761905	0.016			A_30_P01031603
342	8	A_30_P01017800	A_51_P353735	0.833333	0.0052			A_30_P01032107
343	9	A_30_P01017800	A_51_P414746	0.714286	0.024			A_30_P01032342
344	10	A_30_P01017800	A_52_P24439	0.928571	0.0004			A_30_P01032402
345	11	A_30_P01017800	A_52_P339742	0.833333	0.0056			A_30_P01032439
346	12	A_30_P01017800	A_52_P404942	0.904762	0.0008			A_30_P01032488
347	13	A_30_P01017800	A_52_P52910	0.761905	0.0155			A_30_P01032834
348	14	A_30_P01017800	A_52_P551844	0.833333	0.0045			A_30_P01032970
349	15	A_30_P01017800	A_52_P612251	0.714286	0.0245			A_30_P01033015
350	16	A_30_P01017800	A_55_P1952469	0.761905	0.0144			A_30_P01033103
351	17	A_30_P01017800	A_55_P1959122	0.833333	0.0052			A_30_P01033106
352	18	A_30_P01017800	A_55_P1964138	0.761905	0.0146			A_30_P01033184
353	19	A_30_P01017800	A_55_P1968603	0.809524	0.0065			A_30_P01033192
354	20	A_30_P01017800	A_55_P1968683	0.714286	0.0212			A_30_P01033370
355	21	A_30_P01017800	A_55_P1968808	0.880952	0.0027			A_30_P01033393
356	22	A_30_P01017800	A_55_P1971571	0.97619	0			A_30_P01033638
357	23	A_30_P01017800	A_55_P1978920	0.761905	0.0141
358	24	A_30_P01017800	A_55_P1987800	0.785714	0.0101
359	25	A_30_P01017800	A_55_P1988774	0.809524	0.0079
360	26	A_30_P01017800	A_55_P2003883	0.738095	0.0177
361	27	A_30_P01017800	A_55_P2012314	0.809524	0.0087
362	28	A_30_P01017800	A_55_P2014853	0.928571	0.001
363	29	A_30_P01017800	A_55_P2014854	0.714286	0.022
364	30	A_30_P01017800	A_55_P2025173	0.809524	0.0088
365	31	A_30_P01017800	A_55_P2031333	0.785714	0.011
366	32	A_30_P01017800	A_55_P2032548	0.761905	0.0129
367	33	A_30_P01017800	A_55_P2045040	0.904762	0.0013
368	34	A_30_P01017800	A_55_P2062513	0.809524	0.007
369	35	A_30_P01017800	A_55_P2075253	0.714286	0.0218
370	36	A_30_P01017800	A_55_P2083317	0.809524	0.0078
371	37	A_30_P01017800	A_55_P2089858	0.880952	0.003
372	38	A_30_P01017800	A_55_P2093749	0.880952	0.0021
373	39	A_30_P01017800	A_55_P2094044	0.761905	0.0126
374	40	A_30_P01017800	A_55_P2096973	0.785714	0.0103
375	41	A_30_P01017800	A_55_P2097333	0.928571	0.0003
376	42	A_30_P01017800	A_55_P2101957	0.833333	0.005
377	43	A_30_P01017800	A_55_P2106414	0.761905	0.0128
378	44	A_30_P01017800	A_55_P2109008	0.904762	0.0005
379	45	A_30_P01017800	A_55_P2111698	0.880952	0.0023
380	46	A_30_P01017800	A_55_P2113335	0.880952	0.0021
381	47	A_30_P01017800	A_55_P2121484	0.809524	0.0074
382	48	A_30_P01017800	A_55_P2130114	0.833333	0.0054
383	49	A_30_P01017800	A_55_P2131747	0.904762	0.0011
384	50	A_30_P01017800	A_55_P2131979	0.714286	0.0249
385	51	A_30_P01017800	A_55_P2140764	0.714286	0.0242
386	52	A_30_P01017800	A_55_P2141454	0.738095	0.0177
387	53	A_30_P01017800	A_55_P2144256	0.833333	0.0058
388	54	A_30_P01017800	A_55_P2153961	0.809524	0.0089
389	55	A_30_P01017800	A_55_P2160663	0.904762	0.001
390	56	A_30_P01017800	A_55_P2162815	0.809524	0.0059
391	57	A_30_P01017800	A_55_P2166733	0.761905	0.0125
392	58	A_30_P01017800	A_55_P2167630	0.809524	0.0085
393	59	A_30_P01017800	A_55_P2172693	0.904762	0.001
394	60	A_30_P01017800	A_55_P2201612	0.952381	0.0003
395	61	A_30_P01017800	A_55_P2267696	0.880952	0.0018
396	62	A_30_P01017800	A_55_P2287260	0.785714	0.0112
397	63	A_30_P01017800	A_55_P2294051	0.833333	0.005
398	64	A_30_P01017800	A_55_P2318016	0.738095	0.0166
399	65	A_30_P01017800	A_65_P13209	0.857143	0.0046
400	66	A_30_P01017800	A_66_P123836	0.714286	0.0222
401	67	A_30_P01017800	A_66_P140954	0.928571	0.0011
402	68	A_30_P01017800	A_52_P416327	-0.833333	0.0052
403	69	A_30_P01017800	A_52_P70854	-0.761905	0.0138
404	70	A_30_P01017800	A_52_P98614	-0.952381	0.0003
405	71	A_30_P01017800	A_55_P1972297	-0.714286	0.0222
406	72	A_30_P01017800	A_55_P2006668	-0.785714	0.0104
407	73	A_30_P01017800	A_55_P2006862	-0.857143	0.0049
408	74	A_30_P01017800	A_55_P2008016	-0.785714	0.01
409	75	A_30_P01017800	A_55_P2015530	-0.714286	0.0226
410	76	A_30_P01017800	A_55_P2019841	-0.857143	0.0034
411	77	A_30_P01017800	A_55_P2053788	-0.714286	0.0233
412	78	A_30_P01017800	A_55_P2155307	-0.738095	0.0179
413	79	A_30_P01017800	A_55_P2158011	-0.714286	0.0225
414	80	A_30_P01017800	A_55_P2179027	-0.904762	0.0008
415	81	A_30_P01017800	A_55_P2205769	-0.761905	0.0141
416	82	A_30_P01017800	A_55_P2322104	-0.714286	0.023
417	1	A_30_P01017815	A_51_P121607	0.785714	0.0121
418	2	A_30_P01017815	A_51_P137452	0.761905	0.0129
419	3	A_30_P01017815	A_51_P192203	0.904762	0.0008
420	4	A_30_P01017815	A_51_P203844	0.880952	0.0023
421	5	A_30_P01017815	A_51_P303316	0.738095	0.0186
422	6	A_30_P01017815	A_51_P391934	0.714286	0.0227
423	7	A_30_P01017815	A_51_P398833	0.761905	0.0119
424	8	A_30_P01017815	A_51_P520306	0.785714	0.0105
425	9	A_30_P01017815	A_52_P21951	0.785714	0.0106
426	10	A_30_P01017815	A_52_P517289	0.738095	0.0208
427	11	A_30_P01017815	A_55_P1967473	0.714286	0.0211
428	12	A_30_P01017815	A_55_P1984821	0.833333	0.0049
429	13	A_30_P01017815	A_55_P2021816	0.761905	0.0146
430	14	A_30_P01017815	A_55_P2031068	0.809524	0.0072
431	15	A_30_P01017815	A_55_P2050962	0.714286	0.0227
432	16	A_30_P01017815	A_55_P2057430	0.738095	0.0195
433	17	A_30_P01017815	A_55_P2060193	0.857143	0.0032
434	18	A_30_P01017815	A_55_P2075962	0.809524	0.0089
435	19	A_30_P01017815	A_55_P2081198	0.761905	0.0145
436	20	A_30_P01017815	A_55_P2084606	0.738095	0.0204
437	21	A_30_P01017815	A_55_P2088846	0.714286	0.0212
438	22	A_30_P01017815	A_55_P2096035	0.785714	0.012
439	23	A_30_P01017815	A_55_P2103992	0.880952	0.002
440	24	A_30_P01017815	A_55_P2105195	0.738095	0.0205
441	25	A_30_P01017815	A_55_P2105239	0.761905	0.017
442	26	A_30_P01017815	A_55_P2145626	0.714286	0.0231
443	27	A_30_P01017815	A_55_P2162175	0.880952	0.0016
444	28	A_30_P01017815	A_55_P2273929	0.738095	0.017
445	29	A_30_P01017815	A_55_P2305010	0.761905	0.0168
446	30	A_30_P01017815	A_55_P1963547	-0.714286	0.0238
447	31	A_30_P01017815	A_55_P2088223	-0.833333	0.0052
448	32	A_30_P01017815	A_55_P2089500	-0.738095	0.0181
449	33	A_30_P01017815	A_55_P2284119	-0.761905	0.012
450	34	A_30_P01017815	A_55_P2328082	-0.738095	0.0173
451	1	A_30_P01017854	A_51_P125056	0.904762	0.0008
452	2	A_30_P01017854	A_51_P226962	0.904762	0.0002
453	3	A_30_P01017854	A_51_P230552	0.785714	0.0091
454	4	A_30_P01017854	A_51_P278230	0.809524	0.007
455	5	A_30_P01017854	A_51_P327996	0.833333	0.0062
456	6	A_30_P01017854	A_51_P364210	0.833333	0.0054
457	7	A_30_P01017854	A_52_P168575	0.714286	0.0225
458	8	A_30_P01017854	A_52_P480859	0.833333	0.0063
459	9	A_30_P01017854	A_52_P487436	0.714286	0.0227
460	10	A_30_P01017854	A_52_P496173	0.761905	0.0139
461	11	A_30_P01017854	A_52_P517098	0.809524	0.0074
462	12	A_30_P01017854	A_52_P52910	0.714286	0.0225
463	13	A_30_P01017854	A_52_P599573	0.833333	0.0055
464	14	A_30_P01017854	A_52_P661044	0.738095	0.018
465	15	A_30_P01017854	A_52_P70796	0.809524	0.0067
466	16	A_30_P01017854	A_55_P1954856	0.97619	0
467	17	A_30_P01017854	A_55_P1969231	0.714286	0.0205
468	18	A_30_P01017854	A_55_P1970915	0.809524	0.0076
469	19	A_30_P01017854	A_55_P1971938	0.809524	0.0074
470	20	A_30_P01017854	A_55_P1976387	0.785714	0.0114
471	21	A_30_P01017854	A_55_P1979364	0.714286	0.023
472	22	A_30_P01017854	A_55_P1987800	0.785714	0.009
473	23	A_30_P01017854	A_55_P1989738	0.761905	0.0152
474	24	A_30_P01017854	A_55_P1990483	0.761905	0.0152
475	25	A_30_P01017854	A_55_P2005175	0.809524	0.0091
476	26	A_30_P01017854	A_55_P2008403	0.809524	0.0078
477	27	A_30_P01017854	A_55_P2022258	0.809524	0.0059
478	28	A_30_P01017854	A_55_P2031333	0.785714	0.0101
479	29	A_30_P01017854	A_55_P2032548	0.833333	0.0034
480	30	A_30_P01017854	A_55_P2038347	0.738095	0.0202
481	31	A_30_P01017854	A_55_P2042177	0.738095	0.0176
482	32	A_30_P01017854	A_55_P2045697	0.809524	0.0073
483	33	A_30_P01017854	A_55_P2051377	0.714286	0.0216
484	34	A_30_P01017854	A_55_P2058040	0.714286	0.0244
485	35	A_30_P01017854	A_55_P2074165	0.738095	0.0201
486	36	A_30_P01017854	A_55_P2084152	0.809524	0.0074
487	37	A_30_P01017854	A_55_P2096973	0.785714	0.0105
488	38	A_30_P01017854	A_55_P2098340	0.880952	0.0023
489	39	A_30_P01017854	A_55_P2098971	0.809524	0.0086
490	40	A_30_P01017854	A_55_P2100290	0.880952	0.0029
491	41	A_30_P01017854	A_55_P2102991	0.833333	0.0068
492	42	A_30_P01017854	A_55_P2118843	0.714286	0.0213
493	43	A_30_P01017854	A_55_P2131979	0.714286	0.0217
494	44	A_30_P01017854	A_55_P2133431	0.952381	0.0002
495	45	A_30_P01017854	A_55_P2150937	0.809524	0.0093
496	46	A_30_P01017854	A_55_P2152991	0.904762	0.0011
497	47	A_30_P01017854	A_55_P2157384	0.761905	0.0139
498	48	A_30_P01017854	A_55_P2159155	0.761905	0.0148
499	49	A_30_P01017854	A_55_P2178568	0.738095	0.0171
500	50	A_30_P01017854	A_55_P2208682	0.928571	0.0003
501	51	A_30_P01017854	A_55_P2419116	0.761905	0.0149
502	52	A_30_P01017854	A_66_P114826	0.857143	0.0028
503	53	A_30_P01017854	A_66_P130541	0.738095	0.0159
504	54	A_30_P01017854	A_66_P136569	0.785714	0.0096
505	55	A_30_P01017854	A_66_P139675	0.714286	0.0203
506	56	A_30_P01017854	A_52_P37702	-0.785714	0.0092
507	57	A_30_P01017854	A_55_P1982019	-0.880952	0.0024
508	58	A_30_P01017854	A_55_P2006668	-0.785714	0.0104
509	59	A_30_P01017854	A_55_P2044292	-0.714286	0.0246
510	60	A_30_P01017854	A_55_P2058117	-0.809524	0.0073
511	61	A_30_P01017854	A_55_P2079425	-0.833333	0.0049
512	62	A_30_P01017854	A_55_P2136526	-0.761905	0.0141
513	63	A_30_P01017854	A_55_P2201454	-0.714286	0.0231
514	64	A_30_P01017854	A_55_P2388762	-0.738095	0.0188
515	65	A_30_P01017854	A_66_P137374	-0.785714	0.0101
516	1	A_30_P01017907	A_51_P125056	0.738095	0.0193
517	2	A_30_P01017907	A_51_P126275	0.738095	0.0162
518	3	A_30_P01017907	A_51_P167597	0.761905	0.0153
519	4	A_30_P01017907	A_51_P192203	0.714286	0.0226
520	5	A_30_P01017907	A_51_P364210	0.809524	0.0082
521	6	A_30_P01017907	A_51_P391934	0.952381	0.0003
522	7	A_30_P01017907	A_51_P419103	0.785714	0.0106
523	8	A_30_P01017907	A_51_P442118	0.833333	0.0062
524	9	A_30_P01017907	A_51_P455326	0.714286	0.0225
525	10	A_30_P01017907	A_51_P459944	0.714286	0.0226
526	11	A_30_P01017907	A_51_P498442	0.785714	0.0112
527	12	A_30_P01017907	A_52_P117408	0.809524	0.0081
528	13	A_30_P01017907	A_52_P209514	0.809524	0.0088
529	14	A_30_P01017907	A_52_P356128	0.857143	0.0032
530	15	A_30_P01017907	A_52_P487436	0.761905	0.0132
531	16	A_30_P01017907	A_52_P599573	0.809524	0.0069
532	17	A_30_P01017907	A_55_P1969152	0.809524	0.0082
533	18	A_30_P01017907	A_55_P1977052	0.833333	0.0044
534	19	A_30_P01017907	A_55_P1977776	0.714286	0.0228
535	20	A_30_P01017907	A_55_P1980550	0.738095	0.0199
536	21	A_30_P01017907	A_55_P1984821	0.809524	0.0081
537	22	A_30_P01017907	A_55_P1997903	0.761905	0.0147
538	23	A_30_P01017907	A_55_P2003883	0.714286	0.0217
539	24	A_30_P01017907	A_55_P2015635	0.904762	0.0014
540	25	A_30_P01017907	A_55_P2026880	0.833333	0.005
541	26	A_30_P01017907	A_55_P2031681	0.809524	0.0088
542	27	A_30_P01017907	A_55_P2040292	0.714286	0.0207
543	28	A_30_P01017907	A_55_P2041137	0.809524	0.0056
544	29	A_30_P01017907	A_55_P2042177	0.809524	0.0087
545	30	A_30_P01017907	A_55_P2056443	0.738095	0.0196
546	31	A_30_P01017907	A_55_P2057430	0.761905	0.0144
547	32	A_30_P01017907	A_55_P2071142	0.833333	0.0051
548	33	A_30_P01017907	A_55_P2074165	0.738095	0.0185
549	34	A_30_P01017907	A_55_P2075962	0.714286	0.0225
550	35	A_30_P01017907	A_55_P2083304	0.738095	0.0184
551	36	A_30_P01017907	A_55_P2084606	0.714286	0.0217
552	37	A_30_P01017907	A_55_P2088755	0.857143	0.0026
553	38	A_30_P01017907	A_55_P2088846	0.857143	0.0042
554	39	A_30_P01017907	A_55_P2100272	0.880952	0.0017
555	40	A_30_P01017907	A_55_P2107681	0.714286	0.0248
556	41	A_30_P01017907	A_55_P2108813	0.714286	0.0218
557	42	A_30_P01017907	A_55_P2127755	0.833333	0.0055
558	43	A_30_P01017907	A_55_P2134336	0.809524	0.0073
559	44	A_30_P01017907	A_55_P2140764	0.738095	0.0175
560	45	A_30_P01017907	A_55_P2141043	0.714286	0.0208
561	46	A_30_P01017907	A_55_P2150580	0.785714	0.0108
562	47	A_30_P01017907	A_55_P2159155	0.714286	0.0226
563	48	A_30_P01017907	A_55_P2162175	0.714286	0.0241
564	49	A_30_P01017907	A_55_P2170464	0.904762	0.0015
565	50	A_30_P01017907	A_55_P2185410	0.738095	0.0206
566	51	A_30_P01017907	A_55_P2244941	0.809524	0.008
567	52	A_30_P01017907	A_55_P2247021	0.880952	0.0026
568	53	A_30_P01017907	A_55_P2340820	0.761905	0.0141
569	54	A_30_P01017907	A_55_P2419116	0.785714	0.0105
570	55	A_30_P01017907	A_55_P2421597	0.738095	0.0173
571	56	A_30_P01017907	A_66_P120970	0.714286	0.0231
572	57	A_30_P01017907	A_66_P125538	0.904762	0.0005
573	58	A_30_P01017907	A_66_P133119	0.738095	0.0177
574	59	A_30_P01017907	A_55_P1957148	-0.690476	0.0249
575	60	A_30_P01017907	A_55_P2322104	-0.738095	0.0181
576	1	A_30_P01017935	A_51_P203844	0.809524	0.0084
577	2	A_30_P01017935	A_51_P206165	0.761905	0.0126
578	3	A_30_P01017935	A_51_P278230	0.809524	0.0074
579	4	A_30_P01017935	A_51_P379698	0.833333	0.0051
580	5	A_30_P01017935	A_51_P398833	0.809524	0.0064
581	6	A_30_P01017935	A_51_P412966	0.761905	0.0147
582	7	A_30_P01017935	A_51_P455326	0.738095	0.0192
583	8	A_30_P01017935	A_51_P520306	0.952381	0.0002
584	9	A_30_P01017935	A_52_P122649	0.714286	0.0241
585	10	A_30_P01017935	A_52_P1516	0.833333	0.0048
586	11	A_30_P01017935	A_52_P21951	0.952381	0.0005
587	12	A_30_P01017935	A_52_P517289	0.880952	0.0022
588	13	A_30_P01017935	A_52_P607195	0.785714	0.0116
589	14	A_30_P01017935	A_52_P61697	0.785714	0.0103
590	15	A_30_P01017935	A_55_P1969231	0.809524	0.0075
591	16	A_30_P01017935	A_55_P1973326	0.714286	0.0245
592	17	A_30_P01017935	A_55_P1974178	0.761905	0.0152
593	18	A_30_P01017935	A_55_P1979156	0.952381	0.0002
594	19	A_30_P01017935	A_55_P1988658	0.952381	0.0004
595	20	A_30_P01017935	A_55_P2000978	0.880952	0.0026
596	21	A_30_P01017935	A_55_P2004365	0.714286	0.0228
597	22	A_30_P01017935	A_55_P2006460	0.880952	0.0022
598	23	A_30_P01017935	A_55_P2021816	0.809524	0.0075
599	24	A_30_P01017935	A_55_P2024439	0.857143	0.0034
600	25	A_30_P01017935	A_55_P2044528	0.738095	0.0198
601	26	A_30_P01017935	A_55_P2050962	0.833333	0.0045
602	27	A_30_P01017935	A_55_P2053404	0.761905	0.0143
603	28	A_30_P01017935	A_55_P2057557	0.952381	0.0003
604	29	A_30_P01017935	A_55_P2060193	0.928571	0.0006
605	30	A_30_P01017935	A_55_P2081198	0.928571	0.0007
606	31	A_30_P01017935	A_55_P2083304	0.809524	0.0062
607	32	A_30_P01017935	A_55_P2084606	0.785714	0.0102
608	33	A_30_P01017935	A_55_P2096035	0.809524	0.0069
609	34	A_30_P01017935	A_55_P2104997	0.714286	0.022
610	35	A_30_P01017935	A_55_P2105195	0.809524	0.0082
611	36	A_30_P01017935	A_55_P2111603	0.833333	0.0048
612	37	A_30_P01017935	A_55_P2124582	0.785714	0.0091
613	38	A_30_P01017935	A_55_P2125791	0.809524	0.0083
614	39	A_30_P01017935	A_55_P2146398	0.738095	0.019
615	40	A_30_P01017935	A_55_P2151421	0.738095	0.0171
616	41	A_30_P01017935	A_55_P2152292	0.761905	0.0149
617	42	A_30_P01017935	A_55_P2164492	0.880952	0.0021
618	43	A_30_P01017935	A_55_P2184023	0.857143	0.0037
619	44	A_30_P01017935	A_55_P2184209	0.785714	0.0102
620	45	A_30_P01017935	A_55_P2193487	0.857143	0.0036
621	46	A_30_P01017935	A_55_P2273929	0.785714	0.0119
622	47	A_30_P01017935	A_55_P2305010	0.714286	0.0242
623	48	A_30_P01017935	A_55_P2329660	0.785714	0.0109
624	49	A_30_P01017935	A_66_P138053	0.97619	0
625	50	A_30_P01017935	A_51_P271136	-0.714286	0.0223
626	51	A_30_P01017935	A_51_P298615	-0.738095	0.0173
627	52	A_30_P01017935	A_51_P444437	-0.857143	0.0033
628	53	A_30_P01017935	A_52_P1180358	-0.785714	0.0102
629	54	A_30_P01017935	A_52_P237077	-0.833333	0.0062
630	55	A_30_P01017935	A_52_P276955	-0.738095	0.0161
631	56	A_30_P01017935	A_52_P330359	-1	0
632	57	A_30_P01017935	A_52_P421716	-0.714286	0.0248
633	58	A_30_P01017935	A_52_P500979	-0.738095	0.0182
634	59	A_30_P01017935	A_55_P1954086	-0.833333	0.0047
635	60	A_30_P01017935	A_55_P1963547	-0.833333	0.0054
636	61	A_30_P01017935	A_55_P2000027	-0.785714	0.0105
637	62	A_30_P01017935	A_55_P2001818	-0.880952	0.002
638	63	A_30_P01017935	A_55_P2004536	-0.761905	0.0145
639	64	A_30_P01017935	A_55_P2065601	-0.833333	0.006
640	65	A_30_P01017935	A_55_P2084348	-0.904762	0.0017
641	66	A_30_P01017935	A_55_P2088223	-0.880952	0.0026
642	67	A_30_P01017935	A_55_P2089500	-0.904762	0.0013
643	68	A_30_P01017935	A_55_P2092164	-0.809524	0.0089
644	69	A_30_P01017935	A_55_P2093039	-0.809524	0.0077
645	70	A_30_P01017935	A_55_P2100809	-0.714286	0.023
646	71	A_30_P01017935	A_55_P2129281	-0.761905	0.0168
647	72	A_30_P01017935	A_55_P2130880	-0.714286	0.0209
648	73	A_30_P01017935	A_55_P2157978	-0.833333	0.0047
649	74	A_30_P01017935	A_55_P2249344	-0.714286	0.0218
650	75	A_30_P01017935	A_55_P2284119	-0.97619	0
651	76	A_30_P01017935	A_55_P2378030	-0.809524	0.008
652	1	A_30_P01017970	A_51_P117087	0.833333	0.0051
653	2	A_30_P01017970	A_51_P125056	0.833333	0.0059
654	3	A_30_P01017970	A_51_P192203	0.761905	0.0133
655	4	A_30_P01017970	A_51_P206165	0.738095	0.0184
656	5	A_30_P01017970	A_51_P364210	0.761905	0.0142
657	6	A_30_P01017970	A_51_P391934	0.904762	0.0009
658	7	A_30_P01017970	A_51_P414746	0.785714	0.0097
659	8	A_30_P01017970	A_51_P442118	0.738095	0.0183
660	9	A_30_P01017970	A_51_P459944	0.761905	0.0142
661	10	A_30_P01017970	A_52_P209514	0.857143	0.0039
662	11	A_30_P01017970	A_52_P356128	0.714286	0.0225
663	12	A_30_P01017970	A_52_P487436	0.904762	0.001
664	13	A_30_P01017970	A_52_P599573	0.761905	0.0149
665	14	A_30_P01017970	A_52_P661044	0.857143	0.0036
666	15	A_30_P01017970	A_52_P78022	0.738095	0.0203
667	16	A_30_P01017970	A_55_P1969152	0.857143	0.0038
668	17	A_30_P01017970	A_55_P1984821	0.714286	0.0225
669	18	A_30_P01017970	A_55_P1987117	0.714286	0.0246
670	19	A_30_P01017970	A_55_P1989449	0.738095	0.0195
671	20	A_30_P01017970	A_55_P2008801	0.761905	0.0153
672	21	A_30_P01017970	A_55_P2015635	0.857143	0.0048
673	22	A_30_P01017970	A_55_P2026880	0.738095	0.0196
674	23	A_30_P01017970	A_55_P2031068	0.809524	0.0064
675	24	A_30_P01017970	A_55_P2031333	0.714286	0.0213
676	25	A_30_P01017970	A_55_P2031681	0.761905	0.0118
677	26	A_30_P01017970	A_55_P2032548	0.714286	0.0228
678	27	A_30_P01017970	A_55_P2033116	0.738095	0.0188
679	28	A_30_P01017970	A_55_P2042177	0.952381	0.0002
680	29	A_30_P01017970	A_55_P2048550	0.738095	0.0189
681	30	A_30_P01017970	A_55_P2056443	0.880952	0.0022
682	31	A_30_P01017970	A_55_P2057430	0.809524	0.0083
683	32	A_30_P01017970	A_55_P2071142	0.928571	0.0005
684	33	A_30_P01017970	A_55_P2074165	0.880952	0.0024
685	34	A_30_P01017970	A_55_P2075962	0.761905	0.0154
686	35	A_30_P01017970	A_55_P2081761	0.857143	0.0027
687	36	A_30_P01017970	A_55_P2088846	0.904762	0.0018
688	37	A_30_P01017970	A_55_P2100272	0.833333	0.0052
689	38	A_30_P01017970	A_55_P2123045	0.714286	0.0221
690	39	A_30_P01017970	A_55_P2127755	0.738095	0.017
691	40	A_30_P01017970	A_55_P2141043	0.857143	0.0036
692	41	A_30_P01017970	A_55_P2159155	0.904762	0.0009
693	42	A_30_P01017970	A_55_P2162175	0.809524	0.0079
694	43	A_30_P01017970	A_55_P2170464	0.857143	0.0034
695	44	A_30_P01017970	A_55_P2172106	0.857143	0.0029
696	45	A_30_P01017970	A_55_P2174386	0.785714	0.0102
697	46	A_30_P01017970	A_55_P2185410	0.928571	0.0002
698	47	A_30_P01017970	A_55_P2243237	0.738095	0.0202
699	48	A_30_P01017970	A_55_P2244941	0.761905	0.0132
700	49	A_30_P01017970	A_55_P2247021	0.785714	0.012
701	50	A_30_P01017970	A_55_P2340820	0.857143	0.0038
702	51	A_30_P01017970	A_55_P2419116	0.928571	0.001
703	52	A_30_P01017970	A_66_P114616	0.714286	0.0248
704	53	A_30_P01017970	A_66_P120970	0.761905	0.0152
705	54	A_30_P01017970	A_66_P123836	0.785714	0.0091
706	55	A_30_P01017970	A_66_P125538	0.952381	0.0003
707	56	A_30_P01017970	A_66_P135885	0.714286	0.024
708	57	A_30_P01017970	A_52_P589568	-0.738095	0.0182
709	1	A_30_P01017995	A_51_P167876	-0.738095	0.0177
710	2	A_30_P01017995	A_51_P205334	0.738095	0.0188
711	3	A_30_P01017995	A_51_P353735	0.738095	0.0181
712	4	A_30_P01017995	A_52_P52910	0.857143	0.0034
713	5	A_30_P01017995	A_55_P1952469	0.714286	0.0209
714	6	A_30_P01017995	A_55_P1964138	0.809524	0.0075
715	7	A_30_P01017995	A_55_P1968603	0.809524	0.0064
716	8	A_30_P01017995	A_55_P1971938	0.761905	0.0154
717	9	A_30_P01017995	A_55_P2005175	0.809524	0.006
718	10	A_30_P01017995	A_55_P2008403	0.809524	0.0086
719	11	A_30_P01017995	A_55_P2025173	0.761905	0.0135
720	12	A_30_P01017995	A_55_P2040292	0.761905	0.0143
721	13	A_30_P01017995	A_55_P2083317	0.761905	0.0119
722	14	A_30_P01017995	A_55_P2131747	0.761905	0.0153
723	15	A_30_P01017995	A_55_P2131979	0.761905	0.0134
724	16	A_30_P01017995	A_55_P2141454	0.857143	0.0027
725	17	A_30_P01017995	A_55_P2144511	0.809524	0.0081
726	18	A_30_P01017995	A_55_P2150937	0.809524	0.0079
727	19	A_30_P01017995	A_55_P2160663	0.738095	0.0191
728	20	A_30_P01017995	A_55_P2166733	0.880952	0.0023
729	21	A_30_P01017995	A_66_P100496	0.738095	0.0214
730	22	A_30_P01017995	A_55_P2136526	-0.714286	0.0217
731	1	A_30_P01018024	A_51_P167597	0.785714	0.0109
732	2	A_30_P01018024	A_51_P249104	0.714286	0.0241
733	3	A_30_P01018024	A_52_P142520	0.714286	0.0207
734	4	A_30_P01018024	A_52_P229981	0.714286	0.024
735	5	A_30_P01018024	A_52_P397957	0.738095	0.0205
736	6	A_30_P01018024	A_52_P594302	0.714286	0.0218
737	7	A_30_P01018024	A_52_P628915	0.833333	0.0055
738	8	A_30_P01018024	A_52_P684087	0.833333	0.0056
739	9	A_30_P01018024	A_55_P1961180	0.880952	0.002
740	10	A_30_P01018024	A_55_P1966216	0.809524	0.0066
741	11	A_30_P01018024	A_55_P1969152	0.714286	0.0212
742	12	A_30_P01018024	A_55_P1973203	0.904762	0.0009
743	13	A_30_P01018024	A_55_P1980550	0.928571	0.0012
744	14	A_30_P01018024	A_55_P1981035	0.714286	0.0212
745	15	A_30_P01018024	A_55_P1982467	0.857143	0.0036
746	16	A_30_P01018024	A_55_P1997903	0.857143	0.004
747	17	A_30_P01018024	A_55_P1999187	0.714286	0.0215
748	18	A_30_P01018024	A_55_P2002469	0.809524	0.006
749	19	A_30_P01018024	A_55_P2004365	0.785714	0.0117
750	20	A_30_P01018024	A_55_P2042183	0.857143	0.0056
751	21	A_30_P01018024	A_55_P2044257	0.952381	0.0002
752	22	A_30_P01018024	A_55_P2072041	0.880952	0.0022
753	23	A_30_P01018024	A_55_P2087153	0.904762	0.0009
754	24	A_30_P01018024	A_55_P2088755	0.761905	0.0137
755	25	A_30_P01018024	A_55_P2089665	0.833333	0.0044
756	26	A_30_P01018024	A_55_P2104343	0.880952	0.0032
757	27	A_30_P01018024	A_55_P2107681	0.761905	0.0139
758	28	A_30_P01018024	A_55_P2108813	0.97619	0
759	29	A_30_P01018024	A_55_P2109927	0.714286	0.0208
760	30	A_30_P01018024	A_55_P2112564	0.833333	0.0058
761	31	A_30_P01018024	A_55_P2117146	0.738095	0.0187
762	32	A_30_P01018024	A_55_P2121794	0.833333	0.0048
763	33	A_30_P01018024	A_55_P2133767	0.738095	0.0183
764	34	A_30_P01018024	A_55_P2134336	0.857143	0.004
765	35	A_30_P01018024	A_55_P2135203	0.857143	0.0031
766	36	A_30_P01018024	A_55_P2148828	0.714286	0.0226
767	37	A_30_P01018024	A_55_P2164890	0.785714	0.0091
768	38	A_30_P01018024	A_55_P2175440	0.880952	0.0025
769	39	A_30_P01018024	A_55_P2176898	0.785714	0.0112
770	40	A_30_P01018024	A_55_P2182523	0.714286	0.0244
771	41	A_30_P01018024	A_55_P2184511	0.833333	0.0062
772	42	A_30_P01018024	A_55_P2431897	0.761905	0.0156
773	43	A_30_P01018024	A_66_P119812	0.880952	0.0023
774	44	A_30_P01018024	A_66_P121193	0.714286	0.0213
775	45	A_30_P01018024	A_66_P124975	0.857143	0.0045
776	46	A_30_P01018024	A_66_P129619	0.785714	0.011
777	47	A_30_P01018024	A_66_P133225	0.714286	0.0248
778	48	A_30_P01018024	A_51_P126337	-0.928571	0.0013
779	49	A_30_P01018024	A_51_P298615	-0.761905	0.0126
780	50	A_30_P01018024	A_51_P426270	-0.714286	0.0225
781	51	A_30_P01018024	A_55_P2007500	-0.738095	0.0193
782	52	A_30_P01018024	A_55_P2061333	-0.761905	0.0141
783	53	A_30_P01018024	A_55_P2088183	-0.785714	0.0108
784	54	A_30_P01018024	A_55_P2113021	-0.785714	0.0114
785	55	A_30_P01018024	A_55_P2141817	-0.833333	0.0044
786	56	A_30_P01018024	A_65_P20433	-0.761905	0.0138
787	57	A_30_P01018024	A_66_P105460	-0.714286	0.0221
788	1	A_30_P01018105	A_51_P206235	0.880952	0.0021
789	2	A_30_P01018105	A_51_P433887	0.738095	0.016
790	3	A_30_P01018105	A_51_P459944	0.809524	0.0075
791	4	A_30_P01018105	A_52_P209514	0.738095	0.0182
792	5	A_30_P01018105	A_52_P229981	0.833333	0.0053
793	6	A_30_P01018105	A_52_P551844	0.738095	0.0172
794	7	A_30_P01018105	A_52_P628915	0.880952	0.0024
795	8	A_30_P01018105	A_55_P1952469	0.809524	0.0085
796	9	A_30_P01018105	A_55_P1966254	0.857143	0.0034
797	10	A_30_P01018105	A_55_P1968603	0.714286	0.0236
798	11	A_30_P01018105	A_55_P1968683	0.904762	0.0016
799	12	A_30_P01018105	A_55_P1968808	0.738095	0.0203
800	13	A_30_P01018105	A_55_P1986401	0.952381	0
801	14	A_30_P01018105	A_55_P1997421	0.738095	0.0193
802	15	A_30_P01018105	A_55_P1997676	0.809524	0.0074
803	16	A_30_P01018105	A_55_P2031681	0.738095	0.0184
804	17	A_30_P01018105	A_55_P2052465	0.857143	0.0034
805	18	A_30_P01018105	A_55_P2063486	0.904762	0.0011
806	19	A_30_P01018105	A_55_P2067717	0.833333	0.0047
807	20	A_30_P01018105	A_55_P2090299	0.809524	0.0073
808	21	A_30_P01018105	A_55_P2095558	0.952381	0.0002
809	22	A_30_P01018105	A_55_P2106414	0.714286	0.0223
810	23	A_30_P01018105	A_55_P2107681	0.880952	0.0021
811	24	A_30_P01018105	A_55_P2109008	0.714286	0.0225
812	25	A_30_P01018105	A_55_P2110210	0.880952	0.0024
813	26	A_30_P01018105	A_55_P2113335	0.738095	0.019
814	27	A_30_P01018105	A_55_P2117475	0.738095	0.0182
815	28	A_30_P01018105	A_55_P2127755	0.761905	0.013
816	29	A_30_P01018105	A_55_P2137073	0.809524	0.0082
817	30	A_30_P01018105	A_55_P2143085	0.952381	0.0002
818	31	A_30_P01018105	A_55_P2143296	0.928571	0.0005
819	32	A_30_P01018105	A_55_P2164932	0.761905	0.0139
820	33	A_30_P01018105	A_55_P2184511	0.785714	0.0116
821	34	A_30_P01018105	A_55_P2294051	0.738095	0.0164
822	35	A_30_P01018105	A_55_P2472184	0.928571	0.0007
823	36	A_30_P01018105	A_66_P136032	0.714286	0.0232
824	37	A_30_P01018105	A_51_P263953	-0.952381	0.0002
825	38	A_30_P01018105	A_55_P2113021	-0.880952	0.0022
826	39	A_30_P01018105	A_55_P2164608	-0.904762	0.001
827	40	A_30_P01018105	A_55_P2252876	-0.857143	0.0043
828	1	A_30_P01018126	A_51_P125056	0.761905	0.0146
829	2	A_30_P01018126	A_51_P167597	0.97619	0
830	3	A_30_P01018126	A_51_P364210	0.833333	0.0066
831	4	A_30_P01018126	A_51_P391934	0.738095	0.0165
832	5	A_30_P01018126	A_51_P419103	0.761905	0.0133
833	6	A_30_P01018126	A_51_P459944	0.785714	0.0107
834	7	A_30_P01018126	A_52_P117408	0.880952	0.0025
835	8	A_30_P01018126	A_52_P209514	0.761905	0.0136
836	9	A_30_P01018126	A_52_P356128	0.809524	0.0084
837	10	A_30_P01018126	A_52_P487436	0.809524	0.0077
838	11	A_30_P01018126	A_52_P551844	0.857143	0.0034
839	12	A_30_P01018126	A_52_P599573	0.880952	0.0019
840	13	A_30_P01018126	A_55_P1966216	0.738095	0.0181
841	14	A_30_P01018126	A_55_P1969152	0.857143	0.0043
842	15	A_30_P01018126	A_55_P1969949	0.761905	0.0128
843	16	A_30_P01018126	A_55_P1977052	0.857143	0.0042
844	17	A_30_P01018126	A_55_P1980550	0.809524	0.0079
845	18	A_30_P01018126	A_55_P1994688	0.761905	0.0133
846	19	A_30_P01018126	A_55_P1997903	0.785714	0.0091
847	20	A_30_P01018126	A_55_P2003883	0.714286	0.0248
848	21	A_30_P01018126	A_55_P2026880	0.833333	0.0044
849	22	A_30_P01018126	A_55_P2031333	0.833333	0.0048
850	23	A_30_P01018126	A_55_P2034385	0.714286	0.0234
851	24	A_30_P01018126	A_55_P2041137	0.714286	0.0217
852	25	A_30_P01018126	A_55_P2063486	0.785714	0.0118
853	26	A_30_P01018126	A_55_P2071142	0.738095	0.017
854	27	A_30_P01018126	A_55_P2072041	0.738095	0.014
855	28	A_30_P01018126	A_55_P2074165	0.738095	0.0152
856	29	A_30_P01018126	A_55_P2088755	0.833333	0.006
857	30	A_30_P01018126	A_55_P2093749	0.714286	0.0184
858	31	A_30_P01018126	A_55_P2094044	0.714286	0.0208
859	32	A_30_P01018126	A_55_P2097333	0.738095	0.0188
860	33	A_30_P01018126	A_55_P2100272	0.714286	0.0225
861	34	A_30_P01018126	A_55_P2105452	0.738095	0.0181
862	35	A_30_P01018126	A_55_P2107681	0.857143	0.0031
863	36	A_30_P01018126	A_55_P2108813	0.833333	0.0051
864	37	A_30_P01018126	A_55_P2113335	0.785714	0.0092
865	38	A_30_P01018126	A_55_P2121794	0.714286	0.0244
866	39	A_30_P01018126	A_55_P2127755	0.928571	0.0007
867	40	A_30_P01018126	A_55_P2134336	0.857143	0.0037
868	41	A_30_P01018126	A_55_P2141043	0.785714	0.0116
869	42	A_30_P01018126	A_55_P2143296	0.761905	0.0159
870	43	A_30_P01018126	A_55_P2157384	0.761905	0.0143
871	44	A_30_P01018126	A_55_P2162815	0.761905	0.013
872	45	A_30_P01018126	A_55_P2170464	0.761905	0.0145
873	46	A_30_P01018126	A_55_P2172693	0.738095	0.0192
874	47	A_30_P01018126	A_55_P2174386	0.857143	0.0028
875	48	A_30_P01018126	A_55_P2175440	0.738095	0.0212
876	49	A_30_P01018126	A_55_P2184511	0.761905	0.0131
877	50	A_30_P01018126	A_55_P2201612	0.714286	0.0238
878	51	A_30_P01018126	A_55_P2244941	0.809524	0.0067
879	52	A_30_P01018126	A_55_P2247021	0.714286	0.0223
880	53	A_30_P01018126	A_55_P2294051	0.857143	0.0032
881	54	A_30_P01018126	A_55_P2340820	0.738095	0.0169
882	55	A_30_P01018126	A_55_P2421597	0.785714	0.0105
883	56	A_30_P01018126	A_66_P125538	0.761905	0.0138
884	57	A_30_P01018126	A_52_P172014	-0.761905	0.0137
885	58	A_30_P01018126	A_55_P1957148	-0.738095	0.0198
886	59	A_30_P01018126	A_55_P2088183	-0.738095	0.0192
887	60	A_30_P01018126	A_55_P2141817	-0.714286	0.0226
888	1	A_30_P01018275	A_51_P205334	0.833333	0.006
889	2	A_30_P01018275	A_51_P459944	0.833333	0.0057
890	3	A_30_P01018275	A_52_P1004616	0.714286	0.0231
891	4	A_30_P01018275	A_52_P24439	0.714286	0.0214
892	5	A_30_P01018275	A_52_P551844	0.809524	0.0084
893	6	A_30_P01018275	A_55_P1952469	0.785714	0.0116
894	7	A_30_P01018275	A_55_P1968603	0.833333	0.0061
895	8	A_30_P01018275	A_55_P1968683	0.833333	0.0059
896	9	A_30_P01018275	A_55_P1997676	0.880952	0.0017
897	10	A_30_P01018275	A_55_P2005175	0.857143	0.0031
898	11	A_30_P01018275	A_55_P2008403	0.761905	0.0136
899	12	A_30_P01018275	A_55_P2014853	0.714286	0.0227
900	13	A_30_P01018275	A_55_P2025173	0.738095	0.0182
901	14	A_30_P01018275	A_55_P2031333	0.761905	0.0124
902	15	A_30_P01018275	A_55_P2052465	0.833333	0.0058
903	16	A_30_P01018275	A_55_P2063486	0.738095	0.019
904	17	A_30_P01018275	A_55_P2083317	0.738095	0.0197
905	18	A_30_P01018275	A_55_P2095558	0.857143	0.0046
906	19	A_30_P01018275	A_55_P2107681	0.761905	0.0122
907	20	A_30_P01018275	A_55_P2113335	0.761905	0.0149
908	21	A_30_P01018275	A_55_P2131747	0.738095	0.0184
909	22	A_30_P01018275	A_55_P2131979	0.738095	0.0196
910	23	A_30_P01018275	A_55_P2143085	0.738095	0.0179
911	24	A_30_P01018275	A_55_P2143296	0.809524	0.0078
912	25	A_30_P01018275	A_55_P2150937	0.761905	0.0139
913	26	A_30_P01018275	A_55_P2160663	0.714286	0.0222
914	27	A_30_P01018275	A_55_P2166733	0.857143	0.0022
915	28	A_30_P01018275	A_55_P2294051	0.809524	0.0069
916	29	A_30_P01018275	A_55_P2472184	0.833333	0.0046
917	30	A_30_P01018275	A_66_P140954	0.714286	0.023
918	1	A_30_P01018283	A_51_P378336	0.714286	0.0222
919	2	A_30_P01018283	A_51_P386270	-0.714286	0.0248
920	3	A_30_P01018283	A_51_P398833	0.761905	0.0135
921	4	A_30_P01018283	A_51_P455326	0.714286	0.024
922	5	A_30_P01018283	A_52_P112591	-0.809524	0.0077
923	6	A_30_P01018283	A_52_P121015	0.880952	0.0025
924	7	A_30_P01018283	A_52_P142520	0.904762	0.0008
925	8	A_30_P01018283	A_52_P210909	0.714286	0.0235
926	9	A_30_P01018283	A_52_P21951	0.738095	0.0199
927	10	A_30_P01018283	A_52_P404942	-0.761905	0.0142
928	11	A_30_P01018283	A_52_P517289	0.714286	0.0217
929	12	A_30_P01018283	A_55_P1973326	0.904762	0.001
930	13	A_30_P01018283	A_55_P1979156	0.738095	0.0194
931	14	A_30_P01018283	A_55_P1999187	0.857143	0.0028
932	15	A_30_P01018283	A_55_P2000978	0.714286	0.022
933	16	A_30_P01018283	A_55_P2004365	0.809524	0.0093
934	17	A_30_P01018283	A_55_P2021699	0.880952	0.0027
935	18	A_30_P01018283	A_55_P2060193	0.714286	0.0234
936	19	A_30_P01018283	A_55_P2112564	0.738095	0.0211
937	20	A_30_P01018283	A_55_P2125791	0.880952	0.0026
938	21	A_30_P01018283	A_55_P2148828	0.809524	0.0092
939	22	A_30_P01018283	A_55_P2182523	0.904762	0.001
940	23	A_30_P01018283	A_55_P2207110	0.714286	0.0217
941	24	A_30_P01018283	A_55_P2273929	0.857143	0.0027
942	25	A_30_P01018283	A_55_P2330173	0.738095	0.0188
943	26	A_30_P01018283	A_66_P121193	0.738095	0.018
944	27	A_30_P01018283	A_66_P138053	0.809524	0.0068
945	28	A_30_P01018283	A_51_P150653	-0.738095	0.0168
946	29	A_30_P01018283	A_51_P298615	-0.761905	0.0126
947	30	A_30_P01018283	A_51_P426270	-0.857143	0.0038
948	31	A_30_P01018283	A_52_P276955	-0.880952	0.0018
949	32	A_30_P01018283	A_52_P330359	-0.785714	0.0112
950	33	A_30_P01018283	A_55_P2004536	-0.97619	0
951	34	A_30_P01018283	A_55_P2015530	0.714286	0.0207
952	35	A_30_P01018283	A_55_P2044932	-0.714286	0.0212
953	36	A_30_P01018283	A_55_P2065601	-0.714286	0.023
954	37	A_30_P01018283	A_55_P2088223	-0.809524	0.0075
955	38	A_30_P01018283	A_55_P2089500	-0.857143	0.0036
956	39	A_30_P01018283	A_55_P2092164	-0.97619	0
957	40	A_30_P01018283	A_55_P2134236	0.761905	0.0141
958	41	A_30_P01018283	A_55_P2160181	0.738095	0.0151
959	42	A_30_P01018283	A_55_P2284119	-0.833333	0.0046
960	1	A_30_P01018536	A_51_P126275	0.833333	0.0055
961	2	A_30_P01018536	A_51_P193189	0.738095	0.0194
962	3	A_30_P01018536	A_51_P257841	0.714286	0.0245
963	4	A_30_P01018536	A_51_P324473	0.714286	0.0242
964	5	A_30_P01018536	A_51_P348217	0.809524	0.0077
965	6	A_30_P01018536	A_51_P353735	0.761905	0.011
966	7	A_30_P01018536	A_51_P442118	0.714286	0.0212
967	8	A_30_P01018536	A_52_P117408	0.761905	0.0128
968	9	A_30_P01018536	A_52_P356128	0.738095	0.0195
969	10	A_30_P01018536	A_52_P551844	0.714286	0.0228
970	11	A_30_P01018536	A_52_P612251	0.904762	0.0012
971	12	A_30_P01018536	A_55_P1952469	0.833333	0.0054
972	13	A_30_P01018536	A_55_P1959122	0.833333	0.0041
973	14	A_30_P01018536	A_55_P1966254	0.738095	0.0164
974	15	A_30_P01018536	A_55_P1968808	0.833333	0.006
975	16	A_30_P01018536	A_55_P1971571	0.761905	0.0138
976	17	A_30_P01018536	A_55_P1977052	0.761905	0.0145
977	18	A_30_P01018536	A_55_P1984821	0.738095	0.0185
978	19	A_30_P01018536	A_55_P1985628	0.833333	0.0056
979	20	A_30_P01018536	A_55_P1986183	0.761905	0.0125
980	21	A_30_P01018536	A_55_P1989449	0.785714	0.0106
981	22	A_30_P01018536	A_55_P1990032	0.714286	0.0229
982	23	A_30_P01018536	A_55_P2003883	0.761905	0.0132
983	24	A_30_P01018536	A_55_P2008403	0.714286	0.0213
984	25	A_30_P01018536	A_55_P2008644	0.785714	0.0103
985	26	A_30_P01018536	A_55_P2012314	0.833333	0.0057
986	27	A_30_P01018536	A_55_P2015635	0.833333	0.0043
987	28	A_30_P01018536	A_55_P2017377	0.714286	0.0244
988	29	A_30_P01018536	A_55_P2017465	0.904762	0.0006
989	30	A_30_P01018536	A_55_P2025443	0.761905	0.0155
990	31	A_30_P01018536	A_55_P2031681	0.833333	0.0049
991	32	A_30_P01018536	A_55_P2040292	0.785714	0.0101
992	33	A_30_P01018536	A_55_P2062513	0.833333	0.005
993	34	A_30_P01018536	A_55_P2069891	0.833333	0.0035
994	35	A_30_P01018536	A_55_P2075253	0.833333	0.0051
995	36	A_30_P01018536	A_55_P2088755	0.904762	0.0007
996	37	A_30_P01018536	A_55_P2088846	0.738095	0.0182
997	38	A_30_P01018536	A_55_P2089665	0.714286	0.023
998	39	A_30_P01018536	A_55_P2089858	0.809524	0.0059
999	40	A_30_P01018536	A_55_P2091616	0.761905	0.0147
1000	41	A_30_P01018536	A_55_P2093749	0.785714	0.0097
1001	42	A_30_P01018536	A_55_P2094044	0.738095	0.0182
1002	43	A_30_P01018536	A_55_P2097333	0.785714	0.0099
1003	44	A_30_P01018536	A_55_P2100272	0.761905	0.0173
1004	45	A_30_P01018536	A_55_P2101957	0.761905	0.0124
1005	46	A_30_P01018536	A_55_P2109008	0.809524	0.0057
1006	47	A_30_P01018536	A_55_P2111698	0.857143	0.0033
1007	48	A_30_P01018536	A_55_P2113335	0.857143	0.0039
1008	49	A_30_P01018536	A_55_P2121484	0.904762	0.0012
1009	50	A_30_P01018536	A_55_P2123045	0.738095	0.0177
1010	51	A_30_P01018536	A_55_P2127755	0.785714	0.0105
1011	52	A_30_P01018536	A_55_P2130114	0.785714	0.0109
1012	53	A_30_P01018536	A_55_P2139668	0.714286	0.0242
1013	54	A_30_P01018536	A_55_P2140764	0.904762	0.0007
1014	55	A_30_P01018536	A_55_P2144256	0.761905	0.0141
1015	56	A_30_P01018536	A_55_P2150580	0.833333	0.0056
1016	57	A_30_P01018536	A_55_P2150937	0.714286	0.0225
1017	58	A_30_P01018536	A_55_P2160663	0.833333	0.0047
1018	59	A_30_P01018536	A_55_P2162815	0.785714	0.0104
1019	60	A_30_P01018536	A_55_P2172693	0.809524	0.0075
1020	61	A_30_P01018536	A_55_P2201612	0.761905	0.0152
1021	62	A_30_P01018536	A_55_P2202598	0.738095	0.0193
1022	63	A_30_P01018536	A_55_P2244941	0.761905	0.0138
1023	64	A_30_P01018536	A_55_P2247021	0.880952	0.0022
1024	65	A_30_P01018536	A_55_P2267696	0.857143	0.0035
1025	66	A_30_P01018536	A_55_P2361731	0.761905	0.0131
1026	67	A_30_P01018536	A_66_P133119	0.809524	0.0076
1027	68	A_30_P01018536	A_51_P363214	-0.833333	0.0043
1028	69	A_30_P01018536	A_52_P284958	-0.714286	0.0214
1029	70	A_30_P01018536	A_52_P53019	-0.714286	0.0221
1030	71	A_30_P01018536	A_52_P70854	-0.880952	0.0021
1031	72	A_30_P01018536	A_52_P98614	-0.785714	0.0107
1032	73	A_30_P01018536	A_55_P2008214	-0.714286	0.0217
1033	74	A_30_P01018536	A_55_P2019841	-0.928571	0.0006
1034	75	A_30_P01018536	A_55_P2053788	-0.904762	0.0019
1035	76	A_30_P01018536	A_55_P2158011	-0.785714	0.0112
1036	77	A_30_P01018536	A_55_P2178991	-0.738095	0.0177
1037	78	A_30_P01018536	A_55_P2179027	-0.833333	0.005
1038	79	A_30_P01018536	A_55_P2322104	-0.904762	0.0009
1039	1	A_30_P01018545	A_51_P226962	0.785714	0.0101
1040	2	A_30_P01018545	A_51_P230552	0.785714	0.0115
1041	3	A_30_P01018545	A_51_P237585	-0.714286	0.0222
1042	4	A_30_P01018545	A_51_P288295	0.833333	0.0067
1043	5	A_30_P01018545	A_51_P391955	0.785714	0.011
1044	6	A_30_P01018545	A_51_P405638	0.857143	0.0031
1045	7	A_30_P01018545	A_51_P412966	0.833333	0.0059
1046	8	A_30_P01018545	A_51_P442964	0.904762	0.0011
1047	9	A_30_P01018545	A_52_P168575	0.904762	0.0013
1048	10	A_30_P01018545	A_52_P30641	0.97619	0.0001
1049	11	A_30_P01018545	A_52_P517098	0.833333	0.0066
1050	12	A_30_P01018545	A_52_P70796	0.904762	0.0005
1051	13	A_30_P01018545	A_52_P78022	0.761905	0.0141
1052	14	A_30_P01018545	A_55_P1957866	0.785714	0.0085
1053	15	A_30_P01018545	A_55_P1974178	0.809524	0.0073
1054	16	A_30_P01018545	A_55_P1977451	0.904762	0.0013
1055	17	A_30_P01018545	A_55_P1979364	0.833333	0.0044
1056	18	A_30_P01018545	A_55_P1987406	0.833333	0.0047
1057	19	A_30_P01018545	A_55_P1989738	0.880952	0.003
1058	20	A_30_P01018545	A_55_P2001583	-0.809524	0.0073
1059	21	A_30_P01018545	A_55_P2022258	0.880952	0.0025
1060	22	A_30_P01018545	A_55_P2045697	0.714286	0.0206
1061	23	A_30_P01018545	A_55_P2051377	0.857143	0.0039
1062	24	A_30_P01018545	A_55_P2053404	0.833333	0.0056
1063	25	A_30_P01018545	A_55_P2056443	0.761905	0.0134
1064	26	A_30_P01018545	A_55_P2058023	0.857143	0.0054
1065	27	A_30_P01018545	A_55_P2058040	0.833333	0.006
1066	28	A_30_P01018545	A_55_P2062021	-0.738095	0.0182
1067	29	A_30_P01018545	A_55_P2081761	0.809524	0.0081
1068	30	A_30_P01018545	A_55_P2098340	0.857143	0.0044
1069	31	A_30_P01018545	A_55_P2098971	0.738095	0.0182
1070	32	A_30_P01018545	A_55_P2100290	0.714286	0.0227
1071	33	A_30_P01018545	A_55_P2118552	0.833333	0.0049
1072	34	A_30_P01018545	A_55_P2121985	-0.714286	0.0246
1073	35	A_30_P01018545	A_55_P2124582	0.785714	0.0102
1074	36	A_30_P01018545	A_55_P2147547	0.833333	0.0058
1075	37	A_30_P01018545	A_55_P2178568	0.809524	0.0079
1076	38	A_30_P01018545	A_55_P2181796	0.714286	0.0212
1077	39	A_30_P01018545	A_55_P2187030	0.785714	0.0109
1078	40	A_30_P01018545	A_55_P2200870	-0.714286	0.0218
1079	41	A_30_P01018545	A_55_P2214124	0.714286	0.0229
1080	42	A_30_P01018545	A_55_P2329660	0.761905	0.0148
1081	43	A_30_P01018545	A_55_P2367878	-0.738095	0.0161
1082	44	A_30_P01018545	A_66_P114826	0.761905	0.0151
1083	45	A_30_P01018545	A_66_P130541	0.809524	0.0078
1084	46	A_30_P01018545	A_66_P136569	0.785714	0.011
1085	47	A_30_P01018545	A_66_P139675	0.904762	0.0011
1086	48	A_30_P01018545	A_51_P404139	0.714286	0.0214
1087	49	A_30_P01018545	A_52_P237077	-0.785714	0.0107
1088	50	A_30_P01018545	A_52_P462657	0.880952	0.002
1089	51	A_30_P01018545	A_55_P2028832	0.714286	0.0242
1090	52	A_30_P01018545	A_55_P2067620	0.904762	0.0009
1091	53	A_30_P01018545	A_55_P2105963	0.880952	0.002
1092	54	A_30_P01018545	A_55_P2135526	0.857143	0.0039
1093	55	A_30_P01018545	A_55_P2164348	-0.857143	0.0044
1094	56	A_30_P01018545	A_66_P136354	0.857143	0.0032
1095	57	A_30_P01018545	A_66_P137374	-0.809524	0.0077
1096	1	A_30_P01018712	A_51_P206165	0.761905	0.0137
1097	2	A_30_P01018712	A_51_P226962	0.738095	0.0176
1098	3	A_30_P01018712	A_51_P230552	0.738095	0.0162
1099	4	A_30_P01018712	A_51_P278230	0.714286	0.0203
1100	5	A_30_P01018712	A_51_P327996	0.738095	0.021
1101	6	A_30_P01018712	A_51_P379698	0.809524	0.0074
1102	7	A_30_P01018712	A_51_P405638	0.761905	0.0141
1103	8	A_30_P01018712	A_51_P412966	0.761905	0.0156
1104	9	A_30_P01018712	A_51_P433887	0.785714	0.0107
1105	10	A_30_P01018712	A_51_P442964	0.833333	0.0055
1106	11	A_30_P01018712	A_52_P1516	0.809524	0.009
1107	12	A_30_P01018712	A_52_P517098	0.761905	0.0139
1108	13	A_30_P01018712	A_52_P607195	0.833333	0.0061
1109	14	A_30_P01018712	A_52_P61697	0.904762	0.0008
1110	15	A_30_P01018712	A_52_P70796	0.833333	0.006
1111	16	A_30_P01018712	A_55_P1957866	0.928571	0.0004
1112	17	A_30_P01018712	A_55_P1967473	0.738095	0.0181
1113	18	A_30_P01018712	A_55_P1969231	0.904762	0.0007
1114	19	A_30_P01018712	A_55_P1970915	0.714286	0.022
1115	20	A_30_P01018712	A_55_P1974178	0.738095	0.0186
1116	21	A_30_P01018712	A_55_P1988658	0.833333	0.0051
1117	22	A_30_P01018712	A_55_P1990483	0.809524	0.0081
1118	23	A_30_P01018712	A_55_P2000978	0.714286	0.0223
1119	24	A_30_P01018712	A_55_P2006460	0.785714	0.0097
1120	25	A_30_P01018712	A_55_P2021816	0.738095	0.0181
1121	26	A_30_P01018712	A_55_P2022258	0.714286	0.024
1122	27	A_30_P01018712	A_55_P2046074	0.833333	0.0045
1123	28	A_30_P01018712	A_55_P2050962	0.833333	0.006
1124	29	A_30_P01018712	A_55_P2051377	0.857143	0.0036
1125	30	A_30_P01018712	A_55_P2053404	0.761905	0.0113
1126	31	A_30_P01018712	A_55_P2057557	0.833333	0.0044
1127	32	A_30_P01018712	A_55_P2063486	0.738095	0.0173
1128	33	A_30_P01018712	A_55_P2081198	0.761905	0.0154
1129	34	A_30_P01018712	A_55_P2083304	0.809524	0.0088
1130	35	A_30_P01018712	A_55_P2084152	0.809524	0.0076
1131	36	A_30_P01018712	A_55_P2084606	0.714286	0.022
1132	37	A_30_P01018712	A_55_P2098340	0.761905	0.0155
1133	38	A_30_P01018712	A_55_P2100290	0.809524	0.0079
1134	39	A_30_P01018712	A_55_P2102991	0.857143	0.0029
1135	40	A_30_P01018712	A_55_P2104997	1	0
1136	41	A_30_P01018712	A_55_P2105195	0.880952	0.0028
1137	42	A_30_P01018712	A_55_P2111603	0.809524	0.0082
1138	43	A_30_P01018712	A_55_P2124582	0.785714	0.0099
1139	44	A_30_P01018712	A_55_P2137073	0.857143	0.0035
1140	45	A_30_P01018712	A_55_P2143085	0.738095	0.02
1141	46	A_30_P01018712	A_55_P2147547	0.761905	0.0139
1142	47	A_30_P01018712	A_55_P2152292	0.928571	0.0005
1143	48	A_30_P01018712	A_55_P2157384	0.738095	0.0197
1144	49	A_30_P01018712	A_55_P2164492	0.761905	0.0127
1145	50	A_30_P01018712	A_55_P2164932	0.785714	0.0119
1146	51	A_30_P01018712	A_55_P2178568	0.952381	0.0001
1147	52	A_30_P01018712	A_55_P2184023	0.833333	0.0055
1148	53	A_30_P01018712	A_55_P2184209	0.738095	0.0194
1149	54	A_30_P01018712	A_55_P2193487	0.952381	0.0002
1150	55	A_30_P01018712	A_55_P2329660	0.904762	0.0011
1151	56	A_30_P01018712	A_55_P2421222	0.738095	0.0179
1152	57	A_30_P01018712	A_66_P130541	0.952381	0.0002
1153	58	A_30_P01018712	A_66_P136569	0.738095	0.0166
1154	59	A_30_P01018712	A_51_P271136	-0.904762	0.0012
1155	60	A_30_P01018712	A_51_P444437	-0.785714	0.0104
1156	61	A_30_P01018712	A_52_P237077	-0.857143	0.0042
1157	62	A_30_P01018712	A_52_P330359	-0.714286	0.0242
1158	63	A_30_P01018712	A_55_P1954086	-0.809524	0.0083
1159	64	A_30_P01018712	A_55_P1963547	-0.714286	0.0219
1160	65	A_30_P01018712	A_55_P2001818	-0.833333	0.0058
1161	66	A_30_P01018712	A_55_P2079425	-0.833333	0.0056
1162	67	A_30_P01018712	A_55_P2084348	-0.809524	0.0074
1163	68	A_30_P01018712	A_55_P2093039	-0.738095	0.0196
1164	69	A_30_P01018712	A_55_P2100809	-0.761905	0.0134
1165	70	A_30_P01018712	A_55_P2126590	-0.833333	0.0046
1166	71	A_30_P01018712	A_55_P2129281	-0.928571	0.001
1167	72	A_30_P01018712	A_55_P2132128	-0.785714	0.0112
1168	73	A_30_P01018712	A_55_P2149450	-0.714286	0.0231
1169	74	A_30_P01018712	A_55_P2157978	-0.785714	0.0104
1170	75	A_30_P01018712	A_55_P2164348	-0.785714	0.0114
1171	76	A_30_P01018712	A_55_P2164608	-0.738095	0.0173
1172	77	A_30_P01018712	A_66_P132491	-0.857143	0.0029
1173	1	A_30_P01018774	A_51_P193189	0.738095	0.0166
1174	2	A_30_P01018774	A_51_P257841	0.880952	0.0015
1175	3	A_30_P01018774	A_51_P266733	0.833333	0.0048
1176	4	A_30_P01018774	A_51_P288541	0.809524	0.0077
1177	5	A_30_P01018774	A_51_P303316	-0.761905	0.0145
1178	6	A_30_P01018774	A_51_P324473	0.833333	0.0049
1179	7	A_30_P01018774	A_51_P379698	-0.785714	0.01
1180	8	A_30_P01018774	A_51_P412966	-0.785714	0.0101
1181	9	A_30_P01018774	A_52_P1516	-0.833333	0.0056
1182	10	A_30_P01018774	A_52_P24439	0.785714	0.0098
1183	11	A_30_P01018774	A_55_P1974178	-0.880952	0.0021
1184	12	A_30_P01018774	A_55_P1985628	0.761905	0.0126
1185	13	A_30_P01018774	A_55_P1986183	0.833333	0.005
1186	14	A_30_P01018774	A_55_P1987406	-0.928571	0.0005
1187	15	A_30_P01018774	A_55_P1988658	-0.714286	0.0208
1188	16	A_30_P01018774	A_55_P1988774	0.880952	0.0022
1189	17	A_30_P01018774	A_55_P2001583	0.857143	0.0043
1190	18	A_30_P01018774	A_55_P2003004	0.714286	0.0232
1191	19	A_30_P01018774	A_55_P2012314	0.880952	0.0026
1192	20	A_30_P01018774	A_55_P2014854	0.857143	0.0032
1193	21	A_30_P01018774	A_55_P2024439	-0.833333	0.0049
1194	22	A_30_P01018774	A_55_P2025328	0.904762	0.0015
1195	23	A_30_P01018774	A_55_P2025443	0.833333	0.0061
1196	24	A_30_P01018774	A_55_P2053404	-0.785714	0.0095
1197	25	A_30_P01018774	A_55_P2057557	-0.714286	0.0213
1198	26	A_30_P01018774	A_55_P2062021	0.857143	0.0043
1199	27	A_30_P01018774	A_55_P2062513	0.880952	0.0027
1200	28	A_30_P01018774	A_55_P2062612	0.785714	0.0113
1201	29	A_30_P01018774	A_55_P2069891	0.714286	0.0216
1202	30	A_30_P01018774	A_55_P2091616	0.833333	0.006
1203	31	A_30_P01018774	A_55_P2093749	0.809524	0.0069
1204	32	A_30_P01018774	A_55_P2094044	0.833333	0.006
1205	33	A_30_P01018774	A_55_P2096035	-0.880952	0.0022
1206	34	A_30_P01018774	A_55_P2101957	0.904762	0.0014
1207	35	A_30_P01018774	A_55_P2111322	-0.952381	0.0003
1208	36	A_30_P01018774	A_55_P2111603	-0.833333	0.0057
1209	37	A_30_P01018774	A_55_P2111698	0.738095	0.0179
1210	38	A_30_P01018774	A_55_P2124582	-0.857143	0.0033
1211	39	A_30_P01018774	A_55_P2130114	0.761905	0.0139
1212	40	A_30_P01018774	A_55_P2131747	0.833333	0.0057
1213	41	A_30_P01018774	A_55_P2144256	0.904762	0.0013
1214	42	A_30_P01018774	A_55_P2153961	0.952381	0.0002
1215	43	A_30_P01018774	A_55_P2160663	0.761905	0.0135
1216	44	A_30_P01018774	A_55_P2162815	0.738095	0.0191
1217	45	A_30_P01018774	A_55_P2164492	-0.857143	0.0037
1218	46	A_30_P01018774	A_55_P2172693	0.761905	0.0124
1219	47	A_30_P01018774	A_55_P2201612	0.738095	0.0199
1220	48	A_30_P01018774	A_55_P2202598	0.714286	0.0201
1221	49	A_30_P01018774	A_55_P2250391	0.952381	0.0003
1222	50	A_30_P01018774	A_55_P2267696	0.738095	0.0171
1223	51	A_30_P01018774	A_55_P2287260	0.928571	0.0009
1224	52	A_30_P01018774	A_55_P2329660	-0.714286	0.0213
1225	53	A_30_P01018774	A_55_P2361731	0.833333	0.0051
1226	54	A_30_P01018774	A_51_P351970	-0.833333	0.0048
1227	55	A_30_P01018774	A_51_P444437	0.738095	0.0188
1228	56	A_30_P01018774	A_52_P1180358	0.809524	0.0088
1229	57	A_30_P01018774	A_52_P237077	0.714286	0.0223
1230	58	A_30_P01018774	A_52_P416327	-0.97619	0
1231	59	A_30_P01018774	A_52_P53019	-0.809524	0.0069
1232	60	A_30_P01018774	A_52_P98614	-0.809524	0.0067
1233	61	A_30_P01018774	A_55_P1954086	0.833333	0.0042
1234	62	A_30_P01018774	A_55_P1962851	-0.904762	0.0017
1235	63	A_30_P01018774	A_55_P1963547	0.904762	0.0014
1236	64	A_30_P01018774	A_55_P1972297	-0.857143	0.0034
1237	65	A_30_P01018774	A_55_P2008016	-1	0
1238	66	A_30_P01018774	A_55_P2020612	-0.857143	0.004
1239	67	A_30_P01018774	A_55_P2028832	-0.714286	0.0181
1240	68	A_30_P01018774	A_55_P2057528	-0.904762	0.0013
1241	69	A_30_P01018774	A_55_P2065601	0.714286	0.0244
1242	70	A_30_P01018774	A_55_P2067620	-0.714286	0.0237
1243	71	A_30_P01018774	A_55_P2084348	0.833333	0.0058
1244	72	A_30_P01018774	A_55_P2110584	-0.714286	0.0221
1245	73	A_30_P01018774	A_55_P2131300	0.738095	0.0157
1246	74	A_30_P01018774	A_55_P2158011	-0.857143	0.0027
1247	75	A_30_P01018774	A_55_P2164348	0.714286	0.0223
1248	76	A_30_P01018774	A_55_P2179027	-0.833333	0.0039
1249	77	A_30_P01018774	A_55_P2205769	-0.97619	0
1250	78	A_30_P01018774	A_55_P2249344	0.714286	0.0234
1251	1	A_30_P01018855	A_51_P206235	0.904762	0.0012
1252	2	A_30_P01018855	A_51_P433887	0.761905	0.0164
1253	3	A_30_P01018855	A_51_P459944	0.714286	0.022
1254	4	A_30_P01018855	A_52_P229981	0.880952	0.0024
1255	5	A_30_P01018855	A_52_P628915	0.761905	0.0144
1256	6	A_30_P01018855	A_55_P1966254	0.785714	0.0102
1257	7	A_30_P01018855	A_55_P1968683	0.857143	0.0034
1258	8	A_30_P01018855	A_55_P1986401	0.904762	0.001
1259	9	A_30_P01018855	A_55_P1997421	0.857143	0.0036
1260	10	A_30_P01018855	A_55_P1997676	0.809524	0.0061
1261	11	A_30_P01018855	A_55_P2052465	0.738095	0.0172
1262	12	A_30_P01018855	A_55_P2063486	0.904762	0.0012
1263	13	A_30_P01018855	A_55_P2067717	0.738095	0.0132
1264	14	A_30_P01018855	A_55_P2090299	0.761905	0.0146
1265	15	A_30_P01018855	A_55_P2095558	0.904762	0.0007
1266	16	A_30_P01018855	A_55_P2107681	0.738095	0.019
1267	17	A_30_P01018855	A_55_P2110210	0.857143	0.0036
1268	18	A_30_P01018855	A_55_P2117475	0.857143	0.0034
1269	19	A_30_P01018855	A_55_P2137073	0.857143	0.0032
1270	20	A_30_P01018855	A_55_P2143085	0.97619	0.0001
1271	21	A_30_P01018855	A_55_P2143296	0.880952	0.0017
1272	22	A_30_P01018855	A_55_P2164932	0.880952	0.0026
1273	23	A_30_P01018855	A_55_P2421222	0.738095	0.0193
1274	24	A_30_P01018855	A_55_P2472184	0.880952	0.0017
1275	25	A_30_P01018855	A_66_P136032	0.857143	0.0036
1276	26	A_30_P01018855	A_51_P263953	-0.904762	0.0009
1277	27	A_30_P01018855	A_55_P2113021	-0.785714	0.0108
1278	28	A_30_P01018855	A_55_P2126590	-0.761905	0.0133
1279	29	A_30_P01018855	A_55_P2164608	-0.880952	0.0021
1280	30	A_30_P01018855	A_55_P2252876	-0.785714	0.0114
1281	1	A_30_P01018912	A_51_P126275	0.738095	0.0177
1282	2	A_30_P01018912	A_51_P167597	0.880952	0.0019
1283	3	A_30_P01018912	A_51_P257841	0.761905	0.0151
1284	4	A_30_P01018912	A_51_P266733	0.714286	0.0239
1285	5	A_30_P01018912	A_51_P348217	0.761905	0.0144
1286	6	A_30_P01018912	A_51_P353735	0.714286	0.0215
1287	7	A_30_P01018912	A_51_P364210	0.833333	0.0059
1288	8	A_30_P01018912	A_51_P391934	0.738095	0.0179
1289	9	A_30_P01018912	A_51_P419103	0.738095	0.0183
1290	10	A_30_P01018912	A_51_P442118	0.761905	0.0141
1291	11	A_30_P01018912	A_51_P459944	0.738095	0.0187
1292	12	A_30_P01018912	A_52_P117408	0.904762	0.001
1293	13	A_30_P01018912	A_52_P209514	0.738095	0.0189
1294	14	A_30_P01018912	A_52_P356128	0.880952	0.0026
1295	15	A_30_P01018912	A_52_P397957	0.714286	0.0246
1296	16	A_30_P01018912	A_52_P551844	0.857143	0.0035
1297	17	A_30_P01018912	A_52_P599573	0.809524	0.0074
1298	18	A_30_P01018912	A_52_P612251	0.857143	0.0032
1299	19	A_30_P01018912	A_55_P1952469	0.785714	0.0083
1300	20	A_30_P01018912	A_55_P1959122	0.785714	0.0105
1301	21	A_30_P01018912	A_55_P1966216	0.761905	0.0128
1302	22	A_30_P01018912	A_55_P1968808	0.785714	0.0095
1303	23	A_30_P01018912	A_55_P1969152	0.714286	0.0234
1304	24	A_30_P01018912	A_55_P1971571	0.714286	0.0241
1305	25	A_30_P01018912	A_55_P1973203	0.714286	0.0217
1306	26	A_30_P01018912	A_55_P1977052	0.904762	0.0012
1307	27	A_30_P01018912	A_55_P1977776	0.714286	0.0238
1308	28	A_30_P01018912	A_55_P1980550	0.785714	0.0095
1309	29	A_30_P01018912	A_55_P1985628	0.738095	0.0182
1310	30	A_30_P01018912	A_55_P1986183	0.714286	0.0228
1311	31	A_30_P01018912	A_55_P1997903	0.738095	0.0176
1312	32	A_30_P01018912	A_55_P2003004	0.738095	0.0183
1313	33	A_30_P01018912	A_55_P2003883	0.857143	0.0035
1314	34	A_30_P01018912	A_55_P2012314	0.738095	0.0168
1315	35	A_30_P01018912	A_55_P2014853	0.714286	0.0207
1316	36	A_30_P01018912	A_55_P2014854	0.714286	0.0228
1317	37	A_30_P01018912	A_55_P2015635	0.785714	0.01
1318	38	A_30_P01018912	A_55_P2017465	0.761905	0.0145
1319	39	A_30_P01018912	A_55_P2025443	0.809524	0.0073
1320	40	A_30_P01018912	A_55_P2026880	0.857143	0.0047
1321	41	A_30_P01018912	A_55_P2031333	0.785714	0.0111
1322	42	A_30_P01018912	A_55_P2031681	0.785714	0.0107
1323	43	A_30_P01018912	A_55_P2032009	0.738095	0.0201
1324	44	A_30_P01018912	A_55_P2045040	0.738095	0.0186
1325	45	A_30_P01018912	A_55_P2062513	0.738095	0.0166
1326	46	A_30_P01018912	A_55_P2069891	0.738095	0.0166
1327	47	A_30_P01018912	A_55_P2075253	0.738095	0.0203
1328	48	A_30_P01018912	A_55_P2088755	0.952381	0.0001
1329	49	A_30_P01018912	A_55_P2089858	0.761905	0.0136
1330	50	A_30_P01018912	A_55_P2091616	0.809524	0.0067
1331	51	A_30_P01018912	A_55_P2093749	0.833333	0.0056
1332	52	A_30_P01018912	A_55_P2094044	0.833333	0.0049
1333	53	A_30_P01018912	A_55_P2097333	0.833333	0.005
1334	54	A_30_P01018912	A_55_P2100272	0.809524	0.008
1335	55	A_30_P01018912	A_55_P2107681	0.785714	0.012
1336	56	A_30_P01018912	A_55_P2108813	0.761905	0.0135
1337	57	A_30_P01018912	A_55_P2111698	0.809524	0.0093
1338	58	A_30_P01018912	A_55_P2113335	0.904762	0.0015
1339	59	A_30_P01018912	A_55_P2121484	0.857143	0.0026
1340	60	A_30_P01018912	A_55_P2127755	0.928571	0.0003
1341	61	A_30_P01018912	A_55_P2130114	0.738095	0.0198
1342	62	A_30_P01018912	A_55_P2134336	0.738095	0.0189
1343	63	A_30_P01018912	A_55_P2140764	0.857143	0.0047
1344	64	A_30_P01018912	A_55_P2144256	0.714286	0.0227
1345	65	A_30_P01018912	A_55_P2150580	0.738095	0.0147
1346	66	A_30_P01018912	A_55_P2160663	0.738095	0.0196
1347	67	A_30_P01018912	A_55_P2162815	0.880952	0.0023
1348	68	A_30_P01018912	A_55_P2172693	0.857143	0.004
1349	69	A_30_P01018912	A_55_P2201612	0.809524	0.0082
1350	70	A_30_P01018912	A_55_P2202598	0.833333	0.0056
1351	71	A_30_P01018912	A_55_P2244941	0.857143	0.0035
1352	72	A_30_P01018912	A_55_P2247021	0.833333	0.0049
1353	73	A_30_P01018912	A_55_P2267696	0.809524	0.0086
1354	74	A_30_P01018912	A_55_P2294051	0.857143	0.003
1355	75	A_30_P01018912	A_55_P2361731	0.809524	0.0074
1356	76	A_30_P01018912	A_66_P125538	0.738095	0.019
1357	77	A_30_P01018912	A_66_P133119	0.761905	0.0134
1358	78	A_30_P01018912	A_66_P140954	0.714286	0.0205
1359	79	A_30_P01018912	A_52_P172014	-0.785714	0.0104
1360	80	A_30_P01018912	A_52_P284958	-0.761905	0.0146
1361	81	A_30_P01018912	A_52_P53019	-0.761905	0.0153
1362	82	A_30_P01018912	A_52_P70854	-0.785714	0.0093
1363	83	A_30_P01018912	A_55_P1972297	-0.714286	0.0246
1364	84	A_30_P01018912	A_55_P2006862	-0.738095	0.0184
1365	85	A_30_P01018912	A_55_P2019841	-0.833333	0.0058
1366	86	A_30_P01018912	A_55_P2053788	-0.857143	0.0032
1367	87	A_30_P01018912	A_55_P2179027	-0.785714	0.0115
1368	88	A_30_P01018912	A_55_P2322104	-0.857143	0.0036
1369	1	A_30_P01018984	A_51_P266733	-0.761905	0.0124
1370	2	A_30_P01018984	A_51_P303316	0.738095	0.0198
1371	3	A_30_P01018984	A_51_P379698	0.785714	0.0114
1372	4	A_30_P01018984	A_52_P1516	0.785714	0.01
1373	5	A_30_P01018984	A_55_P1957866	0.761905	0.0135
1374	6	A_30_P01018984	A_55_P1964138	-0.714286	0.0211
1375	7	A_30_P01018984	A_55_P1974178	0.714286	0.0234
1376	8	A_30_P01018984	A_55_P1974760	0.761905	0.0153
1377	9	A_30_P01018984	A_55_P1982991	0.761905	0.012
1378	10	A_30_P01018984	A_55_P1986183	-0.738095	0.0195
1379	11	A_30_P01018984	A_55_P1986888	-0.809524	0.0071
1380	12	A_30_P01018984	A_55_P1987406	0.809524	0.0069
1381	13	A_30_P01018984	A_55_P1988774	-0.833333	0.005
1382	14	A_30_P01018984	A_55_P2001583	-0.738095	0.0166
1383	15	A_30_P01018984	A_55_P2003004	-0.833333	0.0059
1384	16	A_30_P01018984	A_55_P2003883	-0.714286	0.0241
1385	17	A_30_P01018984	A_55_P2014854	-0.714286	0.0234
1386	18	A_30_P01018984	A_55_P2025328	-0.785714	0.0111
1387	19	A_30_P01018984	A_55_P2029581	0.904762	0.0009
1388	20	A_30_P01018984	A_55_P2062021	-0.714286	0.0248
1389	21	A_30_P01018984	A_55_P2096035	0.738095	0.0186
1390	22	A_30_P01018984	A_55_P2111322	0.809524	0.0071
1391	23	A_30_P01018984	A_55_P2111603	0.785714	0.0116
1392	24	A_30_P01018984	A_55_P2124582	0.738095	0.0216
1393	25	A_30_P01018984	A_55_P2131747	-0.761905	0.0126
1394	26	A_30_P01018984	A_55_P2144256	-0.714286	0.0248
1395	27	A_30_P01018984	A_55_P2164492	0.714286	0.0234
1396	28	A_30_P01018984	A_55_P2164932	0.714286	0.0235
1397	29	A_30_P01018984	A_55_P2184023	0.738095	0.0185
1398	30	A_30_P01018984	A_55_P2184209	0.761905	0.0132
1399	31	A_30_P01018984	A_55_P2193487	0.738095	0.0171
1400	32	A_30_P01018984	A_55_P2250391	-0.904762	0.0006
1401	33	A_30_P01018984	A_55_P2287260	-0.833333	0.0055
1402	34	A_30_P01018984	A_55_P2421222	0.833333	0.0049
1403	35	A_30_P01018984	A_51_P168630	0.761905	0.0119
1404	36	A_30_P01018984	A_51_P271136	-0.714286	0.0249
1405	37	A_30_P01018984	A_51_P351970	0.904762	0.001
1406	38	A_30_P01018984	A_51_P374726	0.714286	0.0222
1407	39	A_30_P01018984	A_51_P392303	-0.761905	0.0127
1408	40	A_30_P01018984	A_51_P444437	-0.714286	0.0236
1409	41	A_30_P01018984	A_52_P53019	0.714286	0.0196
1410	42	A_30_P01018984	A_55_P1954086	-0.785714	0.0131
1411	43	A_30_P01018984	A_55_P1962851	0.857143	0.0041
1412	44	A_30_P01018984	A_55_P1963547	-0.761905	0.0115
1413	45	A_30_P01018984	A_55_P1972297	0.714286	0.0244
1414	46	A_30_P01018984	A_55_P2001818	-0.714286	0.0212
1415	47	A_30_P01018984	A_55_P2008016	0.809524	0.0084
1416	48	A_30_P01018984	A_55_P2020612	0.761905	0.0125
1417	49	A_30_P01018984	A_55_P2057528	0.785714	0.0113
1418	50	A_30_P01018984	A_55_P2084348	-0.738095	0.0183
1419	51	A_30_P01018984	A_55_P2086240	-0.761905	0.015
1420	52	A_30_P01018984	A_55_P2126590	-0.857143	0.0031
1421	53	A_30_P01018984	A_55_P2142928	-0.785714	0.0113
1422	54	A_30_P01018984	A_55_P2205769	0.880952	0.003
1423	1	A_30_P01018997	A_51_P126275	0.857143	0.0034
1424	2	A_30_P01018997	A_51_P148478	0.761905	0.0137
1425	3	A_30_P01018997	A_51_P210732	0.880952	0.0028
1426	4	A_30_P01018997	A_51_P288541	0.714286	0.0228
1427	5	A_30_P01018997	A_51_P324473	0.785714	0.0133
1428	6	A_30_P01018997	A_51_P348217	0.785714	0.011
1429	7	A_30_P01018997	A_51_P442118	0.857143	0.0036
1430	8	A_30_P01018997	A_52_P117408	0.809524	0.0075
1431	9	A_30_P01018997	A_52_P363843	0.738095	0.0186
1432	10	A_30_P01018997	A_52_P612251	0.833333	0.0062
1433	11	A_30_P01018997	A_55_P1959122	0.809524	0.0076
1434	12	A_30_P01018997	A_55_P1969949	0.714286	0.0229
1435	13	A_30_P01018997	A_55_P1985628	0.738095	0.0188
1436	14	A_30_P01018997	A_55_P1989449	0.714286	0.022
1437	15	A_30_P01018997	A_55_P2008644	0.880952	0.0016
1438	16	A_30_P01018997	A_55_P2012314	0.761905	0.0125
1439	17	A_30_P01018997	A_55_P2014854	0.714286	0.0215
1440	18	A_30_P01018997	A_55_P2015635	0.714286	0.0239
1441	19	A_30_P01018997	A_55_P2029031	0.738095	0.0189
1442	20	A_30_P01018997	A_55_P2032009	0.809524	0.009
1443	21	A_30_P01018997	A_55_P2033116	0.761905	0.0153
1444	22	A_30_P01018997	A_55_P2062513	0.761905	0.0139
1445	23	A_30_P01018997	A_55_P2069891	0.833333	0.0048
1446	24	A_30_P01018997	A_55_P2075253	0.928571	0.0008
1447	25	A_30_P01018997	A_55_P2088755	0.857143	0.0037
1448	26	A_30_P01018997	A_55_P2093749	0.714286	0.0212
1449	27	A_30_P01018997	A_55_P2098782	0.809524	0.0084
1450	28	A_30_P01018997	A_55_P2100272	0.833333	0.006
1451	29	A_30_P01018997	A_55_P2104343	0.738095	0.0178
1452	30	A_30_P01018997	A_55_P2111698	0.809524	0.0084
1453	31	A_30_P01018997	A_55_P2123045	0.738095	0.0178
1454	32	A_30_P01018997	A_55_P2130114	0.809524	0.0086
1455	33	A_30_P01018997	A_55_P2139668	0.928571	0.0004
1456	34	A_30_P01018997	A_55_P2144256	0.738095	0.0173
1457	35	A_30_P01018997	A_55_P2244941	0.785714	0.0096
1458	36	A_30_P01018997	A_55_P2267696	0.809524	0.0066
1459	37	A_30_P01018997	A_55_P2431897	0.761905	0.0146
1460	38	A_30_P01018997	A_66_P133119	0.952381	0.0002
1461	39	A_30_P01018997	A_51_P363214	-0.785714	0.0102
1462	40	A_30_P01018997	A_52_P387884	-0.785714	0.011
1463	41	A_30_P01018997	A_55_P1972297	-0.714286	0.0229
1464	42	A_30_P01018997	A_55_P2008214	-0.738095	0.019
1465	43	A_30_P01018997	A_55_P2019841	-0.833333	0.0057
1466	44	A_30_P01018997	A_55_P2039537	-0.714286	0.0222
1467	45	A_30_P01018997	A_55_P2053788	-0.833333	0.0061
1468	46	A_30_P01018997	A_55_P2061333	-0.761905	0.0156
1469	47	A_30_P01018997	A_55_P2110327	-0.880952	0.0023
1470	48	A_30_P01018997	A_55_P2158011	-0.785714	0.011
1471	49	A_30_P01018997	A_55_P2179027	-0.761905	0.0157
1472	50	A_30_P01018997	A_66_P105460	-0.809524	0.0085
1473	1	A_30_P01019002	A_51_P167876	0.809524	0.0076
1474	2	A_30_P01019002	A_51_P223724	0.714286	0.022
1475	3	A_30_P01019002	A_51_P237585	0.761905	0.0139
1476	4	A_30_P01019002	A_51_P273157	0.714286	0.0219
1477	5	A_30_P01019002	A_51_P378336	0.857143	0.0041
1478	6	A_30_P01019002	A_51_P386270	-0.761905	0.0128
1479	7	A_30_P01019002	A_52_P112591	-0.714286	0.0239
1480	8	A_30_P01019002	A_52_P121015	0.833333	0.0053
1481	9	A_30_P01019002	A_52_P142520	0.904762	0.0008
1482	10	A_30_P01019002	A_52_P210909	0.857143	0.0033
1483	11	A_30_P01019002	A_52_P594302	0.738095	0.0173
1484	12	A_30_P01019002	A_52_P613808	0.833333	0.0045
1485	13	A_30_P01019002	A_52_P659270	0.761905	0.0124
1486	14	A_30_P01019002	A_52_P662711	-0.714286	0.0233
1487	15	A_30_P01019002	A_52_P684087	0.761905	0.0154
1488	16	A_30_P01019002	A_55_P1961180	0.928571	0.0008
1489	17	A_30_P01019002	A_55_P1973203	0.857143	0.0035
1490	18	A_30_P01019002	A_55_P1973326	0.761905	0.0156
1491	19	A_30_P01019002	A_55_P1976903	-0.714286	0.0226
1492	20	A_30_P01019002	A_55_P1980550	0.738095	0.0178
1493	21	A_30_P01019002	A_55_P1982467	0.833333	0.0054
1494	22	A_30_P01019002	A_55_P1982991	0.714286	0.0209
1495	23	A_30_P01019002	A_55_P1997903	0.761905	0.0139
1496	24	A_30_P01019002	A_55_P1999187	0.904762	0.0013
1497	25	A_30_P01019002	A_55_P2002469	0.738095	0.0206
1498	26	A_30_P01019002	A_55_P2004365	0.833333	0.0054
1499	27	A_30_P01019002	A_55_P2021699	0.833333	0.0056
1500	28	A_30_P01019002	A_55_P2042183	0.952381	0.0001
1501	29	A_30_P01019002	A_55_P2044257	0.97619	0
1502	30	A_30_P01019002	A_55_P2072041	0.809524	0.0076
1503	31	A_30_P01019002	A_55_P2087153	0.880952	0.0022
1504	32	A_30_P01019002	A_55_P2104343	0.785714	0.0104
1505	33	A_30_P01019002	A_55_P2108813	0.857143	0.0033
1506	34	A_30_P01019002	A_55_P2109927	0.785714	0.0119
1507	35	A_30_P01019002	A_55_P2112564	0.928571	0.0001
1508	36	A_30_P01019002	A_55_P2117146	0.714286	0.0204
1509	37	A_30_P01019002	A_55_P2121794	0.738095	0.0168
1510	38	A_30_P01019002	A_55_P2121985	0.833333	0.0059
1511	39	A_30_P01019002	A_55_P2125791	0.785714	0.0087
1512	40	A_30_P01019002	A_55_P2134336	0.738095	0.0186
1513	41	A_30_P01019002	A_55_P2135203	0.904762	0.0013
1514	42	A_30_P01019002	A_55_P2148828	0.857143	0.0044
1515	43	A_30_P01019002	A_55_P2164890	0.857143	0.0035
1516	44	A_30_P01019002	A_55_P2175440	0.809524	0.0092
1517	45	A_30_P01019002	A_55_P2182523	0.904762	0.0011
1518	46	A_30_P01019002	A_55_P2207110	0.833333	0.0061
1519	47	A_30_P01019002	A_55_P2236291	-0.714286	0.024
1520	48	A_30_P01019002	A_55_P2273929	0.714286	0.0228
1521	49	A_30_P01019002	A_55_P2330173	0.833333	0.006
1522	50	A_30_P01019002	A_55_P2367878	0.785714	0.0111
1523	51	A_30_P01019002	A_55_P2401624	-0.714286	0.0211
1524	52	A_30_P01019002	A_55_P2431897	0.714286	0.0229
1525	53	A_30_P01019002	A_66_P119812	0.809524	0.0073
1526	54	A_30_P01019002	A_66_P121193	0.785714	0.011
1527	55	A_30_P01019002	A_66_P124975	0.833333	0.005
1528	56	A_30_P01019002	A_66_P129619	0.880952	0.0023
1529	57	A_30_P01019002	A_66_P133225	0.809524	0.0074
1530	58	A_30_P01019002	A_66_P140525	0.761905	0.0169
1531	59	A_30_P01019002	A_51_P126337	-0.880952	0.0021
1532	60	A_30_P01019002	A_51_P150653	-0.809524	0.0076
1533	61	A_30_P01019002	A_51_P298615	-0.809524	0.0079
1534	62	A_30_P01019002	A_51_P426270	-0.904762	0.001
1535	63	A_30_P01019002	A_52_P236398	-0.714286	0.0221
1536	64	A_30_P01019002	A_52_P422494	-0.809524	0.0076
1537	65	A_30_P01019002	A_55_P1965659	-0.761905	0.0123
1538	66	A_30_P01019002	A_55_P1997225	-0.761905	0.0153
1539	67	A_30_P01019002	A_55_P2007500	-0.833333	0.0062
1540	68	A_30_P01019002	A_55_P2061333	-0.714286	0.0228
1541	69	A_30_P01019002	A_55_P2088183	-0.738095	0.0199
1542	70	A_30_P01019002	A_55_P2091032	-0.714286	0.0208
1543	71	A_30_P01019002	A_55_P2092164	-0.738095	0.0183
1544	72	A_30_P01019002	A_55_P2141817	-0.738095	0.0182
1545	73	A_30_P01019002	A_55_P2160181	0.761905	0.0133
1546	74	A_30_P01019002	A_55_P2388762	0.714286	0.0249
1547	75	A_30_P01019002	A_65_P20433	-0.904762	0.0007
1548	1	A_30_P01019021	A_51_P249104	0.761905	0.0158
1549	2	A_30_P01019021	A_51_P273157	0.904762	0.0015
1550	3	A_30_P01019021	A_51_P398833	0.809524	0.0075
1551	4	A_30_P01019021	A_51_P433887	0.738095	0.0189
1552	5	A_30_P01019021	A_51_P455326	0.738095	0.0163
1553	6	A_30_P01019021	A_52_P659270	0.714286	0.0211
1554	7	A_30_P01019021	A_52_P684087	0.904762	0.0009
1555	8	A_30_P01019021	A_55_P1967473	0.809524	0.0093
1556	9	A_30_P01019021	A_55_P1974760	0.880952	0.0028
1557	10	A_30_P01019021	A_55_P1980550	0.761905	0.0134
1558	11	A_30_P01019021	A_55_P1981035	0.761905	0.0154
1559	12	A_30_P01019021	A_55_P1982467	0.714286	0.022
1560	13	A_30_P01019021	A_55_P1982991	0.880952	0.002
1561	14	A_30_P01019021	A_55_P1987117	0.880952	0.0016
1562	15	A_30_P01019021	A_55_P1999187	0.761905	0.0154
1563	16	A_30_P01019021	A_55_P2000978	0.785714	0.0118
1564	17	A_30_P01019021	A_55_P2002469	0.952381	0.0004
1565	18	A_30_P01019021	A_55_P2021816	0.761905	0.0117
1566	19	A_30_P01019021	A_55_P2028130	0.857143	0.0044
1567	20	A_30_P01019021	A_55_P2029031	0.738095	0.0173
1568	21	A_30_P01019021	A_55_P2029581	0.809524	0.0078
1569	22	A_30_P01019021	A_55_P2042183	0.738095	0.0163
1570	23	A_30_P01019021	A_55_P2044257	0.738095	0.0177
1571	24	A_30_P01019021	A_55_P2044528	0.761905	0.0133
1572	25	A_30_P01019021	A_55_P2050962	0.714286	0.0225
1573	26	A_30_P01019021	A_55_P2084606	0.785714	0.0121
1574	27	A_30_P01019021	A_55_P2105239	0.714286	0.0229
1575	28	A_30_P01019021	A_55_P2109927	0.785714	0.011
1576	29	A_30_P01019021	A_55_P2121794	0.809524	0.0085
1577	30	A_30_P01019021	A_55_P2133767	0.714286	0.0223
1578	31	A_30_P01019021	A_55_P2134336	0.714286	0.0235
1579	32	A_30_P01019021	A_55_P2135203	0.714286	0.0228
1580	33	A_30_P01019021	A_55_P2148828	0.738095	0.0193
1581	34	A_30_P01019021	A_55_P2164890	0.833333	0.0054
1582	35	A_30_P01019021	A_55_P2164932	0.738095	0.018
1583	36	A_30_P01019021	A_55_P2170464	0.714286	0.0211
1584	37	A_30_P01019021	A_55_P2207110	0.714286	0.0243
1585	38	A_30_P01019021	A_55_P2243237	0.809524	0.0081
1586	39	A_30_P01019021	A_55_P2421222	0.809524	0.0073
1587	40	A_30_P01019021	A_66_P119812	0.880952	0.002
1588	41	A_30_P01019021	A_66_P124975	0.714286	0.0232
1589	42	A_30_P01019021	A_66_P136032	0.714286	0.0222
1590	43	A_30_P01019021	A_51_P126337	-0.833333	0.0067
1591	44	A_30_P01019021	A_51_P298615	-0.904762	0.001
1592	45	A_30_P01019021	A_51_P392303	-0.857143	0.0041
1593	46	A_30_P01019021	A_51_P426270	-0.761905	0.0147
1594	47	A_30_P01019021	A_55_P2088223	-0.738095	0.0163
1595	48	A_30_P01019021	A_55_P2126590	-0.714286	0.0211
1596	49	A_30_P01019021	A_55_P2141817	-0.809524	0.0105
1597	50	A_30_P01019021	A_55_P2142928	-0.833333	0.0051
1598	51	A_30_P01019021	A_55_P2249344	-0.785714	0.0101
1599	52	A_30_P01019021	A_55_P2328082	-0.809524	0.0071
1600	1	A_30_P01019040	A_51_P148478	0.738095	0.0193
1601	2	A_30_P01019040	A_51_P378903	0.738095	0.0184
1602	3	A_30_P01019040	A_52_P114962	0.833333	0.0043
1603	4	A_30_P01019040	A_55_P1966254	0.714286	0.0226
1604	5	A_30_P01019040	A_55_P1985628	0.761905	0.0114
1605	6	A_30_P01019040	A_55_P2012314	0.738095	0.0172
1606	7	A_30_P01019040	A_55_P2017465	0.809524	0.007
1607	8	A_30_P01019040	A_55_P2029031	0.738095	0.016
1608	9	A_30_P01019040	A_55_P2062513	0.738095	0.0186
1609	10	A_30_P01019040	A_55_P2069891	0.738095	0.0172
1610	11	A_30_P01019040	A_55_P2089665	0.761905	0.0148
1611	12	A_30_P01019040	A_55_P2123045	0.761905	0.0176
1612	13	A_30_P01019040	A_55_P2150580	0.738095	0.0172
1613	14	A_30_P01019040	A_55_P2176898	0.738095	0.0192
1614	15	A_30_P01019040	A_55_P2200870	0.761905	0.0133
1615	16	A_30_P01019040	A_55_P2377436	0.833333	0.0053
1616	17	A_30_P01019040	A_51_P363214	-0.880952	0.0019
1617	18	A_30_P01019040	A_51_P404139	-0.761905	0.013
1618	19	A_30_P01019040	A_52_P98614	-0.690476	0.0249
1619	20	A_30_P01019040	A_55_P1988907	-0.714286	0.0227
1620	21	A_30_P01019040	A_55_P2013336	-0.738095	0.0192
1621	22	A_30_P01019040	A_55_P2019841	-0.714286	0.0239
1622	23	A_30_P01019040	A_55_P2067620	-0.761905	0.0142
1623	24	A_30_P01019040	A_55_P2094632	-0.738095	0.0183
1624	25	A_30_P01019040	A_55_P2105963	-0.714286	0.0233
1625	26	A_30_P01019040	A_55_P2167537	-0.738095	0.0183
1626	1	A_30_P01019171	A_51_P121607	0.857143	0.0051
1627	2	A_30_P01019171	A_51_P137452	0.904762	0.0006
1628	3	A_30_P01019171	A_51_P192203	0.738095	0.0186
1629	4	A_30_P01019171	A_51_P206235	0.904762	0.0009
1630	5	A_30_P01019171	A_51_P223724	0.809524	0.0082
1631	6	A_30_P01019171	A_51_P249104	0.833333	0.006
1632	7	A_30_P01019171	A_51_P398833	0.714286	0.0195
1633	8	A_30_P01019171	A_51_P433887	0.880952	0.003
1634	9	A_30_P01019171	A_51_P459944	0.833333	0.0045
1635	10	A_30_P01019171	A_52_P209514	0.880952	0.0024
1636	11	A_30_P01019171	A_52_P229981	0.833333	0.005
1637	12	A_30_P01019171	A_52_P628915	0.880952	0.0022
1638	13	A_30_P01019171	A_55_P1952469	0.761905	0.0152
1639	14	A_30_P01019171	A_55_P1966254	0.857143	0.0038
1640	15	A_30_P01019171	A_55_P1967473	0.809524	0.0068
1641	16	A_30_P01019171	A_55_P1968603	0.738095	0.015
1642	17	A_30_P01019171	A_55_P1968683	0.833333	0.0057
1643	18	A_30_P01019171	A_55_P1981035	0.833333	0.0062
1644	19	A_30_P01019171	A_55_P1982467	0.785714	0.0096
1645	20	A_30_P01019171	A_55_P1986401	0.809524	0.0078
1646	21	A_30_P01019171	A_55_P1987117	0.761905	0.0177
1647	22	A_30_P01019171	A_55_P1997421	0.809524	0.0067
1648	23	A_30_P01019171	A_55_P2000978	0.738095	0.0177
1649	24	A_30_P01019171	A_55_P2015635	0.809524	0.007
1650	25	A_30_P01019171	A_55_P2031681	0.880952	0.0023
1651	26	A_30_P01019171	A_55_P2044528	0.761905	0.0146
1652	27	A_30_P01019171	A_55_P2050962	0.714286	0.0233
1653	28	A_30_P01019171	A_55_P2057430	0.880952	0.0022
1654	29	A_30_P01019171	A_55_P2063486	0.809524	0.0075
1655	30	A_30_P01019171	A_55_P2071142	0.857143	0.0036
1656	31	A_30_P01019171	A_55_P2075962	0.761905	0.0152
1657	32	A_30_P01019171	A_55_P2088846	0.833333	0.0055
1658	33	A_30_P01019171	A_55_P2090299	1	0
1659	34	A_30_P01019171	A_55_P2095558	0.738095	0.0213
1660	35	A_30_P01019171	A_55_P2103992	0.785714	0.0124
1661	36	A_30_P01019171	A_55_P2105239	0.833333	0.0056
1662	37	A_30_P01019171	A_55_P2107681	0.833333	0.0055
1663	38	A_30_P01019171	A_55_P2110210	0.97619	0
1664	39	A_30_P01019171	A_55_P2117475	0.809524	0.0086
1665	40	A_30_P01019171	A_55_P2123045	0.714286	0.0239
1666	41	A_30_P01019171	A_55_P2127194	0.809524	0.0079
1667	42	A_30_P01019171	A_55_P2143085	0.809524	0.0089
1668	43	A_30_P01019171	A_55_P2143296	0.833333	0.0048
1669	44	A_30_P01019171	A_55_P2150580	0.880952	0.0025
1670	45	A_30_P01019171	A_55_P2164932	0.809524	0.007
1671	46	A_30_P01019171	A_55_P2176898	0.904762	0.0009
1672	47	A_30_P01019171	A_55_P2184209	0.761905	0.0131
1673	48	A_30_P01019171	A_55_P2184511	0.857143	0.003
1674	49	A_30_P01019171	A_55_P2243237	0.833333	0.0043
1675	50	A_30_P01019171	A_55_P2247021	0.833333	0.0066
1676	51	A_30_P01019171	A_55_P2340820	0.809524	0.0078
1677	52	A_30_P01019171	A_55_P2421222	0.738095	0.0172
1678	53	A_30_P01019171	A_55_P2472184	0.761905	0.0133
1679	54	A_30_P01019171	A_66_P114616	0.714286	0.0235
1680	55	A_30_P01019171	A_66_P120970	0.904762	0.0009
1681	56	A_30_P01019171	A_66_P124975	0.785714	0.0118
1682	57	A_30_P01019171	A_66_P125538	0.809524	0.0086
1683	58	A_30_P01019171	A_66_P135885	0.761905	0.0113
1684	59	A_30_P01019171	A_66_P136032	0.857143	0.0043
1685	60	A_30_P01019171	A_51_P263953	-0.809524	0.0083
1686	61	A_30_P01019171	A_55_P2113021	-0.880952	0.0024
1687	62	A_30_P01019171	A_55_P2167537	-0.809524	0.0089
1688	63	A_30_P01019171	A_55_P2328082	-0.785714	0.0116
1689	1	A_30_P01019249	A_51_P124126	0.761905	0.0134
1690	2	A_30_P01019249	A_51_P186899	0.714286	0.0218
1691	3	A_30_P01019249	A_51_P226962	0.809524	0.0093
1692	4	A_30_P01019249	A_51_P230552	0.809524	0.0082
1693	5	A_30_P01019249	A_51_P278230	0.714286	0.0239
1694	6	A_30_P01019249	A_51_P327996	0.738095	0.0166
1695	7	A_30_P01019249	A_51_P364210	0.738095	0.0198
1696	8	A_30_P01019249	A_51_P384306	0.761905	0.0133
1697	9	A_30_P01019249	A_51_P391955	0.714286	0.0212
1698	10	A_30_P01019249	A_51_P416669	0.904762	0.0016
1699	11	A_30_P01019249	A_52_P106285	0.809524	0.0069
1700	12	A_30_P01019249	A_52_P168575	0.833333	0.0065
1701	13	A_30_P01019249	A_52_P480859	0.833333	0.0047
1702	14	A_30_P01019249	A_52_P496173	0.880952	0.003
1703	15	A_30_P01019249	A_52_P599573	0.785714	0.0109
1704	16	A_30_P01019249	A_52_P70796	0.714286	0.0233
1705	17	A_30_P01019249	A_55_P1954856	0.809524	0.0071
1706	18	A_30_P01019249	A_55_P1976387	0.880952	0.0017
1707	19	A_30_P01019249	A_55_P1979364	0.738095	0.0199
1708	20	A_30_P01019249	A_55_P1986888	0.738095	0.0187
1709	21	A_30_P01019249	A_55_P1987800	0.738095	0.0177
1710	22	A_30_P01019249	A_55_P2022258	0.833333	0.0069
1711	23	A_30_P01019249	A_55_P2045697	0.904762	0.0013
1712	24	A_30_P01019249	A_55_P2051377	0.714286	0.0214
1713	25	A_30_P01019249	A_55_P2058040	0.738095	0.0163
1714	26	A_30_P01019249	A_55_P2096973	0.738095	0.0185
1715	27	A_30_P01019249	A_55_P2098340	0.785714	0.0104
1716	28	A_30_P01019249	A_55_P2098971	0.809524	0.0081
1717	29	A_30_P01019249	A_55_P2100290	0.761905	0.0131
1718	30	A_30_P01019249	A_55_P2101088	0.714286	0.0218
1719	31	A_30_P01019249	A_55_P2102991	0.714286	0.0242
1720	32	A_30_P01019249	A_55_P2105452	0.714286	0.0242
1721	33	A_30_P01019249	A_55_P2118843	0.714286	0.0223
1722	34	A_30_P01019249	A_55_P2133431	0.880952	0.0019
1723	35	A_30_P01019249	A_55_P2152991	0.809524	0.0092
1724	36	A_30_P01019249	A_55_P2157384	0.761905	0.0129
1725	37	A_30_P01019249	A_55_P2208682	0.809524	0.0079
1726	38	A_30_P01019249	A_55_P2236291	0.738095	0.0174
1727	39	A_30_P01019249	A_66_P100840	0.738095	0.0163
1728	40	A_30_P01019249	A_66_P114826	0.761905	0.015
1729	41	A_30_P01019249	A_66_P136569	0.809524	0.0073
1730	42	A_30_P01019249	A_66_P139675	0.833333	0.0049
1731	43	A_30_P01019249	A_51_P204252	-0.833333	0.0057
1732	44	A_30_P01019249	A_51_P374726	-0.785714	0.0118
1733	45	A_30_P01019249	A_52_P284958	-0.809524	0.0095
1734	46	A_30_P01019249	A_55_P1957148	-0.761905	0.0131
1735	47	A_30_P01019249	A_55_P1964327	-0.809524	0.0082
1736	48	A_30_P01019249	A_55_P1982019	-0.857143	0.0041
1737	49	A_30_P01019249	A_55_P2001628	-0.904762	0.0014
1738	50	A_30_P01019249	A_55_P2006668	-0.738095	0.0176
1739	51	A_30_P01019249	A_55_P2044292	-0.880952	0.0028
1740	52	A_30_P01019249	A_55_P2078780	-0.785714	0.0113
1741	53	A_30_P01019249	A_55_P2079425	-0.738095	0.0182
1742	54	A_30_P01019249	A_55_P2156022	-0.833333	0.0054
1743	55	A_30_P01019249	A_55_P2201454	-0.714286	0.0244
1744	56	A_30_P01019249	A_55_P2388762	-0.738095	0.0186
1745	57	A_30_P01019249	A_66_P137374	-0.761905	0.0152
1746	1	A_30_P01019318	A_51_P126275	0.833333	0.0058
1747	2	A_30_P01019318	A_51_P148478	0.785714	0.011
1748	3	A_30_P01019318	A_51_P186899	0.738095	0.0181
1749	4	A_30_P01019318	A_51_P193189	0.880952	0.0035
1750	5	A_30_P01019318	A_51_P210732	0.785714	0.0113
1751	6	A_30_P01019318	A_51_P257841	0.880952	0.0021
1752	7	A_30_P01019318	A_51_P288541	0.952381	0.0002
1753	8	A_30_P01019318	A_51_P308912	0.761905	0.0121
1754	9	A_30_P01019318	A_51_P324473	0.880952	0.0024
1755	10	A_30_P01019318	A_51_P348217	0.880952	0.0013
1756	11	A_30_P01019318	A_51_P353735	0.761905	0.0143
1757	12	A_30_P01019318	A_51_P442118	0.761905	0.0145
1758	13	A_30_P01019318	A_52_P117408	0.809524	0.0076
1759	14	A_30_P01019318	A_52_P339742	0.785714	0.0096
1760	15	A_30_P01019318	A_52_P363843	0.714286	0.0241
1761	16	A_30_P01019318	A_52_P612251	0.928571	0.0003
1762	17	A_30_P01019318	A_55_P1959122	0.904762	0.001
1763	18	A_30_P01019318	A_55_P1968808	0.809524	0.0082
1764	19	A_30_P01019318	A_55_P1971571	0.833333	0.0055
1765	20	A_30_P01019318	A_55_P1985628	0.714286	0.0212
1766	21	A_30_P01019318	A_55_P1986183	0.785714	0.0125
1767	22	A_30_P01019318	A_55_P1989225	0.833333	0.0053
1768	23	A_30_P01019318	A_55_P1990032	0.761905	0.0145
1769	24	A_30_P01019318	A_55_P2003004	0.714286	0.0217
1770	25	A_30_P01019318	A_55_P2003883	0.714286	0.0228
1771	26	A_30_P01019318	A_55_P2008644	0.857143	0.0041
1772	27	A_30_P01019318	A_55_P2012314	0.880952	0.0019
1773	28	A_30_P01019318	A_55_P2014854	0.904762	0.0017
1774	29	A_30_P01019318	A_55_P2025443	0.738095	0.0186
1775	30	A_30_P01019318	A_55_P2032009	0.928571	0.0009
1776	31	A_30_P01019318	A_55_P2045040	0.738095	0.0183
1777	32	A_30_P01019318	A_55_P2062513	0.880952	0.0016
1778	33	A_30_P01019318	A_55_P2069891	0.809524	0.0074
1779	34	A_30_P01019318	A_55_P2075253	0.904762	0.0011
1780	35	A_30_P01019318	A_55_P2088755	0.761905	0.0155
1781	36	A_30_P01019318	A_55_P2089858	0.833333	0.0059
1782	37	A_30_P01019318	A_55_P2091616	0.738095	0.0205
1783	38	A_30_P01019318	A_55_P2093749	0.904762	0.0015
1784	39	A_30_P01019318	A_55_P2094044	0.833333	0.0044
1785	40	A_30_P01019318	A_55_P2097333	0.833333	0.0053
1786	41	A_30_P01019318	A_55_P2100272	0.738095	0.0163
1787	42	A_30_P01019318	A_55_P2101957	0.857143	0.0025
1788	43	A_30_P01019318	A_55_P2111698	0.97619	0.0001
1789	44	A_30_P01019318	A_55_P2113335	0.714286	0.0222
1790	45	A_30_P01019318	A_55_P2121484	0.761905	0.015
1791	46	A_30_P01019318	A_55_P2130114	0.904762	0.0005
1792	47	A_30_P01019318	A_55_P2139668	0.904762	0.0013
1793	48	A_30_P01019318	A_55_P2140764	0.761905	0.0152
1794	49	A_30_P01019318	A_55_P2144256	0.904762	0.0008
1795	50	A_30_P01019318	A_55_P2153961	0.761905	0.013
1796	51	A_30_P01019318	A_55_P2160663	0.714286	0.0245
1797	52	A_30_P01019318	A_55_P2162815	0.738095	0.0179
1798	53	A_30_P01019318	A_55_P2172693	0.857143	0.0045
1799	54	A_30_P01019318	A_55_P2201612	0.785714	0.0104
1800	55	A_30_P01019318	A_55_P2244941	0.809524	0.008
1801	56	A_30_P01019318	A_55_P2250391	0.761905	0.015
1802	57	A_30_P01019318	A_55_P2267696	0.97619	0
1803	58	A_30_P01019318	A_55_P2287260	0.833333	0.0047
1804	59	A_30_P01019318	A_55_P2361731	0.738095	0.019
1805	60	A_30_P01019318	A_65_P13209	0.761905	0.0127
1806	61	A_30_P01019318	A_66_P100840	0.738095	0.0164
1807	62	A_30_P01019318	A_66_P114705	0.904762	0.0012
1808	63	A_30_P01019318	A_66_P133119	0.833333	0.0053
1809	64	A_30_P01019318	A_51_P168630	-0.714286	0.0227
1810	65	A_30_P01019318	A_51_P204252	-0.714286	0.0226
1811	66	A_30_P01019318	A_51_P234847	-0.714286	0.0199
1812	67	A_30_P01019318	A_51_P351970	-0.833333	0.0052
1813	68	A_30_P01019318	A_51_P363214	-0.714286	0.0241
1814	69	A_30_P01019318	A_51_P374726	-0.785714	0.0119
1815	70	A_30_P01019318	A_51_P374991	-0.809524	0.0083
1816	71	A_30_P01019318	A_52_P1027170	-0.714286	0.0231
1817	72	A_30_P01019318	A_52_P172014	-0.738095	0.0167
1818	73	A_30_P01019318	A_52_P284958	-0.714286	0.0238
1819	74	A_30_P01019318	A_52_P387884	-0.738095	0.0181
1820	75	A_30_P01019318	A_52_P416327	-0.785714	0.0142
1821	76	A_30_P01019318	A_52_P53019	-0.761905	0.0147
1822	77	A_30_P01019318	A_52_P70854	-0.809524	0.0064
1823	78	A_30_P01019318	A_52_P98614	-0.809524	0.0064
1824	79	A_30_P01019318	A_55_P1962851	-0.857143	0.0035
1825	80	A_30_P01019318	A_55_P1972297	-0.904762	0.001
1826	81	A_30_P01019318	A_55_P2006862	-0.714286	0.0225
1827	82	A_30_P01019318	A_55_P2008016	-0.714286	0.023
1828	83	A_30_P01019318	A_55_P2019841	-0.952381	0.0001
1829	84	A_30_P01019318	A_55_P2053788	-0.928571	0.0006
1830	85	A_30_P01019318	A_55_P2078780	-0.785714	0.0128
1831	86	A_30_P01019318	A_55_P2093774	-0.761905	0.0134
1832	87	A_30_P01019318	A_55_P2110327	-0.761905	0.0144
1833	88	A_30_P01019318	A_55_P2110584	-0.857143	0.0035
1834	89	A_30_P01019318	A_55_P2158011	-0.904762	0.0014
1835	90	A_30_P01019318	A_55_P2178991	-0.857143	0.0036
1836	91	A_30_P01019318	A_55_P2179027	-0.928571	0.0006
1837	92	A_30_P01019318	A_55_P2205769	-0.738095	0.0175
1838	93	A_30_P01019318	A_55_P2322104	-0.761905	0.0143
1839	94	A_30_P01019318	A_55_P2422383	-0.714286	0.0246
1840	95	A_30_P01019318	A_66_P101620	-0.738095	0.0193
1841	1	A_30_P01019340	A_51_P167597	0.857143	0.005
1842	2	A_30_P01019340	A_51_P210732	0.761905	0.0128
1843	3	A_30_P01019340	A_51_P257841	0.785714	0.0106
1844	4	A_30_P01019340	A_51_P288541	0.738095	0.0175
1845	5	A_30_P01019340	A_51_P308912	0.785714	0.0087
1846	6	A_30_P01019340	A_51_P419103	0.761905	0.0148
1847	7	A_30_P01019340	A_52_P117408	0.880952	0.0026
1848	8	A_30_P01019340	A_52_P594302	0.833333	0.0049
1849	9	A_30_P01019340	A_52_P612251	0.785714	0.0107
1850	10	A_30_P01019340	A_55_P1966216	0.880952	0.0015
1851	11	A_30_P01019340	A_55_P1969949	0.904762	0.0009
1852	12	A_30_P01019340	A_55_P1973203	0.809524	0.0073
1853	13	A_30_P01019340	A_55_P1980550	0.714286	0.024
1854	14	A_30_P01019340	A_55_P1986183	0.714286	0.0224
1855	15	A_30_P01019340	A_55_P2014854	0.833333	0.006
1856	16	A_30_P01019340	A_55_P2025443	0.761905	0.015
1857	17	A_30_P01019340	A_55_P2032009	0.761905	0.0148
1858	18	A_30_P01019340	A_55_P2034385	0.738095	0.0163
1859	19	A_30_P01019340	A_55_P2062612	0.738095	0.0197
1860	20	A_30_P01019340	A_55_P2069891	0.738095	0.0168
1861	21	A_30_P01019340	A_55_P2072041	0.761905	0.0149
1862	22	A_30_P01019340	A_55_P2088755	0.833333	0.0044
1863	23	A_30_P01019340	A_55_P2091616	0.761905	0.0127
1864	24	A_30_P01019340	A_55_P2093749	0.761905	0.0142
1865	25	A_30_P01019340	A_55_P2094044	0.857143	0.0032
1866	26	A_30_P01019340	A_55_P2104343	0.761905	0.0138
1867	27	A_30_P01019340	A_55_P2105452	0.761905	0.0154
1868	28	A_30_P01019340	A_55_P2108813	0.714286	0.0217
1869	29	A_30_P01019340	A_55_P2117146	0.738095	0.0173
1870	30	A_30_P01019340	A_55_P2121794	0.738095	0.0174
1871	31	A_30_P01019340	A_55_P2175440	0.761905	0.0142
1872	32	A_30_P01019340	A_55_P2179348	0.809524	0.007
1873	33	A_30_P01019340	A_55_P2202598	0.809524	0.0088
1874	34	A_30_P01019340	A_55_P2244941	0.714286	0.0245
1875	35	A_30_P01019340	A_55_P2361731	0.761905	0.0136
1876	36	A_30_P01019340	A_55_P2431897	0.738095	0.0167
1877	37	A_30_P01019340	A_52_P172014	-1	0
1878	38	A_30_P01019340	A_52_P53019	-0.809524	0.0093
1879	39	A_30_P01019340	A_55_P1972297	-0.833333	0.0043
1880	40	A_30_P01019340	A_55_P2020612	-0.714286	0.0243
1881	41	A_30_P01019340	A_55_P2053788	-0.785714	0.0113
1882	42	A_30_P01019340	A_55_P2061333	-0.738095	0.0192
1883	43	A_30_P01019340	A_55_P2070539	-0.738095	0.0187
1884	44	A_30_P01019340	A_55_P2088183	-0.761905	0.0123
1885	45	A_30_P01019340	A_55_P2141817	-0.738095	0.0203
1886	46	A_30_P01019340	A_55_P2158011	-0.714286	0.0224
1887	47	A_30_P01019340	A_66_P105460	-0.761905	0.0151
1888	1	A_30_P01019373	A_51_P121607	0.714286	0.0224
1889	2	A_30_P01019373	A_51_P223724	0.714286	0.0231
1890	3	A_30_P01019373	A_51_P378903	0.714286	0.0246
1891	4	A_30_P01019373	A_52_P114962	0.809524	0.0081
1892	5	A_30_P01019373	A_55_P1980550	0.785714	0.0092
1893	6	A_30_P01019373	A_55_P1982467	0.785714	0.0113
1894	7	A_30_P01019373	A_55_P1985628	0.738095	0.0166
1895	8	A_30_P01019373	A_55_P2015635	0.857143	0.0035
1896	9	A_30_P01019373	A_55_P2017465	0.785714	0.0101
1897	10	A_30_P01019373	A_55_P2029031	0.904762	0.0012
1898	11	A_30_P01019373	A_55_P2031681	0.738095	0.0195
1899	12	A_30_P01019373	A_55_P2057430	0.833333	0.0055
1900	13	A_30_P01019373	A_55_P2069891	0.738095	0.0185
1901	14	A_30_P01019373	A_55_P2075253	0.738095	0.0182
1902	15	A_30_P01019373	A_55_P2088755	0.809524	0.0072
1903	16	A_30_P01019373	A_55_P2088846	0.785714	0.011
1904	17	A_30_P01019373	A_55_P2089665	0.857143	0.0045
1905	18	A_30_P01019373	A_55_P2090299	0.714286	0.0226
1906	19	A_30_P01019373	A_55_P2098782	0.761905	0.0142
1907	20	A_30_P01019373	A_55_P2104343	0.833333	0.0047
1908	21	A_30_P01019373	A_55_P2105239	0.833333	0.0058
1909	22	A_30_P01019373	A_55_P2123045	0.857143	0.0039
1910	23	A_30_P01019373	A_55_P2150580	0.880952	0.002
1911	24	A_30_P01019373	A_55_P2176898	0.857143	0.0045
1912	25	A_30_P01019373	A_55_P2247021	0.833333	0.005
1913	26	A_30_P01019373	A_55_P2431897	0.809524	0.007
1914	27	A_30_P01019373	A_66_P120970	0.857143	0.0045
1915	28	A_30_P01019373	A_66_P124975	0.785714	0.0114
1916	29	A_30_P01019373	A_66_P125538	0.714286	0.024
1917	30	A_30_P01019373	A_66_P133119	0.785714	0.0097
1918	31	A_30_P01019373	A_66_P135885	0.761905	0.0147
1919	32	A_30_P01019373	A_51_P363214	-0.857143	0.0033
1920	33	A_30_P01019373	A_55_P2039537	-0.738095	0.0214
1921	34	A_30_P01019373	A_55_P2061333	-0.809524	0.0067
1922	35	A_30_P01019373	A_55_P2113021	-0.738095	0.018
1923	36	A_30_P01019373	A_66_P105460	-0.785714	0.0097
1924	1	A_30_P01019564	A_51_P124126	-0.738095	0.0178
1925	2	A_30_P01019564	A_51_P167876	0.857143	0.0033
1926	3	A_30_P01019564	A_51_P223724	0.761905	0.0149
1927	4	A_30_P01019564	A_51_P237585	0.714286	0.0227
1928	5	A_30_P01019564	A_51_P273157	0.857143	0.0042
1929	6	A_30_P01019564	A_51_P378336	0.904762	0.0009
1930	7	A_30_P01019564	A_51_P386270	-0.809524	0.0079
1931	8	A_30_P01019564	A_51_P398833	0.809524	0.0076
1932	9	A_30_P01019564	A_51_P436521	-0.761905	0.0145
1933	10	A_30_P01019564	A_52_P112591	-0.809524	0.0075
1934	11	A_30_P01019564	A_52_P121015	0.928571	0.0005
1935	12	A_30_P01019564	A_52_P142520	0.952381	0.0004
1936	13	A_30_P01019564	A_52_P210909	0.904762	0.0009
1937	14	A_30_P01019564	A_52_P659270	0.904762	0.0019
1938	15	A_30_P01019564	A_52_P662711	-0.761905	0.0155
1939	16	A_30_P01019564	A_52_P684087	0.714286	0.0233
1940	17	A_30_P01019564	A_55_P1959384	-0.738095	0.0197
1941	18	A_30_P01019564	A_55_P1961180	0.833333	0.0047
1942	19	A_30_P01019564	A_55_P1973326	0.857143	0.0032
1943	20	A_30_P01019564	A_55_P1982467	0.785714	0.0102
1944	21	A_30_P01019564	A_55_P1982991	0.857143	0.003
1945	22	A_30_P01019564	A_55_P1999187	1	0
1946	23	A_30_P01019564	A_55_P2000978	0.738095	0.0176
1947	24	A_30_P01019564	A_55_P2004365	0.785714	0.0086
1948	25	A_30_P01019564	A_55_P2021699	0.928571	0.0006
1949	26	A_30_P01019564	A_55_P2042183	0.904762	0.0012
1950	27	A_30_P01019564	A_55_P2044257	0.833333	0.0055
1951	28	A_30_P01019564	A_55_P2109927	0.880952	0.0021
1952	29	A_30_P01019564	A_55_P2112564	0.833333	0.0069
1953	30	A_30_P01019564	A_55_P2125791	0.833333	0.0053
1954	31	A_30_P01019564	A_55_P2135203	0.761905	0.0144
1955	32	A_30_P01019564	A_55_P2148828	0.952381	0
1956	33	A_30_P01019564	A_55_P2164890	0.904762	0.0013
1957	34	A_30_P01019564	A_55_P2182523	0.952381	0.0007
1958	35	A_30_P01019564	A_55_P2207110	0.928571	0.0001
1959	36	A_30_P01019564	A_55_P2236291	-0.761905	0.014
1960	37	A_30_P01019564	A_55_P2273929	0.809524	0.0079
1961	38	A_30_P01019564	A_55_P2330173	0.928571	0.0006
1962	39	A_30_P01019564	A_66_P119812	0.761905	0.0142
1963	40	A_30_P01019564	A_66_P121193	0.738095	0.0172
1964	41	A_30_P01019564	A_66_P124975	0.785714	0.012
1965	42	A_30_P01019564	A_66_P129619	0.785714	0.0092
1966	43	A_30_P01019564	A_66_P133225	0.761905	0.0151
1967	44	A_30_P01019564	A_66_P140525	0.857143	0.0032
1968	45	A_30_P01019564	A_51_P126337	-0.785714	0.0101
1969	46	A_30_P01019564	A_51_P150653	-0.952381	0
1970	47	A_30_P01019564	A_51_P298615	-0.904762	0.0008
1971	48	A_30_P01019564	A_51_P392303	-0.809524	0.0082
1972	49	A_30_P01019564	A_51_P426270	-1	0
1973	50	A_30_P01019564	A_52_P236398	-0.857143	0.0038
1974	51	A_30_P01019564	A_52_P276955	-0.809524	0.0088
1975	52	A_30_P01019564	A_52_P422494	-0.761905	0.0133
1976	53	A_30_P01019564	A_55_P1964327	0.714286	0.0248
1977	54	A_30_P01019564	A_55_P1965659	-0.857143	0.0046
1978	55	A_30_P01019564	A_55_P1997225	-0.857143	0.0038
1979	56	A_30_P01019564	A_55_P2004536	-0.833333	0.0046
1980	57	A_30_P01019564	A_55_P2007500	-0.738095	0.019
1981	58	A_30_P01019564	A_55_P2015530	0.785714	0.0128
1982	59	A_30_P01019564	A_55_P2018116	0.761905	0.0151
1983	60	A_30_P01019564	A_55_P2088223	-0.761905	0.0138
1984	61	A_30_P01019564	A_55_P2092164	-0.833333	0.006
1985	62	A_30_P01019564	A_55_P2160181	0.809524	0.0085
1986	63	A_30_P01019564	A_55_P2174661	-0.761905	0.0125
1987	64	A_30_P01019564	A_65_P20433	-0.857143	0.0037
1988	65	A_30_P01019564	A_66_P110707	-0.833333	0.0043
1989	1	A_30_P01019579	A_51_P226962	-0.690476	0.0247
1990	2	A_30_P01019579	A_51_P237585	0.952381	0.0001
1991	3	A_30_P01019579	A_51_P288295	-0.880952	0.003
1992	4	A_30_P01019579	A_51_P391955	-0.833333	0.0052
1993	5	A_30_P01019579	A_52_P30641	-0.785714	0.0118
1994	6	A_30_P01019579	A_52_P613808	0.714286	0.0208
1995	7	A_30_P01019579	A_55_P1961180	0.785714	0.0118
1996	8	A_30_P01019579	A_55_P1977451	-0.904762	0.0009
1997	9	A_30_P01019579	A_55_P1979364	-0.880952	0.0022
1998	10	A_30_P01019579	A_55_P1989738	-0.880952	0.0034
[truncated: 17,408 more rows]

## Sheet: BALBc_Wk4
Table S4. Correlations between lncRNA and coding RNA expression in BALB/c and SPRET/EiJ mammary tissues after LDIR exposure.
Correlation #	Coding RNA #	Linc RNA	Coding RNA	correlation	p-value				Unique Linc RNA
1	1	A_30_P01017482	A_51_P121031	0.761905	0.0158				A_30_P01017482
2	2	A_30_P01017482	A_51_P132013	0.904762	0.001				A_30_P01017510
3	3	A_30_P01017482	A_51_P150678	0.809524	0.0078				A_30_P01017536
4	4	A_30_P01017482	A_51_P169445	-0.928571	0.0005				A_30_P01017567
5	5	A_30_P01017482	A_51_P175667	0.857143	0.0041				A_30_P01017593
6	6	A_30_P01017482	A_51_P193146	0.785714	0.0116				A_30_P01017652
7	7	A_30_P01017482	A_51_P208160	0.714286	0.0248				A_30_P01017759
8	8	A_30_P01017482	A_51_P209280	0.857143	0.0042				A_30_P01017768
9	9	A_30_P01017482	A_51_P235687	0.928571	0.0004				A_30_P01017772
10	10	A_30_P01017482	A_51_P261517	0.904762	0.0008				A_30_P01017842
11	11	A_30_P01017482	A_51_P265571	0.714286	0.0226				A_30_P01017882
12	12	A_30_P01017482	A_51_P288876	-0.809524	0.0082				A_30_P01017891
13	13	A_30_P01017482	A_51_P298837	0.809524	0.0078				A_30_P01017898
14	14	A_30_P01017482	A_51_P337675	0.714286	0.0223				A_30_P01017970
15	15	A_30_P01017482	A_51_P405476	0.904762	0.0009				A_30_P01018034
16	16	A_30_P01017482	A_51_P422625	0.952381	0				A_30_P01018145
17	17	A_30_P01017482	A_51_P430766	0.97619	0.0001				A_30_P01018174
18	18	A_30_P01017482	A_51_P455338	0.857143	0.003				A_30_P01018191
19	19	A_30_P01017482	A_51_P461779	0.785714	0.0105				A_30_P01018384
20	20	A_30_P01017482	A_51_P472867	0.738095	0.0184				A_30_P01018470
21	21	A_30_P01017482	A_51_P483511	0.738095	0.017				A_30_P01018521
22	22	A_30_P01017482	A_51_P483544	-0.738095	0.0198				A_30_P01018748
23	23	A_30_P01017482	A_51_P499838	0.714286	0.0209				A_30_P01018789
24	24	A_30_P01017482	A_51_P511151	0.761905	0.0117				A_30_P01018815
25	25	A_30_P01017482	A_51_P513568	0.857143	0.0041				A_30_P01018824
26	26	A_30_P01017482	A_51_P517695	0.904762	0.002				A_30_P01018835
27	27	A_30_P01017482	A_52_P157837	0.904762	0.0009				A_30_P01018854
28	28	A_30_P01017482	A_52_P161237	0.833333	0.0048				A_30_P01018941
29	29	A_30_P01017482	A_52_P186937	-0.714286	0.0238				A_30_P01018997
30	30	A_30_P01017482	A_52_P221588	0.785714	0.0109				A_30_P01019002
31	31	A_30_P01017482	A_52_P22617	0.833333	0.0035				A_30_P01019027
32	32	A_30_P01017482	A_52_P258617	0.952381	0.0003				A_30_P01019129
33	33	A_30_P01017482	A_52_P356204	0.809524	0.0078				A_30_P01019156
34	34	A_30_P01017482	A_52_P393738	0.833333	0.005				A_30_P01019163
35	35	A_30_P01017482	A_52_P412585	0.809524	0.0076				A_30_P01019199
36	36	A_30_P01017482	A_52_P464228	0.809524	0.0092				A_30_P01019244
37	37	A_30_P01017482	A_52_P577748	0.761905	0.0147				A_30_P01019276
38	38	A_30_P01017482	A_52_P607128	0.952381	0.0001				A_30_P01019348
39	39	A_30_P01017482	A_55_P1952618	0.880952	0.0019				A_30_P01019373
40	40	A_30_P01017482	A_55_P1952900	0.738095	0.0182				A_30_P01019433
41	41	A_30_P01017482	A_55_P1957173	0.880952	0.0014				A_30_P01019469
42	42	A_30_P01017482	A_55_P1960246	0.809524	0.0078				A_30_P01019561
43	43	A_30_P01017482	A_55_P1961943	0.904762	0.0017				A_30_P01019570
44	44	A_30_P01017482	A_55_P1966450	0.809524	0.0062				A_30_P01019576
45	45	A_30_P01017482	A_55_P1976212	0.738095	0.0188				A_30_P01019629
46	46	A_30_P01017482	A_55_P1977042	0.880952	0.0026				A_30_P01019663
47	47	A_30_P01017482	A_55_P1980486	0.880952	0.0024				A_30_P01019782
48	48	A_30_P01017482	A_55_P1981167	0.833333	0.0047				A_30_P01019807
49	49	A_30_P01017482	A_55_P1981195	-0.738095	0.0176				A_30_P01019842
50	50	A_30_P01017482	A_55_P1988202	0.904762	0.0009				A_30_P01019892
51	51	A_30_P01017482	A_55_P1990535	0.904762	0.0012				A_30_P01019936
52	52	A_30_P01017482	A_55_P1996746	0.738095	0.0197				A_30_P01020046
53	53	A_30_P01017482	A_55_P1997126	0.904762	0.0008				A_30_P01020059
54	54	A_30_P01017482	A_55_P1997525	0.714286	0.0236				A_30_P01020473
55	55	A_30_P01017482	A_55_P1997534	0.714286	0.0224				A_30_P01020503
56	56	A_30_P01017482	A_55_P1998843	0.785714	0.0109				A_30_P01020569
57	57	A_30_P01017482	A_55_P2003414	-0.833333	0.0058				A_30_P01020624
58	58	A_30_P01017482	A_55_P2003638	0.714286	0.0207				A_30_P01020652
59	59	A_30_P01017482	A_55_P2004786	0.857143	0.0047				A_30_P01020678
60	60	A_30_P01017482	A_55_P2006008	0.904762	0.0011				A_30_P01020682
61	61	A_30_P01017482	A_55_P2007646	0.880952	0.0023				A_30_P01020683
62	62	A_30_P01017482	A_55_P2009395	0.904762	0.0008				A_30_P01020753
63	63	A_30_P01017482	A_55_P2009940	0.809524	0.007				A_30_P01020784
64	64	A_30_P01017482	A_55_P2010301	0.738095	0.0163				A_30_P01020851
65	65	A_30_P01017482	A_55_P2012216	0.857143	0.0035				A_30_P01020866
66	66	A_30_P01017482	A_55_P2017914	0.714286	0.0234				A_30_P01020919
67	67	A_30_P01017482	A_55_P2018934	0.857143	0.0039				A_30_P01020985
68	68	A_30_P01017482	A_55_P2025937	0.904762	0.0004				A_30_P01021011
69	69	A_30_P01017482	A_55_P2028853	0.904762	0.001				A_30_P01021030
70	70	A_30_P01017482	A_55_P2029046	0.833333	0.0063				A_30_P01021048
71	71	A_30_P01017482	A_55_P2035509	0.857143	0.0036				A_30_P01021057
72	72	A_30_P01017482	A_55_P2045136	0.880952	0.0022				A_30_P01021182
73	73	A_30_P01017482	A_55_P2046709	0.738095	0.0169				A_30_P01021351
74	74	A_30_P01017482	A_55_P2047753	0.738095	0.0193				A_30_P01021437
75	75	A_30_P01017482	A_55_P2050360	0.714286	0.0203				A_30_P01021445
76	76	A_30_P01017482	A_55_P2050722	0.809524	0.0081				A_30_P01021505
77	77	A_30_P01017482	A_55_P2050932	0.785714	0.0106				A_30_P01021573
78	78	A_30_P01017482	A_55_P2054445	0.738095	0.0191				A_30_P01021597
79	79	A_30_P01017482	A_55_P2055834	0.761905	0.015				A_30_P01021601
80	80	A_30_P01017482	A_55_P2056719	0.761905	0.0138				A_30_P01021676
81	81	A_30_P01017482	A_55_P2056789	0.97619	0				A_30_P01021740
82	82	A_30_P01017482	A_55_P2057076	0.809524	0.0063				A_30_P01021770
83	83	A_30_P01017482	A_55_P2062774	0.904762	0.0017				A_30_P01021803
84	84	A_30_P01017482	A_55_P2063755	0.738095	0.0179				A_30_P01021824
85	85	A_30_P01017482	A_55_P2066230	0.952381	0.0003				A_30_P01021827
86	86	A_30_P01017482	A_55_P2081785	0.785714	0.0108				A_30_P01021838
87	87	A_30_P01017482	A_55_P2082319	0.952381	0.0001				A_30_P01021849
88	88	A_30_P01017482	A_55_P2085586	0.761905	0.0143				A_30_P01021884
89	89	A_30_P01017482	A_55_P2089804	0.904762	0.0011				A_30_P01021892
90	90	A_30_P01017482	A_55_P2091032	0.714286	0.0231				A_30_P01021900
91	91	A_30_P01017482	A_55_P2094489	0.904762	0.0009				A_30_P01022035
92	92	A_30_P01017482	A_55_P2100237	0.714286	0.0227				A_30_P01022066
93	93	A_30_P01017482	A_55_P2103249	0.880952	0.0023				A_30_P01022092
94	94	A_30_P01017482	A_55_P2107577	0.833333	0.0048				A_30_P01022126
95	95	A_30_P01017482	A_55_P2107632	0.833333	0.0056				A_30_P01022132
96	96	A_30_P01017482	A_55_P2109407	0.714286	0.0226				A_30_P01022184
97	97	A_30_P01017482	A_55_P2113857	0.738095	0.0176				A_30_P01022203
98	98	A_30_P01017482	A_55_P2115198	0.809524	0.0089				A_30_P01022244
99	99	A_30_P01017482	A_55_P2115401	0.904762	0.0015				A_30_P01022255
100	100	A_30_P01017482	A_55_P2116674	-0.738095	0.0191				A_30_P01022434
101	101	A_30_P01017482	A_55_P2118537	0.833333	0.0054				A_30_P01022452
102	102	A_30_P01017482	A_55_P2121623	0.761905	0.015				A_30_P01022458
103	103	A_30_P01017482	A_55_P2122604	0.880952	0.0028				A_30_P01022474
104	104	A_30_P01017482	A_55_P2122605	0.857143	0.003				A_30_P01022499
105	105	A_30_P01017482	A_55_P2123283	0.714286	0.0234				A_30_P01022549
106	106	A_30_P01017482	A_55_P2126502	-0.761905	0.0144				A_30_P01022550
107	107	A_30_P01017482	A_55_P2127385	0.880952	0.002				A_30_P01022598
108	108	A_30_P01017482	A_55_P2127854	-0.809524	0.0077				A_30_P01022630
109	109	A_30_P01017482	A_55_P2128853	0.880952	0.0022				A_30_P01022723
110	110	A_30_P01017482	A_55_P2132549	0.904762	0.0018				A_30_P01022825
111	111	A_30_P01017482	A_55_P2136036	0.785714	0.0108				A_30_P01022827
112	112	A_30_P01017482	A_55_P2147245	0.761905	0.0135				A_30_P01022881
113	113	A_30_P01017482	A_55_P2152472	-0.761905	0.0125				A_30_P01022896
114	114	A_30_P01017482	A_55_P2156006	0.738095	0.0175				A_30_P01022924
115	115	A_30_P01017482	A_55_P2157008	0.880952	0.0024				A_30_P01022973
116	116	A_30_P01017482	A_55_P2159969	0.714286	0.0208				A_30_P01023048
117	117	A_30_P01017482	A_55_P2162792	0.904762	0.002				A_30_P01023068
118	118	A_30_P01017482	A_55_P2167728	-0.738095	0.0176				A_30_P01023134
119	119	A_30_P01017482	A_55_P2169569	0.714286	0.0244				A_30_P01023143
120	120	A_30_P01017482	A_55_P2169669	0.714286	0.0219				A_30_P01023147
121	121	A_30_P01017482	A_55_P2173011	0.785714	0.0121				A_30_P01023174
122	122	A_30_P01017482	A_55_P2173210	0.761905	0.0131				A_30_P01023217
123	123	A_30_P01017482	A_55_P2174661	0.809524	0.0056				A_30_P01023250
124	124	A_30_P01017482	A_55_P2179309	0.904762	0.0014				A_30_P01023338
125	125	A_30_P01017482	A_55_P2181738	0.952381	0.0001				A_30_P01023343
126	126	A_30_P01017482	A_55_P2185605	0.928571	0.0004				A_30_P01023353
127	127	A_30_P01017482	A_55_P2227355	0.904762	0.0016				A_30_P01023365
128	128	A_30_P01017482	A_55_P2378030	0.738095	0.018				A_30_P01023392
129	129	A_30_P01017482	A_55_P2380428	-0.785714	0.0102				A_30_P01023443
130	130	A_30_P01017482	A_55_P2381921	-0.761905	0.0149				A_30_P01023508
131	131	A_30_P01017482	A_66_P101903	0.714286	0.0243				A_30_P01023527
132	132	A_30_P01017482	A_66_P104119	0.833333	0.0051				A_30_P01023625
133	133	A_30_P01017482	A_66_P105689	0.785714	0.01				A_30_P01023632
134	134	A_30_P01017482	A_66_P106388	0.857143	0.0036				A_30_P01023639
135	135	A_30_P01017482	A_66_P107484	0.857143	0.0044				A_30_P01023717
136	136	A_30_P01017482	A_66_P108088	0.97619	0.0001				A_30_P01023749
137	137	A_30_P01017482	A_66_P114782	0.761905	0.0128				A_30_P01023820
138	138	A_30_P01017482	A_66_P116683	0.904762	0.001				A_30_P01023823
139	139	A_30_P01017482	A_66_P119968	0.785714	0.0124				A_30_P01023856
140	140	A_30_P01017482	A_66_P121086	0.904762	0.0009				A_30_P01023921
141	141	A_30_P01017482	A_66_P132295	0.714286	0.0248				A_30_P01023937
142	142	A_30_P01017482	A_66_P136064	0.761905	0.0126				A_30_P01023953
143	143	A_30_P01017482	A_51_P114462	0.761905	0.013				A_30_P01023960
144	144	A_30_P01017482	A_51_P118132	0.785714	0.0111				A_30_P01024061
145	145	A_30_P01017482	A_51_P157802	-0.833333	0.0056				A_30_P01024163
146	146	A_30_P01017482	A_51_P230439	-0.904762	0.0009				A_30_P01024275
147	147	A_30_P01017482	A_51_P256224	-0.738095	0.0177				A_30_P01024303
148	148	A_30_P01017482	A_51_P362176	-0.714286	0.0227				A_30_P01024325
149	149	A_30_P01017482	A_51_P365318	-0.880952	0.0026				A_30_P01024430
150	150	A_30_P01017482	A_51_P379083	-0.809524	0.0072				A_30_P01024432
151	151	A_30_P01017482	A_51_P424959	-0.857143	0.004				A_30_P01024618
152	152	A_30_P01017482	A_52_P1042732	0.833333	0.0051				A_30_P01024627
153	153	A_30_P01017482	A_52_P193161	0.809524	0.0082				A_30_P01024661
154	154	A_30_P01017482	A_52_P200610	0.785714	0.0106				A_30_P01024702
155	155	A_30_P01017482	A_52_P20765	-0.97619	0.0001				A_30_P01024705
156	156	A_30_P01017482	A_52_P322421	-0.833333	0.0067				A_30_P01024731
157	157	A_30_P01017482	A_52_P350344	0.761905	0.0151				A_30_P01024828
158	158	A_30_P01017482	A_52_P480266	-0.809524	0.0062				A_30_P01024830
159	159	A_30_P01017482	A_52_P590625	0.857143	0.0033				A_30_P01024838
160	160	A_30_P01017482	A_52_P644114	0.809524	0.0078				A_30_P01024882
161	161	A_30_P01017482	A_52_P932421	-0.880952	0.0019				A_30_P01024947
162	162	A_30_P01017482	A_55_P1957618	-0.809524	0.0083				A_30_P01024950
163	163	A_30_P01017482	A_55_P1966690	-0.857143	0.004				A_30_P01024966
164	164	A_30_P01017482	A_55_P1971154	-0.97619	0				A_30_P01024982
165	165	A_30_P01017482	A_55_P1972710	-0.904762	0.0011				A_30_P01024993
166	166	A_30_P01017482	A_55_P1985788	-0.761905	0.0136				A_30_P01024995
167	167	A_30_P01017482	A_55_P1989728	-0.833333	0.0059				A_30_P01025033
168	168	A_30_P01017482	A_55_P1998339	-0.738095	0.0183				A_30_P01025059
169	169	A_30_P01017482	A_55_P1999800	-0.738095	0.0168				A_30_P01025099
170	170	A_30_P01017482	A_55_P2006808	-0.809524	0.0089				A_30_P01025105
171	171	A_30_P01017482	A_55_P2009905	-0.904762	0.0013				A_30_P01025142
172	172	A_30_P01017482	A_55_P2022629	-0.904762	0.0007				A_30_P01025212
173	173	A_30_P01017482	A_55_P2027852	-0.714286	0.0217				A_30_P01025315
174	174	A_30_P01017482	A_55_P2030160	-0.714286	0.0225				A_30_P01025341
175	175	A_30_P01017482	A_55_P2031611	0.738095	0.0173				A_30_P01025357
176	176	A_30_P01017482	A_55_P2039038	-0.904762	0.0009				A_30_P01025421
177	177	A_30_P01017482	A_55_P2049261	-0.880952	0.0018				A_30_P01025449
178	178	A_30_P01017482	A_55_P2050169	-0.880952	0.0024				A_30_P01025460
179	179	A_30_P01017482	A_55_P2055742	-0.785714	0.0118				A_30_P01025575
180	180	A_30_P01017482	A_55_P2077153	-0.809524	0.0085				A_30_P01025645
181	181	A_30_P01017482	A_55_P2077988	-0.880952	0.0025				A_30_P01025681
182	182	A_30_P01017482	A_55_P2084890	-0.833333	0.005				A_30_P01025697
183	183	A_30_P01017482	A_55_P2111163	-0.833333	0.0049				A_30_P01025711
184	184	A_30_P01017482	A_55_P2113375	-0.785714	0.0116				A_30_P01025712
185	185	A_30_P01017482	A_55_P2114651	-0.761905	0.0144				A_30_P01025722
186	186	A_30_P01017482	A_55_P2126281	0.761905	0.0141				A_30_P01025730
187	187	A_30_P01017482	A_55_P2129077	-0.809524	0.007				A_30_P01025782
188	188	A_30_P01017482	A_55_P2134591	-0.97619	0				A_30_P01025816
189	189	A_30_P01017482	A_55_P2166622	-0.738095	0.0173				A_30_P01025894
190	190	A_30_P01017482	A_55_P2194958	-0.714286	0.0236				A_30_P01025904
191	191	A_30_P01017482	A_55_P2211937	-0.761905	0.0147				A_30_P01026020
192	192	A_30_P01017482	A_55_P2256586	-0.928571	0.0008				A_30_P01026121
193	193	A_30_P01017482	A_55_P2316612	-0.904762	0.0011				A_30_P01026158
194	194	A_30_P01017482	A_55_P2349243	-0.880952	0.0022				A_30_P01026257
195	195	A_30_P01017482	A_55_P2365902	-0.833333	0.0055				A_30_P01026270
196	196	A_30_P01017482	A_55_P2375121	-0.738095	0.0175				A_30_P01026312
197	197	A_30_P01017482	A_55_P2416494	-0.761905	0.0139				A_30_P01026323
198	198	A_30_P01017482	A_66_P131433	-0.880952	0.0019				A_30_P01026413
199	199	A_30_P01017482	A_66_P136193	-0.738095	0.0176				A_30_P01026696
200	1	A_30_P01017510	A_51_P111962	0.857143	0.0036				A_30_P01026698
201	2	A_30_P01017510	A_51_P161021	0.809524	0.0075				A_30_P01026717
202	3	A_30_P01017510	A_51_P169745	0.928571	0.0006				A_30_P01026789
203	4	A_30_P01017510	A_51_P175667	0.904762	0.0011				A_30_P01026867
204	5	A_30_P01017510	A_51_P179504	0.833333	0.005				A_30_P01026955
205	6	A_30_P01017510	A_51_P208160	0.97619	0				A_30_P01026968
206	7	A_30_P01017510	A_51_P209280	0.738095	0.0206				A_30_P01026990
207	8	A_30_P01017510	A_51_P225224	0.857143	0.0037				A_30_P01027011
208	9	A_30_P01017510	A_51_P227222	0.809524	0.0064				A_30_P01027013
209	10	A_30_P01017510	A_51_P232649	0.833333	0.0049				A_30_P01027096
210	11	A_30_P01017510	A_51_P235687	0.738095	0.0184				A_30_P01027104
211	12	A_30_P01017510	A_51_P282557	0.785714	0.0112				A_30_P01027120
212	13	A_30_P01017510	A_51_P295085	0.738095	0.0198				A_30_P01027163
213	14	A_30_P01017510	A_51_P309556	0.857143	0.0046				A_30_P01027265
214	15	A_30_P01017510	A_51_P405476	0.833333	0.0057				A_30_P01027318
215	16	A_30_P01017510	A_51_P422625	0.761905	0.0121				A_30_P01027422
216	17	A_30_P01017510	A_51_P441426	0.880952	0.0018				A_30_P01027443
217	18	A_30_P01017510	A_51_P455338	0.904762	0.0008				A_30_P01027499
218	19	A_30_P01017510	A_51_P461779	0.785714	0.0093				A_30_P01027521
219	20	A_30_P01017510	A_51_P464703	0.761905	0.0149				A_30_P01027527
220	21	A_30_P01017510	A_51_P468260	0.738095	0.0191				A_30_P01027543
221	22	A_30_P01017510	A_51_P486719	0.857143	0.0032				A_30_P01027572
222	23	A_30_P01017510	A_51_P517695	0.785714	0.0119				A_30_P01027577
223	24	A_30_P01017510	A_52_P157837	0.785714	0.0107				A_30_P01027729
224	25	A_30_P01017510	A_52_P161237	0.714286	0.0237				A_30_P01027741
225	26	A_30_P01017510	A_52_P22617	0.880952	0.0021				A_30_P01027773
226	27	A_30_P01017510	A_52_P31641	0.833333	0.0047				A_30_P01027855
227	28	A_30_P01017510	A_52_P320261	0.785714	0.0108				A_30_P01027905
228	29	A_30_P01017510	A_52_P333063	0.904762	0.0009				A_30_P01027960
229	30	A_30_P01017510	A_52_P345261	0.714286	0.0211				A_30_P01027978
230	31	A_30_P01017510	A_52_P393738	0.904762	0.0016				A_30_P01028005
231	32	A_30_P01017510	A_52_P464228	0.761905	0.0116				A_30_P01028029
232	33	A_30_P01017510	A_52_P469789	0.833333	0.0062				A_30_P01028074
233	34	A_30_P01017510	A_52_P494564	0.833333	0.0052				A_30_P01028110
234	35	A_30_P01017510	A_52_P520607	0.738095	0.0202				A_30_P01028114
235	36	A_30_P01017510	A_55_P1953823	0.928571	0.0006				A_30_P01028117
236	37	A_30_P01017510	A_55_P1960246	0.761905	0.0145				A_30_P01028118
237	38	A_30_P01017510	A_55_P1961943	0.761905	0.0152				A_30_P01028249
238	39	A_30_P01017510	A_55_P1966755	0.952381	0.0002				A_30_P01028257
239	40	A_30_P01017510	A_55_P1975166	0.785714	0.0123				A_30_P01028293
240	41	A_30_P01017510	A_55_P1979753	0.785714	0.0124				A_30_P01028357
241	42	A_30_P01017510	A_55_P1980242	0.738095	0.0199				A_30_P01028402
242	43	A_30_P01017510	A_55_P1980486	0.880952	0.0029				A_30_P01028502
243	44	A_30_P01017510	A_55_P1981167	0.785714	0.0109				A_30_P01028596
244	45	A_30_P01017510	A_55_P1988202	0.809524	0.0075				A_30_P01028603
245	46	A_30_P01017510	A_55_P1988310	0.904762	0.0007				A_30_P01028616
246	47	A_30_P01017510	A_55_P1990535	0.785714	0.0116				A_30_P01028691
247	48	A_30_P01017510	A_55_P1994862	0.785714	0.0094				A_30_P01028704
248	49	A_30_P01017510	A_55_P1995104	0.809524	0.0064				A_30_P01028744
249	50	A_30_P01017510	A_55_P1997534	0.880952	0.0026				A_30_P01028852
250	51	A_30_P01017510	A_55_P1998843	0.857143	0.0045				A_30_P01028879
251	52	A_30_P01017510	A_55_P2000688	0.785714	0.0098				A_30_P01028972
252	53	A_30_P01017510	A_55_P2002727	0.714286	0.0219				A_30_P01029073
253	54	A_30_P01017510	A_55_P2003497	0.785714	0.0116				A_30_P01029092
254	55	A_30_P01017510	A_55_P2003638	0.738095	0.0193				A_30_P01029204
255	56	A_30_P01017510	A_55_P2004786	0.904762	0.001				A_30_P01029275
256	57	A_30_P01017510	A_55_P2007646	0.809524	0.0067				A_30_P01029423
257	58	A_30_P01017510	A_55_P2009940	0.761905	0.0142				A_30_P01029427
258	59	A_30_P01017510	A_55_P2012702	0.761905	0.0147				A_30_P01029460
259	60	A_30_P01017510	A_55_P2013038	0.738095	0.0172				A_30_P01029479
260	61	A_30_P01017510	A_55_P2018934	0.904762	0.0007				A_30_P01029496
261	62	A_30_P01017510	A_55_P2026139	0.928571	0.0002				A_30_P01029510
262	63	A_30_P01017510	A_55_P2026458	0.97619	0				A_30_P01029521
263	64	A_30_P01017510	A_55_P2026460	0.714286	0.0217				A_30_P01029548
264	65	A_30_P01017510	A_55_P2028542	0.761905	0.0125				A_30_P01029550
265	66	A_30_P01017510	A_55_P2030229	0.833333	0.0053				A_30_P01029619
266	67	A_30_P01017510	A_55_P2032009	0.857143	0.0027				A_30_P01029628
267	68	A_30_P01017510	A_55_P2032355	0.738095	0.0181				A_30_P01029629
268	69	A_30_P01017510	A_55_P2034320	0.928571	0.0007				A_30_P01029670
269	70	A_30_P01017510	A_55_P2039684	0.785714	0.0112				A_30_P01029699
270	71	A_30_P01017510	A_55_P2040081	0.761905	0.0132				A_30_P01029748
271	72	A_30_P01017510	A_55_P2041976	0.904762	0.0012				A_30_P01029832
272	73	A_30_P01017510	A_55_P2045136	0.714286	0.0236				A_30_P01029836
273	74	A_30_P01017510	A_55_P2049944	0.761905	0.014				A_30_P01029842
274	75	A_30_P01017510	A_55_P2050722	0.761905	0.0142				A_30_P01029848
275	76	A_30_P01017510	A_55_P2055834	0.952381	0.0003				A_30_P01029874
276	77	A_30_P01017510	A_55_P2057076	0.928571	0.0013				A_30_P01029919
277	78	A_30_P01017510	A_55_P2062774	0.809524	0.0069				A_30_P01029935
278	79	A_30_P01017510	A_55_P2064523	0.785714	0.0114				A_30_P01029986
279	80	A_30_P01017510	A_55_P2064702	0.833333	0.0047				A_30_P01030018
280	81	A_30_P01017510	A_55_P2066727	0.738095	0.0168				A_30_P01030062
281	82	A_30_P01017510	A_55_P2067747	0.880952	0.0027				A_30_P01030065
282	83	A_30_P01017510	A_55_P2070492	0.761905	0.0155				A_30_P01030070
283	84	A_30_P01017510	A_55_P2071940	0.928571	0.0006				A_30_P01030110
284	85	A_30_P01017510	A_55_P2075874	0.714286	0.0215				A_30_P01030115
285	86	A_30_P01017510	A_55_P2080074	0.880952	0.0027				A_30_P01030133
286	87	A_30_P01017510	A_55_P2082319	0.785714	0.01				A_30_P01030232
287	88	A_30_P01017510	A_55_P2083186	0.833333	0.0065				A_30_P01030250
288	89	A_30_P01017510	A_55_P2085586	0.833333	0.0065				A_30_P01030361
289	90	A_30_P01017510	A_55_P2086381	0.928571	0.0009				A_30_P01030477
290	91	A_30_P01017510	A_55_P2089804	0.785714	0.0123				A_30_P01030513
291	92	A_30_P01017510	A_55_P2094489	0.785714	0.0103				A_30_P01030641
292	93	A_30_P01017510	A_55_P2103249	0.880952	0.0038				A_30_P01030686
293	94	A_30_P01017510	A_55_P2103937	0.738095	0.0186				A_30_P01030721
294	95	A_30_P01017510	A_55_P2107437	0.904762	0.0016				A_30_P01030800
295	96	A_30_P01017510	A_55_P2107577	0.904762	0.0015				A_30_P01030851
296	97	A_30_P01017510	A_55_P2107632	0.714286	0.023				A_30_P01030993
297	98	A_30_P01017510	A_55_P2109407	0.880952	0.002				A_30_P01031004
298	99	A_30_P01017510	A_55_P2111698	0.833333	0.0056				A_30_P01031005
299	100	A_30_P01017510	A_55_P2113330	0.738095	0.0176				A_30_P01031046
300	101	A_30_P01017510	A_55_P2115057	0.928571	0.0008				A_30_P01031089
301	102	A_30_P01017510	A_55_P2115198	0.928571	0.0008				A_30_P01031100
302	103	A_30_P01017510	A_55_P2115401	0.833333	0.0043				A_30_P01031231
303	104	A_30_P01017510	A_55_P2119287	0.809524	0.007				A_30_P01031275
304	105	A_30_P01017510	A_55_P2120968	0.761905	0.0153				A_30_P01031283
305	106	A_30_P01017510	A_55_P2121623	0.857143	0.0051				A_30_P01031298
306	107	A_30_P01017510	A_55_P2122604	0.809524	0.0061				A_30_P01031310
307	108	A_30_P01017510	A_55_P2122605	0.904762	0.0021				A_30_P01031346
308	109	A_30_P01017510	A_55_P2122653	0.904762	0.0013				A_30_P01031457
309	110	A_30_P01017510	A_55_P2122884	0.738095	0.0192				A_30_P01031526
310	111	A_30_P01017510	A_55_P2123283	0.880952	0.0023				A_30_P01031628
311	112	A_30_P01017510	A_55_P2123519	0.904762	0.0011				A_30_P01031844
312	113	A_30_P01017510	A_55_P2127112	0.738095	0.0158				A_30_P01031903
313	114	A_30_P01017510	A_55_P2127385	0.809524	0.0069				A_30_P01031965
314	115	A_30_P01017510	A_55_P2136036	0.809524	0.0076				A_30_P01032003
315	116	A_30_P01017510	A_55_P2138217	0.880952	0.0027				A_30_P01032066
316	117	A_30_P01017510	A_55_P2142650	0.833333	0.0064				A_30_P01032099
317	118	A_30_P01017510	A_55_P2149670	0.880952	0.0024				A_30_P01032156
318	119	A_30_P01017510	A_55_P2155843	0.714286	0.0231				A_30_P01032158
319	120	A_30_P01017510	A_55_P2156006	0.714286	0.0209				A_30_P01032198
320	121	A_30_P01017510	A_55_P2157008	0.809524	0.0086				A_30_P01032217
321	122	A_30_P01017510	A_55_P2161214	0.904762	0.0008				A_30_P01032247
322	123	A_30_P01017510	A_55_P2162807	0.809524	0.0081				A_30_P01032253
323	124	A_30_P01017510	A_55_P2163348	0.738095	0.0177				A_30_P01032289
324	125	A_30_P01017510	A_55_P2166960	0.857143	0.0034				A_30_P01032312
325	126	A_30_P01017510	A_55_P2169569	0.738095	0.0198				A_30_P01032349
326	127	A_30_P01017510	A_55_P2172663	0.833333	0.0056				A_30_P01032378
327	128	A_30_P01017510	A_55_P2173210	0.738095	0.0188				A_30_P01032413
328	129	A_30_P01017510	A_55_P2174661	0.761905	0.0122				A_30_P01032463
329	130	A_30_P01017510	A_55_P2177463	0.761905	0.0136				A_30_P01032498
330	131	A_30_P01017510	A_55_P2177633	0.904762	0.001				A_30_P01032554
331	132	A_30_P01017510	A_55_P2179676	0.714286	0.0236				A_30_P01032585
332	133	A_30_P01017510	A_55_P2180091	0.761905	0.0153				A_30_P01032611
333	134	A_30_P01017510	A_55_P2185875	0.809524	0.0079				A_30_P01032694
334	135	A_30_P01017510	A_55_P2186802	0.904762	0.0015				A_30_P01032744
335	136	A_30_P01017510	A_55_P2213418	0.928571	0.0004				A_30_P01032751
336	137	A_30_P01017510	A_55_P2229791	0.857143	0.0033				A_30_P01032772
337	138	A_30_P01017510	A_55_P2256019	0.880952	0.0031				A_30_P01032815
338	139	A_30_P01017510	A_66_P100496	0.761905	0.0121				A_30_P01032822
339	140	A_30_P01017510	A_66_P101366	0.738095	0.0196				A_30_P01032961
340	141	A_30_P01017510	A_66_P103894	0.785714	0.0111				A_30_P01033019
341	142	A_30_P01017510	A_66_P104119	0.714286	0.0232				A_30_P01033050
342	143	A_30_P01017510	A_66_P105689	0.904762	0.001				A_30_P01033117
343	144	A_30_P01017510	A_66_P108214	0.714286	0.0219				A_30_P01033146
344	145	A_30_P01017510	A_66_P113008	0.880952	0.0027				A_30_P01033157
345	146	A_30_P01017510	A_66_P114782	0.928571	0.0004				A_30_P01033235
346	147	A_30_P01017510	A_66_P116683	0.785714	0.0094				A_30_P01033267
347	148	A_30_P01017510	A_66_P118059	0.880952	0.0035				A_30_P01033284
348	149	A_30_P01017510	A_66_P119968	0.857143	0.0043				A_30_P01033326
349	150	A_30_P01017510	A_66_P121086	0.785714	0.0114				A_30_P01033372
350	151	A_30_P01017510	A_66_P132295	0.97619	0				A_30_P01033387
351	152	A_30_P01017510	A_66_P135452	0.857143	0.004				A_30_P01033394
352	153	A_30_P01017510	A_51_P146044	-0.880952	0.002				A_30_P01033463
353	154	A_30_P01017510	A_51_P200610	-0.97619	0				A_30_P01033503
354	155	A_30_P01017510	A_51_P215559	-0.714286	0.0242				A_30_P01033532
355	156	A_30_P01017510	A_51_P230439	-0.785714	0.0118				A_30_P01033571
356	157	A_30_P01017510	A_51_P256224	-0.714286	0.0225				A_30_P01033615
357	158	A_30_P01017510	A_51_P266077	-0.880952	0.0023				A_30_P01033671
358	159	A_30_P01017510	A_51_P270904	-0.761905	0.0145				A_30_P01017472
359	160	A_30_P01017510	A_51_P288916	-0.952381	0.0002				A_30_P01017739
360	161	A_30_P01017510	A_51_P362176	-0.97619	0				A_30_P01017965
361	162	A_30_P01017510	A_51_P365318	-0.809524	0.0058				A_30_P01018031
362	163	A_30_P01017510	A_51_P424959	-0.714286	0.024				A_30_P01018083
363	164	A_30_P01017510	A_51_P428483	-0.952381	0.0003				A_30_P01018502
364	165	A_30_P01017510	A_51_P492897	-0.904762	0.0014				A_30_P01018735
365	166	A_30_P01017510	A_51_P494125	-0.785714	0.0108				A_30_P01018936
366	167	A_30_P01017510	A_52_P14444	-0.857143	0.0049				A_30_P01018962
367	168	A_30_P01017510	A_52_P20765	-0.738095	0.0197				A_30_P01019037
368	169	A_30_P01017510	A_52_P227267	-0.761905	0.0149				A_30_P01019238
369	170	A_30_P01017510	A_52_P283501	-0.809524	0.0065				A_30_P01019406
370	171	A_30_P01017510	A_52_P322421	-0.904762	0.001				A_30_P01019535
371	172	A_30_P01017510	A_52_P35377	-0.904762	0.001				A_30_P01019596
372	173	A_30_P01017510	A_52_P374983	-0.857143	0.0047				A_30_P01019706
373	174	A_30_P01017510	A_52_P378968	-0.785714	0.0126				A_30_P01019709
374	175	A_30_P01017510	A_52_P435561	-0.904762	0.0013				A_30_P01019915
375	176	A_30_P01017510	A_52_P468683	-0.809524	0.0073				A_30_P01019985
376	177	A_30_P01017510	A_52_P480266	-0.833333	0.0035				A_30_P01020025
377	178	A_30_P01017510	A_52_P491569	-0.785714	0.0093				A_30_P01020071
378	179	A_30_P01017510	A_52_P89335	-0.714286	0.0224				A_30_P01020131
379	180	A_30_P01017510	A_52_P932421	-0.714286	0.0227				A_30_P01020152
380	181	A_30_P01017510	A_55_P1966690	-0.857143	0.004				A_30_P01020231
381	182	A_30_P01017510	A_55_P1970105	-0.761905	0.0143				A_30_P01020465
382	183	A_30_P01017510	A_55_P1972710	-0.785714	0.0114				A_30_P01020568
383	184	A_30_P01017510	A_55_P1978028	-0.833333	0.0049				A_30_P01021244
384	185	A_30_P01017510	A_55_P1985788	-0.833333	0.0051				A_30_P01021593
385	186	A_30_P01017510	A_55_P1989728	-0.785714	0.0129				A_30_P01021642
386	187	A_30_P01017510	A_55_P2000201	-0.952381	0.0006				A_30_P01021768
387	188	A_30_P01017510	A_55_P2001486	-0.738095	0.0174				A_30_P01021799
388	189	A_30_P01017510	A_55_P2016459	-0.738095	0.0169				A_30_P01021943
389	190	A_30_P01017510	A_55_P2022629	-0.785714	0.0105				A_30_P01021956
390	191	A_30_P01017510	A_55_P2036220	-0.857143	0.0026				A_30_P01022168
391	192	A_30_P01017510	A_55_P2039038	-0.785714	0.0113				A_30_P01022310
392	193	A_30_P01017510	A_55_P2049261	-0.738095	0.0195				A_30_P01022417
393	194	A_30_P01017510	A_55_P2050169	-0.833333	0.0059				A_30_P01022571
394	195	A_30_P01017510	A_55_P2071354	-0.833333	0.0057				A_30_P01022631
395	196	A_30_P01017510	A_55_P2077153	-0.833333	0.006				A_30_P01022695
396	197	A_30_P01017510	A_55_P2077988	-0.714286	0.0228				A_30_P01022965
397	198	A_30_P01017510	A_55_P2084890	-0.785714	0.0108				A_30_P01022994
398	199	A_30_P01017510	A_55_P2101920	-0.97619	0				A_30_P01023398
399	200	A_30_P01017510	A_55_P2103541	-0.785714	0.0113				A_30_P01023480
400	201	A_30_P01017510	A_55_P2109857	-0.761905	0.0119				A_30_P01023489
401	202	A_30_P01017510	A_55_P2111163	-0.785714	0.0108				A_30_P01023572
402	203	A_30_P01017510	A_55_P2113375	-0.785714	0.0117				A_30_P01023579
403	204	A_30_P01017510	A_55_P2119917	-0.809524	0.0083				A_30_P01023620
404	205	A_30_P01017510	A_55_P2121608	-0.785714	0.0102				A_30_P01023711
405	206	A_30_P01017510	A_55_P2121613	-0.809524	0.0081				A_30_P01023736
406	207	A_30_P01017510	A_55_P2280868	-0.785714	0.0085				A_30_P01023776
407	208	A_30_P01017510	A_55_P2316612	-0.785714	0.0111				A_30_P01023790
408	209	A_30_P01017510	A_55_P2329487	-0.785714	0.0092				A_30_P01024363
409	210	A_30_P01017510	A_55_P2347529	-0.785714	0.0092				A_30_P01024434
410	211	A_30_P01017510	A_55_P2349243	-0.714286	0.022				A_30_P01024458
411	212	A_30_P01017510	A_55_P2365902	-0.785714	0.0122				A_30_P01024478
412	213	A_30_P01017510	A_55_P2381429	-0.714286	0.0245				A_30_P01024482
413	214	A_30_P01017510	A_55_P2416494	-0.761905	0.0145				A_30_P01024606
414	215	A_30_P01017510	A_65_P17869	-0.714286	0.0218				A_30_P01024692
415	216	A_30_P01017510	A_66_P109941	-0.857143	0.0035				A_30_P01024744
416	217	A_30_P01017510	A_66_P131433	-0.809524	0.0079				A_30_P01024945
417	218	A_30_P01017510	A_66_P136193	-0.761905	0.014				A_30_P01025066
418	1	A_30_P01017536	A_51_P111962	0.833333	0.005				A_30_P01025161
419	2	A_30_P01017536	A_51_P169745	0.880952	0.0024				A_30_P01025399
420	3	A_30_P01017536	A_51_P175667	0.761905	0.0149				A_30_P01025522
421	4	A_30_P01017536	A_51_P179504	0.761905	0.013				A_30_P01025604
422	5	A_30_P01017536	A_51_P208160	0.880952	0.0017				A_30_P01025657
423	6	A_30_P01017536	A_51_P225224	0.904762	0.001				A_30_P01025818
424	7	A_30_P01017536	A_51_P227222	0.809524	0.0079				A_30_P01026041
425	8	A_30_P01017536	A_51_P232649	0.857143	0.0036				A_30_P01026287
426	9	A_30_P01017536	A_51_P282557	0.761905	0.0152				A_30_P01026345
427	10	A_30_P01017536	A_51_P295085	0.761905	0.0123				A_30_P01026370
428	11	A_30_P01017536	A_51_P309556	0.857143	0.0036				A_30_P01026388
429	12	A_30_P01017536	A_51_P321600	0.857143	0.0052				A_30_P01026421
430	13	A_30_P01017536	A_51_P364871	0.857143	0.0032				A_30_P01026584
431	14	A_30_P01017536	A_51_P441426	0.928571	0.0004				A_30_P01026699
432	15	A_30_P01017536	A_51_P455338	0.761905	0.0147				A_30_P01026910
433	16	A_30_P01017536	A_51_P464703	0.714286	0.0249				A_30_P01027424
434	17	A_30_P01017536	A_51_P468260	0.857143	0.0044				A_30_P01027439
435	18	A_30_P01017536	A_51_P486719	0.857143	0.0032				A_30_P01027647
436	19	A_30_P01017536	A_52_P22617	0.714286	0.0239				A_30_P01027809
437	20	A_30_P01017536	A_52_P31641	0.952381	0.0001				A_30_P01027871
438	21	A_30_P01017536	A_52_P320261	0.714286	0.0247				A_30_P01028237
439	22	A_30_P01017536	A_52_P333063	0.952381	0.0001				A_30_P01028552
440	23	A_30_P01017536	A_52_P345261	0.833333	0.0063				A_30_P01028635
441	24	A_30_P01017536	A_52_P380710	0.761905	0.0139				A_30_P01028713
442	25	A_30_P01017536	A_52_P393738	0.738095	0.017				A_30_P01028750
443	26	A_30_P01017536	A_52_P469789	0.904762	0.0012				A_30_P01028980
444	27	A_30_P01017536	A_52_P494564	0.833333	0.0046				A_30_P01029259
445	28	A_30_P01017536	A_52_P526513	0.714286	0.0223				A_30_P01029353
446	29	A_30_P01017536	A_55_P1953823	0.952381	0				A_30_P01029833
447	30	A_30_P01017536	A_55_P1963606	0.809524	0.0081				A_30_P01030043
448	31	A_30_P01017536	A_55_P1965432	0.714286	0.0228				A_30_P01030249
449	32	A_30_P01017536	A_55_P1966070	0.738095	0.0189				A_30_P01030329
450	33	A_30_P01017536	A_55_P1966755	0.809524	0.008				A_30_P01030339
451	34	A_30_P01017536	A_55_P1975166	0.738095	0.0187				A_30_P01030528
452	35	A_30_P01017536	A_55_P1976714	0.833333	0.0059				A_30_P01030830
453	36	A_30_P01017536	A_55_P1980242	0.738095	0.0182				A_30_P01030852
454	37	A_30_P01017536	A_55_P1984607	0.714286	0.0228				A_30_P01030979
455	38	A_30_P01017536	A_55_P1986883	0.785714	0.0118				A_30_P01031055
456	39	A_30_P01017536	A_55_P1988108	0.809524	0.0077				A_30_P01031223
457	40	A_30_P01017536	A_55_P1988310	0.761905	0.0151				A_30_P01031235
458	41	A_30_P01017536	A_55_P1995104	0.857143	0.0021				A_30_P01031306
459	42	A_30_P01017536	A_55_P1997534	0.785714	0.0106				A_30_P01031513
460	43	A_30_P01017536	A_55_P1998843	0.714286	0.0227				A_30_P01031586
461	44	A_30_P01017536	A_55_P2000688	0.928571	0.0003				A_30_P01031617
462	45	A_30_P01017536	A_55_P2002727	0.809524	0.0069				A_30_P01031913
463	46	A_30_P01017536	A_55_P2003497	0.880952	0.002				A_30_P01031969
464	47	A_30_P01017536	A_55_P2004786	0.761905	0.0153				A_30_P01032143
465	48	A_30_P01017536	A_55_P2012702	0.833333	0.0053				A_30_P01032148
466	49	A_30_P01017536	A_55_P2013038	0.761905	0.0149				A_30_P01032366
467	50	A_30_P01017536	A_55_P2018934	0.761905	0.0151				A_30_P01032400
468	51	A_30_P01017536	A_55_P2026139	0.928571	0.001				A_30_P01032429
469	52	A_30_P01017536	A_55_P2026458	0.857143	0.0039				A_30_P01032511
470	53	A_30_P01017536	A_55_P2026460	0.857143	0.0036				A_30_P01032531
471	54	A_30_P01017536	A_55_P2028542	0.904762	0.0016				A_30_P01032601
472	55	A_30_P01017536	A_55_P2030229	0.809524	0.0062				A_30_P01032715
473	56	A_30_P01017536	A_55_P2032009	0.714286	0.0236				A_30_P01033073
474	57	A_30_P01017536	A_55_P2032167	0.761905	0.0162				A_30_P01033109
475	58	A_30_P01017536	A_55_P2032355	0.738095	0.0196				A_30_P01033111
476	59	A_30_P01017536	A_55_P2034320	0.880952	0.0022				A_30_P01033158
477	60	A_30_P01017536	A_55_P2040081	0.904762	0.001				A_30_P01033186
478	61	A_30_P01017536	A_55_P2041976	0.857143	0.0032				A_30_P01033304
479	62	A_30_P01017536	A_55_P2047480	0.738095	0.0178				A_30_P01033431
480	63	A_30_P01017536	A_55_P2055834	0.857143	0.004				A_30_P01033449
481	64	A_30_P01017536	A_55_P2057076	0.785714	0.0099
482	65	A_30_P01017536	A_55_P2061025	0.761905	0.015
483	66	A_30_P01017536	A_55_P2064523	0.880952	0.0013
484	67	A_30_P01017536	A_55_P2064702	0.857143	0.0044
485	68	A_30_P01017536	A_55_P2066727	0.761905	0.0134
486	69	A_30_P01017536	A_55_P2067747	0.904762	0.0009
487	70	A_30_P01017536	A_55_P2070492	0.785714	0.0089
488	71	A_30_P01017536	A_55_P2071940	0.809524	0.0073
489	72	A_30_P01017536	A_55_P2075874	0.833333	0.0058
490	73	A_30_P01017536	A_55_P2076891	0.714286	0.0229
491	74	A_30_P01017536	A_55_P2080074	0.928571	0.0008
492	75	A_30_P01017536	A_55_P2083186	0.833333	0.0057
493	76	A_30_P01017536	A_55_P2086381	0.97619	0
494	77	A_30_P01017536	A_55_P2101108	0.833333	0.0051
495	78	A_30_P01017536	A_55_P2103937	0.809524	0.0078
496	79	A_30_P01017536	A_55_P2107437	0.928571	0.0002
497	80	A_30_P01017536	A_55_P2107577	0.738095	0.018
498	81	A_30_P01017536	A_55_P2109407	0.833333	0.005
499	82	A_30_P01017536	A_55_P2111698	0.809524	0.008
500	83	A_30_P01017536	A_55_P2113330	0.833333	0.0053
501	84	A_30_P01017536	A_55_P2115057	0.880952	0.0032
502	85	A_30_P01017536	A_55_P2115198	0.785714	0.0112
503	86	A_30_P01017536	A_55_P2119287	0.928571	0.001
504	87	A_30_P01017536	A_55_P2120968	0.880952	0.0034
505	88	A_30_P01017536	A_55_P2121623	0.714286	0.0247
506	89	A_30_P01017536	A_55_P2122605	0.761905	0.0131
507	90	A_30_P01017536	A_55_P2122653	0.833333	0.0044
508	91	A_30_P01017536	A_55_P2122884	0.738095	0.0183
509	92	A_30_P01017536	A_55_P2123283	0.738095	0.0195
510	93	A_30_P01017536	A_55_P2123519	0.952381	0.0002
511	94	A_30_P01017536	A_55_P2126207	0.738095	0.0174
512	95	A_30_P01017536	A_55_P2127112	0.785714	0.0112
513	96	A_30_P01017536	A_55_P2127215	0.785714	0.011
514	97	A_30_P01017536	A_55_P2138217	0.880952	0.0021
515	98	A_30_P01017536	A_55_P2139426	0.809524	0.0073
516	99	A_30_P01017536	A_55_P2142650	0.738095	0.0188
517	100	A_30_P01017536	A_55_P2149670	0.952381	0.0003
518	101	A_30_P01017536	A_55_P2156776	0.738095	0.0176
519	102	A_30_P01017536	A_55_P2161214	0.833333	0.0048
520	103	A_30_P01017536	A_55_P2161794	0.785714	0.0117
521	104	A_30_P01017536	A_55_P2162807	0.761905	0.0146
522	105	A_30_P01017536	A_55_P2163348	0.904762	0.0017
523	106	A_30_P01017536	A_55_P2166960	0.785714	0.0102
524	107	A_30_P01017536	A_55_P2172663	0.833333	0.0044
525	108	A_30_P01017536	A_55_P2177463	0.761905	0.0135
526	109	A_30_P01017536	A_55_P2177633	0.952381	0.0001
527	110	A_30_P01017536	A_55_P2179676	0.809524	0.0057
528	111	A_30_P01017536	A_55_P2180091	0.738095	0.0192
529	112	A_30_P01017536	A_55_P2185875	0.880952	0.0019
530	113	A_30_P01017536	A_55_P2186802	0.952381	0.0003
531	114	A_30_P01017536	A_55_P2187954	0.714286	0.0233
532	115	A_30_P01017536	A_55_P2213418	0.952381	0.0002
533	116	A_30_P01017536	A_55_P2229791	0.880952	0.0025
534	117	A_30_P01017536	A_55_P2256019	0.785714	0.0103
535	118	A_30_P01017536	A_55_P2297177	0.738095	0.0199
536	119	A_30_P01017536	A_66_P100496	0.809524	0.0086
537	120	A_30_P01017536	A_66_P101366	0.880952	0.0025
538	121	A_30_P01017536	A_66_P103894	0.738095	0.0174
539	122	A_30_P01017536	A_66_P108214	0.714286	0.0215
540	123	A_30_P01017536	A_66_P113008	0.952381	0.0002
541	124	A_30_P01017536	A_66_P114782	0.738095	0.0184
542	125	A_30_P01017536	A_66_P118059	0.97619	0
543	126	A_30_P01017536	A_66_P119968	0.738095	0.0194
544	127	A_30_P01017536	A_66_P132295	0.880952	0.002
545	128	A_30_P01017536	A_66_P135452	0.857143	0.0042
546	129	A_30_P01017536	A_51_P146044	-0.714286	0.0244
547	130	A_30_P01017536	A_51_P200610	-0.857143	0.0031
548	131	A_30_P01017536	A_51_P215559	-0.785714	0.0103
549	132	A_30_P01017536	A_51_P233928	-0.714286	0.0209
550	133	A_30_P01017536	A_51_P266077	-0.880952	0.0026
551	134	A_30_P01017536	A_51_P270904	-0.738095	0.0181
552	135	A_30_P01017536	A_51_P288916	-0.904762	0.0011
553	136	A_30_P01017536	A_51_P362176	-0.880952	0.0026
554	137	A_30_P01017536	A_51_P428483	-0.928571	0.0005
555	138	A_30_P01017536	A_51_P470715	-0.714286	0.0234
556	139	A_30_P01017536	A_51_P492897	-0.857143	0.0024
557	140	A_30_P01017536	A_51_P494125	-0.857143	0.0038
558	141	A_30_P01017536	A_52_P14444	-0.809524	0.0069
559	142	A_30_P01017536	A_52_P227267	-0.714286	0.021
560	143	A_30_P01017536	A_52_P283501	-0.761905	0.0142
561	144	A_30_P01017536	A_52_P322421	-0.738095	0.0168
562	145	A_30_P01017536	A_52_P35377	-0.761905	0.0148
563	146	A_30_P01017536	A_52_P374983	-0.880952	0.0023
564	147	A_30_P01017536	A_52_P423247	-0.857143	0.0039
565	148	A_30_P01017536	A_52_P435561	-0.761905	0.0139
566	149	A_30_P01017536	A_52_P460836	-0.761905	0.0155
567	150	A_30_P01017536	A_52_P467488	-0.714286	0.0204
568	151	A_30_P01017536	A_52_P468683	-0.761905	0.0124
569	152	A_30_P01017536	A_52_P491569	-0.833333	0.0069
570	153	A_30_P01017536	A_52_P89335	-0.880952	0.002
571	154	A_30_P01017536	A_52_P920158	-0.761905	0.0143
572	155	A_30_P01017536	A_55_P1970105	-0.785714	0.0109
573	156	A_30_P01017536	A_55_P1977533	-0.809524	0.0088
574	157	A_30_P01017536	A_55_P1978028	-0.785714	0.0113
575	158	A_30_P01017536	A_55_P1991164	-0.738095	0.0182
576	159	A_30_P01017536	A_55_P2000201	-0.785714	0.0118
577	160	A_30_P01017536	A_55_P2016459	-0.761905	0.0138
578	161	A_30_P01017536	A_55_P2036220	-0.904762	0.0009
579	162	A_30_P01017536	A_55_P2071354	-0.809524	0.01
580	163	A_30_P01017536	A_55_P2101920	-0.833333	0.0068
581	164	A_30_P01017536	A_55_P2103541	-0.809524	0.0061
582	165	A_30_P01017536	A_55_P2109857	-0.857143	0.0031
583	166	A_30_P01017536	A_55_P2114118	-0.738095	0.0178
584	167	A_30_P01017536	A_55_P2119917	-0.952381	0.0006
585	168	A_30_P01017536	A_55_P2121613	-0.761905	0.0144
586	169	A_30_P01017536	A_55_P2147956	-0.785714	0.0096
587	170	A_30_P01017536	A_55_P2178818	-0.738095	0.0172
588	171	A_30_P01017536	A_55_P2249136	-0.714286	0.0238
589	172	A_30_P01017536	A_55_P2280868	-0.857143	0.0031
590	173	A_30_P01017536	A_55_P2329487	-0.833333	0.0048
591	174	A_30_P01017536	A_55_P2347529	-0.833333	0.0047
592	175	A_30_P01017536	A_55_P2381429	-0.809524	0.0086
593	176	A_30_P01017536	A_65_P17869	-0.785714	0.0105
594	177	A_30_P01017536	A_66_P109941	-0.880952	0.003
595	178	A_30_P01017536	A_66_P115004	-0.714286	0.0205
596	1	A_30_P01017567	A_51_P169745	0.761905	0.0141
597	2	A_30_P01017567	A_51_P208160	0.761905	0.0158
598	3	A_30_P01017567	A_51_P225224	0.809524	0.0084
599	4	A_30_P01017567	A_51_P232649	0.714286	0.0237
600	5	A_30_P01017567	A_51_P282557	0.761905	0.0139
601	6	A_30_P01017567	A_51_P309556	0.761905	0.0147
602	7	A_30_P01017567	A_51_P321600	0.952381	0.0003
603	8	A_30_P01017567	A_51_P364871	0.809524	0.0076
604	9	A_30_P01017567	A_51_P441426	0.809524	0.0068
605	10	A_30_P01017567	A_51_P468260	0.738095	0.0199
606	11	A_30_P01017567	A_51_P486719	0.761905	0.0148
607	12	A_30_P01017567	A_52_P31641	0.928571	0.001
608	13	A_30_P01017567	A_52_P333063	0.952381	0.0003
609	14	A_30_P01017567	A_52_P345261	0.785714	0.0111
610	15	A_30_P01017567	A_52_P380710	0.833333	0.0045
611	16	A_30_P01017567	A_52_P469789	0.761905	0.0144
612	17	A_30_P01017567	A_52_P526513	0.833333	0.0064
613	18	A_30_P01017567	A_55_P1953823	0.880952	0.0018
614	19	A_30_P01017567	A_55_P1963606	0.904762	0.0015
615	20	A_30_P01017567	A_55_P1965432	0.809524	0.0067
616	21	A_30_P01017567	A_55_P1966755	0.714286	0.0219
617	22	A_30_P01017567	A_55_P1975166	0.714286	0.0216
618	23	A_30_P01017567	A_55_P1976714	0.761905	0.0147
619	24	A_30_P01017567	A_55_P1980242	0.785714	0.0115
620	25	A_30_P01017567	A_55_P1984607	0.785714	0.0112
621	26	A_30_P01017567	A_55_P1986883	0.785714	0.0104
622	27	A_30_P01017567	A_55_P1988108	0.738095	0.0182
623	28	A_30_P01017567	A_55_P1995104	0.714286	0.0234
624	29	A_30_P01017567	A_55_P1997534	0.714286	0.0241
625	30	A_30_P01017567	A_55_P2000688	0.857143	0.0039
626	31	A_30_P01017567	A_55_P2003497	0.857143	0.0041
627	32	A_30_P01017567	A_55_P2005977	0.738095	0.0174
628	33	A_30_P01017567	A_55_P2012702	0.738095	0.0167
629	34	A_30_P01017567	A_55_P2026139	0.833333	0.0051
630	35	A_30_P01017567	A_55_P2026458	0.761905	0.0142
631	36	A_30_P01017567	A_55_P2026460	0.738095	0.0191
632	37	A_30_P01017567	A_55_P2028542	0.904762	0.0012
633	38	A_30_P01017567	A_55_P2032355	0.738095	0.0158
634	39	A_30_P01017567	A_55_P2034320	0.761905	0.0136
635	40	A_30_P01017567	A_55_P2040081	0.904762	0.001
636	41	A_30_P01017567	A_55_P2041976	0.761905	0.0132
637	42	A_30_P01017567	A_55_P2047480	0.738095	0.0175
638	43	A_30_P01017567	A_55_P2055834	0.738095	0.0169
639	44	A_30_P01017567	A_55_P2064523	0.857143	0.003
640	45	A_30_P01017567	A_55_P2064702	0.714286	0.0242
641	46	A_30_P01017567	A_55_P2067747	0.785714	0.011
642	47	A_30_P01017567	A_55_P2071940	0.714286	0.024
643	48	A_30_P01017567	A_55_P2075874	0.928571	0.0004
644	49	A_30_P01017567	A_55_P2080074	0.904762	0.0014
645	50	A_30_P01017567	A_55_P2083186	0.833333	0.0054
646	51	A_30_P01017567	A_55_P2086381	0.880952	0.0027
647	52	A_30_P01017567	A_55_P2101108	0.857143	0.0037
648	53	A_30_P01017567	A_55_P2103937	0.761905	0.0121
649	54	A_30_P01017567	A_55_P2107437	0.833333	0.0056
650	55	A_30_P01017567	A_55_P2109407	0.714286	0.0225
651	56	A_30_P01017567	A_55_P2111698	0.714286	0.0231
652	57	A_30_P01017567	A_55_P2115057	0.761905	0.0125
653	58	A_30_P01017567	A_55_P2119287	0.904762	0.0004
654	59	A_30_P01017567	A_55_P2120968	0.785714	0.0125
655	60	A_30_P01017567	A_55_P2122653	0.833333	0.0053
656	61	A_30_P01017567	A_55_P2123519	0.833333	0.0059
657	62	A_30_P01017567	A_55_P2127112	0.738095	0.0182
658	63	A_30_P01017567	A_55_P2127215	0.809524	0.007
659	64	A_30_P01017567	A_55_P2138217	0.738095	0.0164
660	65	A_30_P01017567	A_55_P2139426	0.738095	0.018
661	66	A_30_P01017567	A_55_P2149670	0.857143	0.0043
662	67	A_30_P01017567	A_55_P2151006	0.714286	0.0249
663	68	A_30_P01017567	A_55_P2156776	0.857143	0.0033
664	69	A_30_P01017567	A_55_P2161214	0.785714	0.0103
665	70	A_30_P01017567	A_55_P2163348	0.880952	0.0023
666	71	A_30_P01017567	A_55_P2166960	0.738095	0.0169
667	72	A_30_P01017567	A_55_P2168254	0.785714	0.0109
668	73	A_30_P01017567	A_55_P2172663	0.833333	0.0045
669	74	A_30_P01017567	A_55_P2177633	0.833333	0.005
670	75	A_30_P01017567	A_55_P2185875	0.880952	0.003
671	76	A_30_P01017567	A_55_P2186802	0.952381	0.0003
672	77	A_30_P01017567	A_55_P2213418	0.880952	0.0028
673	78	A_30_P01017567	A_55_P2229791	0.738095	0.0189
674	79	A_30_P01017567	A_55_P2256019	0.785714	0.0108
675	80	A_30_P01017567	A_55_P2259964	0.761905	0.0121
676	81	A_30_P01017567	A_55_P2270907	0.714286	0.0247
677	82	A_30_P01017567	A_55_P2321503	0.714286	0.0221
678	83	A_30_P01017567	A_66_P100496	0.785714	0.011
679	84	A_30_P01017567	A_66_P101366	0.880952	0.0025
680	85	A_30_P01017567	A_66_P103894	0.714286	0.0247
681	86	A_30_P01017567	A_66_P110167	0.761905	0.0141
682	87	A_30_P01017567	A_66_P113008	0.857143	0.0033
683	88	A_30_P01017567	A_66_P118059	0.928571	0.0008
684	89	A_30_P01017567	A_66_P120970	0.738095	0.0174
685	90	A_30_P01017567	A_66_P132295	0.761905	0.0142
686	91	A_30_P01017567	A_66_P135452	0.761905	0.0141
687	92	A_30_P01017567	A_51_P185627	-0.785714	0.0101
688	93	A_30_P01017567	A_51_P193173	-0.714286	0.0221
689	94	A_30_P01017567	A_51_P200610	-0.761905	0.0134
690	95	A_30_P01017567	A_51_P233928	-0.738095	0.0201
691	96	A_30_P01017567	A_51_P266077	-0.833333	0.0054
692	97	A_30_P01017567	A_51_P288916	-0.809524	0.0089
693	98	A_30_P01017567	A_51_P362176	-0.761905	0.0144
694	99	A_30_P01017567	A_51_P428483	-0.809524	0.0084
695	100	A_30_P01017567	A_51_P492897	-0.761905	0.0143
696	101	A_30_P01017567	A_51_P494125	-0.761905	0.0142
697	102	A_30_P01017567	A_52_P14444	-0.809524	0.0081
698	103	A_30_P01017567	A_52_P374983	-0.761905	0.0152
699	104	A_30_P01017567	A_52_P423247	-0.833333	0.0052
700	105	A_30_P01017567	A_52_P491569	-0.738095	0.017
701	106	A_30_P01017567	A_52_P604629	-0.738095	0.0182
702	107	A_30_P01017567	A_52_P89335	-0.809524	0.0074
703	108	A_30_P01017567	A_52_P920158	-0.809524	0.0062
704	109	A_30_P01017567	A_55_P1977533	-0.785714	0.0117
705	110	A_30_P01017567	A_55_P1991164	-0.809524	0.007
706	111	A_30_P01017567	A_55_P2000201	-0.690476	0.0239
707	112	A_30_P01017567	A_55_P2036220	-0.809524	0.0074
708	113	A_30_P01017567	A_55_P2071354	-0.809524	0.0059
709	114	A_30_P01017567	A_55_P2082215	-0.809524	0.0093
710	115	A_30_P01017567	A_55_P2101920	-0.738095	0.017
711	116	A_30_P01017567	A_55_P2103541	-0.880952	0.0019
712	117	A_30_P01017567	A_55_P2109857	-0.809524	0.0071
713	118	A_30_P01017567	A_55_P2113653	-0.738095	0.0183
714	119	A_30_P01017567	A_55_P2114118	-0.809524	0.0065
715	120	A_30_P01017567	A_55_P2119917	-0.952381	0.0004
716	121	A_30_P01017567	A_55_P2121608	-0.738095	0.0173
717	122	A_30_P01017567	A_55_P2121613	-0.761905	0.0136
718	123	A_30_P01017567	A_55_P2147956	-0.833333	0.0063
719	124	A_30_P01017567	A_55_P2178818	-0.785714	0.0105
720	125	A_30_P01017567	A_55_P2280868	-0.738095	0.0189
721	126	A_30_P01017567	A_55_P2329487	-0.738095	0.0192
722	127	A_30_P01017567	A_55_P2347529	-0.738095	0.0177
723	128	A_30_P01017567	A_66_P109941	-0.761905	0.0136
724	129	A_30_P01017567	A_66_P115004	-0.761905	0.0142
725	1	A_30_P01017593	A_52_P186937	0.809524	0.0077
726	2	A_30_P01017593	A_52_P223809	0.857143	0.0028
727	3	A_30_P01017593	A_55_P1977929	0.809524	0.0089
728	4	A_30_P01017593	A_55_P1980242	0.714286	0.0225
729	5	A_30_P01017593	A_55_P1981195	0.714286	0.0236
730	6	A_30_P01017593	A_55_P2085060	0.738095	0.0172
731	7	A_30_P01017593	A_55_P2111668	0.761905	0.0139
732	8	A_30_P01017593	A_55_P2116674	0.714286	0.023
733	9	A_30_P01017593	A_55_P2127854	0.714286	0.0204
734	10	A_30_P01017593	A_55_P2153331	0.714286	0.0225
735	11	A_30_P01017593	A_66_P122211	0.785714	0.0108
736	12	A_30_P01017593	A_66_P130024	0.833333	0.0059
737	13	A_30_P01017593	A_66_P136095	0.714286	0.0206
738	14	A_30_P01017593	A_51_P185627	-0.785714	0.0108
739	15	A_30_P01017593	A_51_P344008	-0.714286	0.0213
740	16	A_30_P01017593	A_51_P352381	-0.714286	0.0224
741	17	A_30_P01017593	A_51_P461504	-0.809524	0.0084
742	18	A_30_P01017593	A_52_P105765	-0.785714	0.0124
743	19	A_30_P01017593	A_52_P200610	-0.714286	0.0234
744	20	A_30_P01017593	A_52_P425004	-0.738095	0.0178
745	21	A_30_P01017593	A_52_P644114	-0.761905	0.0136
746	22	A_30_P01017593	A_52_P97889	-0.761905	0.0141
747	23	A_30_P01017593	A_55_P1970494	-0.809524	0.0069
748	24	A_30_P01017593	A_55_P1996893	-0.738095	0.0184
749	25	A_30_P01017593	A_55_P1998066	-0.785714	0.0115
750	26	A_30_P01017593	A_55_P2007500	-0.714286	0.022
751	27	A_30_P01017593	A_55_P2031611	-0.714286	0.0237
752	28	A_30_P01017593	A_55_P2049238	-0.761905	0.0147
753	29	A_30_P01017593	A_55_P2123123	-0.714286	0.0246
754	30	A_30_P01017593	A_55_P2126281	-0.738095	0.0164
755	31	A_30_P01017593	A_55_P2162935	-0.714286	0.0205
756	32	A_30_P01017593	A_55_P2166799	-0.785714	0.0115
757	33	A_30_P01017593	A_55_P2206269	-0.833333	0.0042
758	34	A_30_P01017593	A_55_P2241553	-0.809524	0.0061
759	35	A_30_P01017593	A_55_P2391000	-0.880952	0.002
760	36	A_30_P01017593	A_65_P05252	-0.761905	0.0143
761	37	A_30_P01017593	A_66_P121782	-0.714286	0.0232
762	1	A_30_P01017652	A_51_P201581	-0.809524	0.0085
763	2	A_30_P01017652	A_51_P321600	0.714286	0.0248
764	3	A_30_P01017652	A_51_P380699	-0.738095	0.0169
765	4	A_30_P01017652	A_55_P2028542	0.785714	0.0103
766	5	A_30_P01017652	A_55_P2032355	0.738095	0.0193
767	6	A_30_P01017652	A_55_P2075874	0.761905	0.0137
768	7	A_30_P01017652	A_55_P2111668	0.904762	0.001
769	8	A_30_P01017652	A_55_P2149083	0.761905	0.0139
770	9	A_30_P01017652	A_55_P2150113	0.904762	0.0016
771	10	A_30_P01017652	A_55_P2156776	0.714286	0.0226
772	11	A_30_P01017652	A_55_P2168254	0.761905	0.012
773	12	A_30_P01017652	A_51_P368394	0.714286	0.0224
774	13	A_30_P01017652	A_52_P920158	-0.857143	0.0038
775	14	A_30_P01017652	A_55_P1977533	-0.738095	0.0197
776	15	A_30_P01017652	A_55_P1991164	-0.785714	0.0116
777	16	A_30_P01017652	A_55_P2007500	-0.714286	0.0216
778	17	A_30_P01017652	A_55_P2240919	0.738095	0.0187
779	1	A_30_P01017759	A_51_P321600	0.738095	0.0218
780	2	A_30_P01017759	A_51_P324742	0.714286	0.0212
781	3	A_30_P01017759	A_51_P372393	0.880952	0.0019
782	4	A_30_P01017759	A_51_P401501	0.714286	0.0235
783	5	A_30_P01017759	A_51_P410205	0.785714	0.0107
784	6	A_30_P01017759	A_51_P410772	0.857143	0.0035
785	7	A_30_P01017759	A_51_P448971	0.857143	0.0042
786	8	A_30_P01017759	A_51_P464703	0.714286	0.0228
787	9	A_30_P01017759	A_52_P31641	0.785714	0.0105
788	10	A_30_P01017759	A_52_P333063	0.761905	0.0127
789	11	A_30_P01017759	A_52_P337388	0.714286	0.0244
790	12	A_30_P01017759	A_52_P380710	0.97619	0
791	13	A_30_P01017759	A_52_P388836	0.714286	0.0219
792	14	A_30_P01017759	A_52_P462949	0.714286	0.0228
793	15	A_30_P01017759	A_52_P517204	0.738095	0.0206
794	16	A_30_P01017759	A_52_P526513	0.880952	0.0026
795	17	A_30_P01017759	A_52_P528240	0.809524	0.0068
796	18	A_30_P01017759	A_52_P628212	0.714286	0.022
797	19	A_30_P01017759	A_55_P1953823	0.738095	0.0199
798	20	A_30_P01017759	A_55_P1954658	0.880952	0.0026
799	21	A_30_P01017759	A_55_P1959891	0.833333	0.0052
800	22	A_30_P01017759	A_55_P1965432	0.809524	0.0089
801	23	A_30_P01017759	A_55_P1966070	0.761905	0.0163
802	24	A_30_P01017759	A_55_P1969610	0.738095	0.0188
803	25	A_30_P01017759	A_55_P1975166	0.761905	0.0154
804	26	A_30_P01017759	A_55_P1982147	0.761905	0.0148
805	27	A_30_P01017759	A_55_P1984607	0.952381	0.0002
806	28	A_30_P01017759	A_55_P1985689	0.833333	0.0045
807	29	A_30_P01017759	A_55_P1986883	0.761905	0.0148
808	30	A_30_P01017759	A_55_P1994569	0.809524	0.0071
809	31	A_30_P01017759	A_55_P2003497	0.714286	0.0211
810	32	A_30_P01017759	A_55_P2005977	0.714286	0.0209
811	33	A_30_P01017759	A_55_P2022631	0.785714	0.0106
812	34	A_30_P01017759	A_55_P2024125	0.714286	0.0213
813	35	A_30_P01017759	A_55_P2034507	0.785714	0.0114
814	36	A_30_P01017759	A_55_P2040081	0.833333	0.0059
815	37	A_30_P01017759	A_55_P2042606	0.738095	0.0199
816	38	A_30_P01017759	A_55_P2047480	0.880952	0.0018
817	39	A_30_P01017759	A_55_P2056744	0.809524	0.0079
818	40	A_30_P01017759	A_55_P2057494	0.761905	0.0164
819	41	A_30_P01017759	A_55_P2065494	0.714286	0.0222
820	42	A_30_P01017759	A_55_P2071142	0.857143	0.0032
821	43	A_30_P01017759	A_55_P2075874	0.809524	0.0075
822	44	A_30_P01017759	A_55_P2080074	0.809524	0.0088
823	45	A_30_P01017759	A_55_P2080799	0.809524	0.0082
824	46	A_30_P01017759	A_55_P2083186	0.857143	0.0043
825	47	A_30_P01017759	A_55_P2087448	0.880952	0.0029
826	48	A_30_P01017759	A_55_P2101108	0.809524	0.009
827	49	A_30_P01017759	A_55_P2107140	0.761905	0.0155
828	50	A_30_P01017759	A_55_P2107352	0.714286	0.0236
829	51	A_30_P01017759	A_55_P2112787	0.761905	0.0137
830	52	A_30_P01017759	A_55_P2119287	0.738095	0.019
831	53	A_30_P01017759	A_55_P2122896	0.833333	0.0052
832	54	A_30_P01017759	A_55_P2127112	0.714286	0.0241
833	55	A_30_P01017759	A_55_P2127215	0.857143	0.0041
834	56	A_30_P01017759	A_55_P2135017	0.857143	0.0038
835	57	A_30_P01017759	A_55_P2157532	0.809524	0.0073
836	58	A_30_P01017759	A_55_P2166708	0.714286	0.0215
837	59	A_30_P01017759	A_55_P2167645	0.761905	0.0146
838	60	A_30_P01017759	A_55_P2172663	0.857143	0.0035
839	61	A_30_P01017759	A_55_P2176332	0.738095	0.0206
840	62	A_30_P01017759	A_55_P2182955	0.738095	0.0188
841	63	A_30_P01017759	A_55_P2185875	0.880952	0.0025
842	64	A_30_P01017759	A_55_P2186802	0.761905	0.0151
843	65	A_30_P01017759	A_55_P2196180	0.928571	0.0005
844	66	A_30_P01017759	A_55_P2213418	0.738095	0.0169
845	67	A_30_P01017759	A_55_P2217851	0.809524	0.0077
846	68	A_30_P01017759	A_55_P2259964	0.904762	0.0014
847	69	A_30_P01017759	A_55_P2297177	0.714286	0.0232
848	70	A_30_P01017759	A_65_P18756	0.880952	0.0025
849	71	A_30_P01017759	A_66_P100496	0.833333	0.005
850	72	A_30_P01017759	A_66_P101366	0.809524	0.0095
851	73	A_30_P01017759	A_66_P103894	0.761905	0.0136
852	74	A_30_P01017759	A_66_P110167	0.904762	0.0015
853	75	A_30_P01017759	A_66_P112641	0.738095	0.0189
854	76	A_30_P01017759	A_66_P120970	0.857143	0.004
855	77	A_30_P01017759	A_51_P193173	-0.785714	0.0132
856	78	A_30_P01017759	A_51_P272553	-0.785714	0.0122
857	79	A_30_P01017759	A_55_P1980292	-0.761905	0.0127
858	80	A_30_P01017759	A_55_P1991164	-0.761905	0.0149
859	81	A_30_P01017759	A_55_P1997465	-0.785714	0.011
860	82	A_30_P01017759	A_55_P2103541	-0.833333	0.0059
861	83	A_30_P01017759	A_66_P123980	-0.738095	0.0178
862	1	A_30_P01017768	A_51_P111962	0.738095	0.0161
863	2	A_30_P01017768	A_51_P149714	0.714286	0.0238
864	3	A_30_P01017768	A_51_P161021	0.857143	0.0037
865	4	A_30_P01017768	A_51_P169745	0.809524	0.0072
866	5	A_30_P01017768	A_51_P175667	0.809524	0.007
867	6	A_30_P01017768	A_51_P179504	0.785714	0.0109
868	7	A_30_P01017768	A_51_P193146	0.809524	0.0083
869	8	A_30_P01017768	A_51_P208160	0.809524	0.0077
870	9	A_30_P01017768	A_51_P225224	0.714286	0.0239
871	10	A_30_P01017768	A_51_P235687	0.761905	0.0148
872	11	A_30_P01017768	A_51_P284526	0.761905	0.0139
873	12	A_30_P01017768	A_51_P324742	0.857143	0.0027
874	13	A_30_P01017768	A_51_P364210	0.738095	0.0186
875	14	A_30_P01017768	A_51_P372393	0.857143	0.0029
876	15	A_30_P01017768	A_51_P385803	0.761905	0.0162
877	16	A_30_P01017768	A_51_P401501	0.785714	0.0133
878	17	A_30_P01017768	A_51_P405476	0.809524	0.0078
879	18	A_30_P01017768	A_51_P441426	0.761905	0.014
880	19	A_30_P01017768	A_51_P448971	0.833333	0.0049
881	20	A_30_P01017768	A_51_P455338	0.809524	0.0068
882	21	A_30_P01017768	A_51_P461779	0.785714	0.0113
883	22	A_30_P01017768	A_51_P464703	0.880952	0.0019
884	23	A_30_P01017768	A_51_P472867	0.904762	0.0014
885	24	A_30_P01017768	A_51_P485405	0.857143	0.0043
886	25	A_30_P01017768	A_51_P511151	0.833333	0.0058
887	26	A_30_P01017768	A_52_P130639	0.857143	0.0032
888	27	A_30_P01017768	A_52_P156734	0.714286	0.0247
889	28	A_30_P01017768	A_52_P177271	0.714286	0.0192
890	29	A_30_P01017768	A_52_P221588	0.785714	0.0105
891	30	A_30_P01017768	A_52_P22617	0.738095	0.0184
892	31	A_30_P01017768	A_52_P31510	0.785714	0.0123
893	32	A_30_P01017768	A_52_P31641	0.833333	0.0051
894	33	A_30_P01017768	A_52_P380710	0.785714	0.0105
895	34	A_30_P01017768	A_52_P393738	0.833333	0.0059
896	35	A_30_P01017768	A_52_P464228	0.809524	0.0089
897	36	A_30_P01017768	A_52_P465946	0.714286	0.0232
898	37	A_30_P01017768	A_52_P494564	0.738095	0.0195
899	38	A_30_P01017768	A_52_P526513	0.785714	0.0116
900	39	A_30_P01017768	A_52_P528240	0.857143	0.0031
901	40	A_30_P01017768	A_52_P541161	0.809524	0.0085
902	41	A_30_P01017768	A_52_P616356	0.761905	0.0121
903	42	A_30_P01017768	A_55_P1952900	0.761905	0.0131
904	43	A_30_P01017768	A_55_P1953823	0.785714	0.0107
905	44	A_30_P01017768	A_55_P1954658	0.857143	0.0039
906	45	A_30_P01017768	A_55_P1959891	0.833333	0.0069
907	46	A_30_P01017768	A_55_P1960246	0.809524	0.0073
908	47	A_30_P01017768	A_55_P1961943	0.714286	0.0225
909	48	A_30_P01017768	A_55_P1965363	0.761905	0.0128
910	49	A_30_P01017768	A_55_P1966070	0.738095	0.0183
911	50	A_30_P01017768	A_55_P1966755	0.714286	0.0224
912	51	A_30_P01017768	A_55_P1970349	0.809524	0.0078
913	52	A_30_P01017768	A_55_P1974577	0.714286	0.024
914	53	A_30_P01017768	A_55_P1974751	0.833333	0.0049
915	54	A_30_P01017768	A_55_P1975166	0.857143	0.0046
916	55	A_30_P01017768	A_55_P1976714	0.714286	0.0214
917	56	A_30_P01017768	A_55_P1980486	0.738095	0.0212
918	57	A_30_P01017768	A_55_P1981167	0.714286	0.0208
919	58	A_30_P01017768	A_55_P1982147	0.904762	0.0009
920	59	A_30_P01017768	A_55_P1984607	0.833333	0.0045
921	60	A_30_P01017768	A_55_P1986883	0.928571	0.001
922	61	A_30_P01017768	A_55_P1986907	0.809524	0.0068
923	62	A_30_P01017768	A_55_P1988108	0.738095	0.0181
924	63	A_30_P01017768	A_55_P1991812	0.714286	0.024
925	64	A_30_P01017768	A_55_P1994569	0.714286	0.0249
926	65	A_30_P01017768	A_55_P1995104	0.714286	0.0241
927	66	A_30_P01017768	A_55_P1995337	0.714286	0.0213
928	67	A_30_P01017768	A_55_P1996746	0.785714	0.0093
929	68	A_30_P01017768	A_55_P1997525	0.761905	0.0138
930	69	A_30_P01017768	A_55_P1997534	0.952381	0.0003
931	70	A_30_P01017768	A_55_P1998843	0.761905	0.0127
932	71	A_30_P01017768	A_55_P2001489	0.809524	0.0093
933	72	A_30_P01017768	A_55_P2003497	0.904762	0.0019
934	73	A_30_P01017768	A_55_P2004786	0.809524	0.0071
935	74	A_30_P01017768	A_55_P2005512	0.880952	0.0016
936	75	A_30_P01017768	A_55_P2012101	0.928571	0.0008
937	76	A_30_P01017768	A_55_P2012246	0.785714	0.0112
938	77	A_30_P01017768	A_55_P2012293	0.904762	0.001
939	78	A_30_P01017768	A_55_P2012702	0.785714	0.0108
940	79	A_30_P01017768	A_55_P2016471	0.857143	0.003
941	80	A_30_P01017768	A_55_P2018934	0.809524	0.0074
942	81	A_30_P01017768	A_55_P2024054	0.785714	0.0103
943	82	A_30_P01017768	A_55_P2024125	0.809524	0.009
944	83	A_30_P01017768	A_55_P2028542	0.714286	0.0238
945	84	A_30_P01017768	A_55_P2032355	0.738095	0.0189
946	85	A_30_P01017768	A_55_P2034320	0.809524	0.0082
947	86	A_30_P01017768	A_55_P2038262	0.809524	0.0083
948	87	A_30_P01017768	A_55_P2042606	0.857143	0.0028
949	88	A_30_P01017768	A_55_P2044922	0.833333	0.0052
950	89	A_30_P01017768	A_55_P2047480	0.785714	0.0106
951	90	A_30_P01017768	A_55_P2048550	0.738095	0.0196
952	91	A_30_P01017768	A_55_P2049944	0.785714	0.0107
953	92	A_30_P01017768	A_55_P2050360	0.880952	0.003
954	93	A_30_P01017768	A_55_P2051476	0.738095	0.0198
955	94	A_30_P01017768	A_55_P2055834	0.833333	0.0037
956	95	A_30_P01017768	A_55_P2056443	0.809524	0.0087
957	96	A_30_P01017768	A_55_P2056719	0.714286	0.0238
958	97	A_30_P01017768	A_55_P2056861	0.785714	0.011
959	98	A_30_P01017768	A_55_P2057076	0.785714	0.0108
960	99	A_30_P01017768	A_55_P2057489	0.761905	0.0152
961	100	A_30_P01017768	A_55_P2057494	0.785714	0.0118
962	101	A_30_P01017768	A_55_P2063755	0.714286	0.0224
963	102	A_30_P01017768	A_55_P2064702	0.714286	0.0227
964	103	A_30_P01017768	A_55_P2065494	0.904762	0.0012
965	104	A_30_P01017768	A_55_P2067747	0.785714	0.0115
966	105	A_30_P01017768	A_55_P2067971	0.785714	0.0112
967	106	A_30_P01017768	A_55_P2071142	0.809524	0.0083
968	107	A_30_P01017768	A_55_P2075874	0.738095	0.0196
969	108	A_30_P01017768	A_55_P2080074	0.857143	0.0034
970	109	A_30_P01017768	A_55_P2080799	0.785714	0.0093
971	110	A_30_P01017768	A_55_P2081785	0.738095	0.0172
972	111	A_30_P01017768	A_55_P2082854	0.809524	0.0069
973	112	A_30_P01017768	A_55_P2083186	0.880952	0.0019
974	113	A_30_P01017768	A_55_P2087448	0.857143	0.003
975	114	A_30_P01017768	A_55_P2089804	0.809524	0.0083
976	115	A_30_P01017768	A_55_P2092791	0.857143	0.0034
977	116	A_30_P01017768	A_55_P2094489	0.690476	0.0249
978	117	A_30_P01017768	A_55_P2095311	0.928571	0.0006
979	118	A_30_P01017768	A_55_P2103249	0.738095	0.0178
980	119	A_30_P01017768	A_55_P2103937	0.857143	0.003
981	120	A_30_P01017768	A_55_P2107140	0.809524	0.008
982	121	A_30_P01017768	A_55_P2107352	0.761905	0.0124
983	122	A_30_P01017768	A_55_P2107437	0.738095	0.0177
984	123	A_30_P01017768	A_55_P2107577	0.833333	0.0043
985	124	A_30_P01017768	A_55_P2109407	0.857143	0.0034
986	125	A_30_P01017768	A_55_P2114953	0.714286	0.0235
987	126	A_30_P01017768	A_55_P2115057	0.809524	0.0089
988	127	A_30_P01017768	A_55_P2115198	0.785714	0.0122
989	128	A_30_P01017768	A_55_P2115401	0.809524	0.0085
990	129	A_30_P01017768	A_55_P2119287	0.857143	0.0041
991	130	A_30_P01017768	A_55_P2120232	0.880952	0.0015
992	131	A_30_P01017768	A_55_P2120968	0.738095	0.0174
993	132	A_30_P01017768	A_55_P2121623	0.904762	0.0008
994	133	A_30_P01017768	A_55_P2122604	0.761905	0.0156
995	134	A_30_P01017768	A_55_P2122605	0.809524	0.0078
996	135	A_30_P01017768	A_55_P2122884	0.761905	0.0142
997	136	A_30_P01017768	A_55_P2122896	0.880952	0.0024
998	137	A_30_P01017768	A_55_P2123283	0.714286	0.024
999	138	A_30_P01017768	A_55_P2123519	0.738095	0.0201
1000	139	A_30_P01017768	A_55_P2127112	0.880952	0.0026
1001	140	A_30_P01017768	A_55_P2127215	0.857143	0.0039
1002	141	A_30_P01017768	A_55_P2135017	0.833333	0.0072
1003	142	A_30_P01017768	A_55_P2139356	0.809524	0.0078
1004	143	A_30_P01017768	A_55_P2142650	0.928571	0.0008
1005	144	A_30_P01017768	A_55_P2147245	0.761905	0.0138
1006	145	A_30_P01017768	A_55_P2149641	0.857143	0.0039
1007	146	A_30_P01017768	A_55_P2150113	0.714286	0.0233
1008	147	A_30_P01017768	A_55_P2151991	0.833333	0.0053
1009	148	A_30_P01017768	A_55_P2156006	0.904762	0.0008
1010	149	A_30_P01017768	A_55_P2157008	0.761905	0.0153
1011	150	A_30_P01017768	A_55_P2159315	0.738095	0.0179
1012	151	A_30_P01017768	A_55_P2166708	0.714286	0.0238
1013	152	A_30_P01017768	A_55_P2172663	0.880952	0.0023
1014	153	A_30_P01017768	A_55_P2173011	0.785714	0.012
1015	154	A_30_P01017768	A_55_P2173210	0.952381	0.0002
1016	155	A_30_P01017768	A_55_P2176332	0.809524	0.0098
1017	156	A_30_P01017768	A_55_P2177073	0.809524	0.0075
1018	157	A_30_P01017768	A_55_P2177633	0.738095	0.0165
1019	158	A_30_P01017768	A_55_P2185875	0.833333	0.0053
1020	159	A_30_P01017768	A_55_P2196180	0.809524	0.0066
1021	160	A_30_P01017768	A_55_P2199202	0.738095	0.0188
1022	161	A_30_P01017768	A_55_P2213418	0.785714	0.0115
1023	162	A_30_P01017768	A_55_P2256019	0.833333	0.005
1024	163	A_30_P01017768	A_55_P2259964	0.809524	0.0091
1025	164	A_30_P01017768	A_55_P2297177	0.738095	0.0206
1026	165	A_30_P01017768	A_55_P2342696	0.738095	0.0213
1027	166	A_30_P01017768	A_55_P2367350	0.761905	0.0144
1028	167	A_30_P01017768	A_65_P18756	0.809524	0.0077
1029	168	A_30_P01017768	A_66_P101366	0.833333	0.0054
1030	169	A_30_P01017768	A_66_P103894	0.857143	0.004
1031	170	A_30_P01017768	A_66_P108214	0.833333	0.005
1032	171	A_30_P01017768	A_66_P110167	0.857143	0.004
1033	172	A_30_P01017768	A_66_P112641	0.952381	0.0004
1034	173	A_30_P01017768	A_66_P118059	0.738095	0.0185
1035	174	A_30_P01017768	A_66_P119968	0.714286	0.023
1036	175	A_30_P01017768	A_66_P123357	0.880952	0.0027
1037	176	A_30_P01017768	A_66_P130840	0.714286	0.0233
1038	177	A_30_P01017768	A_66_P132295	0.809524	0.0075
1039	178	A_30_P01017768	A_66_P138662	0.785714	0.0113
1040	179	A_30_P01017768	ERCC-00123_60	0.761905	0.0148
1041	180	A_30_P01017768	ERCC-00165_60	0.738095	0.0194
1042	181	A_30_P01017768	A_51_P193173	-0.761905	0.0145
1043	182	A_30_P01017768	A_51_P256224	-0.880952	0.0025
1044	183	A_30_P01017768	A_51_P272553	-0.857143	0.004
1045	184	A_30_P01017768	A_51_P288916	-0.761905	0.0165
1046	185	A_30_P01017768	A_51_P362176	-0.809524	0.0093
1047	186	A_30_P01017768	A_51_P428483	-0.761905	0.0155
1048	187	A_30_P01017768	A_52_P322421	-0.833333	0.0052
1049	188	A_30_P01017768	A_52_P480266	-0.761905	0.0125
1050	189	A_30_P01017768	A_55_P1966690	-0.785714	0.0111
1051	190	A_30_P01017768	A_55_P1985788	-0.809524	0.0067
1052	191	A_30_P01017768	A_55_P1989728	-0.714286	0.0244
1053	192	A_30_P01017768	A_55_P1991164	-0.857143	0.0031
1054	193	A_30_P01017768	A_55_P1997465	-0.785714	0.0107
1055	194	A_30_P01017768	A_55_P2000201	-0.738095	0.0189
1056	195	A_30_P01017768	A_55_P2071354	-0.809524	0.0073
1057	196	A_30_P01017768	A_55_P2073248	-0.785714	0.0112
1058	197	A_30_P01017768	A_55_P2084890	-0.714286	0.0216
1059	198	A_30_P01017768	A_55_P2103541	-0.785714	0.0122
1060	199	A_30_P01017768	A_55_P2121613	-0.714286	0.0211
1061	200	A_30_P01017768	A_55_P2365902	-0.714286	0.0225
1062	1	A_30_P01017772	A_51_P147274	0.738095	0.0184
1063	2	A_30_P01017772	A_51_P149714	0.738095	0.018
1064	3	A_30_P01017772	A_51_P154485	0.809524	0.0074
1065	4	A_30_P01017772	A_51_P154842	0.857143	0.0044
1066	5	A_30_P01017772	A_51_P162144	0.833333	0.0052
1067	6	A_30_P01017772	A_51_P173114	0.761905	0.014
1068	7	A_30_P01017772	A_51_P194503	0.952381	0.0002
1069	8	A_30_P01017772	A_51_P232748	0.904762	0.0008
1070	9	A_30_P01017772	A_51_P238009	0.857143	0.0037
1071	10	A_30_P01017772	A_51_P241457	0.809524	0.0074
1072	11	A_30_P01017772	A_51_P241645	0.904762	0.0012
1073	12	A_30_P01017772	A_51_P262515	0.761905	0.0144
1074	13	A_30_P01017772	A_51_P275454	0.738095	0.022
1075	14	A_30_P01017772	A_51_P284526	0.761905	0.014
1076	15	A_30_P01017772	A_51_P304170	0.809524	0.0085
1077	16	A_30_P01017772	A_51_P324535	0.714286	0.0242
1078	17	A_30_P01017772	A_51_P327657	0.857143	0.0039
1079	18	A_30_P01017772	A_51_P387123	0.809524	0.0065
1080	19	A_30_P01017772	A_51_P410205	0.761905	0.0138
1081	20	A_30_P01017772	A_51_P421876	0.809524	0.0077
1082	21	A_30_P01017772	A_51_P465350	0.738095	0.018
1083	22	A_30_P01017772	A_51_P487690	0.809524	0.0086
1084	23	A_30_P01017772	A_51_P497724	0.761905	0.0139
1085	24	A_30_P01017772	A_51_P505914	0.833333	0.0051
1086	25	A_30_P01017772	A_52_P156734	0.952381	0.0002
1087	26	A_30_P01017772	A_52_P167382	0.904762	0.0019
1088	27	A_30_P01017772	A_52_P18236	0.809524	0.0081
1089	28	A_30_P01017772	A_52_P267717	0.714286	0.0199
1090	29	A_30_P01017772	A_52_P31510	0.857143	0.0039
1091	30	A_30_P01017772	A_52_P330111	0.928571	0.0007
1092	31	A_30_P01017772	A_52_P337388	0.857143	0.0035
1093	32	A_30_P01017772	A_52_P380369	0.833333	0.0063
1094	33	A_30_P01017772	A_52_P388836	0.857143	0.0028
1095	34	A_30_P01017772	A_52_P408757	0.761905	0.0123
1096	35	A_30_P01017772	A_52_P425890	0.857143	0.0041
1097	36	A_30_P01017772	A_52_P465946	0.928571	0.0006
1098	37	A_30_P01017772	A_52_P47126	0.833333	0.0048
1099	38	A_30_P01017772	A_52_P512427	0.738095	0.0162
1100	39	A_30_P01017772	A_52_P517204	0.761905	0.0137
1101	40	A_30_P01017772	A_52_P615247	0.714286	0.023
1102	41	A_30_P01017772	A_52_P616356	0.761905	0.0135
1103	42	A_30_P01017772	A_52_P628212	0.809524	0.0067
1104	43	A_30_P01017772	A_52_P679860	0.809524	0.0075
1105	44	A_30_P01017772	A_52_P796840	0.714286	0.0232
1106	45	A_30_P01017772	A_55_P1952935	0.880952	0.0028
1107	46	A_30_P01017772	A_55_P1953836	0.738095	0.0181
1108	47	A_30_P01017772	A_55_P1954648	0.880952	0.0021
1109	48	A_30_P01017772	A_55_P1958712	0.714286	0.0203
1110	49	A_30_P01017772	A_55_P1959891	0.833333	0.0052
1111	50	A_30_P01017772	A_55_P1960376	0.738095	0.0181
1112	51	A_30_P01017772	A_55_P1960416	0.738095	0.0154
1113	52	A_30_P01017772	A_55_P1962766	0.785714	0.0106
1114	53	A_30_P01017772	A_55_P1966731	0.809524	0.0079
1115	54	A_30_P01017772	A_55_P1969610	0.928571	0.0003
1116	55	A_30_P01017772	A_55_P1973417	0.833333	0.0043
1117	56	A_30_P01017772	A_55_P1974577	0.738095	0.0194
1118	57	A_30_P01017772	A_55_P1976743	0.809524	0.0074
1119	58	A_30_P01017772	A_55_P1977473	0.761905	0.0143
1120	59	A_30_P01017772	A_55_P1981479	0.785714	0.0103
1121	60	A_30_P01017772	A_55_P1982394	0.785714	0.0099
1122	61	A_30_P01017772	A_55_P1984243	0.880952	0.003
1123	62	A_30_P01017772	A_55_P1987226	0.833333	0.0047
1124	63	A_30_P01017772	A_55_P1990840	0.738095	0.0187
1125	64	A_30_P01017772	A_55_P1991812	0.857143	0.0033
1126	65	A_30_P01017772	A_55_P1992530	0.761905	0.0146
1127	66	A_30_P01017772	A_55_P1995337	0.833333	0.0055
1128	67	A_30_P01017772	A_55_P1998416	0.738095	0.0196
1129	68	A_30_P01017772	A_55_P1998942	0.809524	0.0092
1130	69	A_30_P01017772	A_55_P1998943	0.809524	0.0068
1131	70	A_30_P01017772	A_55_P1999162	0.809524	0.0081
1132	71	A_30_P01017772	A_55_P2001489	0.809524	0.0078
1133	72	A_30_P01017772	A_55_P2001876	0.761905	0.0134
1134	73	A_30_P01017772	A_55_P2006240	0.857143	0.003
1135	74	A_30_P01017772	A_55_P2007155	0.714286	0.0235
1136	75	A_30_P01017772	A_55_P2015687	0.809524	0.0078
1137	76	A_30_P01017772	A_55_P2018904	0.857143	0.0033
1138	77	A_30_P01017772	A_55_P2019601	0.809524	0.0075
1139	78	A_30_P01017772	A_55_P2025891	0.714286	0.0234
1140	79	A_30_P01017772	A_55_P2026223	0.904762	0.0012
1141	80	A_30_P01017772	A_55_P2026632	0.833333	0.0049
1142	81	A_30_P01017772	A_55_P2034507	0.952381	0
1143	82	A_30_P01017772	A_55_P2034938	0.880952	0.0014
1144	83	A_30_P01017772	A_55_P2042988	0.785714	0.0098
1145	84	A_30_P01017772	A_55_P2043367	0.761905	0.0146
1146	85	A_30_P01017772	A_55_P2048912	0.880952	0.0023
1147	86	A_30_P01017772	A_55_P2053404	0.904762	0.0011
1148	87	A_30_P01017772	A_55_P2056443	0.809524	0.0059
1149	88	A_30_P01017772	A_55_P2057494	0.714286	0.0209
1150	89	A_30_P01017772	A_55_P2066976	0.738095	0.0182
1151	90	A_30_P01017772	A_55_P2068461	0.761905	0.016
1152	91	A_30_P01017772	A_55_P2079291	0.738095	0.0157
1153	92	A_30_P01017772	A_55_P2086279	0.809524	0.0058
1154	93	A_30_P01017772	A_55_P2086433	0.761905	0.0135
1155	94	A_30_P01017772	A_55_P2089233	0.761905	0.0171
1156	95	A_30_P01017772	A_55_P2100194	0.857143	0.0022
1157	96	A_30_P01017772	A_55_P2103225	0.714286	0.0231
1158	97	A_30_P01017772	A_55_P2106068	0.785714	0.0111
1159	98	A_30_P01017772	A_55_P2106454	0.738095	0.0191
1160	99	A_30_P01017772	A_55_P2107775	0.809524	0.0082
1161	100	A_30_P01017772	A_55_P2112787	0.880952	0.0023
1162	101	A_30_P01017772	A_55_P2115623	0.880952	0.0019
1163	102	A_30_P01017772	A_55_P2129047	0.738095	0.0192
1164	103	A_30_P01017772	A_55_P2129999	0.761905	0.0153
1165	104	A_30_P01017772	A_55_P2130834	0.761905	0.014
1166	105	A_30_P01017772	A_55_P2131667	0.833333	0.0064
1167	106	A_30_P01017772	A_55_P2133907	0.738095	0.0164
1168	107	A_30_P01017772	A_55_P2139356	0.785714	0.0127
1169	108	A_30_P01017772	A_55_P2151601	0.833333	0.0055
1170	109	A_30_P01017772	A_55_P2152699	0.857143	0.0037
1171	110	A_30_P01017772	A_55_P2166708	0.833333	0.0063
1172	111	A_30_P01017772	A_55_P2169779	0.857143	0.0029
1173	112	A_30_P01017772	A_55_P2181397	0.761905	0.0128
1174	113	A_30_P01017772	A_55_P2182955	0.857143	0.0046
1175	114	A_30_P01017772	A_55_P2184013	0.761905	0.0144
1176	115	A_30_P01017772	A_55_P2186220	0.809524	0.0069
1177	116	A_30_P01017772	A_55_P2187211	0.809524	0.0081
1178	117	A_30_P01017772	A_55_P2196180	0.809524	0.0078
1179	118	A_30_P01017772	A_55_P2208961	0.785714	0.0113
1180	119	A_30_P01017772	A_55_P2214580	0.809524	0.0095
1181	120	A_30_P01017772	A_55_P2299737	0.738095	0.0185
1182	121	A_30_P01017772	A_55_P2367350	0.928571	0.001
1183	122	A_30_P01017772	A_66_P100165	0.761905	0.0137
1184	123	A_30_P01017772	A_66_P105350	0.833333	0.0061
1185	124	A_30_P01017772	A_66_P110633	0.809524	0.0077
1186	125	A_30_P01017772	A_66_P110741	0.761905	0.0132
1187	126	A_30_P01017772	A_66_P121787	0.785714	0.0109
1188	127	A_30_P01017772	A_66_P127463	0.904762	0.0015
1189	128	A_30_P01017772	A_66_P130853	0.928571	0.0004
1190	129	A_30_P01017772	A_66_P138662	0.857143	0.0041
1191	130	A_30_P01017772	A_51_P133097	-0.738095	0.019
1192	131	A_30_P01017772	A_51_P144319	-0.809524	0.0076
1193	132	A_30_P01017772	A_51_P150120	-0.809524	0.0089
1194	133	A_30_P01017772	A_51_P176086	-0.809524	0.0079
1195	134	A_30_P01017772	A_51_P196590	-0.809524	0.0071
1196	135	A_30_P01017772	A_51_P199168	-0.809524	0.0065
1197	136	A_30_P01017772	A_51_P269084	-0.809524	0.008
1198	137	A_30_P01017772	A_51_P272553	-0.714286	0.0248
1199	138	A_30_P01017772	A_51_P290207	-0.857143	0.0032
1200	139	A_30_P01017772	A_51_P293339	-0.714286	0.0237
1201	140	A_30_P01017772	A_51_P309988	-0.833333	0.0053
1202	141	A_30_P01017772	A_51_P317505	-0.761905	0.0122
1203	142	A_30_P01017772	A_51_P368870	-0.904762	0.0009
1204	143	A_30_P01017772	A_51_P406429	-0.809524	0.0068
1205	144	A_30_P01017772	A_51_P413111	-0.738095	0.018
1206	145	A_30_P01017772	A_52_P1011	-0.857143	0.0038
1207	146	A_30_P01017772	A_52_P256279	-0.761905	0.013
1208	147	A_30_P01017772	A_52_P360515	-0.785714	0.0107
1209	148	A_30_P01017772	A_52_P387009	-0.761905	0.014
1210	149	A_30_P01017772	A_55_P1957700	-0.738095	0.0196
1211	150	A_30_P01017772	A_55_P1960916	-0.809524	0.0087
1212	151	A_30_P01017772	A_55_P1961760	-0.785714	0.0108
1213	152	A_30_P01017772	A_55_P1968325	-0.761905	0.0132
1214	153	A_30_P01017772	A_55_P1973011	-0.714286	0.0208
1215	154	A_30_P01017772	A_55_P1979814	-0.785714	0.0113
1216	155	A_30_P01017772	A_55_P1980292	-0.880952	0.0022
1217	156	A_30_P01017772	A_55_P1989813	-0.809524	0.0088
1218	157	A_30_P01017772	A_55_P2012627	-0.761905	0.0136
1219	158	A_30_P01017772	A_55_P2017689	-0.833333	0.006
1220	159	A_30_P01017772	A_55_P2017739	-0.785714	0.0106
1221	160	A_30_P01017772	A_55_P2070766	-0.785714	0.0122
1222	161	A_30_P01017772	A_55_P2071581	-0.738095	0.0194
1223	162	A_30_P01017772	A_55_P2073248	-0.714286	0.0234
1224	163	A_30_P01017772	A_55_P2081388	-0.833333	0.0043
1225	164	A_30_P01017772	A_55_P2089577	-0.880952	0.0013
1226	165	A_30_P01017772	A_55_P2091858	-0.904762	0.0014
1227	166	A_30_P01017772	A_55_P2112484	-0.880952	0.0027
1228	167	A_30_P01017772	A_55_P2138159	-0.714286	0.0205
1229	168	A_30_P01017772	A_55_P2145531	-0.928571	0.0006
1230	169	A_30_P01017772	A_55_P2176150	-0.738095	0.0215
1231	170	A_30_P01017772	A_55_P2200780	-0.809524	0.0068
1232	171	A_30_P01017772	A_55_P2207342	-0.809524	0.0085
1233	172	A_30_P01017772	A_55_P2215580	-0.785714	0.0114
1234	173	A_30_P01017772	A_55_P2271058	-0.761905	0.0138
1235	174	A_30_P01017772	A_55_P2305420	-0.738095	0.0181
1236	175	A_30_P01017772	A_55_P2329313	-0.928571	0.0008
1237	176	A_30_P01017772	A_55_P2375905	-0.833333	0.0043
1238	177	A_30_P01017772	A_55_P2406758	-0.714286	0.0216
1239	178	A_30_P01017772	A_55_P2425761	-0.857143	0.0044
1240	179	A_30_P01017772	A_55_P2471029	-0.928571	0.001
1241	180	A_30_P01017772	A_66_P123980	-0.857143	0.004
1242	181	A_30_P01017772	A_66_P132550	-0.833333	0.0059
1243	1	A_30_P01017842	A_51_P282557	0.761905	0.0139
1244	2	A_30_P01017842	A_51_P364871	0.761905	0.014
1245	3	A_30_P01017842	A_51_P468260	0.714286	0.0206
1246	4	A_30_P01017842	A_52_P345261	0.785714	0.0092
1247	5	A_30_P01017842	A_55_P1976949	0.714286	0.0234
1248	6	A_30_P01017842	A_55_P2000688	0.738095	0.0175
1249	7	A_30_P01017842	A_55_P2039684	0.714286	0.0229
1250	8	A_30_P01017842	A_55_P2064523	0.785714	0.0109
1251	9	A_30_P01017842	A_55_P2067425	0.714286	0.0249
1252	10	A_30_P01017842	A_55_P2072666	0.761905	0.0164
1253	11	A_30_P01017842	A_55_P2076041	0.833333	0.0062
1254	12	A_30_P01017842	A_55_P2076891	0.904762	0.0011
1255	13	A_30_P01017842	A_55_P2104363	0.857143	0.0028
1256	14	A_30_P01017842	A_55_P2123939	0.833333	0.0055
1257	15	A_30_P01017842	A_55_P2132128	0.809524	0.0062
1258	16	A_30_P01017842	A_55_P2139426	0.761905	0.0125
1259	17	A_30_P01017842	A_55_P2149450	0.785714	0.0121
1260	18	A_30_P01017842	A_55_P2163348	0.761905	0.0123
1261	19	A_30_P01017842	A_55_P2177463	0.809524	0.0066
1262	20	A_30_P01017842	A_55_P2378030	0.738095	0.0171
1263	21	A_30_P01017842	A_51_P215559	-0.785714	0.0122
1264	22	A_30_P01017842	A_51_P266077	-0.738095	0.0186
1265	23	A_30_P01017842	A_51_P435489	-0.857143	0.0034
1266	24	A_30_P01017842	A_51_P470715	-0.809524	0.0078
1267	25	A_30_P01017842	A_52_P14444	-0.714286	0.0195
1268	26	A_30_P01017842	A_52_P235995	-0.833333	0.0058
1269	27	A_30_P01017842	A_52_P237232	-0.809524	0.0081
1270	28	A_30_P01017842	A_52_P28960	-0.880952	0.0028
1271	29	A_30_P01017842	A_52_P338796	-0.833333	0.0045
1272	30	A_30_P01017842	A_52_P423247	-0.809524	0.0065
1273	31	A_30_P01017842	A_52_P604629	-0.714286	0.021
1274	32	A_30_P01017842	A_52_P89335	-0.785714	0.0099
1275	33	A_30_P01017842	A_55_P2006604	-0.904762	0.0016
1276	34	A_30_P01017842	A_55_P2055920	-0.809524	0.0074
1277	35	A_30_P01017842	A_55_P2069806	-0.761905	0.0139
1278	36	A_30_P01017842	A_55_P2109857	-0.761905	0.0148
1279	37	A_30_P01017842	A_55_P2114118	-0.738095	0.0169
1280	38	A_30_P01017842	A_55_P2140338	-0.809524	0.0078
1281	39	A_30_P01017842	A_55_P2172058	-0.880952	0.0028
1282	40	A_30_P01017842	A_55_P2249136	-0.714286	0.0201
1283	41	A_30_P01017842	A_65_P17869	-0.785714	0.011
1284	1	A_30_P01017882	A_51_P111962	0.833333	0.0058
1285	2	A_30_P01017882	A_51_P161021	0.714286	0.0243
1286	3	A_30_P01017882	A_51_P169745	0.857143	0.0033
1287	4	A_30_P01017882	A_51_P208160	0.761905	0.0138
1288	5	A_30_P01017882	A_51_P225224	0.809524	0.0084
1289	6	A_30_P01017882	A_51_P227222	0.738095	0.0173
1290	7	A_30_P01017882	A_51_P232649	0.714286	0.0235
1291	8	A_30_P01017882	A_51_P295085	0.714286	0.0214
1292	9	A_30_P01017882	A_51_P324742	0.809524	0.006
1293	10	A_30_P01017882	A_51_P372393	0.904762	0.0013
1294	11	A_30_P01017882	A_51_P385803	0.714286	0.0227
1295	12	A_30_P01017882	A_51_P401501	0.880952	0.0021
1296	13	A_30_P01017882	A_51_P441426	0.809524	0.0067
1297	14	A_30_P01017882	A_51_P448971	0.928571	0.0007
1298	15	A_30_P01017882	A_51_P464703	0.738095	0.0181
1299	16	A_30_P01017882	A_51_P472867	0.714286	0.0213
1300	17	A_30_P01017882	A_51_P511151	0.738095	0.0188
1301	18	A_30_P01017882	A_52_P130639	0.714286	0.0214
1302	19	A_30_P01017882	A_52_P31641	0.928571	0.0008
1303	20	A_30_P01017882	A_52_P333063	0.714286	0.0239
1304	21	A_30_P01017882	A_52_P380710	0.833333	0.0056
1305	22	A_30_P01017882	A_52_P385736	0.714286	0.0246
1306	23	A_30_P01017882	A_52_P393738	0.738095	0.0185
1307	24	A_30_P01017882	A_52_P469789	0.809524	0.007
1308	25	A_30_P01017882	A_52_P494564	0.833333	0.0062
1309	26	A_30_P01017882	A_52_P526513	0.833333	0.0037
1310	27	A_30_P01017882	A_52_P528240	0.904762	0.0006
1311	28	A_30_P01017882	A_52_P541161	0.761905	0.0138
1312	29	A_30_P01017882	A_55_P1953823	0.833333	0.0057
1313	30	A_30_P01017882	A_55_P1954658	0.809524	0.0076
1314	31	A_30_P01017882	A_55_P1960246	0.714286	0.024
1315	32	A_30_P01017882	A_55_P1965363	0.714286	0.0225
1316	33	A_30_P01017882	A_55_P1966070	0.785714	0.0103
1317	34	A_30_P01017882	A_55_P1970349	0.761905	0.0149
1318	35	A_30_P01017882	A_55_P1974751	0.785714	0.0098
1319	36	A_30_P01017882	A_55_P1975166	0.761905	0.0135
1320	37	A_30_P01017882	A_55_P1976714	0.857143	0.0029
1321	38	A_30_P01017882	A_55_P1982147	0.761905	0.0156
1322	39	A_30_P01017882	A_55_P1984607	0.785714	0.0106
1323	40	A_30_P01017882	A_55_P1986883	0.97619	0
1324	41	A_30_P01017882	A_55_P1986907	0.761905	0.0139
1325	42	A_30_P01017882	A_55_P1988108	0.833333	0.0048
1326	43	A_30_P01017882	A_55_P1994569	0.857143	0.0036
1327	44	A_30_P01017882	A_55_P1995104	0.857143	0.0032
1328	45	A_30_P01017882	A_55_P1997534	0.857143	0.0048
1329	46	A_30_P01017882	A_55_P2000688	0.714286	0.0226
1330	47	A_30_P01017882	A_55_P2003497	0.952381	0
1331	48	A_30_P01017882	A_55_P2005512	0.833333	0.0053
1332	49	A_30_P01017882	A_55_P2012101	0.880952	0.0019
1333	50	A_30_P01017882	A_55_P2012293	0.857143	0.003
1334	51	A_30_P01017882	A_55_P2012702	0.928571	0.0007
1335	52	A_30_P01017882	A_55_P2013038	0.714286	0.0195
1336	53	A_30_P01017882	A_55_P2016471	0.809524	0.008
1337	54	A_30_P01017882	A_55_P2018964	0.714286	0.0217
1338	55	A_30_P01017882	A_55_P2022631	0.714286	0.0224
1339	56	A_30_P01017882	A_55_P2024125	0.904762	0.0009
1340	57	A_30_P01017882	A_55_P2025891	0.714286	0.0245
1341	58	A_30_P01017882	A_55_P2026460	0.785714	0.0108
1342	59	A_30_P01017882	A_55_P2026898	0.761905	0.0134
1343	60	A_30_P01017882	A_55_P2028542	0.761905	0.0134
1344	61	A_30_P01017882	A_55_P2030229	0.738095	0.0184
1345	62	A_30_P01017882	A_55_P2034320	0.857143	0.0032
1346	63	A_30_P01017882	A_55_P2040081	0.761905	0.0132
1347	64	A_30_P01017882	A_55_P2042606	0.714286	0.0234
1348	65	A_30_P01017882	A_55_P2047480	0.880952	0.0023
1349	66	A_30_P01017882	A_55_P2049944	0.833333	0.0046
1350	67	A_30_P01017882	A_55_P2050360	0.738095	0.018
1351	68	A_30_P01017882	A_55_P2055834	0.738095	0.017
1352	69	A_30_P01017882	A_55_P2056861	0.738095	0.0181
1353	70	A_30_P01017882	A_55_P2057489	0.809524	0.0073
1354	71	A_30_P01017882	A_55_P2064523	0.761905	0.0131
1355	72	A_30_P01017882	A_55_P2064702	0.761905	0.0131
1356	73	A_30_P01017882	A_55_P2065494	0.809524	0.0068
1357	74	A_30_P01017882	A_55_P2066727	0.714286	0.0233
1358	75	A_30_P01017882	A_55_P2067747	0.880952	0.0025
1359	76	A_30_P01017882	A_55_P2071142	0.761905	0.0134
1360	77	A_30_P01017882	A_55_P2075874	0.833333	0.0063
1361	78	A_30_P01017882	A_55_P2080074	0.904762	0.0008
1362	79	A_30_P01017882	A_55_P2080799	0.880952	0.0022
1363	80	A_30_P01017882	A_55_P2082854	0.761905	0.0158
1364	81	A_30_P01017882	A_55_P2083186	0.833333	0.0052
1365	82	A_30_P01017882	A_55_P2086381	0.785714	0.0109
1366	83	A_30_P01017882	A_55_P2087448	0.904762	0.0017
1367	84	A_30_P01017882	A_55_P2092791	0.761905	0.0137
1368	85	A_30_P01017882	A_55_P2094337	0.738095	0.0158
1369	86	A_30_P01017882	A_55_P2095311	0.785714	0.0095
1370	87	A_30_P01017882	A_55_P2103937	0.809524	0.0066
1371	88	A_30_P01017882	A_55_P2107140	0.904762	0.0007
1372	89	A_30_P01017882	A_55_P2107352	0.714286	0.0236
1373	90	A_30_P01017882	A_55_P2107437	0.833333	0.0061
1374	91	A_30_P01017882	A_55_P2107577	0.738095	0.0202
1375	92	A_30_P01017882	A_55_P2108521	0.714286	0.0235
1376	93	A_30_P01017882	A_55_P2109407	0.809524	0.0059
1377	94	A_30_P01017882	A_55_P2113330	0.761905	0.0128
1378	95	A_30_P01017882	A_55_P2115057	0.857143	0.0033
1379	96	A_30_P01017882	A_55_P2119287	0.904762	0.0014
1380	97	A_30_P01017882	A_55_P2120232	0.833333	0.0052
1381	98	A_30_P01017882	A_55_P2120968	0.785714	0.0117
1382	99	A_30_P01017882	A_55_P2121623	0.809524	0.0069
1383	100	A_30_P01017882	A_55_P2122884	0.857143	0.0038
1384	101	A_30_P01017882	A_55_P2122896	0.785714	0.0115
1385	102	A_30_P01017882	A_55_P2123519	0.833333	0.0051
1386	103	A_30_P01017882	A_55_P2127112	0.97619	0
1387	104	A_30_P01017882	A_55_P2127215	0.904762	0.0012
1388	105	A_30_P01017882	A_55_P2135017	0.928571	0.0006
1389	106	A_30_P01017882	A_55_P2138217	0.785714	0.0117
1390	107	A_30_P01017882	A_55_P2139426	0.785714	0.0112
1391	108	A_30_P01017882	A_55_P2142650	0.833333	0.0051
1392	109	A_30_P01017882	A_55_P2149641	0.714286	0.0236
1393	110	A_30_P01017882	A_55_P2149670	0.714286	0.0231
1394	111	A_30_P01017882	A_55_P2155843	0.761905	0.0144
1395	112	A_30_P01017882	A_55_P2156006	0.761905	0.016
1396	113	A_30_P01017882	A_55_P2157532	0.714286	0.0244
1397	114	A_30_P01017882	A_55_P2159315	0.833333	0.0057
1398	115	A_30_P01017882	A_55_P2163348	0.785714	0.0107
1399	116	A_30_P01017882	A_55_P2172663	0.833333	0.0053
1400	117	A_30_P01017882	A_55_P2173210	0.809524	0.0084
1401	118	A_30_P01017882	A_55_P2176332	0.857143	0.0034
1402	119	A_30_P01017882	A_55_P2177633	0.833333	0.0057
1403	120	A_30_P01017882	A_55_P2179676	0.738095	0.0194
1404	121	A_30_P01017882	A_55_P2185875	0.880952	0.0023
1405	122	A_30_P01017882	A_55_P2187954	0.785714	0.0111
1406	123	A_30_P01017882	A_55_P2196180	0.761905	0.0127
1407	124	A_30_P01017882	A_55_P2213418	0.833333	0.0046
1408	125	A_30_P01017882	A_55_P2229791	0.785714	0.0111
1409	126	A_30_P01017882	A_55_P2256019	0.738095	0.0179
1410	127	A_30_P01017882	A_55_P2259964	0.761905	0.0126
1411	128	A_30_P01017882	A_55_P2297177	0.785714	0.011
1412	129	A_30_P01017882	A_55_P2321503	0.761905	0.0161
1413	130	A_30_P01017882	A_55_P2342696	0.833333	0.0073
1414	131	A_30_P01017882	A_65_P18756	0.714286	0.021
1415	132	A_30_P01017882	A_66_P101366	0.880952	0.002
1416	133	A_30_P01017882	A_66_P103894	0.761905	0.0158
1417	134	A_30_P01017882	A_66_P108214	0.928571	0.0005
1418	135	A_30_P01017882	A_66_P110167	0.952381	0
1419	136	A_30_P01017882	A_66_P112641	0.809524	0.0093
1420	137	A_30_P01017882	A_66_P113008	0.714286	0.0224
1421	138	A_30_P01017882	A_66_P118059	0.785714	0.0113
1422	139	A_30_P01017882	A_66_P123357	0.738095	0.0174
1423	140	A_30_P01017882	A_66_P130840	0.857143	0.003
1424	141	A_30_P01017882	A_66_P132295	0.761905	0.0123
1425	142	A_30_P01017882	ERCC-00123_60	0.714286	0.0211
1426	143	A_30_P01017882	A_51_P193173	-0.857143	0.0045
1427	144	A_30_P01017882	A_51_P256224	-0.785714	0.0095
1428	145	A_30_P01017882	A_51_P263246	-0.714286	0.0233
1429	146	A_30_P01017882	A_51_P272553	-0.809524	0.0079
1430	147	A_30_P01017882	A_51_P288916	-0.809524	0.0069
1431	148	A_30_P01017882	A_51_P362176	-0.761905	0.0153
1432	149	A_30_P01017882	A_51_P428483	-0.809524	0.0084
1433	150	A_30_P01017882	A_51_P470715	-0.714286	0.0218
1434	151	A_30_P01017882	A_52_P322421	-0.738095	0.0155
1435	152	A_30_P01017882	A_52_P468683	-0.785714	0.0111
1436	153	A_30_P01017882	A_52_P480266	-0.714286	0.0222
1437	154	A_30_P01017882	A_52_P920158	-0.714286	0.0226
1438	155	A_30_P01017882	A_55_P1978028	-0.714286	0.0236
1439	156	A_30_P01017882	A_55_P1991164	-0.904762	0.0015
1440	157	A_30_P01017882	A_55_P1997465	-0.928571	0.0005
1441	158	A_30_P01017882	A_55_P2036220	-0.761905	0.0139
1442	159	A_30_P01017882	A_55_P2071354	-0.857143	0.0038
1443	160	A_30_P01017882	A_55_P2073248	-0.738095	0.0195
1444	161	A_30_P01017882	A_55_P2121613	-0.761905	0.0139
1445	162	A_30_P01017882	A_55_P2280868	-0.738095	0.0179
1446	1	A_30_P01017891	A_51_P147274	0.738095	0.0174
1447	2	A_30_P01017891	A_51_P149714	0.785714	0.0108
1448	3	A_30_P01017891	A_51_P193146	0.785714	0.0121
1449	4	A_30_P01017891	A_51_P324742	0.857143	0.0031
1450	5	A_30_P01017891	A_51_P334063	0.738095	0.0176
1451	6	A_30_P01017891	A_51_P351860	0.738095	0.0187
1452	7	A_30_P01017891	A_51_P385803	0.809524	0.0094
1453	8	A_30_P01017891	A_51_P408363	0.714286	0.024
1454	9	A_30_P01017891	A_51_P465350	0.738095	0.0174
1455	10	A_30_P01017891	A_51_P472867	0.714286	0.0212
1456	11	A_30_P01017891	A_51_P485405	0.880952	0.0024
1457	12	A_30_P01017891	A_51_P511151	0.857143	0.0038
1458	13	A_30_P01017891	A_52_P130639	0.880952	0.0021
1459	14	A_30_P01017891	A_52_P208416	0.809524	0.0073
1460	15	A_30_P01017891	A_52_P221588	0.833333	0.0064
1461	16	A_30_P01017891	A_52_P385736	0.761905	0.0101
1462	17	A_30_P01017891	A_52_P408757	0.761905	0.0131
1463	18	A_30_P01017891	A_52_P463518	0.809524	0.007
1464	19	A_30_P01017891	A_52_P528240	0.761905	0.0146
1465	20	A_30_P01017891	A_52_P541161	0.761905	0.0142
1466	21	A_30_P01017891	A_52_P602669	0.714286	0.0245
1467	22	A_30_P01017891	A_55_P1952900	0.738095	0.0193
1468	23	A_30_P01017891	A_55_P1965363	0.714286	0.0223
1469	24	A_30_P01017891	A_55_P1970349	0.880952	0.0025
1470	25	A_30_P01017891	A_55_P1974577	0.785714	0.0093
1471	26	A_30_P01017891	A_55_P1974751	0.833333	0.0051
1472	27	A_30_P01017891	A_55_P1976913	0.761905	0.0153
1473	28	A_30_P01017891	A_55_P1982147	0.761905	0.0131
1474	29	A_30_P01017891	A_55_P1986883	0.761905	0.014
1475	30	A_30_P01017891	A_55_P1986907	0.857143	0.004
1476	31	A_30_P01017891	A_55_P1988108	0.761905	0.0142
1477	32	A_30_P01017891	A_55_P1997525	0.857143	0.0033
1478	33	A_30_P01017891	A_55_P2001489	0.738095	0.0175
1479	34	A_30_P01017891	A_55_P2005512	0.738095	0.0195
1480	35	A_30_P01017891	A_55_P2012246	0.809524	0.0083
1481	36	A_30_P01017891	A_55_P2012293	0.904762	0.0015
1482	37	A_30_P01017891	A_55_P2016471	0.904762	0.0016
1483	38	A_30_P01017891	A_55_P2018964	0.761905	0.0153
1484	39	A_30_P01017891	A_55_P2024054	0.880952	0.003
1485	40	A_30_P01017891	A_55_P2028214	0.761905	0.0151
1486	41	A_30_P01017891	A_55_P2038262	0.761905	0.0157
1487	42	A_30_P01017891	A_55_P2042606	0.738095	0.0165
1488	43	A_30_P01017891	A_55_P2048550	0.833333	0.0048
1489	44	A_30_P01017891	A_55_P2050360	0.738095	0.0192
1490	45	A_30_P01017891	A_55_P2051476	0.904762	0.0014
1491	46	A_30_P01017891	A_55_P2053309	0.857143	0.004
1492	47	A_30_P01017891	A_55_P2056443	0.738095	0.0198
1493	48	A_30_P01017891	A_55_P2056719	0.738095	0.0187
1494	49	A_30_P01017891	A_55_P2057489	0.833333	0.0051
1495	50	A_30_P01017891	A_55_P2067971	0.904762	0.0015
1496	51	A_30_P01017891	A_55_P2075220	0.738095	0.0166
1497	52	A_30_P01017891	A_55_P2082854	0.761905	0.0144
1498	53	A_30_P01017891	A_55_P2086433	0.761905	0.0143
1499	54	A_30_P01017891	A_55_P2092791	0.904762	0.0015
1500	55	A_30_P01017891	A_55_P2095311	0.880952	0.0028
1501	56	A_30_P01017891	A_55_P2103937	0.761905	0.0148
1502	57	A_30_P01017891	A_55_P2108521	0.857143	0.0034
1503	58	A_30_P01017891	A_55_P2114953	0.714286	0.0231
1504	59	A_30_P01017891	A_55_P2120232	0.738095	0.0195
1505	60	A_30_P01017891	A_55_P2127215	0.738095	0.019
1506	61	A_30_P01017891	A_55_P2129047	0.738095	0.0166
1507	62	A_30_P01017891	A_55_P2131742	0.857143	0.0037
1508	63	A_30_P01017891	A_55_P2134715	0.833333	0.0062
1509	64	A_30_P01017891	A_55_P2143105	0.904762	0.0007
1510	65	A_30_P01017891	A_55_P2149641	0.880952	0.0025
1511	66	A_30_P01017891	A_55_P2152369	0.714286	0.023
1512	67	A_30_P01017891	A_55_P2156006	0.809524	0.0087
1513	68	A_30_P01017891	A_55_P2159315	0.880952	0.0025
1514	69	A_30_P01017891	A_55_P2173011	0.714286	0.0244
1515	70	A_30_P01017891	A_55_P2173210	0.738095	0.0186
1516	71	A_30_P01017891	A_55_P2174633	0.809524	0.0082
1517	72	A_30_P01017891	A_55_P2176332	0.738095	0.0174
1518	73	A_30_P01017891	A_55_P2177073	0.857143	0.0032
1519	74	A_30_P01017891	A_55_P2187954	0.761905	0.0146
1520	75	A_30_P01017891	A_55_P2199202	1	0
1521	76	A_30_P01017891	A_55_P2342696	0.904762	0.0007
1522	77	A_30_P01017891	A_65_P17218	0.809524	0.0064
1523	78	A_30_P01017891	A_66_P110750	0.809524	0.0074
1524	79	A_30_P01017891	A_66_P112641	0.809524	0.0071
1525	80	A_30_P01017891	ERCC-00123_60	0.714286	0.0217
1526	81	A_30_P01017891	ERCC-00165_60	0.857143	0.0037
1527	82	A_30_P01017891	A_51_P337918	-0.809524	0.0073
1528	83	A_30_P01017891	A_52_P15674	0.785714	0.0115
1529	84	A_30_P01017891	A_55_P1957700	-0.714286	0.0219
1530	1	A_30_P01017898	A_51_P111962	0.857143	0.0043
1531	2	A_30_P01017898	A_51_P121031	0.785714	0.0106
1532	3	A_30_P01017898	A_51_P132013	0.904762	0.0015
1533	4	A_30_P01017898	A_51_P147274	0.714286	0.0228
1534	5	A_30_P01017898	A_51_P150678	0.833333	0.0042
1535	6	A_30_P01017898	A_51_P161021	0.738095	0.018
1536	7	A_30_P01017898	A_51_P169745	0.833333	0.0061
1537	8	A_30_P01017898	A_51_P175667	0.809524	0.0076
1538	9	A_30_P01017898	A_51_P179504	0.761905	0.0137
1539	10	A_30_P01017898	A_51_P186476	0.785714	0.0111
1540	11	A_30_P01017898	A_51_P193146	0.833333	0.004
1541	12	A_30_P01017898	A_51_P208160	0.809524	0.0089
1542	13	A_30_P01017898	A_51_P209280	0.904762	0.0013
1543	14	A_30_P01017898	A_51_P225224	0.738095	0.02
1544	15	A_30_P01017898	A_51_P227222	0.785714	0.0106
1545	16	A_30_P01017898	A_51_P232649	0.714286	0.0218
1546	17	A_30_P01017898	A_51_P235687	0.880952	0.002
1547	18	A_30_P01017898	A_51_P261517	0.904762	0.0007
1548	19	A_30_P01017898	A_51_P295085	0.761905	0.0126
1549	20	A_30_P01017898	A_51_P298837	0.714286	0.0224
1550	21	A_30_P01017898	A_51_P372393	0.785714	0.0117
1551	22	A_30_P01017898	A_51_P385803	0.761905	0.0137
1552	23	A_30_P01017898	A_51_P405476	0.904762	0.0008
1553	24	A_30_P01017898	A_51_P408363	0.714286	0.0226
1554	25	A_30_P01017898	A_51_P422625	0.880952	0.0024
1555	26	A_30_P01017898	A_51_P430766	0.738095	0.0181
1556	27	A_30_P01017898	A_51_P448971	0.714286	0.0211
1557	28	A_30_P01017898	A_51_P455338	0.809524	0.0075
1558	29	A_30_P01017898	A_51_P461779	0.714286	0.0241
1559	30	A_30_P01017898	A_51_P472867	0.809524	0.0077
1560	31	A_30_P01017898	A_51_P483511	0.714286	0.0199
1561	32	A_30_P01017898	A_51_P511151	0.857143	0.0038
1562	33	A_30_P01017898	A_51_P513568	0.833333	0.0055
1563	34	A_30_P01017898	A_51_P517695	0.714286	0.022
1564	35	A_30_P01017898	A_52_P130639	0.785714	0.0112
1565	36	A_30_P01017898	A_52_P157837	0.928571	0.0003
1566	37	A_30_P01017898	A_52_P161237	0.904762	0.0005
1567	38	A_30_P01017898	A_52_P221588	0.904762	0.0014
1568	39	A_30_P01017898	A_52_P22617	0.904762	0.001
1569	40	A_30_P01017898	A_52_P258617	0.761905	0.0132
1570	41	A_30_P01017898	A_52_P320261	0.714286	0.0238
1571	42	A_30_P01017898	A_52_P356204	0.928571	0.0006
1572	43	A_30_P01017898	A_52_P385736	0.785714	0.0111
1573	44	A_30_P01017898	A_52_P393738	0.904762	0.0009
1574	45	A_30_P01017898	A_52_P412585	0.833333	0.0055
1575	46	A_30_P01017898	A_52_P464228	0.97619	0.0002
1576	47	A_30_P01017898	A_52_P469789	0.738095	0.0164
1577	48	A_30_P01017898	A_52_P47126	0.738095	0.0196
1578	49	A_30_P01017898	A_52_P494564	0.809524	0.0079
1579	50	A_30_P01017898	A_52_P541161	0.809524	0.008
1580	51	A_30_P01017898	A_52_P577748	0.833333	0.0057
1581	52	A_30_P01017898	A_52_P602669	0.714286	0.0221
1582	53	A_30_P01017898	A_52_P607128	0.880952	0.0025
1583	54	A_30_P01017898	A_55_P1952618	0.857143	0.0031
1584	55	A_30_P01017898	A_55_P1953823	0.714286	0.0237
1585	56	A_30_P01017898	A_55_P1954658	0.761905	0.0132
1586	57	A_30_P01017898	A_55_P1960246	0.97619	0
1587	58	A_30_P01017898	A_55_P1961943	0.833333	0.0053
1588	59	A_30_P01017898	A_55_P1965363	0.761905	0.0146
1589	60	A_30_P01017898	A_55_P1966450	0.833333	0.0063
1590	61	A_30_P01017898	A_55_P1974751	0.833333	0.0057
1591	62	A_30_P01017898	A_55_P1975166	0.738095	0.0185
1592	63	A_30_P01017898	A_55_P1976913	0.880952	0.0022
1593	64	A_30_P01017898	A_55_P1977042	0.857143	0.0032
1594	65	A_30_P01017898	A_55_P1980486	0.738095	0.0187
1595	66	A_30_P01017898	A_55_P1981167	0.97619	0
1596	67	A_30_P01017898	A_55_P1982147	0.714286	0.0207
1597	68	A_30_P01017898	A_55_P1986907	0.809524	0.0115
1598	69	A_30_P01017898	A_55_P1988202	0.809524	0.009
1599	70	A_30_P01017898	A_55_P1990535	0.928571	0.0006
1600	71	A_30_P01017898	A_55_P1995104	0.785714	0.0088
1601	72	A_30_P01017898	A_55_P1997126	0.785714	0.0109
1602	73	A_30_P01017898	A_55_P1997525	0.880952	0.0025
1603	74	A_30_P01017898	A_55_P1997534	0.785714	0.0105
1604	75	A_30_P01017898	A_55_P2003638	0.785714	0.0104
1605	76	A_30_P01017898	A_55_P2004786	0.809524	0.0067
1606	77	A_30_P01017898	A_55_P2005512	0.857143	0.0032
1607	78	A_30_P01017898	A_55_P2006008	0.928571	0.0004
1608	79	A_30_P01017898	A_55_P2007646	0.880952	0.002
1609	80	A_30_P01017898	A_55_P2009395	0.809524	0.009
1610	81	A_30_P01017898	A_55_P2010292	0.785714	0.0105
1611	82	A_30_P01017898	A_55_P2010301	0.833333	0.0056
1612	83	A_30_P01017898	A_55_P2012216	0.833333	0.006
1613	84	A_30_P01017898	A_55_P2012702	0.761905	0.0129
1614	85	A_30_P01017898	A_55_P2013038	0.761905	0.0166
1615	86	A_30_P01017898	A_55_P2017914	0.761905	0.0128
1616	87	A_30_P01017898	A_55_P2018934	0.809524	0.0076
1617	88	A_30_P01017898	A_55_P2018964	0.761905	0.0131
1618	89	A_30_P01017898	A_55_P2024125	0.714286	0.0237
1619	90	A_30_P01017898	A_55_P2025937	0.833333	0.0049
1620	91	A_30_P01017898	A_55_P2028853	0.809524	0.0082
1621	92	A_30_P01017898	A_55_P2029046	0.761905	0.0146
1622	93	A_30_P01017898	A_55_P2030229	0.857143	0.0043
1623	94	A_30_P01017898	A_55_P2034320	0.833333	0.0063
1624	95	A_30_P01017898	A_55_P2035509	0.738095	0.0178
1625	96	A_30_P01017898	A_55_P2042606	0.761905	0.0127
1626	97	A_30_P01017898	A_55_P2044922	0.761905	0.0131
1627	98	A_30_P01017898	A_55_P2045136	0.738095	0.0183
1628	99	A_30_P01017898	A_55_P2046709	0.833333	0.0042
1629	100	A_30_P01017898	A_55_P2047753	0.714286	0.022
1630	101	A_30_P01017898	A_55_P2047768	0.738095	0.0175
1631	102	A_30_P01017898	A_55_P2049944	0.880952	0.002
1632	103	A_30_P01017898	A_55_P2050360	0.880952	0.0022
1633	104	A_30_P01017898	A_55_P2050722	0.857143	0.0044
1634	105	A_30_P01017898	A_55_P2052913	0.714286	0.0219
1635	106	A_30_P01017898	A_55_P2055834	0.761905	0.0143
1636	107	A_30_P01017898	A_55_P2056719	0.738095	0.0168
1637	108	A_30_P01017898	A_55_P2056789	0.738095	0.0178
1638	109	A_30_P01017898	A_55_P2056861	0.952381	0.0003
1639	110	A_30_P01017898	A_55_P2057076	0.857143	0.0036
1640	111	A_30_P01017898	A_55_P2057489	0.785714	0.0095
1641	112	A_30_P01017898	A_55_P2062774	0.809524	0.0068
1642	113	A_30_P01017898	A_55_P2063755	0.785714	0.0107
1643	114	A_30_P01017898	A_55_P2064702	0.714286	0.0241
1644	115	A_30_P01017898	A_55_P2065494	0.833333	0.0058
1645	116	A_30_P01017898	A_55_P2066230	0.880952	0.0019
1646	117	A_30_P01017898	A_55_P2066727	0.761905	0.0131
1647	118	A_30_P01017898	A_55_P2067747	0.761905	0.0151
1648	119	A_30_P01017898	A_55_P2067971	0.714286	0.0247
1649	120	A_30_P01017898	A_55_P2072666	0.714286	0.0241
1650	121	A_30_P01017898	A_55_P2080799	0.809524	0.0073
1651	122	A_30_P01017898	A_55_P2081785	1	0
1652	123	A_30_P01017898	A_55_P2082319	0.761905	0.0125
1653	124	A_30_P01017898	A_55_P2082854	0.809524	0.0073
1654	125	A_30_P01017898	A_55_P2087448	0.785714	0.0104
1655	126	A_30_P01017898	A_55_P2089804	0.833333	0.0047
1656	127	A_30_P01017898	A_55_P2092791	0.785714	0.0111
1657	128	A_30_P01017898	A_55_P2094489	0.714286	0.0231
1658	129	A_30_P01017898	A_55_P2095311	0.761905	0.0151
1659	130	A_30_P01017898	A_55_P2103249	0.738095	0.0175
1660	131	A_30_P01017898	A_55_P2107140	0.785714	0.012
1661	132	A_30_P01017898	A_55_P2107352	0.833333	0.0056
1662	133	A_30_P01017898	A_55_P2107577	0.904762	0.0013
1663	134	A_30_P01017898	A_55_P2107632	0.904762	0.0015
1664	135	A_30_P01017898	A_55_P2109407	0.738095	0.0191
1665	136	A_30_P01017898	A_55_P2113330	0.714286	0.0214
1666	137	A_30_P01017898	A_55_P2113857	0.833333	0.0037
1667	138	A_30_P01017898	A_55_P2115057	0.833333	0.0051
1668	139	A_30_P01017898	A_55_P2115198	0.857143	0.0029
1669	140	A_30_P01017898	A_55_P2115401	0.904762	0.0007
1670	141	A_30_P01017898	A_55_P2118537	0.761905	0.0133
1671	142	A_30_P01017898	A_55_P2120232	0.857143	0.0029
1672	143	A_30_P01017898	A_55_P2121623	0.880952	0.003
1673	144	A_30_P01017898	A_55_P2122604	0.785714	0.0106
1674	145	A_30_P01017898	A_55_P2122605	0.809524	0.0065
1675	146	A_30_P01017898	A_55_P2122884	0.833333	0.0051
1676	147	A_30_P01017898	A_55_P2122896	0.714286	0.0232
1677	148	A_30_P01017898	A_55_P2127112	0.761905	0.0139
1678	149	A_30_P01017898	A_55_P2127385	0.880952	0.0024
1679	150	A_30_P01017898	A_55_P2128853	0.857143	0.0036
1680	151	A_30_P01017898	A_55_P2129047	0.714286	0.0226
1681	152	A_30_P01017898	A_55_P2132549	0.833333	0.0054
1682	153	A_30_P01017898	A_55_P2135017	0.714286	0.0208
1683	154	A_30_P01017898	A_55_P2138217	0.809524	0.0079
1684	155	A_30_P01017898	A_55_P2139356	0.738095	0.0176
1685	156	A_30_P01017898	A_55_P2142650	0.809524	0.007
1686	157	A_30_P01017898	A_55_P2147245	0.857143	0.0038
1687	158	A_30_P01017898	A_55_P2149641	0.785714	0.0115
1688	159	A_30_P01017898	A_55_P2155843	0.761905	0.0136
1689	160	A_30_P01017898	A_55_P2156006	0.738095	0.02
1690	161	A_30_P01017898	A_55_P2157008	0.785714	0.0109
1691	162	A_30_P01017898	A_55_P2162792	0.928571	0.001
1692	163	A_30_P01017898	A_55_P2169569	0.785714	0.0089
1693	164	A_30_P01017898	A_55_P2169669	0.761905	0.0162
1694	165	A_30_P01017898	A_55_P2173011	0.714286	0.0215
1695	166	A_30_P01017898	A_55_P2173210	0.857143	0.0039
1696	167	A_30_P01017898	A_55_P2174661	0.857143	0.005
1697	168	A_30_P01017898	A_55_P2176332	0.809524	0.0073
1698	169	A_30_P01017898	A_55_P2177073	0.738095	0.0192
1699	170	A_30_P01017898	A_55_P2177633	0.714286	0.0246
1700	171	A_30_P01017898	A_55_P2179309	0.809524	0.0083
1701	172	A_30_P01017898	A_55_P2181738	0.880952	0.0025
1702	173	A_30_P01017898	A_55_P2185605	0.761905	0.0156
1703	174	A_30_P01017898	A_55_P2213418	0.714286	0.0209
1704	175	A_30_P01017898	A_55_P2227355	0.785714	0.0097
1705	176	A_30_P01017898	A_55_P2229791	0.761905	0.016
1706	177	A_30_P01017898	A_55_P2297177	0.738095	0.0196
1707	178	A_30_P01017898	A_66_P103894	0.738095	0.0167
1708	179	A_30_P01017898	A_66_P104119	0.904762	0.0013
1709	180	A_30_P01017898	A_66_P105689	0.714286	0.0228
1710	181	A_30_P01017898	A_66_P106388	0.738095	0.0181
1711	182	A_30_P01017898	A_66_P107484	0.738095	0.0173
1712	183	A_30_P01017898	A_66_P108088	0.857143	0.0037
1713	184	A_30_P01017898	A_66_P108214	0.857143	0.0038
1714	185	A_30_P01017898	A_66_P112641	0.761905	0.0137
1715	186	A_30_P01017898	A_66_P116683	0.809524	0.0097
1716	187	A_30_P01017898	A_66_P119968	0.880952	0.0015
1717	188	A_30_P01017898	A_66_P121086	0.928571	0.0008
1718	189	A_30_P01017898	A_66_P123357	0.857143	0.0031
1719	190	A_30_P01017898	A_66_P132295	0.809524	0.0061
1720	191	A_30_P01017898	ERCC-00123_60	0.761905	0.0149
1721	192	A_30_P01017898	A_51_P133097	-0.785714	0.0106
1722	193	A_30_P01017898	A_51_P157802	-0.738095	0.0189
1723	194	A_30_P01017898	A_51_P230439	-0.809524	0.0077
1724	195	A_30_P01017898	A_51_P256224	-0.952381	0.0004
1725	196	A_30_P01017898	A_51_P272553	-0.785714	0.0122
1726	197	A_30_P01017898	A_51_P288916	-0.714286	0.0192
1727	198	A_30_P01017898	A_51_P337918	-0.809524	0.0081
1728	199	A_30_P01017898	A_51_P362176	-0.809524	0.009
1729	200	A_30_P01017898	A_51_P365318	-0.880952	0.0025
1730	201	A_30_P01017898	A_51_P424959	-0.833333	0.005
1731	202	A_30_P01017898	A_51_P428483	-0.785714	0.0122
1732	203	A_30_P01017898	A_52_P20765	-0.809524	0.0067
1733	204	A_30_P01017898	A_52_P227267	-0.809524	0.0087
1734	205	A_30_P01017898	A_52_P322421	-0.904762	0.0006
1735	206	A_30_P01017898	A_52_P468683	-0.904762	0.001
1736	207	A_30_P01017898	A_52_P480266	-0.928571	0.0005
1737	208	A_30_P01017898	A_52_P932421	-0.833333	0.0062
1738	209	A_30_P01017898	A_55_P1957618	-0.928571	0.0005
1739	210	A_30_P01017898	A_55_P1966690	-0.952381	0.0003
1740	211	A_30_P01017898	A_55_P1971154	-0.738095	0.0167
1741	212	A_30_P01017898	A_55_P1972710	-0.809524	0.0081
1742	213	A_30_P01017898	A_55_P1978028	-0.857143	0.004
1743	214	A_30_P01017898	A_55_P1989728	-0.97619	0
1744	215	A_30_P01017898	A_55_P1999800	-0.714286	0.0237
1745	216	A_30_P01017898	A_55_P2006808	-0.738095	0.0182
1746	217	A_30_P01017898	A_55_P2009905	-0.880952	0.0022
1747	218	A_30_P01017898	A_55_P2022629	-0.809524	0.0073
1748	219	A_30_P01017898	A_55_P2030160	-0.785714	0.0103
1749	220	A_30_P01017898	A_55_P2039038	-0.809524	0.0072
1750	221	A_30_P01017898	A_55_P2049261	-0.833333	0.0045
1751	222	A_30_P01017898	A_55_P2050169	-0.761905	0.0141
1752	223	A_30_P01017898	A_55_P2055742	-0.928571	0.0006
1753	224	A_30_P01017898	A_55_P2077153	-0.809524	0.0079
1754	225	A_30_P01017898	A_55_P2077988	-0.833333	0.0076
1755	226	A_30_P01017898	A_55_P2084890	-0.97619	0
1756	227	A_30_P01017898	A_55_P2111163	-0.809524	0.0077
1757	228	A_30_P01017898	A_55_P2114651	-0.714286	0.0218
1758	229	A_30_P01017898	A_55_P2129077	-0.690476	0.0242
1759	230	A_30_P01017898	A_55_P2134591	-0.738095	0.019
1760	231	A_30_P01017898	A_55_P2156993	-0.785714	0.0113
1761	232	A_30_P01017898	A_55_P2176150	-0.785714	0.0091
1762	233	A_30_P01017898	A_55_P2194958	-0.785714	0.0091
1763	234	A_30_P01017898	A_55_P2211937	-0.738095	0.019
1764	235	A_30_P01017898	A_55_P2256586	-0.857143	0.003
1765	236	A_30_P01017898	A_55_P2316612	-0.928571	0.0011
1766	237	A_30_P01017898	A_55_P2349243	-0.833333	0.0056
1767	238	A_30_P01017898	A_55_P2365902	-0.97619	0
1768	239	A_30_P01017898	A_55_P2392485	-0.738095	0.0165
1769	240	A_30_P01017898	A_66_P131433	-0.880952	0.0021
1770	241	A_30_P01017898	A_66_P136193	-0.761905	0.0145
1771	242	A_30_P01017898	A_66_P138072	-0.714286	0.0197
1772	1	A_30_P01017970	A_51_P149714	0.738095	0.0212
1773	2	A_30_P01017970	A_51_P161021	0.714286	0.0222
1774	3	A_30_P01017970	A_51_P162144	0.714286	0.0215
1775	4	A_30_P01017970	A_51_P193146	0.738095	0.0195
1776	5	A_30_P01017970	A_51_P284526	0.785714	0.0126
1777	6	A_30_P01017970	A_51_P324742	0.833333	0.0049
1778	7	A_30_P01017970	A_51_P364210	0.761905	0.0143
1779	8	A_30_P01017970	A_51_P372393	0.880952	0.0024
1780	9	A_30_P01017970	A_51_P401501	0.785714	0.0112
1781	10	A_30_P01017970	A_51_P410205	0.738095	0.0182
1782	11	A_30_P01017970	A_51_P448971	0.857143	0.0039
1783	12	A_30_P01017970	A_51_P464703	0.809524	0.0084
1784	13	A_30_P01017970	A_51_P472867	0.833333	0.0058
1785	14	A_30_P01017970	A_51_P485405	0.833333	0.0044
1786	15	A_30_P01017970	A_51_P505914	0.738095	0.0177
1787	16	A_30_P01017970	A_52_P130639	0.833333	0.0052
1788	17	A_30_P01017970	A_52_P156734	0.809524	0.0081
1789	18	A_30_P01017970	A_52_P167382	0.714286	0.0243
1790	19	A_30_P01017970	A_52_P208416	0.714286	0.0234
1791	20	A_30_P01017970	A_52_P31510	0.809524	0.0084
1792	21	A_30_P01017970	A_52_P31641	0.738095	0.0186
1793	22	A_30_P01017970	A_52_P380710	0.833333	0.0053
1794	23	A_30_P01017970	A_52_P388836	0.785714	0.0099
1795	24	A_30_P01017970	A_52_P408757	0.738095	0.0203
1796	25	A_30_P01017970	A_52_P462949	0.809524	0.0086
1797	26	A_30_P01017970	A_52_P464228	0.714286	0.0237
1798	27	A_30_P01017970	A_52_P465946	0.809524	0.0079
1799	28	A_30_P01017970	A_52_P526513	0.833333	0.0046
1800	29	A_30_P01017970	A_52_P528240	0.880952	0.0021
1801	30	A_30_P01017970	A_52_P616356	0.785714	0.0105
1802	31	A_30_P01017970	A_55_P1952935	0.785714	0.0107
1803	32	A_30_P01017970	A_55_P1954658	0.880952	0.0028
1804	33	A_30_P01017970	A_55_P1959891	0.952381	0.0002
1805	34	A_30_P01017970	A_55_P1960246	0.714286	0.0227
1806	35	A_30_P01017970	A_55_P1966070	0.738095	0.0178
1807	36	A_30_P01017970	A_55_P1969610	0.738095	0.018
1808	37	A_30_P01017970	A_55_P1974577	0.738095	0.0196
1809	38	A_30_P01017970	A_55_P1974751	0.714286	0.024
1810	39	A_30_P01017970	A_55_P1975166	0.785714	0.0104
1811	40	A_30_P01017970	A_55_P1982147	0.880952	0.002
1812	41	A_30_P01017970	A_55_P1984607	0.880952	0.0026
1813	42	A_30_P01017970	A_55_P1986883	0.880952	0.0019
1814	43	A_30_P01017970	A_55_P1986907	0.738095	0.0178
1815	44	A_30_P01017970	A_55_P1987117	0.714286	0.0246
1816	45	A_30_P01017970	A_55_P1991812	0.809524	0.0092
1817	46	A_30_P01017970	A_55_P1994569	0.761905	0.0131
1818	47	A_30_P01017970	A_55_P1995337	0.809524	0.0079
1819	48	A_30_P01017970	A_55_P1997534	0.833333	0.0049
1820	49	A_30_P01017970	A_55_P2001489	0.880952	0.003
1821	50	A_30_P01017970	A_55_P2003497	0.809524	0.0085
1822	51	A_30_P01017970	A_55_P2005512	0.785714	0.0088
1823	52	A_30_P01017970	A_55_P2012101	0.904762	0.0009
1824	53	A_30_P01017970	A_55_P2012293	0.880952	0.0025
1825	54	A_30_P01017970	A_55_P2016471	0.809524	0.0073
1826	55	A_30_P01017970	A_55_P2022631	0.714286	0.0209
1827	56	A_30_P01017970	A_55_P2024054	0.761905	0.0173
1828	57	A_30_P01017970	A_55_P2024125	0.809524	0.0072
1829	58	A_30_P01017970	A_55_P2034507	0.785714	0.0092
1830	59	A_30_P01017970	A_55_P2034938	0.761905	0.0121
1831	60	A_30_P01017970	A_55_P2038262	0.714286	0.0225
1832	61	A_30_P01017970	A_55_P2042606	0.857143	0.0034
1833	62	A_30_P01017970	A_55_P2044922	0.833333	0.0057
1834	63	A_30_P01017970	A_55_P2047480	0.809524	0.0062
1835	64	A_30_P01017970	A_55_P2048550	0.738095	0.0187
1836	65	A_30_P01017970	A_55_P2048912	0.714286	0.023
1837	66	A_30_P01017970	A_55_P2050360	0.857143	0.0047
1838	67	A_30_P01017970	A_55_P2056443	0.880952	0.0023
1839	68	A_30_P01017970	A_55_P2056861	0.738095	0.0184
1840	69	A_30_P01017970	A_55_P2057494	0.785714	0.0111
1841	70	A_30_P01017970	A_55_P2065494	0.904762	0.0008
1842	71	A_30_P01017970	A_55_P2067787	0.761905	0.0144
1843	72	A_30_P01017970	A_55_P2067971	0.738095	0.0202
1844	73	A_30_P01017970	A_55_P2071142	0.928571	0.0007
1845	74	A_30_P01017970	A_55_P2075874	0.738095	0.0179
1846	75	A_30_P01017970	A_55_P2080074	0.761905	0.0152
1847	76	A_30_P01017970	A_55_P2080799	0.785714	0.0089
1848	77	A_30_P01017970	A_55_P2083186	0.833333	0.0043
1849	78	A_30_P01017970	A_55_P2086433	0.738095	0.0192
1850	79	A_30_P01017970	A_55_P2087448	0.880952	0.0026
1851	80	A_30_P01017970	A_55_P2092791	0.738095	0.018
1852	81	A_30_P01017970	A_55_P2095311	0.833333	0.0037
1853	82	A_30_P01017970	A_55_P2103937	0.738095	0.0194
1854	83	A_30_P01017970	A_55_P2107140	0.809524	0.0066
1855	84	A_30_P01017970	A_55_P2107352	0.738095	0.0208
1856	85	A_30_P01017970	A_55_P2109407	0.714286	0.0238
1857	86	A_30_P01017970	A_55_P2112787	0.738095	0.018
1858	87	A_30_P01017970	A_55_P2119287	0.761905	0.014
1859	88	A_30_P01017970	A_55_P2120232	0.785714	0.011
1860	89	A_30_P01017970	A_55_P2121623	0.761905	0.0145
1861	90	A_30_P01017970	A_55_P2122896	0.904762	0.0011
1862	91	A_30_P01017970	A_55_P2127112	0.809524	0.0077
1863	92	A_30_P01017970	A_55_P2127215	0.857143	0.0041
1864	93	A_30_P01017970	A_55_P2135017	0.857143	0.0042
1865	94	A_30_P01017970	A_55_P2139356	0.857143	0.0034
1866	95	A_30_P01017970	A_55_P2142650	0.809524	0.0063
1867	96	A_30_P01017970	A_55_P2147245	0.714286	0.0201
1868	97	A_30_P01017970	A_55_P2149641	0.833333	0.0055
1869	98	A_30_P01017970	A_55_P2151991	0.714286	0.0197
1870	99	A_30_P01017970	A_55_P2152699	0.738095	0.0181
1871	100	A_30_P01017970	A_55_P2156006	0.761905	0.0153
1872	101	A_30_P01017970	A_55_P2159315	0.714286	0.021
1873	102	A_30_P01017970	A_55_P2166708	0.880952	0.0024
1874	103	A_30_P01017970	A_55_P2172663	0.833333	0.0057
1875	104	A_30_P01017970	A_55_P2173210	0.857143	0.0039
1876	105	A_30_P01017970	A_55_P2176332	0.761905	0.012
1877	106	A_30_P01017970	A_55_P2177073	0.809524	0.0062
1878	107	A_30_P01017970	A_55_P2185875	0.785714	0.012
1879	108	A_30_P01017970	A_55_P2187211	0.714286	0.0226
1880	109	A_30_P01017970	A_55_P2196180	0.928571	0.001
1881	110	A_30_P01017970	A_55_P2256019	0.714286	0.0248
1882	111	A_30_P01017970	A_55_P2259964	0.904762	0.0013
1883	112	A_30_P01017970	A_55_P2367350	0.833333	0.0057
1884	113	A_30_P01017970	A_65_P18756	0.880952	0.0021
1885	114	A_30_P01017970	A_66_P101366	0.785714	0.0113
1886	115	A_30_P01017970	A_66_P103894	0.785714	0.0109
1887	116	A_30_P01017970	A_66_P108214	0.738095	0.0162
1888	117	A_30_P01017970	A_66_P110167	0.904762	0.0008
1889	118	A_30_P01017970	A_66_P112641	0.928571	0.001
1890	119	A_30_P01017970	A_66_P120970	0.761905	0.0142
1891	120	A_30_P01017970	A_66_P123357	0.809524	0.0075
1892	121	A_30_P01017970	A_66_P138662	0.809524	0.0078
1893	122	A_30_P01017970	A_51_P193173	-0.785714	0.0113
1894	123	A_30_P01017970	A_51_P256224	-0.809524	0.0084
1895	124	A_30_P01017970	A_51_P272553	-0.904762	0.0006
1896	125	A_30_P01017970	A_55_P1980292	-0.738095	0.0176
1897	126	A_30_P01017970	A_55_P1991164	-0.857143	0.0031
1898	127	A_30_P01017970	A_55_P1997465	-0.809524	0.0078
1899	128	A_30_P01017970	A_55_P2071354	-0.738095	0.0189
1900	129	A_30_P01017970	A_55_P2073248	-0.809524	0.0053
1901	130	A_30_P01017970	A_55_P2103541	-0.785714	0.011
1902	1	A_30_P01018034	A_51_P111962	0.928571	0.0007
1903	2	A_30_P01018034	A_51_P161021	0.761905	0.0145
1904	3	A_30_P01018034	A_51_P169745	0.904762	0.0016
1905	4	A_30_P01018034	A_51_P175667	0.809524	0.007
1906	5	A_30_P01018034	A_51_P179504	0.880952	0.0025
1907	6	A_30_P01018034	A_51_P208160	0.904762	0.0013
1908	7	A_30_P01018034	A_51_P209280	0.738095	0.0168
1909	8	A_30_P01018034	A_51_P225224	1	0
1910	9	A_30_P01018034	A_51_P227222	0.97619	0
1911	10	A_30_P01018034	A_51_P232649	0.952381	0.0002
1912	11	A_30_P01018034	A_51_P295085	0.952381	0.0005
1913	12	A_30_P01018034	A_51_P364871	0.857143	0.0034
1914	13	A_30_P01018034	A_51_P372393	0.761905	0.0133
1915	14	A_30_P01018034	A_51_P385803	0.761905	0.0132
1916	15	A_30_P01018034	A_51_P405476	0.714286	0.0246
1917	16	A_30_P01018034	A_51_P441426	0.857143	0.0027
1918	17	A_30_P01018034	A_51_P448971	0.738095	0.0184
1919	18	A_30_P01018034	A_51_P455338	0.809524	0.0075
1920	19	A_30_P01018034	A_51_P461779	0.785714	0.0121
1921	20	A_30_P01018034	A_51_P464703	0.785714	0.0123
1922	21	A_30_P01018034	A_51_P468260	0.785714	0.0098
1923	22	A_30_P01018034	A_52_P161237	0.809524	0.0077
1924	23	A_30_P01018034	A_52_P22617	0.833333	0.0049
1925	24	A_30_P01018034	A_52_P300445	0.714286	0.0225
1926	25	A_30_P01018034	A_52_P31641	0.928571	0.0007
1927	26	A_30_P01018034	A_52_P320261	0.738095	0.0161
1928	27	A_30_P01018034	A_52_P333063	0.857143	0.0035
1929	28	A_30_P01018034	A_52_P345261	0.880952	0.0023
1930	29	A_30_P01018034	A_52_P380710	0.785714	0.0114
1931	30	A_30_P01018034	A_52_P385736	0.761905	0.0164
1932	31	A_30_P01018034	A_52_P393738	0.833333	0.0062
1933	32	A_30_P01018034	A_52_P412585	0.714286	0.02
1934	33	A_30_P01018034	A_52_P464228	0.714286	0.02
1935	34	A_30_P01018034	A_52_P469789	0.952381	0.0001
1936	35	A_30_P01018034	A_52_P494564	0.833333	0.0054
1937	36	A_30_P01018034	A_52_P541161	0.809524	0.0082
1938	37	A_30_P01018034	A_52_P602669	0.785714	0.0118
1939	38	A_30_P01018034	A_55_P1952618	0.738095	0.0185
1940	39	A_30_P01018034	A_55_P1953823	0.97619	0
1941	40	A_30_P01018034	A_55_P1954658	0.761905	0.0143
1942	41	A_30_P01018034	A_55_P1960246	0.714286	0.0241
1943	42	A_30_P01018034	A_55_P1961943	0.714286	0.0218
1944	43	A_30_P01018034	A_55_P1965363	0.857143	0.0034
1945	44	A_30_P01018034	A_55_P1966070	0.738095	0.0198
1946	45	A_30_P01018034	A_55_P1966450	0.714286	0.0211
1947	46	A_30_P01018034	A_55_P1966755	0.714286	0.0229
1948	47	A_30_P01018034	A_55_P1970349	0.714286	0.0213
1949	48	A_30_P01018034	A_55_P1974751	0.738095	0.0205
1950	49	A_30_P01018034	A_55_P1975166	0.857143	0.0038
1951	50	A_30_P01018034	A_55_P1976714	0.904762	0.0009
1952	51	A_30_P01018034	A_55_P1976949	0.714286	0.0218
1953	52	A_30_P01018034	A_55_P1977042	0.738095	0.0187
1954	53	A_30_P01018034	A_55_P1979753	0.714286	0.0227
1955	54	A_30_P01018034	A_55_P1980486	0.738095	0.0196
1956	55	A_30_P01018034	A_55_P1981167	0.809524	0.0076
1957	56	A_30_P01018034	A_55_P1982147	0.714286	0.0237
1958	57	A_30_P01018034	A_55_P1984607	0.738095	0.021
1959	58	A_30_P01018034	A_55_P1986883	0.738095	0.0199
1960	59	A_30_P01018034	A_55_P1988108	0.833333	0.0065
1961	60	A_30_P01018034	A_55_P1988310	0.714286	0.0208
1962	61	A_30_P01018034	A_55_P1995104	0.904762	0.0011
1963	62	A_30_P01018034	A_55_P1997534	0.761905	0.0164
1964	63	A_30_P01018034	A_55_P1998843	0.761905	0.0131
1965	64	A_30_P01018034	A_55_P2000688	0.904762	0.0014
1966	65	A_30_P01018034	A_55_P2002727	0.738095	0.0162
1967	66	A_30_P01018034	A_55_P2003497	0.809524	0.0079
1968	67	A_30_P01018034	A_55_P2003638	0.880952	0.0023
1969	68	A_30_P01018034	A_55_P2004786	0.809524	0.0097
1970	69	A_30_P01018034	A_55_P2005512	0.785714	0.0094
1971	70	A_30_P01018034	A_55_P2012702	0.880952	0.0023
1972	71	A_30_P01018034	A_55_P2013038	0.952381	0.0005
1973	72	A_30_P01018034	A_55_P2017914	0.738095	0.0182
1974	73	A_30_P01018034	A_55_P2018934	0.809524	0.0077
1975	74	A_30_P01018034	A_55_P2026139	0.880952	0.0028
1976	75	A_30_P01018034	A_55_P2026458	0.761905	0.0125
1977	76	A_30_P01018034	A_55_P2026460	0.928571	0.0001
1978	77	A_30_P01018034	A_55_P2028542	0.714286	0.0242
1979	78	A_30_P01018034	A_55_P2030229	0.928571	0.0005
1980	79	A_30_P01018034	A_55_P2032167	0.738095	0.0178
1981	80	A_30_P01018034	A_55_P2034320	0.904762	0.0015
1982	81	A_30_P01018034	A_55_P2039684	0.714286	0.0246
1983	82	A_30_P01018034	A_55_P2040081	0.857143	0.0031
1984	83	A_30_P01018034	A_55_P2041976	0.809524	0.0095
1985	84	A_30_P01018034	A_55_P2047480	0.785714	0.0121
1986	85	A_30_P01018034	A_55_P2047768	0.904762	0.0007
1987	86	A_30_P01018034	A_55_P2049944	0.880952	0.002
1988	87	A_30_P01018034	A_55_P2050722	0.857143	0.0045
1989	88	A_30_P01018034	A_55_P2055834	0.833333	0.0049
1990	89	A_30_P01018034	A_55_P2057076	0.880952	0.0014
1991	90	A_30_P01018034	A_55_P2057489	0.761905	0.014
1992	91	A_30_P01018034	A_55_P2064523	0.904762	0.0007
1993	92	A_30_P01018034	A_55_P2064702	0.809524	0.0087
1994	93	A_30_P01018034	A_55_P2066727	0.952381	0
1995	94	A_30_P01018034	A_55_P2067747	0.880952	0.0024
1996	95	A_30_P01018034	A_55_P2071940	0.761905	0.0127
1997	96	A_30_P01018034	A_55_P2072666	0.785714	0.0133
1998	97	A_30_P01018034	A_55_P2076891	0.714286	0.0238
[truncated: 56,754 more rows]

## Sheet: BALBc_Wk8
Table S4. Correlations between lncRNA and coding RNA expression in BALB/c and SPRET/EiJ mammary tissues after LDIR exposure.
Correlation #	Coding RNA #	Linc RNA	Coding RNA	correlation	p-value				Unique Linc RNA
1	1	A_30_P01019221	A_51_P239654	0.904762	0.001				A_30_P01019221
2	2	A_30_P01019221	A_52_P128134	0.904762	0.0019				A_30_P01019315
3	3	A_30_P01019221	A_52_P31543	0.928571	0.0007				A_30_P01020325
4	4	A_30_P01019221	A_55_P1988043	-0.833333	0.0053				A_30_P01020468
5	5	A_30_P01019221	A_55_P2021505	0.809524	0.0074				A_30_P01021067
6	6	A_30_P01019221	A_55_P2027152	-0.761905	0.0154				A_30_P01022023
7	7	A_30_P01019221	A_55_P2095727	0.738095	0.0182				A_30_P01022791
8	8	A_30_P01019221	A_55_P2111790	0.785714	0.0119				A_30_P01022806
9	9	A_30_P01019221	A_55_P2113051	0.857143	0.0045				A_30_P01024854
10	10	A_30_P01019221	A_55_P2169227	0.738095	0.0208				A_30_P01025428
11	11	A_30_P01019221	A_66_P122621	0.880952	0.0021				A_30_P01027671
12	12	A_30_P01019221	A_51_P173678	0.761905	0.0138				A_30_P01028538
13	13	A_30_P01019221	A_51_P205524	-0.738095	0.0188				A_30_P01029142
14	14	A_30_P01019221	A_51_P225484	0.880952	0.0022				A_30_P01029484
15	15	A_30_P01019221	A_52_P8459	0.714286	0.0239				A_30_P01030791
16	16	A_30_P01019221	A_55_P1976972	0.857143	0.0047				A_30_P01031072
17	17	A_30_P01019221	A_55_P1993876	0.809524	0.0094				A_30_P01033638
18	18	A_30_P01019221	A_55_P1998641	-0.738095	0.0201				A_30_P01017540
19	19	A_30_P01019221	A_55_P2003048	0.785714	0.0102				A_30_P01017656
20	20	A_30_P01019221	A_55_P2011877	-0.785714	0.0121				A_30_P01017677
21	21	A_30_P01019221	A_55_P2015074	0.714286	0.0245				A_30_P01017838
22	22	A_30_P01019221	A_55_P2032553	-0.785714	0.0108				A_30_P01018096
23	23	A_30_P01019221	A_55_P2042096	-0.761905	0.0144				A_30_P01018099
24	24	A_30_P01019221	A_55_P2127482	0.738095	0.0184				A_30_P01018335
25	25	A_30_P01019221	A_55_P2165210	-0.714286	0.0245				A_30_P01018465
26	26	A_30_P01019221	A_55_P2305623	-0.738095	0.016				A_30_P01018678
27	27	A_30_P01019221	A_55_P2305900	0.761905	0.0147				A_30_P01018907
28	28	A_30_P01019221	A_55_P2423518	-0.738095	0.0156				A_30_P01019061
29	1	A_30_P01019315	A_51_P239654	-0.904762	0.0013				A_30_P01019119
30	2	A_30_P01019315	A_52_P128134	-0.904762	0.0009				A_30_P01019171
31	3	A_30_P01019315	A_52_P311148	-0.785714	0.0121				A_30_P01019388
32	4	A_30_P01019315	A_52_P31543	-0.857143	0.0049				A_30_P01019524
33	5	A_30_P01019315	A_55_P1993168	0.785714	0.0106				A_30_P01019533
34	6	A_30_P01019315	A_55_P2021505	-0.714286	0.0223				A_30_P01019576
35	7	A_30_P01019315	A_55_P2029289	0.833333	0.0037				A_30_P01019584
36	8	A_30_P01019315	A_55_P2111790	-0.97619	0.0001				A_30_P01019738
37	9	A_30_P01019315	A_55_P2113051	-0.880952	0.0017				A_30_P01019745
38	10	A_30_P01019315	A_55_P2119683	0.761905	0.0136				A_30_P01019875
39	11	A_30_P01019315	A_55_P2136880	-0.857143	0.0028				A_30_P01019966
40	12	A_30_P01019315	A_55_P2393543	0.761905	0.0135				A_30_P01020056
41	13	A_30_P01019315	A_51_P173678	-1	0				A_30_P01020129
42	14	A_30_P01019315	A_51_P201308	-0.761905	0.014				A_30_P01020159
43	15	A_30_P01019315	A_51_P213476	0.738095	0.0192				A_30_P01020188
44	16	A_30_P01019315	A_51_P225484	-0.714286	0.0244				A_30_P01020338
45	17	A_30_P01019315	A_51_P278653	-0.714286	0.0216				A_30_P01020352
46	18	A_30_P01019315	A_51_P372743	-0.880952	0.0025				A_30_P01020378
47	19	A_30_P01019315	A_51_P398089	-0.785714	0.0098				A_30_P01020427
48	20	A_30_P01019315	A_51_P447189	0.714286	0.0238				A_30_P01020451
49	21	A_30_P01019315	A_52_P258557	-0.928571	0.0003				A_30_P01020525
50	22	A_30_P01019315	A_52_P425839	-0.833333	0.0045				A_30_P01020561
51	23	A_30_P01019315	A_52_P482897	0.785714	0.0094				A_30_P01020694
52	24	A_30_P01019315	A_52_P62444	0.761905	0.0134				A_30_P01020735
53	25	A_30_P01019315	A_52_P63855	0.761905	0.014				A_30_P01020772
54	26	A_30_P01019315	A_55_P1952284	-0.761905	0.0166				A_30_P01020779
55	27	A_30_P01019315	A_55_P1952379	-0.857143	0.0038				A_30_P01020843
56	28	A_30_P01019315	A_55_P1962364	-0.785714	0.0107				A_30_P01020857
57	29	A_30_P01019315	A_55_P1968340	0.714286	0.0236				A_30_P01020924
58	30	A_30_P01019315	A_55_P1976972	-0.809524	0.0067				A_30_P01021179
59	31	A_30_P01019315	A_55_P1990200	-0.904762	0.0012				A_30_P01021219
60	32	A_30_P01019315	A_55_P1993876	-0.809524	0.0079				A_30_P01021232
61	33	A_30_P01019315	A_55_P2003048	-0.738095	0.018				A_30_P01021318
62	34	A_30_P01019315	A_55_P2014511	0.714286	0.0231				A_30_P01021322
63	35	A_30_P01019315	A_55_P2015074	-0.952381	0				A_30_P01021389
64	36	A_30_P01019315	A_55_P2018407	0.761905	0.0164				A_30_P01021409
65	37	A_30_P01019315	A_55_P2040485	-0.761905	0.0145				A_30_P01021430
66	38	A_30_P01019315	A_55_P2043277	-0.857143	0.0039				A_30_P01021438
67	39	A_30_P01019315	A_55_P2086323	-0.738095	0.0175				A_30_P01021457
68	40	A_30_P01019315	A_55_P2130249	-0.714286	0.0221				A_30_P01021466
69	41	A_30_P01019315	A_55_P2131481	0.880952	0.0023				A_30_P01021475
70	42	A_30_P01019315	A_55_P2133007	0.785714	0.0103				A_30_P01021548
71	43	A_30_P01019315	A_55_P2176953	-0.761905	0.0134				A_30_P01021622
72	44	A_30_P01019315	A_55_P2195187	-0.761905	0.0158				A_30_P01021904
73	45	A_30_P01019315	A_55_P2266285	0.714286	0.0231				A_30_P01022030
74	46	A_30_P01019315	A_55_P2269819	-0.904762	0.0007				A_30_P01022184
75	47	A_30_P01019315	A_55_P2284273	0.714286	0.0245				A_30_P01022233
76	48	A_30_P01019315	A_55_P2311591	-0.857143	0.0025				A_30_P01022277
77	49	A_30_P01019315	A_55_P2330069	0.738095	0.0205				A_30_P01022306
78	50	A_30_P01019315	A_55_P2341667	0.714286	0.024				A_30_P01022355
79	51	A_30_P01019315	A_55_P2346659	-0.880952	0.0029				A_30_P01022455
80	52	A_30_P01019315	A_55_P2380900	0.738095	0.0164				A_30_P01022480
81	53	A_30_P01019315	A_55_P2423518	0.928571	0.0006				A_30_P01022579
82	1	A_30_P01020325	A_51_P239654	0.904762	0.0005				A_30_P01022695
83	2	A_30_P01020325	A_52_P128134	0.904762	0.0012				A_30_P01022881
84	3	A_30_P01020325	A_52_P31543	0.928571	0.0008				A_30_P01022883
85	4	A_30_P01020325	A_55_P1988043	-0.833333	0.0061				A_30_P01022922
86	5	A_30_P01020325	A_55_P2021505	0.809524	0.0063				A_30_P01022954
87	6	A_30_P01020325	A_55_P2027152	-0.761905	0.0146				A_30_P01023028
88	7	A_30_P01020325	A_55_P2095727	0.738095	0.0202				A_30_P01023155
89	8	A_30_P01020325	A_55_P2111790	0.785714	0.0101				A_30_P01023183
90	9	A_30_P01020325	A_55_P2113051	0.857143	0.0024				A_30_P01023194
91	10	A_30_P01020325	A_55_P2169227	0.738095	0.0162				A_30_P01023240
92	11	A_30_P01020325	A_66_P122621	0.880952	0.003				A_30_P01023278
93	12	A_30_P01020325	A_51_P173678	0.761905	0.0143				A_30_P01023374
94	13	A_30_P01020325	A_51_P205524	-0.738095	0.0209				A_30_P01023476
95	14	A_30_P01020325	A_51_P225484	0.880952	0.0019				A_30_P01023557
96	15	A_30_P01020325	A_52_P8459	0.714286	0.0211				A_30_P01023603
97	16	A_30_P01020325	A_55_P1976972	0.857143	0.0054				A_30_P01023629
98	17	A_30_P01020325	A_55_P1993876	0.809524	0.0067				A_30_P01023711
99	18	A_30_P01020325	A_55_P1998641	-0.738095	0.0173				A_30_P01023866
100	19	A_30_P01020325	A_55_P2003048	0.785714	0.0103				A_30_P01024060
101	20	A_30_P01020325	A_55_P2011877	-0.785714	0.0126				A_30_P01024098
102	21	A_30_P01020325	A_55_P2015074	0.714286	0.0232				A_30_P01024110
103	22	A_30_P01020325	A_55_P2032553	-0.785714	0.0102				A_30_P01024160
104	23	A_30_P01020325	A_55_P2042096	-0.761905	0.0144				A_30_P01024187
105	24	A_30_P01020325	A_55_P2127482	0.738095	0.0183				A_30_P01024203
106	25	A_30_P01020325	A_55_P2165210	-0.714286	0.0238				A_30_P01024221
107	26	A_30_P01020325	A_55_P2305623	-0.738095	0.0183				A_30_P01024235
108	27	A_30_P01020325	A_55_P2305900	0.761905	0.0148				A_30_P01024420
109	28	A_30_P01020325	A_55_P2423518	-0.738095	0.0166				A_30_P01024477
110	1	A_30_P01020468	A_51_P153683	0.714286	0.0225				A_30_P01024518
111	2	A_30_P01020468	A_52_P326664	0.738095	0.0188				A_30_P01024520
112	3	A_30_P01020468	A_55_P1962551	0.761905	0.015				A_30_P01024577
113	4	A_30_P01020468	A_55_P1977431	0.738095	0.0185				A_30_P01024620
114	5	A_30_P01020468	A_55_P2037081	0.761905	0.0145				A_30_P01024675
115	6	A_30_P01020468	A_55_P2153461	0.761905	0.014				A_30_P01024698
116	7	A_30_P01020468	A_51_P131119	-0.761905	0.0145				A_30_P01024859
117	8	A_30_P01020468	A_51_P215190	-0.738095	0.019				A_30_P01024863
118	9	A_30_P01020468	A_51_P315144	-0.761905	0.0134				A_30_P01024868
119	10	A_30_P01020468	A_51_P376445	-0.714286	0.0217				A_30_P01025060
120	11	A_30_P01020468	A_51_P398089	-0.761905	0.0132				A_30_P01025067
121	12	A_30_P01020468	A_51_P505967	-0.714286	0.0241				A_30_P01025157
122	13	A_30_P01020468	A_52_P1124229	-0.714286	0.0222				A_30_P01025243
123	14	A_30_P01020468	A_52_P125485	-0.738095	0.0209				A_30_P01025246
124	15	A_30_P01020468	A_52_P322474	-0.857143	0.0035				A_30_P01025274
125	16	A_30_P01020468	A_52_P576188	-0.714286	0.0219				A_30_P01025310
126	17	A_30_P01020468	A_55_P1962364	-0.714286	0.0238				A_30_P01025439
127	18	A_30_P01020468	A_55_P1976589	-0.738095	0.0199				A_30_P01025510
128	19	A_30_P01020468	A_55_P1990341	-0.833333	0.0057				A_30_P01025604
129	20	A_30_P01020468	A_55_P2008403	-0.738095	0.0174				A_30_P01025613
130	21	A_30_P01020468	A_55_P2009767	-0.714286	0.021				A_30_P01025711
131	22	A_30_P01020468	A_55_P2058275	-0.928571	0.0003				A_30_P01025789
132	23	A_30_P01020468	A_55_P2079475	-0.833333	0.0047				A_30_P01025843
133	24	A_30_P01020468	A_55_P2091297	-0.714286	0.0212				A_30_P01025912
134	25	A_30_P01020468	A_55_P2095663	0.738095	0.0199				A_30_P01026237
135	26	A_30_P01020468	A_55_P2128144	-0.738095	0.0191				A_30_P01026370
136	27	A_30_P01020468	A_55_P2155116	-0.761905	0.0127				A_30_P01026374
137	28	A_30_P01020468	A_55_P2157517	-0.785714	0.011				A_30_P01026405
138	29	A_30_P01020468	A_55_P2176953	-0.809524	0.0086				A_30_P01026439
139	30	A_30_P01020468	A_55_P2195187	-0.928571	0.0005				A_30_P01026509
140	31	A_30_P01020468	A_55_P2269819	-0.738095	0.0163				A_30_P01026578
141	32	A_30_P01020468	A_55_P2346659	-0.738095	0.0185				A_30_P01026632
142	33	A_30_P01020468	A_66_P123538	-0.809524	0.0071				A_30_P01026649
143	34	A_30_P01020468	A_66_P139159	-0.857143	0.0024				A_30_P01026701
144	1	A_30_P01021067	A_52_P326664	0.738095	0.0191				A_30_P01026755
145	2	A_30_P01021067	A_55_P1962551	0.928571	0.0007				A_30_P01026915
146	3	A_30_P01021067	A_55_P2029289	0.880952	0.0022				A_30_P01026988
147	4	A_30_P01021067	A_55_P2111790	-0.785714	0.0093				A_30_P01027013
148	5	A_30_P01021067	A_55_P2113051	-0.809524	0.0075				A_30_P01027026
149	6	A_30_P01021067	A_55_P2119683	0.714286	0.023				A_30_P01027038
150	7	A_30_P01021067	A_55_P2136880	-0.714286	0.0227				A_30_P01027259
151	8	A_30_P01021067	A_55_P2393543	0.714286	0.0243				A_30_P01027305
152	9	A_30_P01021067	A_51_P173678	-0.809524	0.0083				A_30_P01027533
153	10	A_30_P01021067	A_51_P201308	-0.761905	0.0155				A_30_P01027682
154	11	A_30_P01021067	A_51_P215190	-0.809524	0.0083				A_30_P01027708
155	12	A_30_P01021067	A_51_P372743	-0.738095	0.0189				A_30_P01027819
156	13	A_30_P01021067	A_51_P398089	-0.785714	0.0111				A_30_P01027879
157	14	A_30_P01021067	A_52_P258557	-0.809524	0.0081				A_30_P01027923
158	15	A_30_P01021067	A_52_P313185	0.857143	0.0031				A_30_P01027939
159	16	A_30_P01021067	A_52_P425839	-0.761905	0.0142				A_30_P01028200
160	17	A_30_P01021067	A_52_P482897	0.928571	0.001				A_30_P01028202
161	18	A_30_P01021067	A_55_P1954970	0.738095	0.0173				A_30_P01028267
162	19	A_30_P01021067	A_55_P1968340	0.761905	0.0123				A_30_P01028448
163	20	A_30_P01021067	A_55_P1990200	-0.761905	0.0126				A_30_P01028477
164	21	A_30_P01021067	A_55_P2014511	0.880952	0.0023				A_30_P01028661
165	22	A_30_P01021067	A_55_P2015074	-0.904762	0.0014				A_30_P01028664
166	23	A_30_P01021067	A_55_P2040485	-0.714286	0.0217				A_30_P01028693
167	24	A_30_P01021067	A_55_P2043277	-0.857143	0.0051				A_30_P01028721
168	25	A_30_P01021067	A_55_P2067273	0.761905	0.0143				A_30_P01028792
169	26	A_30_P01021067	A_55_P2095663	0.714286	0.0226				A_30_P01028918
170	27	A_30_P01021067	A_55_P2105416	-0.761905	0.0144				A_30_P01028942
171	28	A_30_P01021067	A_55_P2131481	0.809524	0.0069				A_30_P01029129
172	29	A_30_P01021067	A_55_P2133007	0.785714	0.0101				A_30_P01029150
173	30	A_30_P01021067	A_55_P2157517	-0.857143	0.0037				A_30_P01029158
174	31	A_30_P01021067	A_55_P2176953	-0.857143	0.0035				A_30_P01029229
175	32	A_30_P01021067	A_55_P2195187	-0.833333	0.0054				A_30_P01029234
176	33	A_30_P01021067	A_55_P2266285	0.714286	0.0232				A_30_P01029263
177	34	A_30_P01021067	A_55_P2311591	-0.809524	0.0074				A_30_P01029487
178	35	A_30_P01021067	A_55_P2346659	-0.761905	0.0133				A_30_P01029494
179	36	A_30_P01021067	A_55_P2423518	0.761905	0.0128				A_30_P01029509
180	1	A_30_P01022023	A_51_P239654	-0.833333	0.0049				A_30_P01029654
181	2	A_30_P01022023	A_52_P128134	-0.833333	0.0046				A_30_P01029772
182	3	A_30_P01022023	A_52_P311148	-0.714286	0.0247				A_30_P01029794
183	4	A_30_P01022023	A_52_P31543	-0.761905	0.0147				A_30_P01029795
184	5	A_30_P01022023	A_55_P1962551	0.833333	0.0059				A_30_P01029892
185	6	A_30_P01022023	A_55_P2029289	0.761905	0.0154				A_30_P01029926
186	7	A_30_P01022023	A_55_P2111790	-0.904762	0.0011				A_30_P01030005
187	8	A_30_P01022023	A_55_P2113051	-0.880952	0.0017				A_30_P01030200
188	9	A_30_P01022023	A_55_P2119683	0.738095	0.0163				A_30_P01030282
189	10	A_30_P01022023	A_55_P2136880	-0.785714	0.0108				A_30_P01030328
190	11	A_30_P01022023	A_51_P173678	-0.928571	0.0008				A_30_P01030393
191	12	A_30_P01022023	A_51_P372743	-0.738095	0.0194				A_30_P01030426
192	13	A_30_P01022023	A_51_P398089	-0.714286	0.0201				A_30_P01030482
193	14	A_30_P01022023	A_52_P258557	-0.809524	0.0079				A_30_P01030546
194	15	A_30_P01022023	A_52_P313185	0.714286	0.0214				A_30_P01030615
195	16	A_30_P01022023	A_52_P425839	-0.809524	0.0081				A_30_P01030832
196	17	A_30_P01022023	A_52_P482897	0.785714	0.0098				A_30_P01030864
197	18	A_30_P01022023	A_52_P63855	0.738095	0.0171				A_30_P01030903
198	19	A_30_P01022023	A_55_P1952379	-0.785714	0.0113				A_30_P01030904
199	20	A_30_P01022023	A_55_P1968340	0.738095	0.0177				A_30_P01030914
200	21	A_30_P01022023	A_55_P1990200	-0.809524	0.0084				A_30_P01030973
201	22	A_30_P01022023	A_55_P1993876	-0.714286	0.0238				A_30_P01031028
202	23	A_30_P01022023	A_55_P2014511	0.714286	0.0223				A_30_P01031237
203	24	A_30_P01022023	A_55_P2015074	-0.928571	0.0005				A_30_P01031269
204	25	A_30_P01022023	A_55_P2040485	-0.738095	0.0198				A_30_P01031354
205	26	A_30_P01022023	A_55_P2043277	-0.833333	0.0049				A_30_P01031456
206	27	A_30_P01022023	A_55_P2067273	0.714286	0.021				A_30_P01031496
207	28	A_30_P01022023	A_55_P2085989	0.761905	0.0144				A_30_P01031616
208	29	A_30_P01022023	A_55_P2095663	0.785714	0.0109				A_30_P01031656
209	30	A_30_P01022023	A_55_P2131481	0.761905	0.0133				A_30_P01031684
210	31	A_30_P01022023	A_55_P2133007	0.761905	0.013				A_30_P01031785
211	32	A_30_P01022023	A_55_P2176953	-0.761905	0.0144				A_30_P01031855
212	33	A_30_P01022023	A_55_P2195187	-0.857143	0.0034				A_30_P01031975
213	34	A_30_P01022023	A_55_P2269819	-0.833333	0.0055				A_30_P01032174
214	35	A_30_P01022023	A_55_P2311591	-0.738095	0.0186				A_30_P01032234
215	36	A_30_P01022023	A_55_P2346659	-0.857143	0.0033				A_30_P01032346
216	37	A_30_P01022023	A_55_P2423518	0.857143	0.0036				A_30_P01032349
217	1	A_30_P01022791	A_51_P176583	0.714286	0.0222				A_30_P01032534
218	2	A_30_P01022791	A_52_P460836	0.738095	0.0188				A_30_P01032669
219	3	A_30_P01022791	A_52_P598605	-0.809524	0.0082				A_30_P01032750
220	4	A_30_P01022791	A_52_P876147	0.880952	0.0028				A_30_P01032757
221	5	A_30_P01022791	A_55_P1977431	0.714286	0.0226				A_30_P01032826
222	6	A_30_P01022791	A_55_P2091274	0.761905	0.0143				A_30_P01032866
223	7	A_30_P01022791	A_55_P2131328	0.785714	0.011				A_30_P01033016
224	8	A_30_P01022791	A_55_P2153461	0.761905	0.0146				A_30_P01033046
225	9	A_30_P01022791	A_55_P2153740	0.714286	0.0223				A_30_P01033071
226	10	A_30_P01022791	A_55_P2162825	0.738095	0.0171				A_30_P01033078
227	11	A_30_P01022791	A_51_P114817	-0.714286	0.0228				A_30_P01033122
228	12	A_30_P01022791	A_51_P315144	-0.714286	0.0228				A_30_P01033141
229	13	A_30_P01022791	A_52_P1044655	-0.833333	0.0057				A_30_P01033156
230	14	A_30_P01022791	A_52_P1124229	-0.880952	0.0026				A_30_P01033232
231	15	A_30_P01022791	A_52_P125485	-0.785714	0.0114				A_30_P01033363
232	16	A_30_P01022791	A_52_P21951	0.738095	0.0179				A_30_P01033440
233	17	A_30_P01022791	A_52_P62833	0.714286	0.0233				A_30_P01033470
234	18	A_30_P01022791	A_52_P649817	-0.785714	0.0109				A_30_P01033580
235	19	A_30_P01022791	A_52_P820196	0.738095	0.0186				A_30_P01033624
236	20	A_30_P01022791	A_52_P8459	0.809524	0.0076
237	21	A_30_P01022791	A_55_P1953107	-0.809524	0.0076
238	22	A_30_P01022791	A_55_P1965911	0.785714	0.0108
239	23	A_30_P01022791	A_55_P1976589	-0.738095	0.0168
240	24	A_30_P01022791	A_55_P1987970	-0.738095	0.0187
241	25	A_30_P01022791	A_55_P1998641	-0.738095	0.0176
242	26	A_30_P01022791	A_55_P2032553	-0.785714	0.0108
243	27	A_30_P01022791	A_55_P2042096	-0.857143	0.0037
244	28	A_30_P01022791	A_55_P2061025	-0.785714	0.0092
245	29	A_30_P01022791	A_55_P2065815	-0.738095	0.0187
246	30	A_30_P01022791	A_55_P2067321	-0.714286	0.0222
247	31	A_30_P01022791	A_55_P2076215	-0.714286	0.0232
248	32	A_30_P01022791	A_55_P2094108	-0.761905	0.0147
249	33	A_30_P01022791	A_55_P2126002	-0.857143	0.0043
250	34	A_30_P01022791	A_55_P2131452	-0.738095	0.0175
251	35	A_30_P01022791	A_55_P2135895	-0.761905	0.0126
252	36	A_30_P01022791	A_55_P2141686	-0.809524	0.0086
253	37	A_30_P01022791	A_55_P2147200	-0.785714	0.0098
254	38	A_30_P01022791	A_55_P2165210	-0.809524	0.0073
255	39	A_30_P01022791	A_55_P2305623	-0.785714	0.0107
256	40	A_30_P01022791	A_55_P2430367	0.738095	0.0159
257	41	A_30_P01022791	A_66_P116657	-0.857143	0.0045
258	42	A_30_P01022791	A_66_P139159	-0.738095	0.0193
259	43	A_30_P01022791	A_66_P139883	-0.857143	0.0042
260	1	A_30_P01022806	A_51_P168613	0.761905	0.0138
261	2	A_30_P01022806	A_51_P176583	-0.738095	0.0176
262	3	A_30_P01022806	A_52_P598605	0.714286	0.0247
263	4	A_30_P01022806	A_55_P2019683	0.809524	0.0085
264	5	A_30_P01022806	A_51_P131216	-0.785714	0.0094
265	6	A_30_P01022806	A_51_P438781	-0.857143	0.0049
266	7	A_30_P01022806	A_52_P217796	-0.761905	0.0163
267	8	A_30_P01022806	A_52_P21951	-0.761905	0.0158
268	9	A_30_P01022806	A_52_P349694	-0.904762	0.0013
269	10	A_30_P01022806	A_52_P527260	-0.857143	0.0032
270	11	A_30_P01022806	A_52_P598835	-0.904762	0.0013
271	12	A_30_P01022806	A_52_P68087	-0.761905	0.0146
272	13	A_30_P01022806	A_55_P1957294	-0.714286	0.0213
273	14	A_30_P01022806	A_55_P1997135	-0.761905	0.0122
274	15	A_30_P01022806	A_55_P2009640	-0.809524	0.0074
275	16	A_30_P01022806	A_55_P2017681	-0.738095	0.0185
276	17	A_30_P01022806	A_55_P2018407	-0.714286	0.0242
277	18	A_30_P01022806	A_55_P2023285	-0.738095	0.0184
278	19	A_30_P01022806	A_55_P2025538	0.714286	0.0203
279	20	A_30_P01022806	A_55_P2038467	-0.738095	0.0193
280	21	A_30_P01022806	A_55_P2087840	0.761905	0.0155
281	22	A_30_P01022806	A_55_P2104884	-0.738095	0.0184
282	23	A_30_P01022806	A_55_P2106039	-0.904762	0.0015
283	24	A_30_P01022806	A_55_P2115300	-0.857143	0.0035
284	25	A_30_P01022806	A_55_P2166238	-0.904762	0.0011
285	26	A_30_P01022806	A_55_P2179925	-0.904762	0.0008
286	27	A_30_P01022806	A_55_P2273929	-0.714286	0.0207
287	28	A_30_P01022806	A_55_P2284273	-0.714286	0.0225
288	29	A_30_P01022806	A_55_P2295691	-0.809524	0.0078
289	30	A_30_P01022806	A_55_P2339399	-0.738095	0.0179
290	31	A_30_P01022806	A_66_P131994	-0.714286	0.0242
291	32	A_30_P01022806	A_66_P139703	-0.761905	0.015
292	1	A_30_P01024854	A_51_P168613	-0.761905	0.0142
293	2	A_30_P01024854	A_52_P31543	0.785714	0.0121
294	3	A_30_P01024854	A_52_P460836	0.714286	0.0245
295	4	A_30_P01024854	A_52_P598605	-0.714286	0.0242
296	5	A_30_P01024854	A_52_P876147	0.809524	0.0093
297	6	A_30_P01024854	A_55_P2095727	0.880952	0.0023
298	7	A_30_P01024854	A_55_P2131328	0.809524	0.0086
299	8	A_30_P01024854	A_66_P122621	0.785714	0.0113
300	9	A_30_P01024854	A_51_P160581	-0.761905	0.0132
301	10	A_30_P01024854	A_51_P225484	0.928571	0.0008
302	11	A_30_P01024854	A_51_P315144	-0.714286	0.0227
303	12	A_30_P01024854	A_52_P1044655	-0.833333	0.0049
304	13	A_30_P01024854	A_52_P203560	0.785714	0.0132
305	14	A_30_P01024854	A_52_P62833	0.928571	0.0003
306	15	A_30_P01024854	A_52_P8459	0.904762	0.0009
307	16	A_30_P01024854	A_55_P1965911	0.857143	0.0034
308	17	A_30_P01024854	A_55_P1976972	0.833333	0.0058
309	18	A_30_P01024854	A_55_P1977402	-0.738095	0.0181
310	19	A_30_P01024854	A_55_P1984881	0.833333	0.0052
311	20	A_30_P01024854	A_55_P1998641	-0.833333	0.0053
312	21	A_30_P01024854	A_55_P2000489	0.738095	0.019
313	22	A_30_P01024854	A_55_P2003048	0.761905	0.0131
314	23	A_30_P01024854	A_55_P2032553	-0.928571	0.0007
315	24	A_30_P01024854	A_55_P2038643	0.714286	0.0214
316	25	A_30_P01024854	A_55_P2042096	-0.904762	0.0009
317	26	A_30_P01024854	A_55_P2057726	0.880952	0.0025
318	27	A_30_P01024854	A_55_P2061025	-0.809524	0.0081
319	28	A_30_P01024854	A_55_P2086323	0.761905	0.0141
320	29	A_30_P01024854	A_55_P2116689	0.833333	0.0055
321	30	A_30_P01024854	A_55_P2131452	-0.761905	0.0172
322	31	A_30_P01024854	A_55_P2141686	-0.833333	0.0049
323	32	A_30_P01024854	A_55_P2165210	-0.785714	0.0118
324	33	A_30_P01024854	A_55_P2305623	-0.857143	0.0044
325	34	A_30_P01024854	A_66_P116657	-0.809524	0.0077
326	1	A_30_P01025428	A_52_P311148	-0.833333	0.0054
327	2	A_30_P01025428	A_52_P326664	0.761905	0.0154
328	3	A_30_P01025428	A_55_P1953003	-0.809524	0.0071
329	4	A_30_P01025428	A_55_P1993168	0.809524	0.0076
330	5	A_30_P01025428	A_55_P2052939	-0.738095	0.016
331	6	A_30_P01025428	A_55_P2054027	-0.738095	0.0197
332	7	A_30_P01025428	A_55_P2091274	0.880952	0.0028
333	8	A_30_P01025428	A_55_P2119683	0.761905	0.0121
334	9	A_30_P01025428	A_55_P2136880	-0.785714	0.0094
335	10	A_30_P01025428	A_55_P2393543	0.857143	0.0034
336	11	A_30_P01025428	A_51_P213476	0.928571	0.0005
337	12	A_30_P01025428	A_51_P336599	-0.738095	0.0168
338	13	A_30_P01025428	A_51_P398089	-0.738095	0.0195
339	14	A_30_P01025428	A_51_P435629	-0.738095	0.0175
340	15	A_30_P01025428	A_51_P447189	0.809524	0.0079
341	16	A_30_P01025428	A_52_P1124229	-0.738095	0.0198
342	17	A_30_P01025428	A_52_P425839	-0.714286	0.0228
343	18	A_30_P01025428	A_52_P591310	-0.738095	0.0185
344	19	A_30_P01025428	A_52_P618009	0.738095	0.0205
345	20	A_30_P01025428	A_52_P62444	0.904762	0.0012
346	21	A_30_P01025428	A_52_P820196	0.738095	0.018
347	22	A_30_P01025428	A_55_P1952379	-0.738095	0.0191
348	23	A_30_P01025428	A_55_P1962364	-0.857143	0.0035
349	24	A_30_P01025428	A_55_P1985925	0.833333	0.006
350	25	A_30_P01025428	A_55_P1987151	0.714286	0.0228
351	26	A_30_P01025428	A_55_P1987970	-0.761905	0.0137
352	27	A_30_P01025428	A_55_P1990200	-0.785714	0.01
353	28	A_30_P01025428	A_55_P2018407	0.785714	0.0107
354	29	A_30_P01025428	A_55_P2040485	-0.761905	0.0148
355	30	A_30_P01025428	A_55_P2043277	-0.714286	0.0236
356	31	A_30_P01025428	A_55_P2048134	-0.833333	0.0055
357	32	A_30_P01025428	A_55_P2058275	-0.833333	0.0052
358	33	A_30_P01025428	A_55_P2059701	-0.738095	0.0185
359	34	A_30_P01025428	A_55_P2071472	0.761905	0.0141
360	35	A_30_P01025428	A_55_P2079669	-0.690476	0.0248
361	36	A_30_P01025428	A_55_P2095663	0.785714	0.0102
362	37	A_30_P01025428	A_55_P2103452	-0.738095	0.0177
363	38	A_30_P01025428	A_55_P2143499	-0.738095	0.0181
364	39	A_30_P01025428	A_55_P2195187	-0.761905	0.0149
365	40	A_30_P01025428	A_55_P2269819	-0.857143	0.0032
366	41	A_30_P01025428	A_55_P2273929	0.785714	0.0098
367	42	A_30_P01025428	A_55_P2311591	-0.738095	0.0187
368	43	A_30_P01025428	A_55_P2330069	0.809524	0.0076
369	44	A_30_P01025428	A_55_P2341667	0.809524	0.0071
370	45	A_30_P01025428	A_55_P2346659	-0.785714	0.0107
371	46	A_30_P01025428	A_55_P2380900	0.714286	0.0235
372	47	A_30_P01025428	A_55_P2423518	0.738095	0.0193
373	48	A_30_P01025428	A_55_P2430367	0.738095	0.0173
374	49	A_30_P01025428	A_66_P134297	0.833333	0.005
375	50	A_30_P01025428	A_66_P138976	0.833333	0.0064
376	51	A_30_P01025428	A_66_P139159	-0.857143	0.0039
377	1	A_30_P01027671	A_52_P326664	0.833333	0.0053
378	2	A_30_P01027671	A_55_P1962551	0.833333	0.0066
379	3	A_30_P01027671	A_55_P1993168	0.738095	0.0168
380	4	A_30_P01027671	A_55_P2029289	0.952381	0.0002
381	5	A_30_P01027671	A_55_P2037081	0.738095	0.0199
382	6	A_30_P01027671	A_55_P2042813	0.714286	0.0249
383	7	A_30_P01027671	A_55_P2111790	-0.714286	0.0223
384	8	A_30_P01027671	A_55_P2119683	0.761905	0.0139
385	9	A_30_P01027671	A_55_P2393543	0.857143	0.0035
386	10	A_30_P01027671	A_51_P173678	-0.761905	0.0152
387	11	A_30_P01027671	A_51_P201308	-0.857143	0.0032
388	12	A_30_P01027671	A_51_P372743	-0.785714	0.0108
389	13	A_30_P01027671	A_51_P398089	-0.904762	0.0009
390	14	A_30_P01027671	A_51_P410205	-0.809524	0.0068
391	15	A_30_P01027671	A_51_P447189	0.714286	0.0217
392	16	A_30_P01027671	A_52_P258557	-0.857143	0.0042
393	17	A_30_P01027671	A_52_P313185	0.714286	0.0209
394	18	A_30_P01027671	A_52_P425839	-0.785714	0.0105
395	19	A_30_P01027671	A_52_P482897	0.928571	0.0004
396	20	A_30_P01027671	A_55_P1962364	-0.738095	0.016
397	21	A_30_P01027671	A_55_P1968340	0.738095	0.0179
398	22	A_30_P01027671	A_55_P1990200	-0.785714	0.0109
399	23	A_30_P01027671	A_55_P1993876	-0.714286	0.0225
400	24	A_30_P01027671	A_55_P1999756	-0.833333	0.0062
401	25	A_30_P01027671	A_55_P2014511	0.904762	0.001
402	26	A_30_P01027671	A_55_P2015074	-0.857143	0.0033
403	27	A_30_P01027671	A_55_P2040485	-0.761905	0.0123
404	28	A_30_P01027671	A_55_P2042606	-0.809524	0.0096
405	29	A_30_P01027671	A_55_P2043277	-0.904762	0.0008
406	30	A_30_P01027671	A_55_P2059701	-0.738095	0.0156
407	31	A_30_P01027671	A_55_P2079922	-0.714286	0.0214
408	32	A_30_P01027671	A_55_P2091297	-0.761905	0.0146
409	33	A_30_P01027671	A_55_P2103452	-0.833333	0.0065
410	34	A_30_P01027671	A_55_P2105416	-0.809524	0.0084
411	35	A_30_P01027671	A_55_P2130249	-0.761905	0.0151
412	36	A_30_P01027671	A_55_P2131481	0.857143	0.004
413	37	A_30_P01027671	A_55_P2133007	0.761905	0.0153
414	38	A_30_P01027671	A_55_P2143499	-0.714286	0.0232
415	39	A_30_P01027671	A_55_P2148931	-0.809524	0.0081
416	40	A_30_P01027671	A_55_P2157517	-0.857143	0.0034
417	41	A_30_P01027671	A_55_P2176953	-0.928571	0.0006
418	42	A_30_P01027671	A_55_P2195187	-0.761905	0.0129
419	43	A_30_P01027671	A_55_P2266285	0.761905	0.0156
420	44	A_30_P01027671	A_55_P2269819	-0.714286	0.0235
421	45	A_30_P01027671	A_55_P2311591	-0.928571	0.0003
422	46	A_30_P01027671	A_55_P2330069	0.738095	0.0178
423	47	A_30_P01027671	A_55_P2341667	0.714286	0.0244
424	48	A_30_P01027671	A_55_P2361932	-0.785714	0.0098
425	49	A_30_P01027671	A_55_P2423518	0.714286	0.0221
426	50	A_30_P01027671	A_66_P138976	0.761905	0.013
427	1	A_30_P01028538	A_51_P239654	0.904762	0.0011
428	2	A_30_P01028538	A_52_P128134	0.904762	0.0012
429	3	A_30_P01028538	A_52_P31543	0.928571	0.0008
430	4	A_30_P01028538	A_55_P1988043	-0.833333	0.0046
431	5	A_30_P01028538	A_55_P2021505	0.809524	0.0079
432	6	A_30_P01028538	A_55_P2027152	-0.761905	0.0143
433	7	A_30_P01028538	A_55_P2095727	0.738095	0.0154
434	8	A_30_P01028538	A_55_P2111790	0.785714	0.0093
435	9	A_30_P01028538	A_55_P2113051	0.857143	0.003
436	10	A_30_P01028538	A_55_P2169227	0.738095	0.021
437	11	A_30_P01028538	A_66_P122621	0.880952	0.0011
438	12	A_30_P01028538	A_51_P173678	0.761905	0.014
439	13	A_30_P01028538	A_51_P205524	-0.738095	0.0208
440	14	A_30_P01028538	A_51_P225484	0.880952	0.0021
441	15	A_30_P01028538	A_52_P8459	0.714286	0.0224
442	16	A_30_P01028538	A_55_P1976972	0.857143	0.0042
443	17	A_30_P01028538	A_55_P1993876	0.809524	0.0086
444	18	A_30_P01028538	A_55_P1998641	-0.738095	0.0208
445	19	A_30_P01028538	A_55_P2003048	0.785714	0.0111
446	20	A_30_P01028538	A_55_P2011877	-0.785714	0.0123
447	21	A_30_P01028538	A_55_P2015074	0.714286	0.0221
448	22	A_30_P01028538	A_55_P2032553	-0.785714	0.012
449	23	A_30_P01028538	A_55_P2042096	-0.761905	0.013
450	24	A_30_P01028538	A_55_P2127482	0.738095	0.0164
451	25	A_30_P01028538	A_55_P2165210	-0.714286	0.0224
452	26	A_30_P01028538	A_55_P2305623	-0.738095	0.0213
453	27	A_30_P01028538	A_55_P2305900	0.761905	0.0137
454	28	A_30_P01028538	A_55_P2423518	-0.738095	0.0184
455	1	A_30_P01029142	A_51_P328631	0.714286	0.0227
456	2	A_30_P01029142	A_55_P2055344	-0.761905	0.0154
457	3	A_30_P01029142	A_55_P2130249	-0.714286	0.0239
458	4	A_30_P01029142	A_55_P2160168	0.738095	0.0173
459	5	A_30_P01029142	A_55_P2346659	-0.714286	0.0246
460	1	A_30_P01029484	A_55_P2045871	0.738095	0.0193
461	2	A_30_P01029484	A_51_P131216	-0.761905	0.0133
462	3	A_30_P01029484	A_51_P438781	-0.761905	0.0113
463	4	A_30_P01029484	A_52_P349694	-0.714286	0.0217
464	5	A_30_P01029484	A_52_P598835	-0.738095	0.0192
465	6	A_30_P01029484	A_55_P1957294	-0.761905	0.0144
466	7	A_30_P01029484	A_55_P1997135	-0.714286	0.0233
467	8	A_30_P01029484	A_55_P2106039	-0.809524	0.0074
468	9	A_30_P01029484	A_55_P2166238	-0.833333	0.0038
469	10	A_30_P01029484	A_55_P2179925	-0.880952	0.002
470	11	A_30_P01029484	A_55_P2284273	-0.714286	0.0227
471	12	A_30_P01029484	A_55_P2295691	-0.857143	0.0037
472	13	A_30_P01029484	A_55_P2339399	-0.785714	0.0115
473	14	A_30_P01029484	A_66_P124254	-0.785714	0.0107
474	1	A_30_P01030791	A_51_P153683	0.833333	0.0053
475	2	A_30_P01030791	A_51_P288341	0.738095	0.0184
476	3	A_30_P01030791	A_51_P428483	0.738095	0.0177
477	4	A_30_P01030791	A_52_P311148	-0.857143	0.0027
478	5	A_30_P01030791	A_52_P326664	0.97619	0
479	6	A_30_P01030791	A_55_P1993168	0.928571	0.0006
480	7	A_30_P01030791	A_55_P2029289	0.714286	0.0194
481	8	A_30_P01030791	A_55_P2037081	0.857143	0.0057
482	9	A_30_P01030791	A_55_P2119683	0.97619	0.0001
483	10	A_30_P01030791	A_51_P201308	-0.857143	0.0039
484	11	A_30_P01030791	A_51_P213476	0.761905	0.0138
485	12	A_30_P01030791	A_51_P336599	-0.761905	0.0133
486	13	A_30_P01030791	A_51_P349888	-0.809524	0.0072
487	14	A_30_P01030791	A_51_P376445	-0.785714	0.0098
488	15	A_30_P01030791	A_51_P398089	-0.857143	0.0029
489	16	A_30_P01030791	A_51_P435629	-0.761905	0.0155
490	17	A_30_P01030791	A_51_P447189	0.880952	0.0013
491	18	A_30_P01030791	A_52_P258557	-0.714286	0.0221
492	19	A_30_P01030791	A_52_P425839	-0.952381	0.0002
493	20	A_30_P01030791	A_52_P482897	0.738095	0.0177
494	21	A_30_P01030791	A_52_P591310	-0.761905	0.0145
495	22	A_30_P01030791	A_52_P61520	-0.714286	0.0206
496	23	A_30_P01030791	A_52_P62444	0.785714	0.0113
497	24	A_30_P01030791	A_55_P1952284	-0.714286	0.0238
498	25	A_30_P01030791	A_55_P1952379	-0.738095	0.0179
499	26	A_30_P01030791	A_55_P1960441	0.714286	0.0239
500	27	A_30_P01030791	A_55_P1962364	-0.809524	0.0084
501	28	A_30_P01030791	A_55_P1963011	-0.833333	0.0045
502	29	A_30_P01030791	A_55_P1968340	0.928571	0.0005
503	30	A_30_P01030791	A_55_P1977299	-0.785714	0.0108
504	31	A_30_P01030791	A_55_P2014511	0.761905	0.0139
505	32	A_30_P01030791	A_55_P2015074	-0.785714	0.0099
506	33	A_30_P01030791	A_55_P2018407	0.904762	0.0011
507	34	A_30_P01030791	A_55_P2025538	-0.880952	0.0024
508	35	A_30_P01030791	A_55_P2030465	-0.714286	0.0212
509	36	A_30_P01030791	A_55_P2040485	-0.97619	0
510	37	A_30_P01030791	A_55_P2042606	-0.714286	0.0215
511	38	A_30_P01030791	A_55_P2043277	-0.880952	0.0026
512	39	A_30_P01030791	A_55_P2054703	0.738095	0.0164
513	40	A_30_P01030791	A_55_P2058275	-0.785714	0.0101
514	41	A_30_P01030791	A_55_P2059701	-0.880952	0.0017
515	42	A_30_P01030791	A_55_P2064702	-0.738095	0.0173
516	43	A_30_P01030791	A_55_P2079922	-0.785714	0.0098
517	44	A_30_P01030791	A_55_P2084691	-0.809524	0.0052
518	45	A_30_P01030791	A_55_P2091297	-0.714286	0.0248
519	46	A_30_P01030791	A_55_P2095663	0.785714	0.0105
520	47	A_30_P01030791	A_55_P2103452	-0.809524	0.0086
521	48	A_30_P01030791	A_55_P2133007	0.809524	0.0067
522	49	A_30_P01030791	A_55_P2139216	-0.714286	0.0249
523	50	A_30_P01030791	A_55_P2143499	-0.880952	0.0021
524	51	A_30_P01030791	A_55_P2148931	-0.785714	0.0112
525	52	A_30_P01030791	A_55_P2176953	-0.904762	0.0007
526	53	A_30_P01030791	A_55_P2183508	-0.738095	0.0181
527	54	A_30_P01030791	A_55_P2195187	-0.714286	0.0225
528	55	A_30_P01030791	A_55_P2269819	-0.738095	0.0168
529	56	A_30_P01030791	A_55_P2284273	0.738095	0.0184
530	57	A_30_P01030791	A_55_P2311591	-0.738095	0.0178
531	58	A_30_P01030791	A_55_P2330069	0.880952	0.0016
532	59	A_30_P01030791	A_55_P2341667	0.880952	0.0022
533	60	A_30_P01030791	A_55_P2350710	-0.761905	0.0146
534	61	A_30_P01030791	A_55_P2361932	-0.738095	0.0164
535	62	A_30_P01030791	A_55_P2371879	-0.714286	0.0219
536	63	A_30_P01030791	A_55_P2416494	0.738095	0.0182
537	64	A_30_P01030791	A_66_P138976	0.857143	0.0038
538	65	A_30_P01030791	A_66_P139646	0.833333	0.0045
539	1	A_30_P01031072	A_51_P239654	0.904762	0.0012
540	2	A_30_P01031072	A_52_P128134	0.904762	0.0014
541	3	A_30_P01031072	A_52_P31543	0.928571	0.0007
542	4	A_30_P01031072	A_55_P1988043	-0.833333	0.0063
543	5	A_30_P01031072	A_55_P2021505	0.809524	0.0076
544	6	A_30_P01031072	A_55_P2027152	-0.761905	0.0133
545	7	A_30_P01031072	A_55_P2095727	0.738095	0.0175
546	8	A_30_P01031072	A_55_P2111790	0.785714	0.0104
547	9	A_30_P01031072	A_55_P2113051	0.857143	0.0033
548	10	A_30_P01031072	A_55_P2169227	0.738095	0.019
549	11	A_30_P01031072	A_66_P122621	0.880952	0.0032
550	12	A_30_P01031072	A_51_P173678	0.761905	0.0142
551	13	A_30_P01031072	A_51_P205524	-0.738095	0.0162
552	14	A_30_P01031072	A_51_P225484	0.880952	0.0021
553	15	A_30_P01031072	A_52_P8459	0.714286	0.0179
554	16	A_30_P01031072	A_55_P1976972	0.857143	0.0041
555	17	A_30_P01031072	A_55_P1993876	0.809524	0.0077
556	18	A_30_P01031072	A_55_P1998641	-0.738095	0.017
557	19	A_30_P01031072	A_55_P2003048	0.785714	0.011
558	20	A_30_P01031072	A_55_P2011877	-0.785714	0.0115
559	21	A_30_P01031072	A_55_P2032553	-0.785714	0.0123
560	22	A_30_P01031072	A_55_P2042096	-0.761905	0.0137
561	23	A_30_P01031072	A_55_P2127482	0.738095	0.018
562	24	A_30_P01031072	A_55_P2165210	-0.714286	0.021
563	25	A_30_P01031072	A_55_P2305623	-0.738095	0.0191
564	26	A_30_P01031072	A_55_P2305900	0.761905	0.0124
565	27	A_30_P01031072	A_55_P2423518	-0.738095	0.018
566	1	A_30_P01033638	A_55_P2029289	-0.738095	0.0172
567	2	A_30_P01033638	A_66_P122621	0.833333	0.0038
568	3	A_30_P01033638	A_51_P225484	0.761905	0.0142
569	4	A_30_P01033638	A_51_P372743	0.738095	0.0169
570	5	A_30_P01033638	A_52_P258557	0.714286	0.0234
571	6	A_30_P01033638	A_52_P62833	0.714286	0.023
572	7	A_30_P01033638	A_55_P1984881	0.738095	0.0156
573	8	A_30_P01033638	A_55_P1993876	0.738095	0.0189
574	9	A_30_P01033638	A_55_P2003048	0.714286	0.0214
575	10	A_30_P01033638	A_55_P2032553	-0.785714	0.0109
576	11	A_30_P01033638	A_55_P2057912	-0.857143	0.0029
577	12	A_30_P01033638	A_55_P2086323	0.809524	0.0087
578	13	A_30_P01033638	A_55_P2105416	0.714286	0.0195
579	14	A_30_P01033638	A_55_P2116689	0.738095	0.02
580	15	A_30_P01033638	A_55_P2130249	0.880952	0.0022
581	16	A_30_P01033638	A_55_P2131481	-0.809524	0.0089
582	17	A_30_P01033638	A_55_P2141686	-0.761905	0.0148
583	18	A_30_P01033638	A_55_P2266285	-0.809524	0.006
584	19	A_30_P01033638	A_55_P2305900	0.761905	0.014
585	20	A_30_P01033638	A_55_P2311591	0.714286	0.0236
586	21	A_30_P01033638	A_66_P116657	-0.738095	0.0155
587	1	A_30_P01017540	A_51_P198675	-0.761905	0.0129
588	2	A_30_P01017540	A_51_P288341	-0.714286	0.0246
589	3	A_30_P01017540	A_55_P1977431	-0.809524	0.006
590	4	A_30_P01017540	A_55_P1998086	-0.904762	0.0012
591	5	A_30_P01017540	A_55_P2091274	-0.857143	0.0035
592	6	A_30_P01017540	A_55_P2153461	-0.738095	0.0164
593	7	A_30_P01017540	A_51_P113195	0.904762	0.0009
594	8	A_30_P01017540	A_51_P114817	0.833333	0.0061
595	9	A_30_P01017540	A_51_P149267	0.761905	0.0172
596	10	A_30_P01017540	A_51_P336599	0.761905	0.0165
597	11	A_30_P01017540	A_51_P349888	0.714286	0.0244
598	12	A_30_P01017540	A_51_P435629	0.761905	0.0141
599	13	A_30_P01017540	A_51_P435844	0.809524	0.0074
600	14	A_30_P01017540	A_51_P475816	0.880952	0.0025
601	15	A_30_P01017540	A_51_P497768	0.833333	0.0052
602	16	A_30_P01017540	A_52_P1124229	0.857143	0.0027
603	17	A_30_P01017540	A_52_P125485	0.761905	0.0139
604	18	A_30_P01017540	A_52_P591310	0.738095	0.0151
605	19	A_30_P01017540	A_52_P61520	0.809524	0.008
606	20	A_30_P01017540	A_52_P649817	0.880952	0.0019
607	21	A_30_P01017540	A_55_P1952284	0.785714	0.0106
608	22	A_30_P01017540	A_55_P1952379	0.738095	0.0177
609	23	A_30_P01017540	A_55_P1953107	0.785714	0.0107
610	24	A_30_P01017540	A_55_P1965248	0.833333	0.0049
611	25	A_30_P01017540	A_55_P1966070	0.714286	0.0206
612	26	A_30_P01017540	A_55_P1968099	0.904762	0.0008
613	27	A_30_P01017540	A_55_P1970279	0.952381	0
614	28	A_30_P01017540	A_55_P1973588	0.833333	0.0065
615	29	A_30_P01017540	A_55_P1976589	0.952381	0.0001
616	30	A_30_P01017540	A_55_P1986169	0.761905	0.0156
617	31	A_30_P01017540	A_55_P1986571	0.904762	0.0009
618	32	A_30_P01017540	A_55_P1987554	0.738095	0.0178
619	33	A_30_P01017540	A_55_P1987970	0.738095	0.018
620	34	A_30_P01017540	A_55_P2002787	0.761905	0.0136
621	35	A_30_P01017540	A_55_P2009483	0.714286	0.0224
622	36	A_30_P01017540	A_55_P2017955	0.857143	0.003
623	37	A_30_P01017540	A_55_P2040594	0.714286	0.024
624	38	A_30_P01017540	A_55_P2048134	0.928571	0.001
625	39	A_30_P01017540	A_55_P2052655	0.738095	0.0169
626	40	A_30_P01017540	A_55_P2058761	0.952381	0.0001
627	41	A_30_P01017540	A_55_P2065815	0.857143	0.0033
628	42	A_30_P01017540	A_55_P2067321	0.833333	0.0051
629	43	A_30_P01017540	A_55_P2071112	0.785714	0.0114
630	44	A_30_P01017540	A_55_P2073930	0.880952	0.0017
631	45	A_30_P01017540	A_55_P2076215	0.97619	0
632	46	A_30_P01017540	A_55_P2076219	0.738095	0.02
633	47	A_30_P01017540	A_55_P2079475	0.809524	0.0084
634	48	A_30_P01017540	A_55_P2079669	0.761905	0.0129
635	49	A_30_P01017540	A_55_P2080587	0.714286	0.0236
636	50	A_30_P01017540	A_55_P2085651	0.738095	0.0202
637	51	A_30_P01017540	A_55_P2091297	0.738095	0.0164
638	52	A_30_P01017540	A_55_P2096455	0.809524	0.0077
639	53	A_30_P01017540	A_55_P2103452	0.714286	0.0237
640	54	A_30_P01017540	A_55_P2105296	0.928571	0.0005
641	55	A_30_P01017540	A_55_P2109312	0.738095	0.0183
642	56	A_30_P01017540	A_55_P2113758	0.738095	0.0187
643	57	A_30_P01017540	A_55_P2114059	0.809524	0.0098
644	58	A_30_P01017540	A_55_P2128144	0.880952	0.0017
645	59	A_30_P01017540	A_55_P2128582	0.928571	0.0014
646	60	A_30_P01017540	A_55_P2135178	0.880952	0.003
647	61	A_30_P01017540	A_55_P2135895	0.833333	0.005
648	62	A_30_P01017540	A_55_P2139216	0.738095	0.0202
649	63	A_30_P01017540	A_55_P2155116	0.904762	0.0015
650	64	A_30_P01017540	A_55_P2155859	0.809524	0.0091
651	65	A_30_P01017540	A_55_P2159315	0.714286	0.0246
652	66	A_30_P01017540	A_55_P2163383	0.738095	0.0168
653	67	A_30_P01017540	A_55_P2238933	0.785714	0.0086
654	68	A_30_P01017540	A_55_P2244360	0.833333	0.0045
655	69	A_30_P01017540	A_55_P2269819	0.714286	0.0239
656	70	A_30_P01017540	A_55_P2330435	0.809524	0.0076
657	71	A_30_P01017540	A_55_P2361932	0.761905	0.0149
658	72	A_30_P01017540	A_55_P2362970	0.714286	0.0208
659	73	A_30_P01017540	A_66_P101132	0.904762	0.0017
660	74	A_30_P01017540	A_66_P130067	0.714286	0.021
661	75	A_30_P01017540	A_66_P135124	0.738095	0.0178
662	76	A_30_P01017540	A_66_P139159	0.714286	0.0224
663	77	A_30_P01017540	A_66_P139883	0.880952	0.0021
664	1	A_30_P01017656	A_51_P198675	-0.714286	0.0224
665	2	A_30_P01017656	A_55_P1977431	-0.833333	0.0051
666	3	A_30_P01017656	A_55_P1998086	-0.714286	0.0223
667	4	A_30_P01017656	A_55_P2091274	-0.738095	0.0188
668	5	A_30_P01017656	A_55_P2153461	-0.738095	0.0189
669	6	A_30_P01017656	A_55_P2153740	-0.714286	0.0239
670	7	A_30_P01017656	A_55_P2162825	-0.761905	0.014
671	8	A_30_P01017656	A_51_P113195	1	0
672	9	A_30_P01017656	A_51_P149267	0.761905	0.0147
673	10	A_30_P01017656	A_51_P435844	0.785714	0.0104
674	11	A_30_P01017656	A_51_P475816	0.761905	0.0132
675	12	A_30_P01017656	A_51_P497768	0.738095	0.0192
676	13	A_30_P01017656	A_52_P1124229	0.809524	0.0078
677	14	A_30_P01017656	A_52_P322474	0.714286	0.0232
678	15	A_30_P01017656	A_52_P576188	0.761905	0.0148
679	16	A_30_P01017656	A_52_P649817	0.738095	0.0188
680	17	A_30_P01017656	A_52_P94021	0.785714	0.0106
681	18	A_30_P01017656	A_55_P1953107	0.761905	0.0134
682	19	A_30_P01017656	A_55_P1965248	0.928571	0.0003
683	20	A_30_P01017656	A_55_P1968099	0.714286	0.0209
684	21	A_30_P01017656	A_55_P1970279	0.904762	0.0007
685	22	A_30_P01017656	A_55_P1973588	0.738095	0.0176
686	23	A_30_P01017656	A_55_P1976589	0.97619	0.0001
687	24	A_30_P01017656	A_55_P1986571	0.952381	0.0002
688	25	A_30_P01017656	A_55_P1987554	0.714286	0.0228
689	26	A_30_P01017656	A_55_P1990341	0.833333	0.0056
690	27	A_30_P01017656	A_55_P2001033	0.761905	0.0135
691	28	A_30_P01017656	A_55_P2002787	0.761905	0.0134
692	29	A_30_P01017656	A_55_P2034091	0.761905	0.0133
693	30	A_30_P01017656	A_55_P2048134	0.833333	0.0049
694	31	A_30_P01017656	A_55_P2058761	0.904762	0.0013
695	32	A_30_P01017656	A_55_P2071112	0.857143	0.0033
696	33	A_30_P01017656	A_55_P2073930	0.97619	0
697	34	A_30_P01017656	A_55_P2076215	0.952381	0
698	35	A_30_P01017656	A_55_P2079475	0.833333	0.0051
699	36	A_30_P01017656	A_55_P2079669	0.714286	0.0206
700	37	A_30_P01017656	A_55_P2105296	0.761905	0.0131
701	38	A_30_P01017656	A_55_P2128144	0.809524	0.008
702	39	A_30_P01017656	A_55_P2128582	0.857143	0.0037
703	40	A_30_P01017656	A_55_P2135178	0.880952	0.0024
704	41	A_30_P01017656	A_55_P2135895	0.785714	0.0105
705	42	A_30_P01017656	A_55_P2155116	0.857143	0.0035
706	43	A_30_P01017656	A_55_P2155859	0.833333	0.0062
707	44	A_30_P01017656	A_55_P2244360	0.809524	0.0076
708	45	A_30_P01017656	A_55_P2330215	0.714286	0.0215
709	46	A_30_P01017656	A_66_P101132	0.928571	0.0006
710	47	A_30_P01017656	A_66_P123538	0.809524	0.0076
711	48	A_30_P01017656	A_66_P139159	0.761905	0.0153
712	49	A_30_P01017656	A_66_P139883	0.809524	0.0072
713	1	A_30_P01017677	A_52_P213207	-0.833333	0.0068
714	2	A_30_P01017677	A_55_P2029289	0.714286	0.0229
715	3	A_30_P01017677	A_51_P372743	-0.809524	0.0081
716	4	A_30_P01017677	A_52_P258557	-0.738095	0.0191
717	5	A_30_P01017677	A_52_P482897	0.761905	0.012
718	6	A_30_P01017677	A_55_P1960441	0.857143	0.0041
719	7	A_30_P01017677	A_55_P1961883	0.97619	0
720	8	A_30_P01017677	A_55_P1968340	0.714286	0.0234
721	9	A_30_P01017677	A_55_P2014511	0.738095	0.0171
722	10	A_30_P01017677	A_55_P2086323	-0.809524	0.0071
723	11	A_30_P01017677	A_55_P2105416	-0.714286	0.0236
724	12	A_30_P01017677	A_55_P2131481	0.761905	0.0139
725	13	A_30_P01017677	A_55_P2266285	0.928571	0.0006
726	14	A_30_P01017677	A_55_P2284273	0.809524	0.01
727	15	A_30_P01017677	A_55_P2407192	-0.761905	0.0118
728	1	A_30_P01017838	A_51_P176583	-0.738095	0.0191
729	2	A_30_P01017838	A_51_P198675	-0.928571	0.0005
730	3	A_30_P01017838	A_51_P288341	-0.880952	0.0019
731	4	A_30_P01017838	A_51_P428483	-0.761905	0.0127
732	5	A_30_P01017838	A_52_P460836	-0.809524	0.0081
733	6	A_30_P01017838	A_55_P1977431	-0.785714	0.0104
734	7	A_30_P01017838	A_55_P1998086	-0.857143	0.0041
735	8	A_30_P01017838	A_55_P2091274	-0.714286	0.0191
736	9	A_30_P01017838	A_55_P2131328	-0.714286	0.0222
737	10	A_30_P01017838	A_55_P2153461	-0.785714	0.0111
738	11	A_30_P01017838	A_51_P113195	0.809524	0.0085
739	12	A_30_P01017838	A_51_P114817	0.904762	0.0011
740	13	A_30_P01017838	A_51_P149267	0.785714	0.0119
741	14	A_30_P01017838	A_51_P189082	0.880952	0.0021
742	15	A_30_P01017838	A_51_P193813	0.785714	0.0089
743	16	A_30_P01017838	A_51_P336599	0.880952	0.0033
744	17	A_30_P01017838	A_51_P349888	0.785714	0.0111
745	18	A_30_P01017838	A_51_P376445	0.809524	0.0081
746	19	A_30_P01017838	A_51_P379552	0.714286	0.0247
747	20	A_30_P01017838	A_51_P435629	0.880952	0.0014
748	21	A_30_P01017838	A_51_P475816	0.880952	0.002
749	22	A_30_P01017838	A_51_P497768	0.857143	0.0043
750	23	A_30_P01017838	A_52_P1044655	0.785714	0.01
751	24	A_30_P01017838	A_52_P1124229	0.880952	0.002
752	25	A_30_P01017838	A_52_P125485	0.761905	0.0135
753	26	A_30_P01017838	A_52_P591310	0.761905	0.0137
754	27	A_30_P01017838	A_52_P61520	0.880952	0.0027
755	28	A_30_P01017838	A_55_P1952284	0.714286	0.0224
756	29	A_30_P01017838	A_55_P1953107	0.809524	0.0072
757	30	A_30_P01017838	A_55_P1962364	0.738095	0.0175
758	31	A_30_P01017838	A_55_P1963011	0.809524	0.0073
759	32	A_30_P01017838	A_55_P1964252	0.738095	0.0182
760	33	A_30_P01017838	A_55_P1968099	0.833333	0.0042
761	34	A_30_P01017838	A_55_P1970279	0.857143	0.0031
762	35	A_30_P01017838	A_55_P1976589	0.857143	0.0035
763	36	A_30_P01017838	A_55_P1981030	0.738095	0.0186
764	37	A_30_P01017838	A_55_P1986571	0.785714	0.0114
765	38	A_30_P01017838	A_55_P1987970	0.880952	0.0027
766	39	A_30_P01017838	A_55_P1998641	0.738095	0.0169
767	40	A_30_P01017838	A_55_P2002787	0.785714	0.0104
768	41	A_30_P01017838	A_55_P2009483	0.714286	0.0236
769	42	A_30_P01017838	A_55_P2009767	0.761905	0.0133
770	43	A_30_P01017838	A_55_P2011096	0.714286	0.0245
771	44	A_30_P01017838	A_55_P2012702	0.833333	0.0058
772	45	A_30_P01017838	A_55_P2017955	0.833333	0.0052
773	46	A_30_P01017838	A_55_P2023021	0.785714	0.0113
774	47	A_30_P01017838	A_55_P2030465	0.761905	0.0121
775	48	A_30_P01017838	A_55_P2030612	0.785714	0.0112
776	49	A_30_P01017838	A_55_P2048134	0.785714	0.0113
777	50	A_30_P01017838	A_55_P2058761	0.857143	0.004
778	51	A_30_P01017838	A_55_P2059701	0.738095	0.0186
779	52	A_30_P01017838	A_55_P2061025	0.714286	0.0229
780	53	A_30_P01017838	A_55_P2064702	0.809524	0.0065
781	54	A_30_P01017838	A_55_P2065815	0.952381	0.0001
782	55	A_30_P01017838	A_55_P2067321	0.904762	0.0015
783	56	A_30_P01017838	A_55_P2073930	0.738095	0.0177
784	57	A_30_P01017838	A_55_P2076215	0.904762	0.0007
785	58	A_30_P01017838	A_55_P2076219	0.738095	0.0196
786	59	A_30_P01017838	A_55_P2079475	0.714286	0.0206
787	60	A_30_P01017838	A_55_P2079669	0.928571	0.001
788	61	A_30_P01017838	A_55_P2091297	0.738095	0.0181
789	62	A_30_P01017838	A_55_P2094108	0.833333	0.005
790	63	A_30_P01017838	A_55_P2096455	0.785714	0.0107
791	64	A_30_P01017838	A_55_P2103452	0.738095	0.0187
792	65	A_30_P01017838	A_55_P2105296	0.809524	0.0087
793	66	A_30_P01017838	A_55_P2109312	0.714286	0.0195
794	67	A_30_P01017838	A_55_P2114059	0.785714	0.0114
795	68	A_30_P01017838	A_55_P2124923	0.738095	0.0163
796	69	A_30_P01017838	A_55_P2126002	0.833333	0.0069
797	70	A_30_P01017838	A_55_P2128144	0.714286	0.0235
798	71	A_30_P01017838	A_55_P2128582	0.904762	0.0014
799	72	A_30_P01017838	A_55_P2131452	0.738095	0.02
800	73	A_30_P01017838	A_55_P2135178	0.761905	0.0137
801	74	A_30_P01017838	A_55_P2135895	0.97619	0
802	75	A_30_P01017838	A_55_P2139216	0.857143	0.003
803	76	A_30_P01017838	A_55_P2143499	0.809524	0.0083
804	77	A_30_P01017838	A_55_P2155116	0.833333	0.0053
805	78	A_30_P01017838	A_55_P2163383	0.904762	0.0012
806	79	A_30_P01017838	A_55_P2165210	0.809524	0.0069
807	80	A_30_P01017838	A_55_P2305623	0.738095	0.0184
808	81	A_30_P01017838	A_55_P2330435	0.785714	0.0131
809	82	A_30_P01017838	A_55_P2350710	0.833333	0.0066
810	83	A_30_P01017838	A_55_P2361932	0.809524	0.0083
811	84	A_30_P01017838	A_55_P2362970	0.809524	0.0086
812	85	A_30_P01017838	A_55_P2371879	0.785714	0.0092
813	86	A_30_P01017838	A_55_P2427150	0.857143	0.0036
814	87	A_30_P01017838	A_66_P101132	0.880952	0.0028
815	88	A_30_P01017838	A_66_P135124	0.857143	0.0035
816	89	A_30_P01017838	A_66_P139159	0.785714	0.009
817	90	A_30_P01017838	A_66_P139883	0.928571	0.0007
818	1	A_30_P01018096	A_51_P278653	0.738095	0.0183
819	2	A_30_P01018096	A_51_P320022	0.738095	0.0187
820	3	A_30_P01018096	A_55_P1955084	0.761905	0.0172
821	4	A_30_P01018096	A_55_P1957729	0.714286	0.0219
822	5	A_30_P01018096	A_55_P1960896	0.833333	0.004
823	6	A_30_P01018096	A_55_P1979126	0.785714	0.0093
824	7	A_30_P01018096	A_55_P1979888	0.880952	0.002
825	8	A_30_P01018096	A_55_P1981030	0.738095	0.018
826	9	A_30_P01018096	A_55_P1998204	0.857143	0.0029
827	10	A_30_P01018096	A_55_P2041444	0.714286	0.0219
828	11	A_30_P01018096	A_55_P2076782	0.880952	0.0022
829	12	A_30_P01018096	A_55_P2079922	0.714286	0.0223
830	13	A_30_P01018096	A_55_P2113690	0.761905	0.0131
831	14	A_30_P01018096	A_55_P2118614	0.714286	0.0228
832	15	A_30_P01018096	A_55_P2131283	0.738095	0.0187
833	16	A_30_P01018096	A_55_P2168286	0.714286	0.0218
834	17	A_30_P01018096	A_55_P2353079	0.833333	0.0043
835	18	A_30_P01018096	A_55_P2353457	0.738095	0.0202
836	19	A_30_P01018096	A_55_P2366358	0.785714	0.0108
837	20	A_30_P01018096	A_55_P2416837	0.785714	0.0105
838	21	A_30_P01018096	A_65_P08507	0.833333	0.0053
839	1	A_30_P01018099	A_51_P239654	-0.714286	0.0238
840	2	A_30_P01018099	A_52_P128134	-0.714286	0.0218
841	3	A_30_P01018099	A_55_P2029289	0.928571	0.0008
842	4	A_30_P01018099	A_55_P2111790	-0.880952	0.0031
843	5	A_30_P01018099	A_55_P2113051	-0.761905	0.012
844	6	A_30_P01018099	A_55_P2136880	-0.904762	0.0013
845	7	A_30_P01018099	A_55_P2393543	0.904762	0.0007
846	8	A_30_P01018099	A_51_P173678	-0.857143	0.0039
847	9	A_30_P01018099	A_51_P213476	0.738095	0.0199
848	10	A_30_P01018099	A_51_P372743	-0.857143	0.0037
849	11	A_30_P01018099	A_51_P398089	-0.785714	0.0091
850	12	A_30_P01018099	A_51_P447189	0.761905	0.0145
851	13	A_30_P01018099	A_52_P258557	-0.928571	0.001
852	14	A_30_P01018099	A_52_P482897	0.880952	0.0028
853	15	A_30_P01018099	A_52_P62444	0.714286	0.0237
854	16	A_30_P01018099	A_55_P1960441	0.785714	0.0115
855	17	A_30_P01018099	A_55_P1962364	-0.785714	0.0107
856	18	A_30_P01018099	A_55_P1990200	-0.952381	0.0002
857	19	A_30_P01018099	A_55_P1993876	-0.714286	0.0236
858	20	A_30_P01018099	A_55_P2014511	0.857143	0.003
859	21	A_30_P01018099	A_55_P2015074	-0.809524	0.0086
860	22	A_30_P01018099	A_55_P2018407	0.714286	0.0244
861	23	A_30_P01018099	A_55_P2043277	-0.714286	0.0222
862	24	A_30_P01018099	A_55_P2057912	0.904762	0.0013
863	25	A_30_P01018099	A_55_P2086323	-0.761905	0.0135
864	26	A_30_P01018099	A_55_P2130249	-0.904762	0.0006
865	27	A_30_P01018099	A_55_P2131481	0.97619	0
866	28	A_30_P01018099	A_55_P2133007	0.785714	0.013
867	29	A_30_P01018099	A_55_P2160168	0.857143	0.0038
868	30	A_30_P01018099	A_55_P2176953	-0.714286	0.0243
869	31	A_30_P01018099	A_55_P2195187	-0.714286	0.0242
870	32	A_30_P01018099	A_55_P2266285	0.809524	0.0092
871	33	A_30_P01018099	A_55_P2269819	-0.761905	0.0141
872	34	A_30_P01018099	A_55_P2284273	0.738095	0.0188
873	35	A_30_P01018099	A_55_P2311591	-0.904762	0.0012
874	36	A_30_P01018099	A_55_P2330069	0.738095	0.0165
875	37	A_30_P01018099	A_55_P2341667	0.761905	0.0144
876	38	A_30_P01018099	A_55_P2346659	-0.880952	0.0022
877	39	A_30_P01018099	A_55_P2380900	0.714286	0.0208
878	40	A_30_P01018099	A_55_P2423518	0.928571	0.0008
879	41	A_30_P01018099	A_66_P134297	0.833333	0.0063
880	42	A_30_P01018099	A_66_P138976	0.785714	0.0121
881	1	A_30_P01018335	A_51_P239654	-0.809524	0.0077
882	2	A_30_P01018335	A_52_P128134	-0.809524	0.0099
883	3	A_30_P01018335	A_52_P31543	-0.833333	0.0049
884	4	A_30_P01018335	A_55_P2021505	-0.761905	0.0122
885	5	A_30_P01018335	A_55_P2095727	-0.833333	0.0046
886	6	A_30_P01018335	A_55_P2111790	-0.761905	0.0132
887	7	A_30_P01018335	A_55_P2113051	-0.714286	0.0235
888	8	A_30_P01018335	A_55_P2131328	-0.714286	0.0239
889	9	A_30_P01018335	A_51_P173678	-0.738095	0.0179
890	10	A_30_P01018335	A_51_P205524	0.714286	0.0246
891	11	A_30_P01018335	A_52_P63855	0.761905	0.0142
892	12	A_30_P01018335	A_55_P1976972	-0.785714	0.0088
893	13	A_30_P01018335	A_55_P2015074	-0.761905	0.0149
894	14	A_30_P01018335	A_55_P2041444	-0.714286	0.0225
895	15	A_30_P01018335	A_55_P2042096	0.761905	0.0148
896	16	A_30_P01018335	A_55_P2061025	0.714286	0.024
897	17	A_30_P01018335	A_55_P2085989	0.857143	0.0036
898	1	A_30_P01018465	A_51_P153683	-0.857143	0.0035
899	2	A_30_P01018465	A_51_P198675	-0.714286	0.0223
900	3	A_30_P01018465	A_51_P288341	-0.809524	0.0083
901	4	A_30_P01018465	A_52_P876147	-0.738095	0.0184
902	5	A_30_P01018465	A_55_P1977431	-0.904762	0.001
903	6	A_30_P01018465	A_55_P2037081	-0.785714	0.0097
904	7	A_30_P01018465	A_55_P2091274	-0.785714	0.0115
905	8	A_30_P01018465	A_55_P2153461	-0.97619	0
906	9	A_30_P01018465	A_51_P114817	0.785714	0.0106
907	10	A_30_P01018465	A_51_P131119	0.714286	0.0202
908	11	A_30_P01018465	A_51_P160581	0.952381	0.0003
909	12	A_30_P01018465	A_51_P315144	0.928571	0.0003
910	13	A_30_P01018465	A_51_P435844	0.714286	0.0211
911	14	A_30_P01018465	A_52_P1044655	0.785714	0.0109
912	15	A_30_P01018465	A_52_P1124229	0.928571	0.0006
913	16	A_30_P01018465	A_52_P125485	1	0
914	17	A_30_P01018465	A_52_P219089	0.714286	0.0247
915	18	A_30_P01018465	A_52_P322474	0.738095	0.0205
916	19	A_30_P01018465	A_52_P649817	0.833333	0.0042
917	20	A_30_P01018465	A_55_P1953107	0.952381	0.0001
918	21	A_30_P01018465	A_55_P1968099	0.714286	0.0238
919	22	A_30_P01018465	A_55_P1970279	0.761905	0.015
920	23	A_30_P01018465	A_55_P1973588	0.833333	0.0042
921	24	A_30_P01018465	A_55_P1976589	0.809524	0.0087
922	25	A_30_P01018465	A_55_P1977402	0.904762	0.001
923	26	A_30_P01018465	A_55_P1998641	0.809524	0.0076
924	27	A_30_P01018465	A_55_P2009767	0.952381	0.0001
925	28	A_30_P01018465	A_55_P2030465	0.928571	0.0011
926	29	A_30_P01018465	A_55_P2032553	0.714286	0.0248
927	30	A_30_P01018465	A_55_P2034091	0.738095	0.0161
928	31	A_30_P01018465	A_55_P2058275	0.809524	0.0077
929	32	A_30_P01018465	A_55_P2058761	0.761905	0.0141
930	33	A_30_P01018465	A_55_P2064702	0.857143	0.0034
931	34	A_30_P01018465	A_55_P2065815	0.761905	0.0149
932	35	A_30_P01018465	A_55_P2067321	0.785714	0.0116
933	36	A_30_P01018465	A_55_P2076215	0.738095	0.0173
934	37	A_30_P01018465	A_55_P2079475	0.904762	0.001
935	38	A_30_P01018465	A_55_P2079669	0.714286	0.0206
936	39	A_30_P01018465	A_55_P2084691	0.738095	0.0195
937	40	A_30_P01018465	A_55_P2094108	0.738095	0.0173
938	41	A_30_P01018465	A_55_P2096455	0.761905	0.0133
939	42	A_30_P01018465	A_55_P2105296	0.761905	0.0133
940	43	A_30_P01018465	A_55_P2109312	0.904762	0.0011
941	44	A_30_P01018465	A_55_P2114059	0.761905	0.012
942	45	A_30_P01018465	A_55_P2128144	0.904762	0.0012
943	46	A_30_P01018465	A_55_P2131452	0.714286	0.0225
944	47	A_30_P01018465	A_55_P2135895	0.785714	0.0124
945	48	A_30_P01018465	A_55_P2137628	0.738095	0.0152
946	49	A_30_P01018465	A_55_P2139216	0.761905	0.0141
947	50	A_30_P01018465	A_55_P2141686	0.714286	0.0221
948	51	A_30_P01018465	A_55_P2155116	0.809524	0.008
949	52	A_30_P01018465	A_55_P2165210	0.761905	0.0111
950	53	A_30_P01018465	A_55_P2330435	0.809524	0.0082
951	54	A_30_P01018465	A_55_P2350710	0.833333	0.0064
952	55	A_30_P01018465	A_55_P2362970	0.904762	0.0018
953	56	A_30_P01018465	A_55_P2371879	0.738095	0.0195
954	57	A_30_P01018465	A_66_P116657	0.809524	0.0071
955	58	A_30_P01018465	A_66_P123538	0.833333	0.0047
956	59	A_30_P01018465	A_66_P139159	0.809524	0.0087
957	60	A_30_P01018465	A_66_P139883	0.833333	0.0051
958	1	A_30_P01018678	A_52_P326664	0.738095	0.0213
959	2	A_30_P01018678	A_55_P2019683	-0.738095	0.0202
960	3	A_30_P01018678	A_51_P447189	0.738095	0.0212
961	4	A_30_P01018678	A_51_P501773	0.738095	0.0183
962	5	A_30_P01018678	A_52_P598835	0.738095	0.0193
963	6	A_30_P01018678	A_55_P1957294	0.809524	0.0077
964	7	A_30_P01018678	A_55_P1960441	0.738095	0.0166
965	8	A_30_P01018678	A_55_P1968340	0.738095	0.0177
966	9	A_30_P01018678	A_55_P1975989	0.738095	0.0162
967	10	A_30_P01018678	A_55_P1981455	0.738095	0.0201
968	11	A_30_P01018678	A_55_P2000489	0.761905	0.0125
969	12	A_30_P01018678	A_55_P2005525	0.761905	0.014
970	13	A_30_P01018678	A_55_P2017681	0.857143	0.0042
971	14	A_30_P01018678	A_55_P2023285	0.714286	0.0237
972	15	A_30_P01018678	A_55_P2032985	0.833333	0.0061
973	16	A_30_P01018678	A_55_P2038467	0.714286	0.0233
974	17	A_30_P01018678	A_55_P2048855	0.714286	0.0229
975	18	A_30_P01018678	A_55_P2054703	0.952381	0
976	19	A_30_P01018678	A_55_P2071472	0.761905	0.0154
977	20	A_30_P01018678	A_55_P2090577	0.809524	0.0077
978	21	A_30_P01018678	A_55_P2098494	0.738095	0.0191
979	22	A_30_P01018678	A_55_P2115300	0.833333	0.0043
980	23	A_30_P01018678	A_55_P2132873	0.833333	0.0043
981	24	A_30_P01018678	A_55_P2166238	0.738095	0.019
982	25	A_30_P01018678	A_55_P2179925	0.904762	0.0006
983	26	A_30_P01018678	A_55_P2181404	0.738095	0.0182
984	27	A_30_P01018678	A_55_P2285599	0.809524	0.0093
985	28	A_30_P01018678	A_55_P2295691	0.714286	0.0231
986	29	A_30_P01018678	A_55_P2330069	0.714286	0.0243
987	30	A_30_P01018678	A_55_P2341667	0.738095	0.0187
988	31	A_30_P01018678	A_55_P2416494	0.952381	0
989	32	A_30_P01018678	A_66_P123666	0.761905	0.0146
990	33	A_30_P01018678	A_66_P138976	0.761905	0.0135
991	34	A_30_P01018678	A_66_P139646	0.761905	0.0147
992	35	A_30_P01018678	A_66_P139703	0.952381	0.0002
993	1	A_30_P01018907	A_51_P375201	-0.761905	0.0132
994	2	A_30_P01018907	A_52_P311148	-0.714286	0.0235
995	3	A_30_P01018907	A_55_P1953003	-0.714286	0.0237
996	4	A_30_P01018907	A_55_P2019683	-0.880952	0.0022
997	5	A_30_P01018907	A_55_P2045871	-0.904762	0.0016
998	6	A_30_P01018907	A_55_P2052939	-0.761905	0.0154
999	7	A_30_P01018907	A_55_P2096435	-0.857143	0.0043
1000	8	A_30_P01018907	A_55_P2138933	-0.857143	0.0031
1001	9	A_30_P01018907	A_51_P131216	0.738095	0.0173
1002	10	A_30_P01018907	A_51_P501773	0.738095	0.0212
1003	11	A_30_P01018907	A_52_P217796	0.904762	0.0012
1004	12	A_30_P01018907	A_52_P295140	0.738095	0.0177
1005	13	A_30_P01018907	A_52_P527260	0.761905	0.0122
1006	14	A_30_P01018907	A_52_P598835	0.857143	0.0039
1007	15	A_30_P01018907	A_52_P618009	0.761905	0.0135
1008	16	A_30_P01018907	A_52_P663413	0.833333	0.0049
1009	17	A_30_P01018907	A_52_P68087	0.738095	0.0189
1010	18	A_30_P01018907	A_55_P1957294	0.857143	0.0036
1011	19	A_30_P01018907	A_55_P1957498	0.761905	0.013
1012	20	A_30_P01018907	A_55_P1960441	0.714286	0.0211
1013	21	A_30_P01018907	A_55_P1964533	0.761905	0.0139
1014	22	A_30_P01018907	A_55_P1968340	0.714286	0.0247
1015	23	A_30_P01018907	A_55_P1985925	0.714286	0.0222
1016	24	A_30_P01018907	A_55_P1987151	0.738095	0.0188
1017	25	A_30_P01018907	A_55_P1997135	0.833333	0.005
1018	26	A_30_P01018907	A_55_P2003703	0.714286	0.0228
1019	27	A_30_P01018907	A_55_P2011877	0.761905	0.0133
1020	28	A_30_P01018907	A_55_P2023285	0.738095	0.0182
1021	29	A_30_P01018907	A_55_P2032985	0.833333	0.0045
1022	30	A_30_P01018907	A_55_P2038467	0.738095	0.0209
1023	31	A_30_P01018907	A_55_P2042984	0.857143	0.0037
1024	32	A_30_P01018907	A_55_P2054703	0.738095	0.0172
1025	33	A_30_P01018907	A_55_P2090577	0.738095	0.0195
1026	34	A_30_P01018907	A_55_P2098494	0.738095	0.0206
1027	35	A_30_P01018907	A_55_P2104884	0.761905	0.0148
1028	36	A_30_P01018907	A_55_P2106039	0.714286	0.0221
1029	37	A_30_P01018907	A_55_P2114779	0.714286	0.0239
1030	38	A_30_P01018907	A_55_P2132268	0.761905	0.0164
1031	39	A_30_P01018907	A_55_P2133007	0.833333	0.0069
1032	40	A_30_P01018907	A_55_P2142453	0.809524	0.0082
1033	41	A_30_P01018907	A_55_P2166238	0.880952	0.0029
1034	42	A_30_P01018907	A_55_P2177473	0.857143	0.0049
1035	43	A_30_P01018907	A_55_P2179925	0.809524	0.0088
1036	44	A_30_P01018907	A_55_P2284273	0.809524	0.0078
1037	45	A_30_P01018907	A_55_P2285599	0.785714	0.0111
1038	46	A_30_P01018907	A_55_P2295691	0.714286	0.0244
1039	47	A_30_P01018907	A_55_P2330069	0.714286	0.0222
1040	48	A_30_P01018907	A_55_P2339399	0.97619	0.0001
1041	49	A_30_P01018907	A_55_P2380900	0.785714	0.0087
1042	50	A_30_P01018907	A_55_P2416494	0.738095	0.0178
1043	51	A_30_P01018907	A_66_P114229	0.833333	0.0045
1044	52	A_30_P01018907	A_66_P131994	0.809524	0.0084
1045	53	A_30_P01018907	A_66_P139646	0.714286	0.022
1046	54	A_30_P01018907	A_66_P139703	0.714286	0.0227
1047	1	A_30_P01019061	A_55_P1977431	-0.714286	0.0246
1048	2	A_30_P01019061	A_55_P2040921	-0.714286	0.0203
1049	3	A_30_P01019061	A_55_P2091274	-0.714286	0.0231
1050	4	A_30_P01019061	A_51_P114817	0.809524	0.0075
1051	5	A_30_P01019061	A_51_P160581	0.714286	0.0248
1052	6	A_30_P01019061	A_51_P349888	0.738095	0.0152
1053	7	A_30_P01019061	A_51_P366680	0.785714	0.0112
1054	8	A_30_P01019061	A_51_P497768	0.714286	0.0234
1055	9	A_30_P01019061	A_52_P125485	0.738095	0.0216
1056	10	A_30_P01019061	A_52_P219089	0.738095	0.0195
1057	11	A_30_P01019061	A_52_P591310	0.809524	0.0088
1058	12	A_30_P01019061	A_52_P61520	0.761905	0.0151
1059	13	A_30_P01019061	A_52_P649817	0.880952	0.0018
1060	14	A_30_P01019061	A_55_P1952284	0.714286	0.0246
1061	15	A_30_P01019061	A_55_P1953107	0.761905	0.0118
1062	16	A_30_P01019061	A_55_P1968099	0.785714	0.0102
1063	17	A_30_P01019061	A_55_P1970279	0.738095	0.0191
1064	18	A_30_P01019061	A_55_P1973588	0.857143	0.0031
1065	19	A_30_P01019061	A_55_P2009767	0.714286	0.0223
1066	20	A_30_P01019061	A_55_P2017955	0.785714	0.0103
1067	21	A_30_P01019061	A_55_P2030465	0.714286	0.0222
1068	22	A_30_P01019061	A_55_P2036963	0.833333	0.0047
1069	23	A_30_P01019061	A_55_P2052655	0.880952	0.002
1070	24	A_30_P01019061	A_55_P2058761	0.738095	0.0184
1071	25	A_30_P01019061	A_55_P2059080	0.809524	0.0071
1072	26	A_30_P01019061	A_55_P2064702	0.738095	0.0186
1073	27	A_30_P01019061	A_55_P2067321	0.809524	0.0077
1074	28	A_30_P01019061	A_55_P2084691	0.833333	0.0047
1075	29	A_30_P01019061	A_55_P2085651	0.833333	0.0054
1076	30	A_30_P01019061	A_55_P2105296	0.857143	0.0043
1077	31	A_30_P01019061	A_55_P2106798	0.785714	0.0112
1078	32	A_30_P01019061	A_55_P2109312	0.738095	0.0171
1079	33	A_30_P01019061	A_55_P2120968	0.761905	0.0129
1080	34	A_30_P01019061	A_55_P2128144	0.809524	0.008
1081	35	A_30_P01019061	A_55_P2128203	0.714286	0.0246
1082	36	A_30_P01019061	A_55_P2135178	0.714286	0.0222
1083	37	A_30_P01019061	A_55_P2142321	0.761905	0.0148
1084	38	A_30_P01019061	A_55_P2155859	0.738095	0.0173
1085	39	A_30_P01019061	A_55_P2178036	0.952381	0.0003
1086	40	A_30_P01019061	A_55_P2183508	0.785714	0.0123
1087	41	A_30_P01019061	A_55_P2244360	0.761905	0.0147
1088	42	A_30_P01019061	A_55_P2330435	0.857143	0.0049
1089	43	A_30_P01019061	A_55_P2427150	0.761905	0.014
1090	44	A_30_P01019061	A_66_P100420	0.714286	0.0231
1091	45	A_30_P01019061	A_66_P139883	0.761905	0.0171
1092	1	A_30_P01019119	A_51_P153683	-0.738095	0.0171
1093	2	A_30_P01019119	A_51_P176583	-0.809524	0.0085
1094	3	A_30_P01019119	A_51_P198675	-0.880952	0.0019
1095	4	A_30_P01019119	A_51_P288341	-0.928571	0.0003
1096	5	A_30_P01019119	A_51_P428483	-0.952381	0.0001
1097	6	A_30_P01019119	A_52_P460836	-0.857143	0.0041
1098	7	A_30_P01019119	A_55_P1998086	-0.785714	0.0122
1099	8	A_30_P01019119	A_55_P2037081	-0.785714	0.0123
1100	9	A_30_P01019119	A_55_P2042813	-0.857143	0.003
1101	10	A_30_P01019119	A_55_P2131328	-0.809524	0.0066
1102	11	A_30_P01019119	A_55_P2369048	-0.761905	0.0149
1103	12	A_30_P01019119	A_51_P114817	0.904762	0.0012
1104	13	A_30_P01019119	A_51_P189082	0.904762	0.0014
1105	14	A_30_P01019119	A_51_P193813	0.738095	0.0207
1106	15	A_30_P01019119	A_51_P336599	0.880952	0.0025
1107	16	A_30_P01019119	A_51_P349888	0.785714	0.0109
1108	17	A_30_P01019119	A_51_P376445	0.833333	0.0064
1109	18	A_30_P01019119	A_51_P414208	0.714286	0.0237
1110	19	A_30_P01019119	A_51_P435629	0.880952	0.0029
1111	20	A_30_P01019119	A_51_P475816	0.761905	0.0153
1112	21	A_30_P01019119	A_52_P1044655	0.785714	0.0087
1113	22	A_30_P01019119	A_52_P1124229	0.761905	0.0127
1114	23	A_30_P01019119	A_52_P219089	0.833333	0.0051
1115	24	A_30_P01019119	A_52_P61520	0.857143	0.0047
1116	25	A_30_P01019119	A_55_P1963011	0.761905	0.0135
1117	26	A_30_P01019119	A_55_P1964252	0.857143	0.0037
1118	27	A_30_P01019119	A_55_P1966070	0.761905	0.0112
1119	28	A_30_P01019119	A_55_P1968099	0.785714	0.0114
1120	29	A_30_P01019119	A_55_P1977402	0.785714	0.013
1121	30	A_30_P01019119	A_55_P1981030	0.761905	0.0125
1122	31	A_30_P01019119	A_55_P1987970	0.809524	0.0081
1123	32	A_30_P01019119	A_55_P1998641	0.738095	0.0179
1124	33	A_30_P01019119	A_55_P2009767	0.714286	0.0239
1125	34	A_30_P01019119	A_55_P2011096	0.761905	0.0139
1126	35	A_30_P01019119	A_55_P2012702	0.928571	0.0004
1127	36	A_30_P01019119	A_55_P2017955	0.809524	0.0084
1128	37	A_30_P01019119	A_55_P2023021	0.785714	0.0115
1129	38	A_30_P01019119	A_55_P2025538	0.761905	0.0124
1130	39	A_30_P01019119	A_55_P2030465	0.833333	0.0046
1131	40	A_30_P01019119	A_55_P2030612	0.785714	0.0105
1132	41	A_30_P01019119	A_55_P2032014	0.809524	0.0082
1133	42	A_30_P01019119	A_55_P2042688	0.857143	0.0035
1134	43	A_30_P01019119	A_55_P2059701	0.761905	0.0131
1135	44	A_30_P01019119	A_55_P2061025	0.809524	0.0076
1136	45	A_30_P01019119	A_55_P2064702	0.904762	0.0012
1137	46	A_30_P01019119	A_55_P2065815	0.952381	0
1138	47	A_30_P01019119	A_55_P2067321	0.904762	0.0006
1139	48	A_30_P01019119	A_55_P2074425	0.738095	0.0196
1140	49	A_30_P01019119	A_55_P2076219	0.738095	0.0188
1141	50	A_30_P01019119	A_55_P2079669	0.880952	0.0036
1142	51	A_30_P01019119	A_55_P2084621	0.738095	0.0183
1143	52	A_30_P01019119	A_55_P2085651	0.809524	0.0073
1144	53	A_30_P01019119	A_55_P2087840	0.761905	0.0144
1145	54	A_30_P01019119	A_55_P2091297	0.809524	0.0082
1146	55	A_30_P01019119	A_55_P2094108	0.809524	0.0077
1147	56	A_30_P01019119	A_55_P2096455	0.833333	0.005
1148	57	A_30_P01019119	A_55_P2101108	0.738095	0.0158
1149	58	A_30_P01019119	A_55_P2103452	0.761905	0.0142
1150	59	A_30_P01019119	A_55_P2107457	0.857143	0.0037
1151	60	A_30_P01019119	A_55_P2109312	0.785714	0.012
1152	61	A_30_P01019119	A_55_P2113758	0.809524	0.0061
1153	62	A_30_P01019119	A_55_P2114059	0.833333	0.0056
1154	63	A_30_P01019119	A_55_P2120968	0.880952	0.003
1155	64	A_30_P01019119	A_55_P2126002	0.833333	0.006
1156	65	A_30_P01019119	A_55_P2128582	0.714286	0.0224
1157	66	A_30_P01019119	A_55_P2131452	0.761905	0.0149
1158	67	A_30_P01019119	A_55_P2135895	0.904762	0.0008
1159	68	A_30_P01019119	A_55_P2139216	0.857143	0.0035
1160	69	A_30_P01019119	A_55_P2141645	0.738095	0.0177
1161	70	A_30_P01019119	A_55_P2143499	0.785714	0.0127
1162	71	A_30_P01019119	A_55_P2155116	0.738095	0.0165
1163	72	A_30_P01019119	A_55_P2163383	0.97619	0
1164	73	A_30_P01019119	A_55_P2165210	0.761905	0.0132
1165	74	A_30_P01019119	A_55_P2168511	0.738095	0.0179
1166	75	A_30_P01019119	A_55_P2238933	0.761905	0.0137
1167	76	A_30_P01019119	A_55_P2305623	0.809524	0.008
1168	77	A_30_P01019119	A_55_P2330435	0.833333	0.0049
1169	78	A_30_P01019119	A_55_P2350710	0.880952	0.0021
1170	79	A_30_P01019119	A_55_P2361932	0.857143	0.004
1171	80	A_30_P01019119	A_55_P2362970	0.880952	0.0025
1172	81	A_30_P01019119	A_55_P2371879	0.904762	0.0006
1173	82	A_30_P01019119	A_55_P2427150	0.928571	0.0007
1174	83	A_30_P01019119	A_66_P130067	0.785714	0.0115
1175	84	A_30_P01019119	A_66_P135124	0.761905	0.0143
1176	85	A_30_P01019119	A_66_P139883	0.738095	0.0196
1177	1	A_30_P01019171	A_55_P2054027	-0.714286	0.0224
1178	2	A_30_P01019171	A_55_P2062171	-0.761905	0.0134
1179	3	A_30_P01019171	A_51_P137452	0.904762	0.0009
1180	4	A_30_P01019171	A_51_P516198	0.857143	0.003
1181	5	A_30_P01019171	A_52_P188856	0.857143	0.0039
1182	6	A_30_P01019171	A_52_P217796	0.714286	0.022
1183	7	A_30_P01019171	A_52_P468068	0.738095	0.0167
1184	8	A_30_P01019171	A_52_P527260	0.738095	0.021
1185	9	A_30_P01019171	A_52_P628915	0.880952	0.002
1186	10	A_30_P01019171	A_52_P68087	0.714286	0.0214
1187	11	A_30_P01019171	A_55_P1957498	0.738095	0.0186
1188	12	A_30_P01019171	A_55_P1957729	0.785714	0.0111
1189	13	A_30_P01019171	A_55_P1959650	0.714286	0.0225
1190	14	A_30_P01019171	A_55_P1960108	0.904762	0.0013
1191	15	A_30_P01019171	A_55_P1979126	0.714286	0.0241
1192	16	A_30_P01019171	A_55_P1987117	0.761905	0.0143
1193	17	A_30_P01019171	A_55_P2006430	0.904762	0.0014
1194	18	A_30_P01019171	A_55_P2008141	0.714286	0.0245
1195	19	A_30_P01019171	A_55_P2012281	0.714286	0.0236
1196	20	A_30_P01019171	A_55_P2015249	0.857143	0.0021
1197	21	A_30_P01019171	A_55_P2017681	0.714286	0.0243
1198	22	A_30_P01019171	A_55_P2023285	0.833333	0.0056
1199	23	A_30_P01019171	A_55_P2029732	0.904762	0.0014
1200	24	A_30_P01019171	A_55_P2038467	0.833333	0.0038
1201	25	A_30_P01019171	A_55_P2045750	0.785714	0.0119
1202	26	A_30_P01019171	A_55_P2064361	0.714286	0.0238
1203	27	A_30_P01019171	A_55_P2098494	0.714286	0.0227
1204	28	A_30_P01019171	A_55_P2106798	0.738095	0.018
1205	29	A_30_P01019171	A_55_P2114779	0.904762	0.0012
1206	30	A_30_P01019171	A_55_P2115300	0.761905	0.014
1207	31	A_30_P01019171	A_55_P2128203	0.761905	0.0135
1208	32	A_30_P01019171	A_55_P2131283	0.833333	0.0057
1209	33	A_30_P01019171	A_55_P2132268	0.904762	0.0014
1210	34	A_30_P01019171	A_55_P2132873	0.714286	0.0205
1211	35	A_30_P01019171	A_55_P2137628	0.809524	0.0068
1212	36	A_30_P01019171	A_55_P2295691	0.761905	0.0135
1213	37	A_30_P01019171	A_55_P2353079	0.714286	0.021
1214	38	A_30_P01019171	A_55_P2353457	0.833333	0.0052
1215	39	A_30_P01019171	A_55_P2416837	0.880952	0.0034
1216	1	A_30_P01019388	A_55_P1988043	-0.761905	0.0148
1217	2	A_30_P01019388	A_55_P2095727	0.714286	0.0231
1218	3	A_30_P01019388	A_51_P225484	0.738095	0.0149
1219	4	A_30_P01019388	A_51_P278653	0.761905	0.0155
1220	5	A_30_P01019388	A_51_P328631	0.714286	0.0238
1221	6	A_30_P01019388	A_51_P516198	0.785714	0.0102
1222	7	A_30_P01019388	A_52_P203560	0.833333	0.0067
1223	8	A_30_P01019388	A_52_P820196	0.761905	0.0125
1224	9	A_30_P01019388	A_55_P1957729	0.857143	0.003
1225	10	A_30_P01019388	A_55_P1965911	0.785714	0.0114
1226	11	A_30_P01019388	A_55_P1979126	0.809524	0.0071
1227	12	A_30_P01019388	A_55_P1979888	0.857143	0.0028
1228	13	A_30_P01019388	A_55_P1981455	0.761905	0.0142
1229	14	A_30_P01019388	A_55_P1987117	0.904762	0.0011
1230	15	A_30_P01019388	A_55_P2000489	0.761905	0.0133
1231	16	A_30_P01019388	A_55_P2003048	0.785714	0.0111
1232	17	A_30_P01019388	A_55_P2006430	0.714286	0.0228
1233	18	A_30_P01019388	A_55_P2008507	0.738095	0.0167
1234	19	A_30_P01019388	A_55_P2038643	0.952381	0.0003
1235	20	A_30_P01019388	A_55_P2071472	0.738095	0.0181
1236	21	A_30_P01019388	A_55_P2168286	0.738095	0.0169
1237	22	A_30_P01019388	A_55_P2416837	0.714286	0.0235
1238	23	A_30_P01019388	A_55_P2430367	0.761905	0.0143
1239	24	A_30_P01019388	A_66_P126640	0.738095	0.0196
1240	1	A_30_P01019524	A_52_P31543	0.738095	0.0179
1241	2	A_30_P01019524	A_55_P1988043	-0.785714	0.0096
1242	3	A_30_P01019524	A_51_P225484	0.714286	0.0205
1243	4	A_30_P01019524	A_51_P278653	0.97619	0
1244	5	A_30_P01019524	A_51_P379552	0.761905	0.014
1245	6	A_30_P01019524	A_55_P1952284	0.785714	0.0115
1246	7	A_30_P01019524	A_55_P1952379	0.761905	0.0142
1247	8	A_30_P01019524	A_55_P1960896	0.761905	0.014
1248	9	A_30_P01019524	A_55_P1976972	0.785714	0.0098
1249	10	A_30_P01019524	A_55_P1977299	0.761905	0.0157
1250	11	A_30_P01019524	A_55_P1987554	0.809524	0.0071
1251	12	A_30_P01019524	A_55_P2003048	0.761905	0.014
1252	13	A_30_P01019524	A_55_P2008507	0.761905	0.0144
1253	14	A_30_P01019524	A_55_P2015541	0.809524	0.0085
1254	15	A_30_P01019524	A_55_P2038643	0.833333	0.0067
1255	16	A_30_P01019524	A_55_P2040594	0.761905	0.0151
1256	17	A_30_P01019524	A_55_P2041444	0.785714	0.0133
1257	18	A_30_P01019524	A_55_P2080587	0.761905	0.0136
1258	19	A_30_P01019524	A_55_P2106798	0.761905	0.0154
1259	20	A_30_P01019524	A_55_P2127482	0.833333	0.0039
1260	21	A_30_P01019524	A_55_P2128203	0.714286	0.0214
1261	22	A_30_P01019524	A_55_P2168286	0.761905	0.0152
1262	23	A_30_P01019524	A_66_P128120	0.809524	0.0077
1263	1	A_30_P01019533	A_51_P153683	-0.880952	0.0028
1264	2	A_30_P01019533	A_51_P198675	-0.880952	0.0013
1265	3	A_30_P01019533	A_51_P288341	-0.97619	0
1266	4	A_30_P01019533	A_51_P428483	-0.857143	0.0045
1267	5	A_30_P01019533	A_52_P326664	-0.738095	0.0184
1268	6	A_30_P01019533	A_52_P460836	-0.690476	0.0235
1269	7	A_30_P01019533	A_55_P1977431	-0.785714	0.0103
1270	8	A_30_P01019533	A_55_P1998086	-0.785714	0.0128
1271	9	A_30_P01019533	A_55_P2037081	-0.833333	0.0051
1272	10	A_30_P01019533	A_55_P2042813	-0.809524	0.0061
1273	11	A_30_P01019533	A_55_P2153461	-0.809524	0.0072
1274	12	A_30_P01019533	A_51_P114817	0.833333	0.0042
1275	13	A_30_P01019533	A_51_P131119	0.761905	0.0153
1276	14	A_30_P01019533	A_51_P149267	0.809524	0.0078
1277	15	A_30_P01019533	A_51_P160581	0.738095	0.0146
1278	16	A_30_P01019533	A_51_P189082	0.833333	0.0072
1279	17	A_30_P01019533	A_51_P193813	0.785714	0.0114
1280	18	A_30_P01019533	A_51_P201308	0.714286	0.0241
1281	19	A_30_P01019533	A_51_P336599	0.761905	0.0139
1282	20	A_30_P01019533	A_51_P349888	0.714286	0.0215
1283	21	A_30_P01019533	A_51_P376445	0.97619	0.0001
1284	22	A_30_P01019533	A_51_P379552	0.714286	0.021
1285	23	A_30_P01019533	A_51_P398089	0.714286	0.0248
1286	24	A_30_P01019533	A_51_P414208	0.809524	0.007
1287	25	A_30_P01019533	A_51_P435629	0.761905	0.015
1288	26	A_30_P01019533	A_51_P462271	0.714286	0.0217
1289	27	A_30_P01019533	A_51_P475816	0.833333	0.0065
1290	28	A_30_P01019533	A_51_P497768	0.761905	0.0155
1291	29	A_30_P01019533	A_52_P1124229	0.761905	0.0133
1292	30	A_30_P01019533	A_52_P125485	0.761905	0.014
1293	31	A_30_P01019533	A_52_P219089	0.809524	0.008
1294	32	A_30_P01019533	A_52_P61520	0.761905	0.0138
1295	33	A_30_P01019533	A_55_P1953107	0.761905	0.0133
1296	34	A_30_P01019533	A_55_P1955084	0.904762	0.0014
1297	35	A_30_P01019533	A_55_P1959650	0.857143	0.0036
1298	36	A_30_P01019533	A_55_P1963011	0.761905	0.0153
1299	37	A_30_P01019533	A_55_P1966070	0.833333	0.0045
1300	38	A_30_P01019533	A_55_P1968099	0.833333	0.0054
1301	39	A_30_P01019533	A_55_P1970279	0.761905	0.012
1302	40	A_30_P01019533	A_55_P1976589	0.761905	0.0135
1303	41	A_30_P01019533	A_55_P1977299	0.785714	0.011
1304	42	A_30_P01019533	A_55_P1977402	0.809524	0.0086
1305	43	A_30_P01019533	A_55_P1981030	0.952381	0.0001
1306	44	A_30_P01019533	A_55_P1998204	0.738095	0.0165
1307	45	A_30_P01019533	A_55_P1998641	0.738095	0.0183
1308	46	A_30_P01019533	A_55_P2002787	0.809524	0.0061
1309	47	A_30_P01019533	A_55_P2006400	0.761905	0.0159
1310	48	A_30_P01019533	A_55_P2009483	0.738095	0.0217
1311	49	A_30_P01019533	A_55_P2009767	0.857143	0.0037
1312	50	A_30_P01019533	A_55_P2011096	0.857143	0.0035
1313	51	A_30_P01019533	A_55_P2012281	0.761905	0.0152
1314	52	A_30_P01019533	A_55_P2012702	0.880952	0.0019
1315	53	A_30_P01019533	A_55_P2017955	0.738095	0.0196
1316	54	A_30_P01019533	A_55_P2023021	0.833333	0.0051
1317	55	A_30_P01019533	A_55_P2030465	0.880952	0.0025
1318	56	A_30_P01019533	A_55_P2030612	0.833333	0.0047
1319	57	A_30_P01019533	A_55_P2032014	0.738095	0.0165
1320	58	A_30_P01019533	A_55_P2040594	0.761905	0.0159
1321	59	A_30_P01019533	A_55_P2042688	0.714286	0.0218
1322	60	A_30_P01019533	A_55_P2045750	0.738095	0.0198
1323	61	A_30_P01019533	A_55_P2058761	0.761905	0.0147
1324	62	A_30_P01019533	A_55_P2064702	0.904762	0.0013
1325	63	A_30_P01019533	A_55_P2065815	0.857143	0.0025
1326	64	A_30_P01019533	A_55_P2067321	0.833333	0.0067
1327	65	A_30_P01019533	A_55_P2076215	0.785714	0.0116
1328	66	A_30_P01019533	A_55_P2076219	0.809524	0.0072
1329	67	A_30_P01019533	A_55_P2079475	0.809524	0.0088
1330	68	A_30_P01019533	A_55_P2079669	0.880952	0.0029
1331	69	A_30_P01019533	A_55_P2079922	0.857143	0.0034
1332	70	A_30_P01019533	A_55_P2080587	0.761905	0.0144
1333	71	A_30_P01019533	A_55_P2085651	0.761905	0.0133
1334	72	A_30_P01019533	A_55_P2091297	0.904762	0.001
1335	73	A_30_P01019533	A_55_P2094108	0.714286	0.0249
1336	74	A_30_P01019533	A_55_P2096455	0.928571	0.0004
1337	75	A_30_P01019533	A_55_P2105296	0.761905	0.0117
1338	76	A_30_P01019533	A_55_P2107457	0.761905	0.0155
1339	77	A_30_P01019533	A_55_P2109312	0.857143	0.0038
1340	78	A_30_P01019533	A_55_P2113690	0.785714	0.0113
1341	79	A_30_P01019533	A_55_P2113758	0.857143	0.004
1342	80	A_30_P01019533	A_55_P2114059	0.928571	0.0006
1343	81	A_30_P01019533	A_55_P2120968	0.738095	0.019
1344	82	A_30_P01019533	A_55_P2124923	0.738095	0.0163
1345	83	A_30_P01019533	A_55_P2128144	0.714286	0.0236
1346	84	A_30_P01019533	A_55_P2128582	0.785714	0.0102
1347	85	A_30_P01019533	A_55_P2135895	0.904762	0.0007
1348	86	A_30_P01019533	A_55_P2137628	0.738095	0.0188
1349	87	A_30_P01019533	A_55_P2139216	1	0
1350	88	A_30_P01019533	A_55_P2141645	0.785714	0.0099
1351	89	A_30_P01019533	A_55_P2143499	0.761905	0.0151
1352	90	A_30_P01019533	A_55_P2155116	0.833333	0.0051
1353	91	A_30_P01019533	A_55_P2159315	0.785714	0.0098
1354	92	A_30_P01019533	A_55_P2163383	0.809524	0.0079
1355	93	A_30_P01019533	A_55_P2165210	0.714286	0.0235
1356	94	A_30_P01019533	A_55_P2168286	0.714286	0.0227
1357	95	A_30_P01019533	A_55_P2176953	0.738095	0.0169
1358	96	A_30_P01019533	A_55_P2185410	0.809524	0.0078
1359	97	A_30_P01019533	A_55_P2238933	0.714286	0.0235
1360	98	A_30_P01019533	A_55_P2330435	0.833333	0.0055
1361	99	A_30_P01019533	A_55_P2350710	0.952381	0.0004
1362	100	A_30_P01019533	A_55_P2361932	0.785714	0.0122
1363	101	A_30_P01019533	A_55_P2362970	0.904762	0.0013
1364	102	A_30_P01019533	A_55_P2371879	0.904762	0.0018
1365	103	A_30_P01019533	A_55_P2427150	0.785714	0.0111
1366	104	A_30_P01019533	A_66_P101132	0.785714	0.0099
1367	105	A_30_P01019533	A_66_P123538	0.809524	0.0087
1368	106	A_30_P01019533	A_66_P130067	0.809524	0.0068
1369	107	A_30_P01019533	A_66_P135124	0.833333	0.0052
1370	108	A_30_P01019533	A_66_P139159	0.690476	0.0245
1371	109	A_30_P01019533	A_66_P139883	0.761905	0.0132
1372	1	A_30_P01019576	A_51_P258768	-0.880952	0.0023
1373	2	A_30_P01019576	A_51_P288341	-0.761905	0.0133
1374	3	A_30_P01019576	A_51_P428483	-0.714286	0.0226
1375	4	A_30_P01019576	A_55_P2042813	-0.761905	0.0158
1376	5	A_30_P01019576	A_55_P2369048	-0.714286	0.0226
1377	6	A_30_P01019576	A_51_P149267	0.761905	0.0105
1378	7	A_30_P01019576	A_51_P185660	0.928571	0.0003
1379	8	A_30_P01019576	A_51_P189082	0.738095	0.0185
1380	9	A_30_P01019576	A_51_P193813	0.761905	0.0118
1381	10	A_30_P01019576	A_51_P316199	0.785714	0.0111
1382	11	A_30_P01019576	A_51_P320022	0.761905	0.0146
1383	12	A_30_P01019576	A_51_P328631	0.738095	0.017
1384	13	A_30_P01019576	A_51_P366680	0.714286	0.023
1385	14	A_30_P01019576	A_51_P376445	0.761905	0.014
1386	15	A_30_P01019576	A_51_P414208	1	0
1387	16	A_30_P01019576	A_51_P462271	0.952381	0.0001
1388	17	A_30_P01019576	A_52_P188856	0.809524	0.0063
1389	18	A_30_P01019576	A_52_P219089	0.833333	0.0053
1390	19	A_30_P01019576	A_52_P385736	0.738095	0.0194
1391	20	A_30_P01019576	A_55_P1955084	0.880952	0.0021
1392	21	A_30_P01019576	A_55_P1957498	0.714286	0.0225
1393	22	A_30_P01019576	A_55_P1959650	0.97619	0
1394	23	A_30_P01019576	A_55_P1960108	0.809524	0.0083
1395	24	A_30_P01019576	A_55_P1966070	0.880952	0.0023
1396	25	A_30_P01019576	A_55_P1968099	0.761905	0.0144
1397	26	A_30_P01019576	A_55_P1977299	0.785714	0.0117
1398	27	A_30_P01019576	A_55_P1979126	0.904762	0.0015
1399	28	A_30_P01019576	A_55_P1979888	0.809524	0.0075
1400	29	A_30_P01019576	A_55_P1981030	0.904762	0.0008
1401	30	A_30_P01019576	A_55_P1998204	0.761905	0.0162
1402	31	A_30_P01019576	A_55_P2002787	0.761905	0.0128
1403	32	A_30_P01019576	A_55_P2006430	0.714286	0.0211
1404	33	A_30_P01019576	A_55_P2008141	0.857143	0.005
1405	34	A_30_P01019576	A_55_P2008507	0.785714	0.0099
1406	35	A_30_P01019576	A_55_P2008795	0.714286	0.02
1407	36	A_30_P01019576	A_55_P2009483	0.809524	0.0067
1408	37	A_30_P01019576	A_55_P2011096	0.904762	0.0013
1409	38	A_30_P01019576	A_55_P2012281	0.928571	0.0005
1410	39	A_30_P01019576	A_55_P2012702	0.809524	0.0082
1411	40	A_30_P01019576	A_55_P2013470	0.785714	0.0113
1412	41	A_30_P01019576	A_55_P2015249	0.761905	0.0135
1413	42	A_30_P01019576	A_55_P2023021	0.857143	0.0024
1414	43	A_30_P01019576	A_55_P2030612	0.857143	0.0028
1415	44	A_30_P01019576	A_55_P2032014	0.928571	0.0005
1416	45	A_30_P01019576	A_55_P2040594	0.809524	0.0064
1417	46	A_30_P01019576	A_55_P2042606	0.809524	0.0093
1418	47	A_30_P01019576	A_55_P2042688	0.809524	0.007
1419	48	A_30_P01019576	A_55_P2045750	0.833333	0.0056
1420	49	A_30_P01019576	A_55_P2064361	0.761905	0.013
1421	50	A_30_P01019576	A_55_P2064702	0.761905	0.0147
1422	51	A_30_P01019576	A_55_P2074425	0.904762	0.0011
1423	52	A_30_P01019576	A_55_P2076219	0.880952	0.002
1424	53	A_30_P01019576	A_55_P2079922	0.857143	0.0039
1425	54	A_30_P01019576	A_55_P2080587	0.809524	0.0076
1426	55	A_30_P01019576	A_55_P2084621	0.785714	0.0119
1427	56	A_30_P01019576	A_55_P2085651	0.809524	0.0091
1428	57	A_30_P01019576	A_55_P2091297	0.761905	0.013
1429	58	A_30_P01019576	A_55_P2096455	0.809524	0.0072
1430	59	A_30_P01019576	A_55_P2107457	0.857143	0.0038
1431	60	A_30_P01019576	A_55_P2113690	0.833333	0.0054
1432	61	A_30_P01019576	A_55_P2113758	0.857143	0.0039
1433	62	A_30_P01019576	A_55_P2114059	0.809524	0.0089
1434	63	A_30_P01019576	A_55_P2118614	0.738095	0.0174
1435	64	A_30_P01019576	A_55_P2120968	0.809524	0.0076
1436	65	A_30_P01019576	A_55_P2128203	0.809524	0.0061
1437	66	A_30_P01019576	A_55_P2139216	0.809524	0.0079
1438	67	A_30_P01019576	A_55_P2141645	0.952381	0.0002
1439	68	A_30_P01019576	A_55_P2159315	0.904762	0.0016
1440	69	A_30_P01019576	A_55_P2168286	0.904762	0.0013
1441	70	A_30_P01019576	A_55_P2168511	0.738095	0.0193
1442	71	A_30_P01019576	A_55_P2185410	0.952381	0.0001
1443	72	A_30_P01019576	A_55_P2238933	0.714286	0.023
1444	73	A_30_P01019576	A_55_P2330435	0.761905	0.0136
1445	74	A_30_P01019576	A_55_P2350710	0.785714	0.0108
1446	75	A_30_P01019576	A_55_P2371879	0.809524	0.0076
1447	76	A_30_P01019576	A_55_P2416837	0.833333	0.0061
1448	77	A_30_P01019576	A_55_P2427150	0.714286	0.024
1449	78	A_30_P01019576	A_66_P128120	0.738095	0.0187
1450	79	A_30_P01019576	A_66_P130067	0.880952	0.0022
1451	80	A_30_P01019576	A_66_P135124	0.738095	0.0195
1452	1	A_30_P01019584	A_51_P258768	-0.714286	0.0219
1453	2	A_30_P01019584	A_55_P2042813	-0.809524	0.0085
1454	3	A_30_P01019584	A_55_P2369048	-0.857143	0.0033
1455	4	A_30_P01019584	A_51_P170807	0.785714	0.0116
1456	5	A_30_P01019584	A_51_P339564	0.857143	0.0038
1457	6	A_30_P01019584	A_51_P366680	0.857143	0.0042
1458	7	A_30_P01019584	A_51_P505967	0.738095	0.0195
1459	8	A_30_P01019584	A_52_P188856	0.785714	0.0102
1460	9	A_30_P01019584	A_52_P219089	0.833333	0.0058
1461	10	A_30_P01019584	A_52_P379474	0.738095	0.0176
1462	11	A_30_P01019584	A_55_P1966070	0.809524	0.0069
1463	12	A_30_P01019584	A_55_P2015249	0.761905	0.0148
1464	13	A_30_P01019584	A_55_P2032014	0.761905	0.0152
1465	14	A_30_P01019584	A_55_P2045750	0.880952	0.0022
1466	15	A_30_P01019584	A_55_P2085651	0.785714	0.0104
1467	16	A_30_P01019584	A_55_P2096455	0.738095	0.0185
1468	17	A_30_P01019584	A_55_P2101108	0.952381	0.0001
1469	18	A_30_P01019584	A_55_P2107457	0.809524	0.007
1470	19	A_30_P01019584	A_55_P2109312	0.714286	0.0227
1471	20	A_30_P01019584	A_55_P2113758	0.833333	0.0048
1472	21	A_30_P01019584	A_55_P2114059	0.738095	0.0183
1473	22	A_30_P01019584	A_55_P2142321	0.809524	0.0068
1474	23	A_30_P01019584	A_55_P2143120	0.928571	0.0006
1475	24	A_30_P01019584	A_55_P2238933	0.857143	0.004
1476	25	A_30_P01019584	A_66_P130067	0.761905	0.0149
1477	1	A_30_P01019738	A_51_P258768	-0.714286	0.0249
1478	2	A_30_P01019738	A_55_P1962551	-0.690476	0.0242
1479	3	A_30_P01019738	A_55_P2037081	-0.761905	0.0126
1480	4	A_30_P01019738	A_55_P2042813	-0.880952	0.0025
1481	5	A_30_P01019738	A_55_P2369048	-0.761905	0.0137
1482	6	A_30_P01019738	A_51_P137452	0.714286	0.0244
1483	7	A_30_P01019738	A_51_P185660	0.809524	0.0058
1484	8	A_30_P01019738	A_51_P201308	0.809524	0.0075
1485	9	A_30_P01019738	A_51_P316199	0.714286	0.0218
1486	10	A_30_P01019738	A_51_P366680	0.738095	0.0217
1487	11	A_30_P01019738	A_51_P410205	0.880952	0.0017
1488	12	A_30_P01019738	A_51_P414208	0.761905	0.0161
1489	13	A_30_P01019738	A_51_P462271	0.738095	0.0157
1490	14	A_30_P01019738	A_52_P188856	0.904762	0.0005
1491	15	A_30_P01019738	A_52_P219089	0.880952	0.002
1492	16	A_30_P01019738	A_55_P1959650	0.809524	0.0072
1493	17	A_30_P01019738	A_55_P1960108	0.761905	0.0136
1494	18	A_30_P01019738	A_55_P1966070	0.904762	0.0013
1495	19	A_30_P01019738	A_55_P1999756	0.738095	0.0174
1496	20	A_30_P01019738	A_55_P2006400	0.714286	0.0198
1497	21	A_30_P01019738	A_55_P2008141	0.809524	0.0076
1498	22	A_30_P01019738	A_55_P2008403	0.880952	0.0024
1499	23	A_30_P01019738	A_55_P2012281	0.928571	0.0009
1500	24	A_30_P01019738	A_55_P2015249	0.809524	0.0077
1501	25	A_30_P01019738	A_55_P2030465	0.714286	0.0238
1502	26	A_30_P01019738	A_55_P2032014	0.809524	0.0076
1503	27	A_30_P01019738	A_55_P2042606	0.904762	0.0011
1504	28	A_30_P01019738	A_55_P2043277	0.738095	0.0199
1505	29	A_30_P01019738	A_55_P2045750	0.928571	0.0006
1506	30	A_30_P01019738	A_55_P2064361	0.761905	0.013
1507	31	A_30_P01019738	A_55_P2064702	0.738095	0.0164
1508	32	A_30_P01019738	A_55_P2079922	0.833333	0.0064
1509	33	A_30_P01019738	A_55_P2085651	0.809524	0.0084
1510	34	A_30_P01019738	A_55_P2091297	0.857143	0.0028
1511	35	A_30_P01019738	A_55_P2096455	0.833333	0.0069
1512	36	A_30_P01019738	A_55_P2101108	0.761905	0.0136
1513	37	A_30_P01019738	A_55_P2105416	0.785714	0.0105
1514	38	A_30_P01019738	A_55_P2107457	0.833333	0.0053
1515	39	A_30_P01019738	A_55_P2109312	0.809524	0.0075
1516	40	A_30_P01019738	A_55_P2113758	0.880952	0.0028
1517	41	A_30_P01019738	A_55_P2114059	0.833333	0.0065
1518	42	A_30_P01019738	A_55_P2137628	0.809524	0.0084
1519	43	A_30_P01019738	A_55_P2143120	0.738095	0.0174
1520	44	A_30_P01019738	A_55_P2148931	0.833333	0.0062
1521	45	A_30_P01019738	A_55_P2157517	0.809524	0.0072
1522	46	A_30_P01019738	A_55_P2176953	0.714286	0.0227
1523	47	A_30_P01019738	A_55_P2185410	0.857143	0.0043
1524	48	A_30_P01019738	A_55_P2238933	0.714286	0.0237
1525	49	A_30_P01019738	A_55_P2330435	0.761905	0.0152
1526	50	A_30_P01019738	A_55_P2416837	0.714286	0.0214
1527	51	A_30_P01019738	A_66_P130067	0.761905	0.0133
1528	1	A_30_P01019745	A_52_P311148	-0.904762	0.0019
1529	2	A_30_P01019745	A_52_P326664	0.809524	0.0071
1530	3	A_30_P01019745	A_55_P1953003	-0.785714	0.0109
1531	4	A_30_P01019745	A_55_P1993168	0.904762	0.0008
1532	5	A_30_P01019745	A_55_P2019683	-0.952381	0.0001
1533	6	A_30_P01019745	A_55_P2119683	0.880952	0.0023
1534	7	A_30_P01019745	A_55_P2136880	-0.714286	0.022
1535	8	A_30_P01019745	A_55_P2393543	0.738095	0.017
1536	9	A_30_P01019745	A_51_P201308	-0.714286	0.0209
1537	10	A_30_P01019745	A_51_P213476	0.857143	0.0035
1538	11	A_30_P01019745	A_51_P336599	-0.785714	0.0094
1539	12	A_30_P01019745	A_51_P349888	-0.833333	0.0062
1540	13	A_30_P01019745	A_51_P435629	-0.785714	0.0121
1541	14	A_30_P01019745	A_51_P447189	0.928571	0.0006
1542	15	A_30_P01019745	A_52_P217796	0.809524	0.0082
1543	16	A_30_P01019745	A_52_P349694	0.714286	0.0209
1544	17	A_30_P01019745	A_52_P425839	-0.785714	0.0102
1545	18	A_30_P01019745	A_52_P527260	0.714286	0.0211
1546	19	A_30_P01019745	A_52_P591310	-0.785714	0.0108
1547	20	A_30_P01019745	A_52_P598835	0.809524	0.0091
1548	21	A_30_P01019745	A_52_P61520	-0.738095	0.018
1549	22	A_30_P01019745	A_52_P62444	0.833333	0.0047
1550	23	A_30_P01019745	A_55_P1960441	0.880952	0.0018
1551	24	A_30_P01019745	A_55_P1961883	0.714286	0.0197
1552	25	A_30_P01019745	A_55_P1962364	-0.714286	0.0223
1553	26	A_30_P01019745	A_55_P1963011	-0.809524	0.0078
1554	27	A_30_P01019745	A_55_P1964252	-0.714286	0.0223
1555	28	A_30_P01019745	A_55_P1968340	0.833333	0.0058
1556	29	A_30_P01019745	A_55_P1985925	0.809524	0.0083
1557	30	A_30_P01019745	A_55_P1997135	0.809524	0.0079
1558	31	A_30_P01019745	A_55_P2014511	0.738095	0.0184
1559	32	A_30_P01019745	A_55_P2018407	0.952381	0.0002
1560	33	A_30_P01019745	A_55_P2025538	-0.904762	0.0008
1561	34	A_30_P01019745	A_55_P2040485	-0.880952	0.0025
1562	35	A_30_P01019745	A_55_P2043277	-0.738095	0.0147
1563	36	A_30_P01019745	A_55_P2054703	0.809524	0.0067
1564	37	A_30_P01019745	A_55_P2059701	-0.904762	0.0016
1565	38	A_30_P01019745	A_55_P2084691	-0.761905	0.0136
1566	39	A_30_P01019745	A_55_P2103452	-0.809524	0.008
1567	40	A_30_P01019745	A_55_P2115300	0.761905	0.0119
1568	41	A_30_P01019745	A_55_P2131481	0.714286	0.0216
1569	42	A_30_P01019745	A_55_P2133007	0.880952	0.0019
1570	43	A_30_P01019745	A_55_P2143499	-0.857143	0.0043
1571	44	A_30_P01019745	A_55_P2148931	-0.761905	0.0141
1572	45	A_30_P01019745	A_55_P2166238	0.761905	0.013
1573	46	A_30_P01019745	A_55_P2179925	0.761905	0.0144
1574	47	A_30_P01019745	A_55_P2183508	-0.714286	0.0243
1575	48	A_30_P01019745	A_55_P2273929	0.761905	0.0147
1576	49	A_30_P01019745	A_55_P2284273	0.904762	0.0011
1577	50	A_30_P01019745	A_55_P2311591	-0.714286	0.0221
1578	51	A_30_P01019745	A_55_P2330069	0.97619	0
1579	52	A_30_P01019745	A_55_P2339399	0.738095	0.016
1580	53	A_30_P01019745	A_55_P2341667	0.928571	0.0006
1581	54	A_30_P01019745	A_55_P2380900	0.738095	0.02
1582	55	A_30_P01019745	A_55_P2416494	0.809524	0.0063
1583	56	A_30_P01019745	A_66_P138976	0.952381	0.0002
1584	1	A_30_P01019875	A_55_P2062171	-0.761905	0.0129
1585	2	A_30_P01019875	A_51_P516198	0.761905	0.0157
1586	3	A_30_P01019875	A_52_P468068	0.809524	0.0061
1587	4	A_30_P01019875	A_52_P628915	0.952381	0.0002
1588	5	A_30_P01019875	A_55_P1957729	0.714286	0.0235
1589	6	A_30_P01019875	A_55_P1960108	0.714286	0.0226
1590	7	A_30_P01019875	A_55_P1960441	0.738095	0.019
1591	8	A_30_P01019875	A_55_P2006430	0.785714	0.0105
1592	9	A_30_P01019875	A_55_P2023285	0.761905	0.0138
1593	10	A_30_P01019875	A_55_P2029732	0.714286	0.0248
1594	11	A_30_P01019875	A_55_P2038467	0.761905	0.0138
1595	12	A_30_P01019875	A_55_P2057912	0.785714	0.0101
1596	13	A_30_P01019875	A_55_P2114779	0.714286	0.0233
1597	14	A_30_P01019875	A_55_P2115300	0.738095	0.0198
1598	15	A_30_P01019875	A_55_P2131283	0.833333	0.0051
1599	16	A_30_P01019875	A_55_P2132268	0.809524	0.0074
1600	17	A_30_P01019875	A_55_P2353079	0.714286	0.0238
1601	18	A_30_P01019875	A_55_P2353457	0.833333	0.0068
1602	19	A_30_P01019875	A_55_P2416837	0.714286	0.0216
1603	1	A_30_P01019966	A_51_P239654	-0.714286	0.0225
1604	2	A_30_P01019966	A_52_P311148	-0.952381	0
1605	3	A_30_P01019966	A_55_P1953003	-0.857143	0.0042
1606	4	A_30_P01019966	A_55_P1993168	0.857143	0.0036
1607	5	A_30_P01019966	A_55_P2019683	-0.738095	0.0205
1608	6	A_30_P01019966	A_55_P2045871	-0.714286	0.0233
1609	7	A_30_P01019966	A_55_P2052939	-0.928571	0.0005
1610	8	A_30_P01019966	A_55_P2054027	-0.904762	0.0007
1611	9	A_30_P01019966	A_55_P2111790	-0.857143	0.0034
1612	10	A_30_P01019966	A_55_P2119683	0.809524	0.0074
1613	11	A_30_P01019966	A_55_P2136880	-0.857143	0.0041
1614	12	A_30_P01019966	A_55_P2138933	-0.738095	0.0189
1615	13	A_30_P01019966	A_55_P2393543	0.714286	0.022
1616	14	A_30_P01019966	A_51_P161636	0.785714	0.0105
1617	15	A_30_P01019966	A_51_P173678	-0.809524	0.008
1618	16	A_30_P01019966	A_51_P213476	0.928571	0.0004
1619	17	A_30_P01019966	A_51_P447189	0.880952	0.0019
1620	18	A_30_P01019966	A_52_P217796	0.761905	0.0139
1621	19	A_30_P01019966	A_52_P258557	-0.738095	0.0187
1622	20	A_30_P01019966	A_52_P425839	-0.785714	0.0101
1623	21	A_30_P01019966	A_52_P527260	0.738095	0.019
1624	22	A_30_P01019966	A_52_P618009	0.928571	0.0004
1625	23	A_30_P01019966	A_52_P62444	0.97619	0.0001
1626	24	A_30_P01019966	A_52_P63855	0.809524	0.0071
1627	25	A_30_P01019966	A_52_P663413	0.785714	0.0102
1628	26	A_30_P01019966	A_52_P68087	0.714286	0.0232
1629	27	A_30_P01019966	A_55_P1952379	-0.738095	0.02
1630	28	A_30_P01019966	A_55_P1960441	0.809524	0.0078
1631	29	A_30_P01019966	A_55_P1962364	-0.833333	0.0053
1632	30	A_30_P01019966	A_55_P1968340	0.809524	0.0071
1633	31	A_30_P01019966	A_55_P1985925	0.952381	0.0004
1634	32	A_30_P01019966	A_55_P1990200	-0.761905	0.0133
1635	33	A_30_P01019966	A_55_P2015074	-0.714286	0.0242
1636	34	A_30_P01019966	A_55_P2018407	0.904762	0.0013
1637	35	A_30_P01019966	A_55_P2040485	-0.809524	0.006
1638	36	A_30_P01019966	A_55_P2095663	0.857143	0.0041
1639	37	A_30_P01019966	A_55_P2131481	0.738095	0.019
1640	38	A_30_P01019966	A_55_P2133007	0.809524	0.0079
1641	39	A_30_P01019966	A_55_P2142453	0.738095	0.0192
1642	40	A_30_P01019966	A_55_P2143499	-0.714286	0.0204
1643	41	A_30_P01019966	A_55_P2269819	-0.833333	0.0038
1644	42	A_30_P01019966	A_55_P2273929	0.904762	0.0009
1645	43	A_30_P01019966	A_55_P2284273	0.833333	0.0068
1646	44	A_30_P01019966	A_55_P2330069	0.857143	0.0033
1647	45	A_30_P01019966	A_55_P2339399	0.714286	0.0238
1648	46	A_30_P01019966	A_55_P2341667	0.880952	0.0029
1649	47	A_30_P01019966	A_55_P2346659	-0.785714	0.0108
1650	48	A_30_P01019966	A_55_P2380900	0.952381	0.0001
1651	49	A_30_P01019966	A_55_P2423518	0.833333	0.0047
1652	50	A_30_P01019966	A_66_P114229	0.714286	0.0237
1653	51	A_30_P01019966	A_66_P134297	0.809524	0.0088
1654	52	A_30_P01019966	A_66_P138976	0.833333	0.0054
1655	1	A_30_P01020056	A_51_P239654	0.761905	0.015
1656	2	A_30_P01020056	A_52_P128134	0.761905	0.0151
1657	3	A_30_P01020056	A_52_P311148	0.809524	0.0082
1658	4	A_30_P01020056	A_52_P31543	0.738095	0.0172
1659	5	A_30_P01020056	A_52_P326664	-0.785714	0.012
1660	6	A_30_P01020056	A_55_P1993168	-0.880952	0.0028
1661	7	A_30_P01020056	A_55_P2029289	-0.857143	0.0028
1662	8	A_30_P01020056	A_55_P2111790	0.904762	0.001
1663	9	A_30_P01020056	A_55_P2113051	0.738095	0.0191
1664	10	A_30_P01020056	A_55_P2119683	-0.857143	0.004
1665	11	A_30_P01020056	A_55_P2136880	0.738095	0.0192
1666	12	A_30_P01020056	A_55_P2393543	-0.761905	0.0145
1667	13	A_30_P01020056	A_51_P173678	0.952381	0
1668	14	A_30_P01020056	A_51_P201308	0.857143	0.0035
1669	15	A_30_P01020056	A_51_P213476	-0.714286	0.0221
1670	16	A_30_P01020056	A_51_P278653	0.761905	0.0147
1671	17	A_30_P01020056	A_51_P349888	0.714286	0.0212
1672	18	A_30_P01020056	A_51_P372743	0.928571	0.0004
1673	19	A_30_P01020056	A_51_P398089	0.904762	0.0015
1674	20	A_30_P01020056	A_51_P447189	-0.809524	0.0099
1675	21	A_30_P01020056	A_51_P475816	0.738095	0.0176
1676	22	A_30_P01020056	A_51_P497768	0.714286	0.0217
1677	23	A_30_P01020056	A_52_P258557	0.952381	0
1678	24	A_30_P01020056	A_52_P425839	0.928571	0.0005
1679	25	A_30_P01020056	A_52_P482897	-0.785714	0.0113
1680	26	A_30_P01020056	A_52_P62444	-0.761905	0.014
1681	27	A_30_P01020056	A_55_P1952284	0.833333	0.0047
1682	28	A_30_P01020056	A_55_P1952379	0.880952	0.0025
1683	29	A_30_P01020056	A_55_P1960441	-0.714286	0.0239
1684	30	A_30_P01020056	A_55_P1962364	0.880952	0.0027
1685	31	A_30_P01020056	A_55_P1963011	0.761905	0.0146
1686	32	A_30_P01020056	A_55_P1968340	-0.785714	0.0122
1687	33	A_30_P01020056	A_55_P1976972	0.714286	0.0224
1688	34	A_30_P01020056	A_55_P1977299	0.785714	0.0107
1689	35	A_30_P01020056	A_55_P1990200	0.833333	0.0047
1690	36	A_30_P01020056	A_55_P1993876	0.714286	0.0226
1691	37	A_30_P01020056	A_55_P1999756	0.785714	0.0113
1692	38	A_30_P01020056	A_55_P2003048	0.785714	0.0105
1693	39	A_30_P01020056	A_55_P2014511	-0.714286	0.0228
1694	40	A_30_P01020056	A_55_P2015074	0.952381	0.0003
1695	41	A_30_P01020056	A_55_P2018407	-0.833333	0.0058
1696	42	A_30_P01020056	A_55_P2040485	0.857143	0.004
1697	43	A_30_P01020056	A_55_P2043277	0.904762	0.0019
1698	44	A_30_P01020056	A_55_P2059701	0.785714	0.0117
1699	45	A_30_P01020056	A_55_P2079922	0.714286	0.0217
1700	46	A_30_P01020056	A_55_P2086323	0.785714	0.0115
1701	47	A_30_P01020056	A_55_P2103452	0.785714	0.0088
1702	48	A_30_P01020056	A_55_P2105416	0.714286	0.0193
1703	49	A_30_P01020056	A_55_P2131481	-0.857143	0.0045
1704	50	A_30_P01020056	A_55_P2133007	-0.761905	0.0147
1705	51	A_30_P01020056	A_55_P2143499	0.809524	0.0069
1706	52	A_30_P01020056	A_55_P2148931	0.714286	0.0215
1707	53	A_30_P01020056	A_55_P2176953	0.880952	0.0023
1708	54	A_30_P01020056	A_55_P2195187	0.761905	0.012
1709	55	A_30_P01020056	A_55_P2266285	-0.761905	0.0145
1710	56	A_30_P01020056	A_55_P2269819	0.904762	0.0008
1711	57	A_30_P01020056	A_55_P2284273	-0.738095	0.0202
1712	58	A_30_P01020056	A_55_P2311591	0.880952	0.0027
1713	59	A_30_P01020056	A_55_P2330069	-0.785714	0.0101
1714	60	A_30_P01020056	A_55_P2341667	-0.809524	0.0058
1715	61	A_30_P01020056	A_55_P2346659	0.809524	0.0075
1716	62	A_30_P01020056	A_55_P2407192	0.833333	0.0055
1717	63	A_30_P01020056	A_55_P2423518	-0.809524	0.0084
1718	64	A_30_P01020056	A_66_P138976	-0.761905	0.0124
1719	1	A_30_P01020129	A_51_P153683	-0.785714	0.0105
1720	2	A_30_P01020129	A_51_P198675	-0.785714	0.0109
1721	3	A_30_P01020129	A_51_P288341	-0.880952	0.0027
1722	4	A_30_P01020129	A_55_P1977431	-0.833333	0.0045
1723	5	A_30_P01020129	A_55_P1993168	-0.738095	0.0167
1724	6	A_30_P01020129	A_55_P1998086	-0.880952	0.0019
1725	7	A_30_P01020129	A_55_P2153461	-0.761905	0.0145
1726	8	A_30_P01020129	A_51_P113195	0.738095	0.018
1727	9	A_30_P01020129	A_51_P114817	0.928571	0.0005
1728	10	A_30_P01020129	A_51_P149267	0.857143	0.0032
1729	11	A_30_P01020129	A_51_P185660	0.714286	0.0222
1730	12	A_30_P01020129	A_51_P189082	0.928571	0.0005
1731	13	A_30_P01020129	A_51_P193813	0.833333	0.006
1732	14	A_30_P01020129	A_51_P201308	0.761905	0.0139
1733	15	A_30_P01020129	A_51_P336599	0.809524	0.0085
1734	16	A_30_P01020129	A_51_P349888	0.857143	0.0029
1735	17	A_30_P01020129	A_51_P376445	0.833333	0.0057
1736	18	A_30_P01020129	A_51_P379552	0.904762	0.0009
1737	19	A_30_P01020129	A_51_P414208	0.761905	0.0168
1738	20	A_30_P01020129	A_51_P435629	0.809524	0.0075
1739	21	A_30_P01020129	A_51_P462271	0.761905	0.0153
1740	22	A_30_P01020129	A_51_P475816	0.928571	0.0005
1741	23	A_30_P01020129	A_51_P497768	0.952381	0.0002
1742	24	A_30_P01020129	A_52_P1124229	0.714286	0.0235
1743	25	A_30_P01020129	A_52_P219089	0.761905	0.0136
1744	26	A_30_P01020129	A_52_P385736	0.714286	0.0212
1745	27	A_30_P01020129	A_52_P425839	0.738095	0.0178
1746	28	A_30_P01020129	A_52_P591310	0.833333	0.0039
1747	29	A_30_P01020129	A_52_P61520	0.904762	0.0012
1748	30	A_30_P01020129	A_55_P1952284	0.880952	0.0029
1749	31	A_30_P01020129	A_55_P1952379	0.785714	0.0096
1750	32	A_30_P01020129	A_55_P1953107	0.809524	0.0074
1751	33	A_30_P01020129	A_55_P1955084	0.761905	0.0127
1752	34	A_30_P01020129	A_55_P1959650	0.809524	0.0086
1753	35	A_30_P01020129	A_55_P1960896	0.785714	0.0097
1754	36	A_30_P01020129	A_55_P1963011	0.904762	0.0006
1755	37	A_30_P01020129	A_55_P1964252	0.785714	0.0102
1756	38	A_30_P01020129	A_55_P1966070	0.785714	0.0111
1757	39	A_30_P01020129	A_55_P1968099	0.928571	0.0005
1758	40	A_30_P01020129	A_55_P1970279	0.904762	0.001
1759	41	A_30_P01020129	A_55_P1976589	0.809524	0.0077
1760	42	A_30_P01020129	A_55_P1977299	0.880952	0.0025
1761	43	A_30_P01020129	A_55_P1981030	0.904762	0.0014
1762	44	A_30_P01020129	A_55_P1987554	0.880952	0.0029
1763	45	A_30_P01020129	A_55_P2002787	0.857143	0.0029
1764	46	A_30_P01020129	A_55_P2008507	0.738095	0.0189
1765	47	A_30_P01020129	A_55_P2009483	0.833333	0.0056
1766	48	A_30_P01020129	A_55_P2009767	0.809524	0.0078
1767	49	A_30_P01020129	A_55_P2011096	0.809524	0.0061
1768	50	A_30_P01020129	A_55_P2012281	0.714286	0.0247
1769	51	A_30_P01020129	A_55_P2012702	0.833333	0.0042
1770	52	A_30_P01020129	A_55_P2015541	0.785714	0.0107
1771	53	A_30_P01020129	A_55_P2017955	0.880952	0.0021
1772	54	A_30_P01020129	A_55_P2023021	0.928571	0.0011
1773	55	A_30_P01020129	A_55_P2025538	0.714286	0.0195
1774	56	A_30_P01020129	A_55_P2030465	0.785714	0.0087
1775	57	A_30_P01020129	A_55_P2030612	0.928571	0.0009
1776	58	A_30_P01020129	A_55_P2040485	0.714286	0.0246
1777	59	A_30_P01020129	A_55_P2040594	0.904762	0.001
1778	60	A_30_P01020129	A_55_P2048134	0.714286	0.0229
1779	61	A_30_P01020129	A_55_P2052655	0.714286	0.0222
1780	62	A_30_P01020129	A_55_P2058761	0.904762	0.0013
1781	63	A_30_P01020129	A_55_P2059701	0.785714	0.0101
1782	64	A_30_P01020129	A_55_P2064702	0.857143	0.0032
1783	65	A_30_P01020129	A_55_P2065815	0.904762	0.0013
1784	66	A_30_P01020129	A_55_P2067321	0.928571	0.0003
1785	67	A_30_P01020129	A_55_P2074425	0.785714	0.0102
1786	68	A_30_P01020129	A_55_P2076215	0.880952	0.0027
1787	69	A_30_P01020129	A_55_P2076219	0.857143	0.0028
1788	70	A_30_P01020129	A_55_P2079475	0.761905	0.0121
1789	71	A_30_P01020129	A_55_P2079669	0.785714	0.0084
1790	72	A_30_P01020129	A_55_P2079922	0.761905	0.0122
1791	73	A_30_P01020129	A_55_P2080587	0.904762	0.0013
1792	74	A_30_P01020129	A_55_P2084691	0.809524	0.0078
1793	75	A_30_P01020129	A_55_P2085651	0.809524	0.0083
1794	76	A_30_P01020129	A_55_P2091297	0.761905	0.0165
1795	77	A_30_P01020129	A_55_P2096455	0.833333	0.0052
1796	78	A_30_P01020129	A_55_P2103452	0.738095	0.0178
1797	79	A_30_P01020129	A_55_P2105296	0.904762	0.0009
1798	80	A_30_P01020129	A_55_P2107457	0.714286	0.0226
1799	81	A_30_P01020129	A_55_P2109312	0.761905	0.0137
1800	82	A_30_P01020129	A_55_P2113758	0.761905	0.0159
1801	83	A_30_P01020129	A_55_P2114059	0.833333	0.0047
1802	84	A_30_P01020129	A_55_P2120968	0.785714	0.0103
1803	85	A_30_P01020129	A_55_P2124923	0.833333	0.0052
1804	86	A_30_P01020129	A_55_P2128144	0.761905	0.0122
1805	87	A_30_P01020129	A_55_P2128582	0.880952	0.0021
1806	88	A_30_P01020129	A_55_P2134715	0.714286	0.0226
1807	89	A_30_P01020129	A_55_P2135178	0.857143	0.0024
1808	90	A_30_P01020129	A_55_P2135895	0.857143	0.0023
1809	91	A_30_P01020129	A_55_P2139216	0.904762	0.0009
1810	92	A_30_P01020129	A_55_P2141645	0.833333	0.0053
1811	93	A_30_P01020129	A_55_P2143499	0.809524	0.0076
1812	94	A_30_P01020129	A_55_P2155116	0.738095	0.0206
1813	95	A_30_P01020129	A_55_P2159315	0.880952	0.0024
1814	96	A_30_P01020129	A_55_P2163383	0.857143	0.0034
1815	97	A_30_P01020129	A_55_P2168286	0.809524	0.0071
1816	98	A_30_P01020129	A_55_P2183508	0.785714	0.0087
1817	99	A_30_P01020129	A_55_P2185410	0.761905	0.0135
1818	100	A_30_P01020129	A_55_P2244360	0.761905	0.0154
1819	101	A_30_P01020129	A_55_P2330435	0.880952	0.0022
1820	102	A_30_P01020129	A_55_P2350710	0.904762	0.0009
1821	103	A_30_P01020129	A_55_P2361932	0.738095	0.0189
1822	104	A_30_P01020129	A_55_P2362970	0.761905	0.0139
1823	105	A_30_P01020129	A_55_P2366358	0.738095	0.0191
1824	106	A_30_P01020129	A_55_P2371879	0.857143	0.003
1825	107	A_30_P01020129	A_55_P2427150	0.880952	0.0025
1826	108	A_30_P01020129	A_66_P101132	0.833333	0.0049
1827	109	A_30_P01020129	A_66_P128120	0.880952	0.0022
1828	110	A_30_P01020129	A_66_P130067	0.761905	0.0121
1829	111	A_30_P01020129	A_66_P135124	0.928571	0.0005
1830	112	A_30_P01020129	A_66_P139883	0.904762	0.0012
1831	1	A_30_P01020159	A_51_P258768	-0.833333	0.0068
1832	2	A_30_P01020159	A_55_P2054027	-0.714286	0.0245
1833	3	A_30_P01020159	A_55_P2369048	-0.714286	0.0231
1834	4	A_30_P01020159	A_51_P137452	0.904762	0.0013
1835	5	A_30_P01020159	A_51_P185660	0.785714	0.0115
1836	6	A_30_P01020159	A_51_P339564	0.761905	0.0131
1837	7	A_30_P01020159	A_51_P366680	0.785714	0.0105
1838	8	A_30_P01020159	A_51_P414208	0.809524	0.0073
1839	9	A_30_P01020159	A_51_P462271	0.738095	0.0175
1840	10	A_30_P01020159	A_51_P516198	0.809524	0.0076
1841	11	A_30_P01020159	A_52_P188856	0.952381	0.0002
1842	12	A_30_P01020159	A_52_P219089	0.761905	0.0146
1843	13	A_30_P01020159	A_52_P628915	0.714286	0.0219
1844	14	A_30_P01020159	A_55_P1955084	0.714286	0.0205
1845	15	A_30_P01020159	A_55_P1957498	0.785714	0.0096
1846	16	A_30_P01020159	A_55_P1959650	0.833333	0.0044
1847	17	A_30_P01020159	A_55_P1960108	0.904762	0.0014
1848	18	A_30_P01020159	A_55_P1966070	0.833333	0.0059
1849	19	A_30_P01020159	A_55_P1979126	0.761905	0.0136
1850	20	A_30_P01020159	A_55_P1987117	0.738095	0.0188
1851	21	A_30_P01020159	A_55_P2006400	0.690476	0.0238
1852	22	A_30_P01020159	A_55_P2006430	0.857143	0.004
1853	23	A_30_P01020159	A_55_P2008141	0.809524	0.0077
1854	24	A_30_P01020159	A_55_P2008403	0.714286	0.0236
1855	25	A_30_P01020159	A_55_P2012281	0.857143	0.0027
1856	26	A_30_P01020159	A_55_P2013470	0.714286	0.0225
1857	27	A_30_P01020159	A_55_P2015249	0.904762	0.0018
1858	28	A_30_P01020159	A_55_P2023285	0.714286	0.0243
1859	29	A_30_P01020159	A_55_P2029732	0.928571	0.0004
1860	30	A_30_P01020159	A_55_P2032014	0.785714	0.0108
1861	31	A_30_P01020159	A_55_P2038467	0.714286	0.0242
1862	32	A_30_P01020159	A_55_P2045750	0.904762	0.0008
1863	33	A_30_P01020159	A_55_P2064361	0.809524	0.0061
1864	34	A_30_P01020159	A_55_P2074425	0.714286	0.0217
1865	35	A_30_P01020159	A_55_P2085651	0.714286	0.0235
1866	36	A_30_P01020159	A_55_P2101108	0.738095	0.0171
1867	37	A_30_P01020159	A_55_P2106798	0.761905	0.013
1868	38	A_30_P01020159	A_55_P2107457	0.738095	0.0175
1869	39	A_30_P01020159	A_55_P2113758	0.785714	0.0118
1870	40	A_30_P01020159	A_55_P2114779	0.880952	0.0021
1871	41	A_30_P01020159	A_55_P2128203	0.833333	0.0047
1872	42	A_30_P01020159	A_55_P2131283	0.714286	0.0201
1873	43	A_30_P01020159	A_55_P2132268	0.809524	0.0089
1874	44	A_30_P01020159	A_55_P2137628	0.809524	0.0076
1875	45	A_30_P01020159	A_55_P2142453	0.714286	0.0243
1876	46	A_30_P01020159	A_55_P2143120	0.738095	0.0178
1877	47	A_30_P01020159	A_55_P2168286	0.761905	0.0149
1878	48	A_30_P01020159	A_55_P2185410	0.809524	0.0073
1879	49	A_30_P01020159	A_55_P2353457	0.714286	0.0218
1880	50	A_30_P01020159	A_55_P2416837	0.880952	0.0024
1881	51	A_30_P01020159	A_66_P130067	0.738095	0.0185
1882	1	A_30_P01020188	A_51_P258768	-0.952381	0.0003
1883	2	A_30_P01020188	A_55_P1988043	-0.738095	0.0192
1884	3	A_30_P01020188	A_51_P185660	0.857143	0.0036
1885	4	A_30_P01020188	A_51_P316199	0.880952	0.0023
1886	5	A_30_P01020188	A_51_P328631	0.857143	0.004
1887	6	A_30_P01020188	A_51_P339564	0.809524	0.0077
1888	7	A_30_P01020188	A_51_P366680	0.785714	0.0086
1889	8	A_30_P01020188	A_51_P414208	0.785714	0.0118
1890	9	A_30_P01020188	A_51_P435817	0.857143	0.0038
1891	10	A_30_P01020188	A_51_P462271	0.833333	0.0051
1892	11	A_30_P01020188	A_51_P516198	0.761905	0.0138
1893	12	A_30_P01020188	A_52_P188856	0.738095	0.0193
1894	13	A_30_P01020188	A_52_P628411	0.785714	0.0103
1895	14	A_30_P01020188	A_55_P1959650	0.761905	0.014
1896	15	A_30_P01020188	A_55_P1964252	0.714286	0.0237
1897	16	A_30_P01020188	A_55_P1966070	0.714286	0.022
1898	17	A_30_P01020188	A_55_P1968099	0.738095	0.0185
1899	18	A_30_P01020188	A_55_P1979126	0.833333	0.0051
1900	19	A_30_P01020188	A_55_P1987554	0.761905	0.0124
1901	20	A_30_P01020188	A_55_P2008507	0.952381	0.0002
1902	21	A_30_P01020188	A_55_P2009483	0.785714	0.0101
1903	22	A_30_P01020188	A_55_P2011096	0.714286	0.0222
1904	23	A_30_P01020188	A_55_P2012281	0.738095	0.0176
1905	24	A_30_P01020188	A_55_P2013470	1	0
1906	25	A_30_P01020188	A_55_P2023021	0.738095	0.0175
1907	26	A_30_P01020188	A_55_P2029732	0.738095	0.0164
1908	27	A_30_P01020188	A_55_P2030612	0.738095	0.018
1909	28	A_30_P01020188	A_55_P2032014	0.761905	0.0134
1910	29	A_30_P01020188	A_55_P2040594	0.809524	0.0079
1911	30	A_30_P01020188	A_55_P2074425	0.928571	0.0006
1912	31	A_30_P01020188	A_55_P2076219	0.809524	0.0066
1913	32	A_30_P01020188	A_55_P2080587	0.809524	0.0069
1914	33	A_30_P01020188	A_55_P2085651	0.761905	0.0135
1915	34	A_30_P01020188	A_55_P2098494	0.761905	0.0158
1916	35	A_30_P01020188	A_55_P2105673	0.97619	0
1917	36	A_30_P01020188	A_55_P2106798	0.904762	0.0008
1918	37	A_30_P01020188	A_55_P2118614	0.714286	0.0204
1919	38	A_30_P01020188	A_55_P2120968	0.714286	0.0232
1920	39	A_30_P01020188	A_55_P2127482	0.761905	0.0138
1921	40	A_30_P01020188	A_55_P2128203	0.952381	0.0002
1922	41	A_30_P01020188	A_55_P2134715	0.761905	0.0133
1923	42	A_30_P01020188	A_55_P2141645	0.809524	0.0083
1924	43	A_30_P01020188	A_55_P2142321	0.761905	0.0136
1925	44	A_30_P01020188	A_55_P2159315	0.880952	0.0024
1926	45	A_30_P01020188	A_55_P2168286	0.880952	0.0022
1927	46	A_30_P01020188	A_55_P2178036	0.761905	0.0159
1928	47	A_30_P01020188	A_55_P2412847	0.880952	0.0017
1929	48	A_30_P01020188	A_66_P100420	0.833333	0.0053
1930	49	A_30_P01020188	A_66_P123666	0.738095	0.0183
1931	50	A_30_P01020188	A_66_P126640	0.880952	0.0023
1932	51	A_30_P01020188	A_66_P128120	0.785714	0.0122
1933	52	A_30_P01020188	A_66_P130067	0.738095	0.0191
1934	1	A_30_P01020338	A_55_P1998086	-0.761905	0.0126
1935	2	A_30_P01020338	A_55_P2091274	-0.809524	0.0088
1936	3	A_30_P01020338	A_51_P113195	0.761905	0.0144
1937	4	A_30_P01020338	A_51_P269404	0.761905	0.0129
1938	5	A_30_P01020338	A_51_P435844	0.761905	0.0126
1939	6	A_30_P01020338	A_52_P649817	0.928571	0.0008
1940	7	A_30_P01020338	A_55_P1965248	0.785714	0.0108
1941	8	A_30_P01020338	A_55_P1968099	0.809524	0.0071
1942	9	A_30_P01020338	A_55_P1970279	0.857143	0.0036
1943	10	A_30_P01020338	A_55_P1973588	0.880952	0.0028
1944	11	A_30_P01020338	A_55_P1976589	0.809524	0.0079
1945	12	A_30_P01020338	A_55_P1986169	0.809524	0.0078
1946	13	A_30_P01020338	A_55_P1986571	0.809524	0.0073
1947	14	A_30_P01020338	A_55_P2017955	0.761905	0.0134
1948	15	A_30_P01020338	A_55_P2048134	0.833333	0.0047
1949	16	A_30_P01020338	A_55_P2052655	0.785714	0.0109
1950	17	A_30_P01020338	A_55_P2058761	0.857143	0.0034
1951	18	A_30_P01020338	A_55_P2059080	0.761905	0.0132
1952	19	A_30_P01020338	A_55_P2071112	0.833333	0.0042
1953	20	A_30_P01020338	A_55_P2073930	0.785714	0.009
1954	21	A_30_P01020338	A_55_P2076215	0.833333	0.0053
1955	22	A_30_P01020338	A_55_P2085651	0.690476	0.0248
1956	23	A_30_P01020338	A_55_P2105296	0.880952	0.0018
1957	24	A_30_P01020338	A_55_P2106798	0.714286	0.0236
1958	25	A_30_P01020338	A_55_P2128144	0.833333	0.0039
1959	26	A_30_P01020338	A_55_P2128582	0.738095	0.0172
1960	27	A_30_P01020338	A_55_P2135178	0.833333	0.0042
1961	28	A_30_P01020338	A_55_P2142321	0.880952	0.0019
1962	29	A_30_P01020338	A_55_P2155116	0.714286	0.0237
1963	30	A_30_P01020338	A_55_P2155859	0.857143	0.0033
1964	31	A_30_P01020338	A_55_P2178036	0.833333	0.0047
1965	32	A_30_P01020338	A_55_P2244360	0.880952	0.0023
1966	33	A_30_P01020338	A_55_P2330435	0.714286	0.0211
1967	34	A_30_P01020338	A_66_P124254	0.785714	0.0102
1968	35	A_30_P01020338	A_66_P139883	0.738095	0.0196
1969	1	A_30_P01020352	A_51_P153683	-0.857143	0.0048
1970	2	A_30_P01020352	A_51_P198675	-0.809524	0.0075
1971	3	A_30_P01020352	A_51_P288341	-0.904762	0.0009
1972	4	A_30_P01020352	A_51_P428483	-0.761905	0.0142
1973	5	A_30_P01020352	A_55_P1977431	-0.809524	0.0064
1974	6	A_30_P01020352	A_55_P1998086	-0.738095	0.0194
1975	7	A_30_P01020352	A_55_P2037081	-0.833333	0.005
1976	8	A_30_P01020352	A_55_P2042813	-0.809524	0.0086
1977	9	A_30_P01020352	A_55_P2153461	-0.833333	0.0059
1978	10	A_30_P01020352	A_51_P113195	0.738095	0.0175
1979	11	A_30_P01020352	A_51_P114817	0.738095	0.0164
1980	12	A_30_P01020352	A_51_P131119	0.904762	0.0018
1981	13	A_30_P01020352	A_51_P149267	0.738095	0.0171
1982	14	A_30_P01020352	A_51_P160581	0.761905	0.0138
1983	15	A_30_P01020352	A_51_P376445	0.928571	0.0003
1984	16	A_30_P01020352	A_51_P414208	0.738095	0.0181
1985	17	A_30_P01020352	A_51_P435844	0.714286	0.0219
1986	18	A_30_P01020352	A_51_P475816	0.761905	0.017
1987	19	A_30_P01020352	A_51_P505967	0.785714	0.0112
1988	20	A_30_P01020352	A_52_P1124229	0.785714	0.0106
1989	21	A_30_P01020352	A_52_P125485	0.809524	0.0077
1990	22	A_30_P01020352	A_52_P219089	0.809524	0.0071
1991	23	A_30_P01020352	A_52_P322474	0.785714	0.0119
1992	24	A_30_P01020352	A_52_P576188	0.785714	0.0118
1993	25	A_30_P01020352	A_52_P94021	0.714286	0.0204
1994	26	A_30_P01020352	A_55_P1953107	0.761905	0.0149
1995	27	A_30_P01020352	A_55_P1955084	0.904762	0.0017
1996	28	A_30_P01020352	A_55_P1959650	0.833333	0.0065
1997	29	A_30_P01020352	A_55_P1960108	0.785714	0.0096
1998	30	A_30_P01020352	A_55_P1966070	0.857143	0.0032
[truncated: 9,441 more rows]

## Sheet: SPRET_Wk4
Table S4. Correlations between lncRNA and coding RNA expression in BALB/c and SPRET/EiJ mammary tissues after LDIR exposure.
Correlation #	Coding RNA #	Linc RNA	Coding RNA	correlation	p-value				Unique Linc RNA
1	1	A_30_P01017436	A_51_P212473	0.761905	0.0149				A_30_P01017436
2	2	A_30_P01017436	A_51_P426994	0.952381	0.0003				A_30_P01017479
3	3	A_30_P01017436	A_51_P493649	0.857143	0.003				A_30_P01017551
4	4	A_30_P01017436	A_52_P148289	0.761905	0.0131				A_30_P01017600
5	5	A_30_P01017436	A_52_P211418	0.809524	0.0077				A_30_P01017662
6	6	A_30_P01017436	A_52_P299627	0.714286	0.0217				A_30_P01017672
7	7	A_30_P01017436	A_52_P73498	0.761905	0.0142				A_30_P01017727
8	8	A_30_P01017436	A_52_P819011	0.880952	0.002				A_30_P01017863
9	9	A_30_P01017436	A_55_P1952998	0.714286	0.0224				A_30_P01017901
10	10	A_30_P01017436	A_55_P1981035	0.833333	0.0048				A_30_P01018008
11	11	A_30_P01017436	A_55_P2003931	0.761905	0.0144				A_30_P01018054
12	12	A_30_P01017436	A_55_P2082489	0.904762	0.0012				A_30_P01018126
13	13	A_30_P01017436	A_55_P2096797	0.714286	0.0243				A_30_P01018211
14	14	A_30_P01017436	A_55_P2097264	0.785714	0.0115				A_30_P01018223
15	15	A_30_P01017436	A_55_P2143622	0.738095	0.0171				A_30_P01018379
16	16	A_30_P01017436	A_55_P2144586	0.857143	0.003				A_30_P01018391
17	17	A_30_P01017436	A_55_P2150349	0.761905	0.0132				A_30_P01018561
18	18	A_30_P01017436	A_55_P2167249	0.761905	0.0142				A_30_P01018797
19	19	A_30_P01017436	A_55_P2185068	0.714286	0.0246				A_30_P01018846
20	20	A_30_P01017436	A_55_P2295282	-0.809524	0.0071				A_30_P01018968
21	21	A_30_P01017436	A_66_P133153	0.880952	0.0022				A_30_P01019012
22	22	A_30_P01017436	A_52_P770640	-0.761905	0.0148				A_30_P01019252
23	23	A_30_P01017436	A_55_P1953968	0.714286	0.0231				A_30_P01019400
24	24	A_30_P01017436	A_55_P1980826	0.952381	0.0001				A_30_P01019434
25	25	A_30_P01017436	A_55_P2042788	-0.761905	0.0159				A_30_P01019525
26	26	A_30_P01017436	A_55_P2307713	-0.761905	0.0143				A_30_P01019550
27	1	A_30_P01017479	A_51_P247496	0.809524	0.0077				A_30_P01019650
28	2	A_30_P01017479	A_51_P348792	0.761905	0.0146				A_30_P01019744
29	3	A_30_P01017479	A_51_P401501	0.857143	0.0032				A_30_P01019821
30	4	A_30_P01017479	A_51_P403728	0.738095	0.0172				A_30_P01019858
31	5	A_30_P01017479	A_51_P443032	0.833333	0.0056				A_30_P01019996
32	6	A_30_P01017479	A_51_P445211	0.738095	0.0165				A_30_P01020058
33	7	A_30_P01017479	A_52_P205603	0.761905	0.0146				A_30_P01020197
34	8	A_30_P01017479	A_52_P525725	0.833333	0.0057				A_30_P01020238
35	9	A_30_P01017479	A_52_P589763	0.857143	0.0033				A_30_P01020293
36	10	A_30_P01017479	A_52_P634122	0.738095	0.0168				A_30_P01020398
37	11	A_30_P01017479	A_52_P636050	0.833333	0.0054				A_30_P01020484
38	12	A_30_P01017479	A_52_P84347	0.904762	0.0012				A_30_P01020563
39	13	A_30_P01017479	A_55_P1977204	0.857143	0.0039				A_30_P01020575
40	14	A_30_P01017479	A_55_P1977528	0.809524	0.0074				A_30_P01020646
41	15	A_30_P01017479	A_55_P1979888	0.833333	0.0053				A_30_P01020670
42	16	A_30_P01017479	A_55_P1981035	0.714286	0.0217				A_30_P01020694
43	17	A_30_P01017479	A_55_P1990864	0.785714	0.0113				A_30_P01020817
44	18	A_30_P01017479	A_55_P1991421	0.738095	0.0177				A_30_P01020881
45	19	A_30_P01017479	A_55_P1995283	0.738095	0.0181				A_30_P01020913
46	20	A_30_P01017479	A_55_P1996434	0.738095	0.0166				A_30_P01020948
47	21	A_30_P01017479	A_55_P1998204	0.904762	0.0008				A_30_P01021071
48	22	A_30_P01017479	A_55_P1999369	0.761905	0.0148				A_30_P01021089
49	23	A_30_P01017479	A_55_P2001966	0.738095	0.0177				A_30_P01021150
50	24	A_30_P01017479	A_55_P2006053	0.809524	0.0093				A_30_P01021166
51	25	A_30_P01017479	A_55_P2024282	0.738095	0.0196				A_30_P01021201
52	26	A_30_P01017479	A_55_P2040534	0.833333	0.0049				A_30_P01021429
53	27	A_30_P01017479	A_55_P2047877	0.97619	0				A_30_P01021450
54	28	A_30_P01017479	A_55_P2052136	0.857143	0.0039				A_30_P01021601
55	29	A_30_P01017479	A_55_P2057856	0.809524	0.0078				A_30_P01021661
56	30	A_30_P01017479	A_55_P2063508	0.738095	0.0199				A_30_P01021675
57	31	A_30_P01017479	A_55_P2071566	0.952381	0.0002				A_30_P01022077
58	32	A_30_P01017479	A_55_P2091931	0.857143	0.0029				A_30_P01022078
59	33	A_30_P01017479	A_55_P2100725	0.761905	0.0123				A_30_P01022153
60	34	A_30_P01017479	A_55_P2117055	0.880952	0.0035				A_30_P01022226
61	35	A_30_P01017479	A_55_P2117506	0.809524	0.0075				A_30_P01022286
62	36	A_30_P01017479	A_55_P2117950	0.833333	0.0052				A_30_P01022550
63	37	A_30_P01017479	A_55_P2132010	0.809524	0.0076				A_30_P01022616
64	38	A_30_P01017479	A_55_P2134336	0.761905	0.0143				A_30_P01022695
65	39	A_30_P01017479	A_55_P2143601	0.714286	0.0228				A_30_P01022754
66	40	A_30_P01017479	A_55_P2148748	0.809524	0.0068				A_30_P01022793
67	41	A_30_P01017479	A_55_P2153331	0.761905	0.0142				A_30_P01022926
68	42	A_30_P01017479	A_55_P2162970	0.738095	0.0194				A_30_P01023001
69	43	A_30_P01017479	A_55_P2169989	0.714286	0.0232				A_30_P01023009
70	44	A_30_P01017479	A_55_P2263277	0.761905	0.0124				A_30_P01023034
71	45	A_30_P01017479	A_55_P2316682	0.809524	0.0081				A_30_P01023044
72	46	A_30_P01017479	A_55_P2322961	0.785714	0.0112				A_30_P01023099
73	47	A_30_P01017479	A_55_P2342537	0.785714	0.0131				A_30_P01023202
74	48	A_30_P01017479	A_55_P2359110	0.738095	0.0175				A_30_P01023288
75	49	A_30_P01017479	A_55_P2387515	0.809524	0.0066				A_30_P01023327
76	50	A_30_P01017479	A_66_P136735	0.952381	0.0001				A_30_P01023336
77	51	A_30_P01017479	A_66_P139367	0.809524	0.0063				A_30_P01023395
78	52	A_30_P01017479	A_51_P347529	-0.952381	0.0001				A_30_P01023460
79	53	A_30_P01017479	A_55_P2004526	-0.738095	0.0184				A_30_P01023650
80	54	A_30_P01017479	A_55_P2071354	-0.714286	0.023				A_30_P01023656
81	55	A_30_P01017479	A_55_P2152225	-0.880952	0.0017				A_30_P01023684
82	1	A_30_P01017551	A_51_P158814	0.785714	0.0129				A_30_P01023689
83	2	A_30_P01017551	A_52_P395280	-0.738095	0.0198				A_30_P01023691
84	3	A_30_P01017551	A_52_P644865	0.690476	0.0247				A_30_P01023773
85	4	A_30_P01017551	A_55_P2026238	0.714286	0.0226				A_30_P01023782
86	5	A_30_P01017551	A_55_P2029446	0.785714	0.011				A_30_P01024018
87	6	A_30_P01017551	A_55_P2054703	0.761905	0.0129				A_30_P01024025
88	7	A_30_P01017551	A_55_P2112419	0.761905	0.0138				A_30_P01024130
89	8	A_30_P01017551	A_55_P2114651	0.833333	0.0054				A_30_P01024148
90	9	A_30_P01017551	A_55_P2116310	0.761905	0.0109				A_30_P01024194
91	10	A_30_P01017551	A_55_P2143601	0.785714	0.0106				A_30_P01024225
92	11	A_30_P01017551	A_55_P2148333	0.857143	0.0039				A_30_P01024312
93	12	A_30_P01017551	A_55_P2151591	0.714286	0.0218				A_30_P01024417
94	13	A_30_P01017551	A_55_P2159875	0.833333	0.0059				A_30_P01024420
95	14	A_30_P01017551	A_55_P2223502	-0.714286	0.0235				A_30_P01024526
96	15	A_30_P01017551	A_55_P2243277	0.738095	0.0207				A_30_P01024536
97	16	A_30_P01017551	A_66_P140856	0.880952	0.0016				A_30_P01024763
98	17	A_30_P01017551	A_51_P115471	-0.785714	0.0101				A_30_P01024786
99	18	A_30_P01017551	A_51_P298837	-0.833333	0.0057				A_30_P01024806
100	19	A_30_P01017551	A_51_P432607	-0.809524	0.0085				A_30_P01024816
101	20	A_30_P01017551	A_55_P1983944	-0.833333	0.0047				A_30_P01024834
102	21	A_30_P01017551	A_55_P2082880	-0.761905	0.0146				A_30_P01024836
103	22	A_30_P01017551	A_55_P2175146	-0.809524	0.0075				A_30_P01024924
104	1	A_30_P01017600	A_51_P118400	0.714286	0.0234				A_30_P01024975
105	2	A_30_P01017600	A_51_P158814	-0.714286	0.0215				A_30_P01025034
106	3	A_30_P01017600	A_51_P166266	0.738095	0.0192				A_30_P01025064
107	4	A_30_P01017600	A_51_P385928	-0.785714	0.0123				A_30_P01025099
108	5	A_30_P01017600	A_52_P240712	0.714286	0.0217				A_30_P01025169
109	6	A_30_P01017600	A_52_P72965	0.714286	0.024				A_30_P01025244
110	7	A_30_P01017600	A_55_P1983459	-0.714286	0.0218				A_30_P01025262
111	8	A_30_P01017600	A_55_P1994453	-0.857143	0.0027				A_30_P01025347
112	9	A_30_P01017600	A_55_P2003931	-0.785714	0.0115				A_30_P01025371
113	10	A_30_P01017600	A_55_P2013198	0.761905	0.0147				A_30_P01025432
114	11	A_30_P01017600	A_55_P2014760	0.952381	0.0004				A_30_P01025520
115	12	A_30_P01017600	A_55_P2016972	-0.761905	0.0151				A_30_P01025543
116	13	A_30_P01017600	A_55_P2021014	-0.833333	0.0055				A_30_P01025555
117	14	A_30_P01017600	A_55_P2029446	-0.738095	0.0195				A_30_P01025579
118	15	A_30_P01017600	A_55_P2032449	0.809524	0.0082				A_30_P01025668
119	16	A_30_P01017600	A_55_P2035824	0.714286	0.0223				A_30_P01025677
120	17	A_30_P01017600	A_55_P2040485	0.880952	0.0018				A_30_P01025724
121	18	A_30_P01017600	A_55_P2042183	-0.809524	0.0092				A_30_P01025774
122	19	A_30_P01017600	A_55_P2045966	-0.785714	0.0117				A_30_P01025786
123	20	A_30_P01017600	A_55_P2053142	-0.97619	0				A_30_P01025926
124	21	A_30_P01017600	A_55_P2055055	-0.833333	0.0049				A_30_P01025999
125	22	A_30_P01017600	A_55_P2065325	-0.714286	0.0237				A_30_P01026030
126	23	A_30_P01017600	A_55_P2071176	0.857143	0.0033				A_30_P01026035
127	24	A_30_P01017600	A_55_P2075333	-0.714286	0.0227				A_30_P01026058
128	25	A_30_P01017600	A_55_P2105321	-0.761905	0.0111				A_30_P01026135
129	26	A_30_P01017600	A_55_P2115131	0.761905	0.0139				A_30_P01026158
130	27	A_30_P01017600	A_55_P2123496	-0.738095	0.0193				A_30_P01026186
131	28	A_30_P01017600	A_55_P2140286	0.857143	0.0041				A_30_P01026239
132	29	A_30_P01017600	A_55_P2143622	-0.761905	0.0157				A_30_P01026290
133	30	A_30_P01017600	A_55_P2148821	-0.738095	0.0153				A_30_P01026298
134	31	A_30_P01017600	A_55_P2162122	0.928571	0.0003				A_30_P01026768
135	32	A_30_P01017600	A_55_P2167818	-0.785714	0.0093				A_30_P01026893
136	33	A_30_P01017600	A_55_P2255146	-0.952381	0.0005				A_30_P01026920
137	34	A_30_P01017600	A_55_P2393543	-0.785714	0.0106				A_30_P01027033
138	35	A_30_P01017600	A_55_P2426799	-0.809524	0.007				A_30_P01027063
139	36	A_30_P01017600	A_66_P119771	0.785714	0.0121				A_30_P01027069
140	37	A_30_P01017600	A_66_P131137	0.738095	0.0183				A_30_P01027079
141	38	A_30_P01017600	A_51_P115471	0.714286	0.023				A_30_P01027163
142	39	A_30_P01017600	A_51_P169445	-0.857143	0.0026				A_30_P01027210
143	40	A_30_P01017600	A_51_P250001	-0.809524	0.0077				A_30_P01027217
144	41	A_30_P01017600	A_51_P350048	-0.714286	0.0231				A_30_P01027256
145	42	A_30_P01017600	A_51_P408974	-0.761905	0.0132				A_30_P01027308
146	43	A_30_P01017600	A_52_P344424	-0.928571	0.0005				A_30_P01027448
147	44	A_30_P01017600	A_52_P40504	-0.738095	0.0202				A_30_P01027531
148	45	A_30_P01017600	A_52_P770640	0.833333	0.0052				A_30_P01027580
149	46	A_30_P01017600	A_55_P1954346	-0.833333	0.0055				A_30_P01027595
150	47	A_30_P01017600	A_55_P1970131	0.857143	0.0038				A_30_P01027620
151	48	A_30_P01017600	A_55_P2100088	-0.761905	0.0152				A_30_P01027731
152	49	A_30_P01017600	A_55_P2130501	-0.833333	0.0052				A_30_P01027750
153	50	A_30_P01017600	A_55_P2140676	0.857143	0.0039				A_30_P01027766
154	51	A_30_P01017600	A_55_P2163319	-0.785714	0.0104				A_30_P01027786
155	52	A_30_P01017600	A_55_P2164744	0.761905	0.0147				A_30_P01027825
156	1	A_30_P01017662	A_51_P367916	0.738095	0.0178				A_30_P01027934
157	2	A_30_P01017662	A_52_P1004616	0.857143	0.0039				A_30_P01027944
158	3	A_30_P01017662	A_55_P1956497	0.761905	0.0136				A_30_P01028192
159	4	A_30_P01017662	A_55_P1966369	0.785714	0.0111				A_30_P01028264
160	5	A_30_P01017662	A_55_P1997676	0.785714	0.0114				A_30_P01028307
161	6	A_30_P01017662	A_55_P2018841	0.809524	0.0083				A_30_P01028335
162	7	A_30_P01017662	A_55_P2032449	0.809524	0.0085				A_30_P01028352
163	8	A_30_P01017662	A_55_P2035824	0.904762	0.0014				A_30_P01028414
164	9	A_30_P01017662	A_55_P2055920	0.880952	0.0024				A_30_P01028419
165	10	A_30_P01017662	A_55_P2057168	0.714286	0.0222				A_30_P01028438
166	11	A_30_P01017662	A_55_P2077623	0.904762	0.0009				A_30_P01028463
167	12	A_30_P01017662	A_55_P2096324	0.809524	0.0078				A_30_P01028531
168	13	A_30_P01017662	A_55_P2117506	0.714286	0.0236				A_30_P01028536
169	14	A_30_P01017662	A_55_P2142404	0.809524	0.0083				A_30_P01028541
170	15	A_30_P01017662	A_55_P2150352	0.738095	0.0194				A_30_P01028672
171	16	A_30_P01017662	A_55_P2383083	0.738095	0.0167				A_30_P01028692
172	17	A_30_P01017662	A_66_P109460	0.809524	0.0065				A_30_P01028693
173	18	A_30_P01017662	A_55_P2004026	-0.833333	0.0064				A_30_P01028715
174	19	A_30_P01017662	A_55_P2182662	-0.714286	0.0238				A_30_P01028767
175	20	A_30_P01017662	A_55_P2372198	-0.928571	0.0005				A_30_P01028772
176	1	A_30_P01017672	A_51_P243187	0.761905	0.0139				A_30_P01028786
177	2	A_30_P01017672	A_51_P348792	0.880952	0.0033				A_30_P01028820
178	3	A_30_P01017672	A_51_P394104	0.809524	0.0058				A_30_P01028851
179	4	A_30_P01017672	A_51_P500949	0.761905	0.0148				A_30_P01028902
180	5	A_30_P01017672	A_51_P504704	0.833333	0.0047				A_30_P01029135
181	6	A_30_P01017672	A_52_P546200	0.714286	0.0241				A_30_P01029151
182	7	A_30_P01017672	A_52_P589763	0.809524	0.008				A_30_P01029246
183	8	A_30_P01017672	A_52_P634122	0.785714	0.0113				A_30_P01029286
184	9	A_30_P01017672	A_52_P636050	0.809524	0.0086				A_30_P01029302
185	10	A_30_P01017672	A_52_P84347	0.761905	0.0126				A_30_P01029308
186	11	A_30_P01017672	A_55_P1952998	0.761905	0.0141				A_30_P01029367
187	12	A_30_P01017672	A_55_P1960172	0.833333	0.0053				A_30_P01029461
188	13	A_30_P01017672	A_55_P1977220	0.714286	0.022				A_30_P01029471
189	14	A_30_P01017672	A_55_P1977528	0.928571	0.0005				A_30_P01029617
190	15	A_30_P01017672	A_55_P1981035	0.714286	0.0241				A_30_P01029775
191	16	A_30_P01017672	A_55_P1996434	0.738095	0.0178				A_30_P01029785
192	17	A_30_P01017672	A_55_P1997676	0.714286	0.0231				A_30_P01029814
193	18	A_30_P01017672	A_55_P1998204	0.880952	0.0025				A_30_P01029816
194	19	A_30_P01017672	A_55_P1999369	0.761905	0.0134				A_30_P01029985
195	20	A_30_P01017672	A_55_P2001966	0.857143	0.0048				A_30_P01030037
196	21	A_30_P01017672	A_55_P2011555	0.857143	0.0036				A_30_P01030318
197	22	A_30_P01017672	A_55_P2034491	0.857143	0.0029				A_30_P01030327
198	23	A_30_P01017672	A_55_P2047877	0.785714	0.012				A_30_P01030354
199	24	A_30_P01017672	A_55_P2055920	0.761905	0.0147				A_30_P01030415
200	25	A_30_P01017672	A_55_P2117055	0.904762	0.0008				A_30_P01030444
201	26	A_30_P01017672	A_55_P2117950	0.761905	0.0135				A_30_P01030463
202	27	A_30_P01017672	A_55_P2167249	0.809524	0.0097				A_30_P01030628
203	28	A_30_P01017672	A_55_P2263277	0.904762	0.0013				A_30_P01030684
204	29	A_30_P01017672	A_55_P2283207	0.833333	0.0056				A_30_P01030695
205	30	A_30_P01017672	A_55_P2359110	0.738095	0.0187				A_30_P01030743
206	31	A_30_P01017672	A_55_P2387515	0.714286	0.0236				A_30_P01030797
207	32	A_30_P01017672	A_66_P119757	0.785714	0.0103				A_30_P01030864
208	33	A_30_P01017672	A_66_P128564	0.738095	0.0184				A_30_P01031115
209	34	A_30_P01017672	A_66_P136735	0.714286	0.0222				A_30_P01031160
210	35	A_30_P01017672	A_66_P139233	0.809524	0.0072				A_30_P01031185
211	36	A_30_P01017672	A_66_P139367	0.809524	0.0094				A_30_P01031225
212	37	A_30_P01017672	A_51_P347529	-0.714286	0.0218				A_30_P01031236
213	38	A_30_P01017672	A_55_P1988784	-0.857143	0.0032				A_30_P01031451
214	39	A_30_P01017672	A_55_P2004526	-0.738095	0.0166				A_30_P01031489
215	40	A_30_P01017672	A_55_P2004527	-0.809524	0.0071				A_30_P01031512
216	41	A_30_P01017672	A_55_P2152225	-0.761905	0.0139				A_30_P01031527
217	1	A_30_P01017727	A_51_P133761	0.761905	0.0136				A_30_P01031581
218	2	A_30_P01017727	A_51_P221753	0.761905	0.0131				A_30_P01031584
219	3	A_30_P01017727	A_51_P270355	0.761905	0.0143				A_30_P01031594
220	4	A_30_P01017727	A_51_P270426	0.904762	0.0005				A_30_P01031717
221	5	A_30_P01017727	A_51_P404139	0.761905	0.0147				A_30_P01031760
222	6	A_30_P01017727	A_52_P240712	0.714286	0.0241				A_30_P01031839
223	7	A_30_P01017727	A_52_P279110	0.833333	0.0054				A_30_P01031909
224	8	A_30_P01017727	A_52_P395280	0.761905	0.0141				A_30_P01031948
225	9	A_30_P01017727	A_52_P515880	0.809524	0.0077				A_30_P01032122
226	10	A_30_P01017727	A_52_P58359	0.880952	0.0024				A_30_P01032137
227	11	A_30_P01017727	A_55_P1962400	0.738095	0.0177				A_30_P01032213
228	12	A_30_P01017727	A_55_P1966369	0.809524	0.0092				A_30_P01032346
229	13	A_30_P01017727	A_55_P1987379	0.714286	0.0215				A_30_P01032482
230	14	A_30_P01017727	A_55_P1994962	0.761905	0.0139				A_30_P01032637
231	15	A_30_P01017727	A_55_P2000888	0.714286	0.0225				A_30_P01032653
232	16	A_30_P01017727	A_55_P2006625	0.833333	0.0057				A_30_P01032676
233	17	A_30_P01017727	A_55_P2016652	0.809524	0.0069				A_30_P01032914
234	18	A_30_P01017727	A_55_P2018841	0.738095	0.0184				A_30_P01032987
235	19	A_30_P01017727	A_55_P2022743	0.857143	0.0046				A_30_P01033031
236	20	A_30_P01017727	A_55_P2024095	0.714286	0.0224				A_30_P01033038
237	21	A_30_P01017727	A_55_P2027895	0.761905	0.0153				A_30_P01033065
238	22	A_30_P01017727	A_55_P2032449	0.738095	0.0176				A_30_P01033103
239	23	A_30_P01017727	A_55_P2051476	0.738095	0.0181				A_30_P01033135
240	24	A_30_P01017727	A_55_P2064955	0.928571	0.0007				A_30_P01033141
241	25	A_30_P01017727	A_55_P2065325	-0.809524	0.008				A_30_P01033265
242	26	A_30_P01017727	A_55_P2068501	0.833333	0.0058				A_30_P01033317
243	27	A_30_P01017727	A_55_P2081101	0.738095	0.0195				A_30_P01033352
244	28	A_30_P01017727	A_55_P2096324	0.761905	0.0147				A_30_P01033411
245	29	A_30_P01017727	A_55_P2105413	0.761905	0.0131				A_30_P01033419
246	30	A_30_P01017727	A_55_P2118552	0.809524	0.0056				A_30_P01033433
247	31	A_30_P01017727	A_55_P2123912	0.833333	0.0051				A_30_P01033552
248	32	A_30_P01017727	A_55_P2132831	0.761905	0.0133				A_30_P01033590
249	33	A_30_P01017727	A_55_P2141167	0.785714	0.0114				A_30_P01017487
250	34	A_30_P01017727	A_55_P2148746	0.904762	0.0006				A_30_P01017556
251	35	A_30_P01017727	A_55_P2149585	0.833333	0.0051				A_30_P01017939
252	36	A_30_P01017727	A_55_P2150352	0.738095	0.0181				A_30_P01018625
253	37	A_30_P01017727	A_55_P2161397	-0.785714	0.0103				A_30_P01018777
254	38	A_30_P01017727	A_55_P2288983	0.833333	0.0054				A_30_P01019595
255	39	A_30_P01017727	A_55_P2341358	0.738095	0.0191				A_30_P01019608
256	40	A_30_P01017727	A_55_P2383083	0.880952	0.0024				A_30_P01020124
257	41	A_30_P01017727	A_55_P2387665	0.809524	0.0062				A_30_P01020241
258	42	A_30_P01017727	A_66_P109460	0.809524	0.0075				A_30_P01020527
259	43	A_30_P01017727	A_52_P106560	-0.761905	0.0145				A_30_P01020539
260	44	A_30_P01017727	A_55_P1957238	-0.809524	0.0074				A_30_P01020619
261	45	A_30_P01017727	A_55_P1994132	-0.761905	0.0137				A_30_P01021084
262	46	A_30_P01017727	A_55_P1996251	-0.904762	0.0017				A_30_P01021129
263	47	A_30_P01017727	A_55_P2024313	-0.928571	0.0008				A_30_P01021337
264	48	A_30_P01017727	A_55_P2151956	-0.761905	0.0134				A_30_P01021468
265	49	A_30_P01017727	A_55_P2175146	0.761905	0.0131				A_30_P01021512
266	50	A_30_P01017727	A_55_P2200870	-0.761905	0.0123				A_30_P01021552
267	51	A_30_P01017727	A_55_P2353743	-0.738095	0.021				A_30_P01021565
268	52	A_30_P01017727	A_66_P132834	-0.857143	0.003				A_30_P01021599
269	53	A_30_P01017727	A_66_P137374	-0.833333	0.005				A_30_P01021686
270	1	A_30_P01017863	A_51_P192139	0.809524	0.0073				A_30_P01021882
271	2	A_30_P01017863	A_51_P348792	0.738095	0.0159				A_30_P01021932
272	3	A_30_P01017863	A_51_P445211	0.833333	0.0052				A_30_P01022285
273	4	A_30_P01017863	A_52_P201800	0.97619	0				A_30_P01022591
274	5	A_30_P01017863	A_52_P355169	0.714286	0.0222				A_30_P01022710
275	6	A_30_P01017863	A_52_P525725	0.809524	0.0094				A_30_P01022913
276	7	A_30_P01017863	A_52_P546200	0.785714	0.012				A_30_P01023152
277	8	A_30_P01017863	A_55_P1952981	0.857143	0.003				A_30_P01023297
278	9	A_30_P01017863	A_55_P1977204	0.761905	0.015				A_30_P01023444
279	10	A_30_P01017863	A_55_P1996434	0.97619	0.0001				A_30_P01024003
280	11	A_30_P01017863	A_55_P2001966	0.714286	0.0236				A_30_P01024207
281	12	A_30_P01017863	A_55_P2016972	0.761905	0.0122				A_30_P01024464
282	13	A_30_P01017863	A_55_P2044257	0.714286	0.0219				A_30_P01024542
283	14	A_30_P01017863	A_55_P2052166	0.738095	0.0187				A_30_P01024626
284	15	A_30_P01017863	A_55_P2091931	0.785714	0.0108				A_30_P01024720
285	16	A_30_P01017863	A_55_P2112419	0.833333	0.0051				A_30_P01024751
286	17	A_30_P01017863	A_55_P2116310	0.761905	0.0137				A_30_P01025339
287	18	A_30_P01017863	A_55_P2142064	0.880952	0.0031				A_30_P01025457
288	19	A_30_P01017863	A_55_P2143991	0.880952	0.0023				A_30_P01025460
289	20	A_30_P01017863	A_55_P2161397	0.857143	0.0036				A_30_P01025478
290	21	A_30_P01017863	A_55_P2162970	0.904762	0.0015				A_30_P01025969
291	22	A_30_P01017863	A_55_P2183837	0.880952	0.0031				A_30_P01026310
292	23	A_30_P01017863	A_55_P2243277	0.809524	0.0075				A_30_P01026394
293	24	A_30_P01017863	A_55_P2263277	0.714286	0.0227				A_30_P01026421
294	25	A_30_P01017863	A_55_P2322961	0.904762	0.0009				A_30_P01026472
295	26	A_30_P01017863	A_55_P2342537	0.833333	0.0051				A_30_P01027042
296	27	A_30_P01017863	A_55_P2363902	0.833333	0.0049				A_30_P01027311
297	28	A_30_P01017863	A_55_P2387515	0.785714	0.0102				A_30_P01027347
298	29	A_30_P01017863	A_66_P113325	0.738095	0.0175				A_30_P01028442
299	30	A_30_P01017863	A_66_P134457	0.738095	0.0184				A_30_P01028551
300	31	A_30_P01017863	A_66_P140856	0.714286	0.0225				A_30_P01028849
301	32	A_30_P01017863	A_51_P217463	-0.952381	0				A_30_P01029096
302	33	A_30_P01017863	A_51_P347529	-0.833333	0.0041				A_30_P01029288
303	34	A_30_P01017863	A_52_P97572	-1	0				A_30_P01029443
304	35	A_30_P01017863	A_55_P2004526	-0.97619	0				A_30_P01029517
305	36	A_30_P01017863	A_55_P2004527	-0.880952	0.002				A_30_P01029560
306	37	A_30_P01017863	A_55_P2007131	-0.714286	0.0217				A_30_P01030254
307	38	A_30_P01017863	A_55_P2019312	-0.761905	0.0128				A_30_P01030557
308	39	A_30_P01017863	A_55_P2082880	-0.761905	0.0124				A_30_P01030637
309	40	A_30_P01017863	A_55_P2083283	-0.809524	0.0063				A_30_P01030792
310	41	A_30_P01017863	A_55_P2125997	-0.785714	0.0108				A_30_P01030867
311	1	A_30_P01017901	A_51_P443032	0.809524	0.0072				A_30_P01030899
312	2	A_30_P01017901	A_52_P139716	0.714286	0.0231				A_30_P01031124
313	3	A_30_P01017901	A_52_P228005	0.904762	0.0008				A_30_P01031208
314	4	A_30_P01017901	A_52_P463154	0.738095	0.0163				A_30_P01031223
315	5	A_30_P01017901	A_52_P525725	0.880952	0.0018				A_30_P01031414
316	6	A_30_P01017901	A_55_P2006053	0.714286	0.0219				A_30_P01031801
317	7	A_30_P01017901	A_55_P2024282	0.761905	0.0139				A_30_P01031966
318	8	A_30_P01017901	A_55_P2026238	0.785714	0.0116				A_30_P01032333
319	9	A_30_P01017901	A_55_P2087345	0.785714	0.0102				A_30_P01032611
320	10	A_30_P01017901	A_55_P2091651	0.738095	0.018				A_30_P01032683
321	11	A_30_P01017901	A_55_P2112419	0.809524	0.0068				A_30_P01032687
322	12	A_30_P01017901	A_55_P2143601	0.785714	0.0119				A_30_P01032734
323	13	A_30_P01017901	A_55_P2151591	0.714286	0.0234				A_30_P01032791
324	14	A_30_P01017901	A_55_P2162970	0.785714	0.0128				A_30_P01033011
325	15	A_30_P01017901	A_55_P2169989	0.714286	0.0244				A_30_P01033387
326	16	A_30_P01017901	A_55_P2243277	0.833333	0.0064				A_30_P01033435
327	17	A_30_P01017901	A_55_P2322961	0.809524	0.0094				A_30_P01033585
328	18	A_30_P01017901	A_55_P2342537	0.761905	0.0136
329	19	A_30_P01017901	A_66_P139497	0.714286	0.0224
330	20	A_30_P01017901	A_66_P140856	0.761905	0.0146
331	21	A_30_P01017901	A_51_P432011	-0.761905	0.0156
332	22	A_30_P01017901	A_55_P2082880	-0.857143	0.0037
333	1	A_30_P01018008	A_51_P162144	0.714286	0.0212
334	2	A_30_P01018008	A_51_P245895	0.714286	0.0224
335	3	A_30_P01018008	A_51_P247496	0.714286	0.023
336	4	A_30_P01018008	A_51_P270355	0.738095	0.0164
337	5	A_30_P01018008	A_51_P348792	0.880952	0.0025
338	6	A_30_P01018008	A_51_P394104	0.904762	0.0011
339	7	A_30_P01018008	A_51_P403728	0.714286	0.0249
340	8	A_30_P01018008	A_51_P500949	0.738095	0.0179
341	9	A_30_P01018008	A_52_P205603	0.785714	0.0112
342	10	A_30_P01018008	A_52_P502226	0.904762	0.0009
343	11	A_30_P01018008	A_52_P589763	0.833333	0.0051
344	12	A_30_P01018008	A_52_P7513	0.761905	0.0133
345	13	A_30_P01018008	A_55_P1956497	0.714286	0.024
346	14	A_30_P01018008	A_55_P1960172	0.809524	0.0086
347	15	A_30_P01018008	A_55_P1998204	0.857143	0.0032
348	16	A_30_P01018008	A_55_P2001966	0.904762	0.0012
349	17	A_30_P01018008	A_55_P2011555	0.761905	0.0156
350	18	A_30_P01018008	A_55_P2028517	0.833333	0.0055
351	19	A_30_P01018008	A_55_P2047877	0.785714	0.0115
352	20	A_30_P01018008	A_55_P2052136	0.952381	0.0003
353	21	A_30_P01018008	A_55_P2057856	0.833333	0.0053
354	22	A_30_P01018008	A_55_P2059283	0.714286	0.0233
355	23	A_30_P01018008	A_55_P2063508	0.738095	0.0167
356	24	A_30_P01018008	A_55_P2091931	0.785714	0.0105
357	25	A_30_P01018008	A_55_P2100725	0.809524	0.0071
358	26	A_30_P01018008	A_55_P2117055	0.761905	0.0146
359	27	A_30_P01018008	A_55_P2117506	0.714286	0.0233
360	28	A_30_P01018008	A_55_P2117950	0.714286	0.0237
361	29	A_30_P01018008	A_55_P2132010	0.761905	0.0121
362	30	A_30_P01018008	A_55_P2142404	0.785714	0.0095
363	31	A_30_P01018008	A_55_P2149630	0.785714	0.0112
364	32	A_30_P01018008	A_55_P2154005	0.904762	0.001
365	33	A_30_P01018008	A_55_P2263277	0.738095	0.0175
366	34	A_30_P01018008	A_55_P2293013	0.833333	0.0063
367	35	A_30_P01018008	A_55_P2317575	0.809524	0.0073
368	36	A_30_P01018008	A_66_P139233	0.714286	0.0239
369	37	A_30_P01018008	A_66_P139367	0.857143	0.0048
370	38	A_30_P01018008	A_55_P1988784	-0.880952	0.0017
371	1	A_30_P01018054	A_51_P104172	0.761905	0.0149
372	2	A_30_P01018054	A_51_P162144	0.761905	0.0125
373	3	A_30_P01018054	A_51_P270426	0.785714	0.0106
374	4	A_30_P01018054	A_52_P279110	0.880952	0.0022
375	5	A_30_P01018054	A_52_P395280	0.785714	0.009
376	6	A_30_P01018054	A_52_P515880	0.880952	0.0017
377	7	A_30_P01018054	A_52_P58359	0.761905	0.0147
378	8	A_30_P01018054	A_52_P599573	0.738095	0.0181
379	9	A_30_P01018054	A_55_P1962400	0.833333	0.0053
380	10	A_30_P01018054	A_55_P1966369	0.809524	0.0075
381	11	A_30_P01018054	A_55_P1994962	0.714286	0.024
382	12	A_30_P01018054	A_55_P1996742	0.809524	0.0061
383	13	A_30_P01018054	A_55_P1999434	0.833333	0.0045
384	14	A_30_P01018054	A_55_P2055920	0.714286	0.0219
385	15	A_30_P01018054	A_55_P2057168	0.738095	0.018
386	16	A_30_P01018054	A_55_P2064955	0.738095	0.0185
387	17	A_30_P01018054	A_55_P2077623	0.880952	0.0034
388	18	A_30_P01018054	A_55_P2079535	0.809524	0.0079
389	19	A_30_P01018054	A_55_P2086750	0.738095	0.0174
390	20	A_30_P01018054	A_55_P2087013	0.738095	0.0202
391	21	A_30_P01018054	A_55_P2096324	0.880952	0.0019
392	22	A_30_P01018054	A_55_P2115131	0.714286	0.0226
393	23	A_30_P01018054	A_55_P2117506	0.738095	0.0202
394	24	A_30_P01018054	A_55_P2118552	0.809524	0.0073
395	25	A_30_P01018054	A_55_P2134172	0.833333	0.0047
396	26	A_30_P01018054	A_55_P2138966	0.809524	0.0068
397	27	A_30_P01018054	A_55_P2148746	0.904762	0.0011
398	28	A_30_P01018054	A_55_P2148748	0.714286	0.0223
399	29	A_30_P01018054	A_55_P2150352	0.952381	0.0001
400	30	A_30_P01018054	A_55_P2182389	0.809524	0.0065
401	31	A_30_P01018054	A_55_P2223502	0.785714	0.0118
402	32	A_30_P01018054	A_55_P2274423	0.738095	0.0198
403	33	A_30_P01018054	A_55_P2288983	0.857143	0.0037
404	34	A_30_P01018054	A_55_P2299637	0.738095	0.0204
405	35	A_30_P01018054	A_55_P2359110	0.857143	0.0044
406	36	A_30_P01018054	A_55_P2383083	0.761905	0.0123
407	37	A_30_P01018054	A_55_P2418824	0.857143	0.0032
408	38	A_30_P01018054	A_66_P109460	0.809524	0.0067
409	39	A_30_P01018054	A_66_P114826	0.809524	0.0062
410	40	A_30_P01018054	A_51_P408974	-0.738095	0.0202
411	41	A_30_P01018054	A_51_P501803	-0.857143	0.0036
412	42	A_30_P01018054	A_55_P1957238	-0.904762	0.0008
413	43	A_30_P01018054	A_55_P1994132	-0.714286	0.0249
414	44	A_30_P01018054	A_55_P2004026	-0.714286	0.0218
415	45	A_30_P01018054	A_55_P2182662	-0.714286	0.0232
416	46	A_30_P01018054	A_55_P2372198	-0.904762	0.0009
417	47	A_30_P01018054	A_66_P137374	-0.785714	0.0101
418	1	A_30_P01018126	A_51_P443032	0.809524	0.0072
419	2	A_30_P01018126	A_52_P525725	0.714286	0.021
420	3	A_30_P01018126	A_52_P599573	0.880952	0.0018
421	4	A_30_P01018126	A_52_P636050	0.809524	0.0096
422	5	A_30_P01018126	A_52_P84347	0.809524	0.0082
423	6	A_30_P01018126	A_55_P1969949	0.761905	0.0139
424	7	A_30_P01018126	A_55_P1977204	0.952381	0
425	8	A_30_P01018126	A_55_P1977220	0.714286	0.0208
426	9	A_30_P01018126	A_55_P1977528	0.761905	0.014
427	10	A_30_P01018126	A_55_P1979888	0.785714	0.0108
428	11	A_30_P01018126	A_55_P1999369	0.761905	0.0131
429	12	A_30_P01018126	A_55_P2047877	0.833333	0.0045
430	13	A_30_P01018126	A_55_P2051400	0.785714	0.0095
431	14	A_30_P01018126	A_55_P2053978	0.714286	0.021
432	15	A_30_P01018126	A_55_P2071566	0.880952	0.0024
433	16	A_30_P01018126	A_55_P2115270	0.738095	0.0197
434	17	A_30_P01018126	A_55_P2117055	0.785714	0.0104
435	18	A_30_P01018126	A_55_P2117506	0.714286	0.0218
436	19	A_30_P01018126	A_55_P2134336	0.857143	0.0034
437	20	A_30_P01018126	A_55_P2148748	0.714286	0.0211
438	21	A_30_P01018126	A_55_P2162970	0.761905	0.015
439	22	A_30_P01018126	A_55_P2169989	0.714286	0.0241
440	23	A_30_P01018126	A_55_P2299637	0.880952	0.0024
441	24	A_30_P01018126	A_55_P2316682	0.714286	0.0243
442	25	A_30_P01018126	A_55_P2322961	0.785714	0.011
443	26	A_30_P01018126	A_55_P2359110	0.738095	0.0191
444	27	A_30_P01018126	A_55_P2387515	0.785714	0.0105
445	28	A_30_P01018126	A_55_P2393558	0.738095	0.0181
446	29	A_30_P01018126	A_55_P2418824	0.809524	0.0072
447	30	A_30_P01018126	A_66_P136735	0.880952	0.0017
448	31	A_30_P01018126	A_51_P347529	-0.833333	0.0053
449	32	A_30_P01018126	A_55_P2071354	-0.761905	0.0134
450	33	A_30_P01018126	A_55_P2152225	-0.952381	0
451	1	A_30_P01018211	A_51_P403728	0.738095	0.0213
452	2	A_30_P01018211	A_51_P443032	0.880952	0.0031
453	3	A_30_P01018211	A_51_P445211	0.738095	0.0188
454	4	A_30_P01018211	A_52_P139716	0.785714	0.0098
455	5	A_30_P01018211	A_52_P201800	0.738095	0.0182
456	6	A_30_P01018211	A_52_P525725	0.928571	0.0007
457	7	A_30_P01018211	A_52_P634122	0.738095	0.0199
458	8	A_30_P01018211	A_55_P1952981	0.714286	0.0219
459	9	A_30_P01018211	A_55_P1969949	0.714286	0.0213
460	10	A_30_P01018211	A_55_P1973950	0.809524	0.008
461	11	A_30_P01018211	A_55_P1977204	0.809524	0.0073
462	12	A_30_P01018211	A_55_P1996434	0.738095	0.0177
463	13	A_30_P01018211	A_55_P2016972	0.809524	0.0093
464	14	A_30_P01018211	A_55_P2024282	0.738095	0.0206
465	15	A_30_P01018211	A_55_P2026238	0.880952	0.0027
466	16	A_30_P01018211	A_55_P2040534	0.738095	0.0193
467	17	A_30_P01018211	A_55_P2044257	0.880952	0.0025
468	18	A_30_P01018211	A_55_P2051400	0.714286	0.0227
469	19	A_30_P01018211	A_55_P2087345	0.738095	0.017
470	20	A_30_P01018211	A_55_P2091931	0.761905	0.0119
471	21	A_30_P01018211	A_55_P2093624	0.785714	0.0104
472	22	A_30_P01018211	A_55_P2112419	0.714286	0.0235
473	23	A_30_P01018211	A_55_P2132010	0.761905	0.0139
474	24	A_30_P01018211	A_55_P2134336	0.809524	0.0081
475	25	A_30_P01018211	A_55_P2148333	0.761905	0.013
476	26	A_30_P01018211	A_55_P2153331	0.809524	0.0069
477	27	A_30_P01018211	A_55_P2162970	0.833333	0.0052
478	28	A_30_P01018211	A_55_P2169989	0.714286	0.0242
479	29	A_30_P01018211	A_55_P2175296	0.714286	0.023
480	30	A_30_P01018211	A_55_P2243277	0.809524	0.0083
481	31	A_30_P01018211	A_55_P2322961	0.928571	0.001
482	32	A_30_P01018211	A_55_P2342537	0.97619	0
483	33	A_30_P01018211	A_55_P2387515	0.761905	0.0159
484	34	A_30_P01018211	A_55_P2393543	0.714286	0.0218
485	35	A_30_P01018211	A_55_P2393558	0.880952	0.0022
486	36	A_30_P01018211	A_51_P183561	-0.714286	0.0201
487	37	A_30_P01018211	A_51_P217463	-0.714286	0.0221
488	38	A_30_P01018211	A_51_P347529	-0.857143	0.0041
489	39	A_30_P01018211	A_52_P97572	-0.785714	0.0112
490	40	A_30_P01018211	A_55_P2004526	-0.738095	0.0166
491	41	A_30_P01018211	A_55_P2290443	-0.785714	0.0095
492	1	A_30_P01018223	A_51_P104172	0.809524	0.0075
493	2	A_30_P01018223	A_51_P133761	0.738095	0.0204
494	3	A_30_P01018223	A_51_P162144	0.880952	0.0027
495	4	A_30_P01018223	A_51_P247496	0.833333	0.0056
496	5	A_30_P01018223	A_51_P401501	0.809524	0.0112
497	6	A_30_P01018223	A_51_P403728	0.738095	0.0182
498	7	A_30_P01018223	A_51_P443032	0.833333	0.005
499	8	A_30_P01018223	A_52_P205603	0.785714	0.0097
500	9	A_30_P01018223	A_52_P589763	0.809524	0.0073
501	10	A_30_P01018223	A_52_P599573	0.833333	0.0057
502	11	A_30_P01018223	A_52_P84347	0.761905	0.0143
503	12	A_30_P01018223	A_55_P1962400	0.809524	0.0068
504	13	A_30_P01018223	A_55_P1977220	0.714286	0.0223
505	14	A_30_P01018223	A_55_P1979888	0.880952	0.0021
506	15	A_30_P01018223	A_55_P1994962	0.833333	0.0064
507	16	A_30_P01018223	A_55_P1995283	0.738095	0.019
508	17	A_30_P01018223	A_55_P1995337	0.904762	0.0007
509	18	A_30_P01018223	A_55_P1998204	0.761905	0.013
510	19	A_30_P01018223	A_55_P1999369	0.714286	0.0234
511	20	A_30_P01018223	A_55_P1999434	0.714286	0.0241
512	21	A_30_P01018223	A_55_P2000888	0.785714	0.0101
513	22	A_30_P01018223	A_55_P2024095	0.880952	0.0033
514	23	A_30_P01018223	A_55_P2027895	0.833333	0.0059
515	24	A_30_P01018223	A_55_P2040534	0.785714	0.01
516	25	A_30_P01018223	A_55_P2047877	0.833333	0.0048
517	26	A_30_P01018223	A_55_P2051400	0.880952	0.0026
518	27	A_30_P01018223	A_55_P2051476	0.714286	0.0237
519	28	A_30_P01018223	A_55_P2052136	0.761905	0.0127
520	29	A_30_P01018223	A_55_P2053978	0.880952	0.0014
521	30	A_30_P01018223	A_55_P2057856	0.714286	0.0225
522	31	A_30_P01018223	A_55_P2071566	0.809524	0.0068
523	32	A_30_P01018223	A_55_P2081101	0.880952	0.0028
524	33	A_30_P01018223	A_55_P2105413	0.761905	0.0138
525	34	A_30_P01018223	A_55_P2115270	0.785714	0.0092
526	35	A_30_P01018223	A_55_P2115315	0.738095	0.0198
527	36	A_30_P01018223	A_55_P2117055	0.738095	0.019
528	37	A_30_P01018223	A_55_P2117506	0.809524	0.0066
529	38	A_30_P01018223	A_55_P2117950	0.785714	0.0089
530	39	A_30_P01018223	A_55_P2118552	0.880952	0.0032
531	40	A_30_P01018223	A_55_P2132831	0.761905	0.0161
532	41	A_30_P01018223	A_55_P2134336	0.809524	0.008
533	42	A_30_P01018223	A_55_P2148746	0.714286	0.0244
534	43	A_30_P01018223	A_55_P2148748	0.952381	0.0001
535	44	A_30_P01018223	A_55_P2149630	0.761905	0.0117
536	45	A_30_P01018223	A_55_P2150352	0.785714	0.01
537	46	A_30_P01018223	A_55_P2153331	0.809524	0.0077
538	47	A_30_P01018223	A_55_P2288983	0.833333	0.0044
539	48	A_30_P01018223	A_55_P2299637	0.809524	0.0081
540	49	A_30_P01018223	A_55_P2316682	0.833333	0.0057
541	50	A_30_P01018223	A_55_P2351024	0.714286	0.0233
542	51	A_30_P01018223	A_55_P2359110	0.880952	0.0022
543	52	A_30_P01018223	A_55_P2387515	0.857143	0.0041
544	53	A_30_P01018223	A_55_P2387665	0.738095	0.0173
545	54	A_30_P01018223	A_55_P2393558	0.738095	0.0164
546	55	A_30_P01018223	A_55_P2418824	0.809524	0.0066
547	56	A_30_P01018223	A_66_P123357	0.785714	0.0095
548	57	A_30_P01018223	A_66_P136735	0.809524	0.0078
549	58	A_30_P01018223	A_51_P347529	-0.809524	0.0074
550	59	A_30_P01018223	A_51_P501803	-0.809524	0.0086
551	60	A_30_P01018223	A_55_P2133776	-0.714286	0.0221
552	61	A_30_P01018223	A_55_P2152225	-0.738095	0.0202
553	62	A_30_P01018223	A_66_P137374	-0.714286	0.0213
554	1	A_30_P01018379	A_51_P158814	0.761905	0.0133
555	2	A_30_P01018379	A_51_P382407	0.833333	0.0048
556	3	A_30_P01018379	A_51_P385928	0.761905	0.0149
557	4	A_30_P01018379	A_52_P634122	0.714286	0.0215
558	5	A_30_P01018379	A_52_P73498	0.761905	0.0129
559	6	A_30_P01018379	A_55_P1973950	0.809524	0.0076
560	7	A_30_P01018379	A_55_P1994453	0.928571	0.0005
561	8	A_30_P01018379	A_55_P2003931	0.880952	0.0021
562	9	A_30_P01018379	A_55_P2014760	-0.833333	0.0046
563	10	A_30_P01018379	A_55_P2016972	0.809524	0.0074
564	11	A_30_P01018379	A_55_P2021014	0.833333	0.005
565	12	A_30_P01018379	A_55_P2026238	0.738095	0.0209
566	13	A_30_P01018379	A_55_P2029446	0.857143	0.0031
567	14	A_30_P01018379	A_55_P2040485	-0.785714	0.012
568	15	A_30_P01018379	A_55_P2042183	0.857143	0.0044
569	16	A_30_P01018379	A_55_P2044257	0.785714	0.0093
570	17	A_30_P01018379	A_55_P2045966	0.833333	0.0054
571	18	A_30_P01018379	A_55_P2053142	0.952381	0.0001
572	19	A_30_P01018379	A_55_P2055055	0.833333	0.0063
573	20	A_30_P01018379	A_55_P2057881	0.714286	0.0229
574	21	A_30_P01018379	A_55_P2071176	-0.809524	0.0068
575	22	A_30_P01018379	A_55_P2093624	0.761905	0.0143
576	23	A_30_P01018379	A_55_P2105321	0.714286	0.0205
577	24	A_30_P01018379	A_55_P2114651	0.714286	0.0248
578	25	A_30_P01018379	A_55_P2115131	-0.738095	0.0191
579	26	A_30_P01018379	A_55_P2140286	-0.833333	0.0048
580	27	A_30_P01018379	A_55_P2143622	0.738095	0.0178
581	28	A_30_P01018379	A_55_P2148333	0.857143	0.0032
582	29	A_30_P01018379	A_55_P2148821	0.738095	0.0174
583	30	A_30_P01018379	A_55_P2150349	0.761905	0.0124
584	31	A_30_P01018379	A_55_P2162122	-0.809524	0.006
585	32	A_30_P01018379	A_55_P2167249	0.738095	0.0169
586	33	A_30_P01018379	A_55_P2167818	0.809524	0.0077
587	34	A_30_P01018379	A_55_P2255146	0.97619	0
588	35	A_30_P01018379	A_55_P2393543	0.785714	0.0106
589	36	A_30_P01018379	A_55_P2426799	0.833333	0.0046
590	37	A_30_P01018379	A_66_P119771	-0.714286	0.0231
591	38	A_30_P01018379	A_66_P134457	0.714286	0.0243
592	39	A_30_P01018379	A_51_P115471	-0.761905	0.0144
593	40	A_30_P01018379	A_51_P169445	0.857143	0.0038
594	41	A_30_P01018379	A_51_P250001	0.880952	0.0023
595	42	A_30_P01018379	A_51_P408974	0.785714	0.009
596	43	A_30_P01018379	A_52_P344424	0.809524	0.0075
597	44	A_30_P01018379	A_52_P770640	-0.928571	0.0001
598	45	A_30_P01018379	A_55_P1954346	0.761905	0.0146
599	46	A_30_P01018379	A_55_P1970131	-0.785714	0.0123
600	47	A_30_P01018379	A_55_P2130501	0.857143	0.0047
601	48	A_30_P01018379	A_55_P2140676	-0.809524	0.0075
602	49	A_30_P01018379	A_55_P2164744	-0.761905	0.0122
603	1	A_30_P01018391	A_51_P192139	0.738095	0.0203
604	2	A_30_P01018391	A_51_P348792	0.785714	0.0122
605	3	A_30_P01018391	A_51_P394104	0.738095	0.0194
606	4	A_30_P01018391	A_51_P504314	0.761905	0.015
607	5	A_30_P01018391	A_51_P504704	0.857143	0.0037
608	6	A_30_P01018391	A_52_P1004616	0.809524	0.0077
609	7	A_30_P01018391	A_52_P148952	0.785714	0.012
610	8	A_30_P01018391	A_52_P355169	0.857143	0.0035
611	9	A_30_P01018391	A_52_P546200	0.785714	0.0108
612	10	A_30_P01018391	A_55_P1996434	0.738095	0.0186
613	11	A_30_P01018391	A_55_P2001966	0.761905	0.0128
614	12	A_30_P01018391	A_55_P2034491	0.785714	0.0082
615	13	A_30_P01018391	A_55_P2055920	0.738095	0.018
616	14	A_30_P01018391	A_55_P2116593	0.714286	0.0223
617	15	A_30_P01018391	A_55_P2144745	0.952381	0.0003
618	16	A_30_P01018391	A_55_P2159875	0.738095	0.0157
619	17	A_30_P01018391	A_55_P2263277	0.738095	0.0181
620	18	A_30_P01018391	A_55_P2363902	0.714286	0.0239
621	19	A_30_P01018391	A_66_P113325	0.904762	0.0012
622	20	A_30_P01018391	A_66_P119757	0.880952	0.0019
623	21	A_30_P01018391	A_66_P128564	0.761905	0.0111
624	22	A_30_P01018391	A_66_P135061	0.97619	0
625	23	A_30_P01018391	A_66_P139233	0.809524	0.008
626	24	A_30_P01018391	A_51_P432607	-0.714286	0.0226
627	25	A_30_P01018391	A_51_P500541	-0.714286	0.0248
628	26	A_30_P01018391	A_52_P398998	-0.714286	0.0224
629	27	A_30_P01018391	A_52_P97572	-0.714286	0.0222
630	28	A_30_P01018391	A_55_P1962329	-0.809524	0.0085
631	29	A_30_P01018391	A_55_P2004526	-0.738095	0.0189
632	30	A_30_P01018391	A_55_P2004527	-0.809524	0.0066
633	31	A_30_P01018391	A_55_P2007131	-0.761905	0.0145
634	32	A_30_P01018391	A_55_P2125997	-0.761905	0.0147
635	33	A_30_P01018391	A_55_P2129442	-0.904762	0.0008
636	34	A_30_P01018391	A_55_P2141004	-0.809524	0.0071
637	35	A_30_P01018391	A_55_P2182662	-0.738095	0.0182
638	1	A_30_P01018561	A_51_P158814	0.809524	0.0085
639	2	A_30_P01018561	A_52_P73498	0.785714	0.0114
640	3	A_30_P01018561	A_55_P1971599	-0.738095	0.0175
641	4	A_30_P01018561	A_55_P1973950	0.809524	0.0073
642	5	A_30_P01018561	A_55_P1994453	0.738095	0.0176
643	6	A_30_P01018561	A_55_P2003931	0.857143	0.0038
644	7	A_30_P01018561	A_55_P2014760	-0.833333	0.0052
645	8	A_30_P01018561	A_55_P2016972	0.928571	0.0004
646	9	A_30_P01018561	A_55_P2021014	0.738095	0.0215
647	10	A_30_P01018561	A_55_P2026238	0.904762	0.0013
648	11	A_30_P01018561	A_55_P2029446	0.809524	0.0074
649	12	A_30_P01018561	A_55_P2042183	0.904762	0.0007
650	13	A_30_P01018561	A_55_P2044257	0.952381	0.0001
651	14	A_30_P01018561	A_55_P2053142	0.904762	0.0012
652	15	A_30_P01018561	A_55_P2055055	0.738095	0.019
653	16	A_30_P01018561	A_55_P2065325	0.785714	0.01
654	17	A_30_P01018561	A_55_P2071176	-0.761905	0.0132
655	18	A_30_P01018561	A_55_P2093624	0.761905	0.0157
656	19	A_30_P01018561	A_55_P2105321	0.952381	0.0005
657	20	A_30_P01018561	A_55_P2114651	0.857143	0.0026
658	21	A_30_P01018561	A_55_P2116310	0.738095	0.0141
659	22	A_30_P01018561	A_55_P2123496	0.904762	0.0012
660	23	A_30_P01018561	A_55_P2140286	-0.738095	0.0164
661	24	A_30_P01018561	A_55_P2148333	0.809524	0.0075
662	25	A_30_P01018561	A_55_P2151591	0.714286	0.0206
663	26	A_30_P01018561	A_55_P2162122	-0.761905	0.0139
664	27	A_30_P01018561	A_55_P2167818	0.857143	0.0038
665	28	A_30_P01018561	A_55_P2175296	0.761905	0.0136
666	29	A_30_P01018561	A_55_P2183837	0.761905	0.0133
667	30	A_30_P01018561	A_55_P2255146	0.880952	0.0028
668	31	A_30_P01018561	A_55_P2322961	0.738095	0.0162
669	32	A_30_P01018561	A_55_P2342537	0.761905	0.0141
670	33	A_30_P01018561	A_55_P2393543	0.97619	0
671	34	A_30_P01018561	A_55_P2393558	0.785714	0.0121
672	35	A_30_P01018561	A_55_P2426799	0.833333	0.0067
673	36	A_30_P01018561	A_51_P115471	-0.809524	0.0076
674	37	A_30_P01018561	A_51_P298837	-0.785714	0.0108
675	38	A_30_P01018561	A_52_P344424	0.857143	0.0027
676	39	A_30_P01018561	A_52_P770640	-0.809524	0.0075
677	40	A_30_P01018561	A_55_P1954346	0.714286	0.0226
678	41	A_30_P01018561	A_55_P1970131	-0.833333	0.0049
679	42	A_30_P01018561	A_55_P2083283	-0.714286	0.0213
680	43	A_30_P01018561	A_55_P2140676	-0.952381	0.0003
681	44	A_30_P01018561	A_55_P2163319	0.714286	0.0219
682	45	A_30_P01018561	A_55_P2290443	-0.952381	0.0002
683	1	A_30_P01018797	A_51_P303749	-0.904762	0.0015
684	2	A_30_P01018797	A_51_P342629	0.785714	0.0092
685	3	A_30_P01018797	A_51_P493649	-0.809524	0.0071
686	4	A_30_P01018797	A_52_P148289	-0.904762	0.0011
687	5	A_30_P01018797	A_52_P211418	-0.809524	0.0075
688	6	A_30_P01018797	A_52_P230167	-0.714286	0.0205
689	7	A_30_P01018797	A_52_P243054	0.833333	0.0038
690	8	A_30_P01018797	A_52_P299627	-0.809524	0.0085
691	9	A_30_P01018797	A_52_P81231	0.714286	0.0226
692	10	A_30_P01018797	A_52_P819011	-0.809524	0.0093
693	11	A_30_P01018797	A_55_P1953813	0.785714	0.011
694	12	A_30_P01018797	A_55_P1954945	-0.738095	0.0157
695	13	A_30_P01018797	A_55_P1982585	-0.928571	0.0009
696	14	A_30_P01018797	A_55_P1994339	-0.809524	0.0082
697	15	A_30_P01018797	A_55_P1996742	-0.714286	0.0226
698	16	A_30_P01018797	A_55_P2018904	-0.785714	0.0098
699	17	A_30_P01018797	A_55_P2052166	0.809524	0.0084
700	18	A_30_P01018797	A_55_P2092441	-0.880952	0.0018
701	19	A_30_P01018797	A_55_P2096797	-0.97619	0
702	20	A_30_P01018797	A_55_P2097264	-0.833333	0.0059
703	21	A_30_P01018797	A_55_P2123912	-0.738095	0.0173
704	22	A_30_P01018797	A_55_P2145136	-0.738095	0.0225
705	23	A_30_P01018797	A_55_P2191303	-0.785714	0.0093
706	24	A_30_P01018797	A_55_P2201831	0.785714	0.0118
707	25	A_30_P01018797	A_55_P2363902	0.761905	0.0139
708	26	A_30_P01018797	A_55_P2369534	-0.928571	0.0006
709	27	A_30_P01018797	A_66_P133153	-0.880952	0.0033
710	28	A_30_P01018797	A_51_P235002	-0.738095	0.0182
711	29	A_30_P01018797	A_51_P342773	-0.714286	0.0227
712	30	A_30_P01018797	A_51_P432011	-0.738095	0.0185
713	31	A_30_P01018797	A_51_P500541	-0.809524	0.0075
714	32	A_30_P01018797	A_52_P398998	-0.857143	0.0042
715	33	A_30_P01018797	A_52_P560848	0.880952	0.0019
716	34	A_30_P01018797	A_52_P605556	-0.785714	0.0104
717	35	A_30_P01018797	A_55_P1994132	0.761905	0.0141
718	36	A_30_P01018797	A_55_P2007131	-0.761905	0.0141
719	37	A_30_P01018797	A_55_P2019312	-0.809524	0.0066
720	38	A_30_P01018797	A_55_P2082880	-0.714286	0.0215
721	39	A_30_P01018797	A_55_P2088375	-0.761905	0.0162
722	40	A_30_P01018797	A_55_P2088945	-0.833333	0.0051
723	41	A_30_P01018797	A_55_P2125997	-0.809524	0.0071
724	42	A_30_P01018797	A_55_P2305319	-0.761905	0.0133
725	43	A_30_P01018797	A_55_P2307713	0.833333	0.0056
726	44	A_30_P01018797	A_55_P2420814	0.904762	0.001
727	1	A_30_P01018846	A_51_P394104	0.809524	0.0075
728	2	A_30_P01018846	A_55_P1986823	0.857143	0.0029
729	3	A_30_P01018846	A_55_P2052136	0.714286	0.0234
730	4	A_30_P01018846	A_55_P2054315	0.809524	0.0082
731	5	A_30_P01018846	A_55_P2054703	0.785714	0.0105
732	6	A_30_P01018846	A_55_P2057168	0.714286	0.0231
733	7	A_30_P01018846	A_55_P2057856	0.857143	0.0031
734	8	A_30_P01018846	A_55_P2060269	0.714286	0.0225
735	9	A_30_P01018846	A_55_P2063508	0.880952	0.0021
736	10	A_30_P01018846	A_55_P2077623	0.714286	0.0193
737	11	A_30_P01018846	A_55_P2116593	0.738095	0.0182
738	12	A_30_P01018846	A_55_P2117506	0.761905	0.0107
739	13	A_30_P01018846	A_55_P2143601	0.857143	0.0039
740	14	A_30_P01018846	A_55_P2154005	0.785714	0.0108
741	15	A_30_P01018846	A_55_P2168271	0.833333	0.0043
742	16	A_30_P01018846	A_55_P2317575	0.809524	0.0085
743	17	A_30_P01018846	A_55_P2389518	0.785714	0.0113
744	18	A_30_P01018846	A_66_P129940	0.714286	0.021
745	19	A_30_P01018846	A_51_P432607	-0.714286	0.022
746	1	A_30_P01018968	A_51_P245895	0.761905	0.0115
747	2	A_30_P01018968	A_51_P303749	0.904762	0.001
748	3	A_30_P01018968	A_52_P148289	0.738095	0.0168
749	4	A_30_P01018968	A_52_P211418	0.761905	0.0145
750	5	A_30_P01018968	A_52_P230167	0.833333	0.0047
751	6	A_30_P01018968	A_52_P243054	-0.714286	0.0201
752	7	A_30_P01018968	A_52_P520940	0.904762	0.0011
753	8	A_30_P01018968	A_55_P1954945	0.904762	0.0011
754	9	A_30_P01018968	A_55_P1982585	0.785714	0.0105
755	10	A_30_P01018968	A_55_P1987186	0.761905	0.0125
756	11	A_30_P01018968	A_55_P1994339	0.761905	0.0151
757	12	A_30_P01018968	A_55_P2052166	-0.714286	0.0228
758	13	A_30_P01018968	A_55_P2054315	0.785714	0.0119
759	14	A_30_P01018968	A_55_P2057881	0.738095	0.0187
760	15	A_30_P01018968	A_55_P2070331	0.714286	0.0245
761	16	A_30_P01018968	A_55_P2096797	0.738095	0.0224
762	17	A_30_P01018968	A_55_P2097264	0.761905	0.0117
763	18	A_30_P01018968	A_55_P2147956	0.761905	0.0141
764	19	A_30_P01018968	A_55_P2389518	0.857143	0.0038
765	20	A_30_P01018968	A_66_P109624	0.809524	0.0082
766	21	A_30_P01018968	A_66_P114705	-0.880952	0.0034
767	22	A_30_P01018968	A_51_P128320	-0.904762	0.0012
768	23	A_30_P01018968	A_51_P183561	0.809524	0.008
769	24	A_30_P01018968	A_51_P235002	0.809524	0.0074
770	25	A_30_P01018968	A_51_P342773	0.761905	0.0131
771	26	A_30_P01018968	A_51_P423825	0.761905	0.0145
772	27	A_30_P01018968	A_52_P560848	-0.880952	0.0031
773	28	A_30_P01018968	A_55_P2073094	-0.833333	0.0043
774	29	A_30_P01018968	A_55_P2088375	0.714286	0.0232
775	30	A_30_P01018968	A_55_P2088945	0.714286	0.0241
776	31	A_30_P01018968	A_55_P2099770	-0.809524	0.0067
777	32	A_30_P01018968	A_55_P2119633	0.928571	0.0007
778	33	A_30_P01018968	A_55_P2134725	-0.857143	0.0029
779	34	A_30_P01018968	A_55_P2305319	0.714286	0.0245
780	35	A_30_P01018968	A_55_P2420814	-0.880952	0.002
781	36	A_30_P01018968	A_66_P116451	0.714286	0.0219
782	1	A_30_P01019012	A_51_P104172	0.714286	0.0244
783	2	A_30_P01019012	A_51_P166266	0.714286	0.024
784	3	A_30_P01019012	A_51_P270355	0.714286	0.0224
785	4	A_30_P01019012	A_51_P270426	0.833333	0.0047
786	5	A_30_P01019012	A_52_P279110	0.857143	0.004
787	6	A_30_P01019012	A_52_P515880	0.809524	0.0076
788	7	A_30_P01019012	A_52_P58359	0.714286	0.0236
789	8	A_30_P01019012	A_55_P1956497	0.738095	0.0188
790	9	A_30_P01019012	A_55_P1962400	0.761905	0.014
791	10	A_30_P01019012	A_55_P1966369	0.880952	0.0022
792	11	A_30_P01019012	A_55_P1987379	0.738095	0.0179
793	12	A_30_P01019012	A_55_P2006625	0.714286	0.0233
794	13	A_30_P01019012	A_55_P2018841	0.761905	0.0137
795	14	A_30_P01019012	A_55_P2032449	0.761905	0.0128
796	15	A_30_P01019012	A_55_P2035824	0.761905	0.0151
797	16	A_30_P01019012	A_55_P2035882	0.714286	0.0213
798	17	A_30_P01019012	A_55_P2057168	0.785714	0.0097
799	18	A_30_P01019012	A_55_P2064955	0.785714	0.0115
800	19	A_30_P01019012	A_55_P2077623	0.880952	0.0018
801	20	A_30_P01019012	A_55_P2079535	0.690476	0.0239
802	21	A_30_P01019012	A_55_P2096324	0.952381	0.0003
803	22	A_30_P01019012	A_55_P2117506	0.809524	0.0063
804	23	A_30_P01019012	A_55_P2118552	0.857143	0.0044
805	24	A_30_P01019012	A_55_P2134172	0.714286	0.0237
806	25	A_30_P01019012	A_55_P2138966	0.738095	0.0198
807	26	A_30_P01019012	A_55_P2141167	0.761905	0.0137
808	27	A_30_P01019012	A_55_P2148746	0.833333	0.0057
809	28	A_30_P01019012	A_55_P2150352	0.880952	0.0022
810	29	A_30_P01019012	A_55_P2162122	0.714286	0.0226
811	30	A_30_P01019012	A_55_P2288983	0.904762	0.0017
812	31	A_30_P01019012	A_55_P2359110	0.761905	0.0158
813	32	A_30_P01019012	A_55_P2383083	0.833333	0.0043
814	33	A_30_P01019012	A_55_P2418824	0.809524	0.0074
815	34	A_30_P01019012	A_66_P109460	0.857143	0.0043
816	35	A_30_P01019012	A_66_P119771	0.714286	0.023
817	36	A_30_P01019012	A_51_P408974	-0.761905	0.0149
818	37	A_30_P01019012	A_51_P501803	-0.809524	0.0072
819	38	A_30_P01019012	A_55_P1957238	-0.904762	0.0012
820	39	A_30_P01019012	A_55_P1996251	-0.714286	0.0249
821	40	A_30_P01019012	A_55_P2004026	-0.761905	0.0162
822	41	A_30_P01019012	A_55_P2353743	-0.690476	0.0238
823	42	A_30_P01019012	A_55_P2372198	-0.857143	0.0032
824	43	A_30_P01019012	A_66_P137374	-0.785714	0.0119
825	1	A_30_P01019252	A_51_P348792	0.904762	0.0009
826	2	A_30_P01019252	A_51_P394104	0.952381	0.0002
827	3	A_30_P01019252	A_51_P504704	0.738095	0.0193
828	4	A_30_P01019252	A_52_P148952	0.761905	0.0137
829	5	A_30_P01019252	A_52_P502226	0.880952	0.0025
830	6	A_30_P01019252	A_55_P1998204	0.785714	0.0113
831	7	A_30_P01019252	A_55_P2001966	0.880952	0.0015
832	8	A_30_P01019252	A_55_P2006053	0.761905	0.0162
833	9	A_30_P01019252	A_55_P2028517	0.738095	0.0153
834	10	A_30_P01019252	A_55_P2034491	0.714286	0.0206
835	11	A_30_P01019252	A_55_P2041549	0.761905	0.015
836	12	A_30_P01019252	A_55_P2047877	0.785714	0.0123
837	13	A_30_P01019252	A_55_P2052136	0.904762	0.0008
838	14	A_30_P01019252	A_55_P2057856	0.809524	0.0071
839	15	A_30_P01019252	A_55_P2059283	0.857143	0.0045
840	16	A_30_P01019252	A_55_P2063508	0.761905	0.014
841	17	A_30_P01019252	A_55_P2091931	0.785714	0.0115
842	18	A_30_P01019252	A_55_P2100725	0.833333	0.0053
843	19	A_30_P01019252	A_55_P2116593	0.880952	0.0028
844	20	A_30_P01019252	A_55_P2117055	0.738095	0.0205
845	21	A_30_P01019252	A_55_P2117506	0.714286	0.0237
846	22	A_30_P01019252	A_55_P2132010	0.738095	0.0179
847	23	A_30_P01019252	A_55_P2142404	0.714286	0.0224
848	24	A_30_P01019252	A_55_P2143601	0.738095	0.0204
849	25	A_30_P01019252	A_55_P2144745	0.714286	0.0222
850	26	A_30_P01019252	A_55_P2154005	0.952381	0.0003
851	27	A_30_P01019252	A_55_P2263277	0.761905	0.0146
852	28	A_30_P01019252	A_55_P2293013	0.880952	0.0022
853	29	A_30_P01019252	A_55_P2317575	0.904762	0.0013
854	30	A_30_P01019252	A_66_P119757	0.809524	0.0084
855	31	A_30_P01019252	A_66_P128564	0.714286	0.0237
856	32	A_30_P01019252	A_66_P139233	0.785714	0.0107
857	33	A_30_P01019252	A_66_P139367	0.785714	0.0102
858	34	A_30_P01019252	A_55_P1988784	-0.761905	0.0126
859	1	A_30_P01019400	A_51_P426994	0.785714	0.0117
860	2	A_30_P01019400	A_52_P73498	0.904762	0.001
861	3	A_30_P01019400	A_52_P7513	0.738095	0.0191
862	4	A_30_P01019400	A_55_P1952998	0.714286	0.0203
863	5	A_30_P01019400	A_55_P1973950	0.785714	0.011
864	6	A_30_P01019400	A_55_P1981035	0.833333	0.0062
865	7	A_30_P01019400	A_55_P1986823	0.809524	0.0078
866	8	A_30_P01019400	A_55_P1995283	0.785714	0.0111
867	9	A_30_P01019400	A_55_P2003931	0.785714	0.0116
868	10	A_30_P01019400	A_55_P2042183	0.761905	0.0125
869	11	A_30_P01019400	A_55_P2054703	0.833333	0.0046
870	12	A_30_P01019400	A_55_P2057856	0.714286	0.021
871	13	A_30_P01019400	A_55_P2060269	0.714286	0.0202
872	14	A_30_P01019400	A_55_P2063508	0.809524	0.0077
873	15	A_30_P01019400	A_55_P2066444	0.714286	0.0227
874	16	A_30_P01019400	A_55_P2082489	0.952381	0
875	17	A_30_P01019400	A_55_P2093624	0.857143	0.0026
876	18	A_30_P01019400	A_55_P2143622	0.714286	0.0235
877	19	A_30_P01019400	A_55_P2144586	0.738095	0.0192
878	20	A_30_P01019400	A_55_P2150349	0.904762	0.0009
879	21	A_30_P01019400	A_55_P2167818	0.714286	0.0211
880	22	A_30_P01019400	A_55_P2168271	0.785714	0.0083
881	23	A_30_P01019400	A_55_P2175296	0.738095	0.0173
882	24	A_30_P01019400	A_55_P2185068	0.785714	0.011
883	25	A_30_P01019400	A_55_P2295282	-0.761905	0.0139
884	26	A_30_P01019400	A_66_P122719	0.809524	0.0071
885	27	A_30_P01019400	A_66_P129940	0.714286	0.0214
886	28	A_30_P01019400	A_51_P250001	0.714286	0.0238
887	29	A_30_P01019400	A_52_P770640	-0.785714	0.011
888	30	A_30_P01019400	A_55_P1953968	0.785714	0.0123
889	31	A_30_P01019400	A_55_P1980826	0.809524	0.0095
890	32	A_30_P01019400	A_55_P1983944	-0.785714	0.0112
891	1	A_30_P01019434	A_51_P443032	0.833333	0.0054
892	2	A_30_P01019434	A_51_P445211	0.690476	0.0247
893	3	A_30_P01019434	A_52_P525725	0.904762	0.0017
894	4	A_30_P01019434	A_52_P81231	0.809524	0.008
895	5	A_30_P01019434	A_55_P1969949	0.928571	0.0012
896	6	A_30_P01019434	A_55_P1977204	0.904762	0.0016
897	7	A_30_P01019434	A_55_P1991421	0.809524	0.0086
898	8	A_30_P01019434	A_55_P2006053	0.785714	0.0124
899	9	A_30_P01019434	A_55_P2071566	0.738095	0.0198
900	10	A_30_P01019434	A_55_P2073208	0.714286	0.0229
901	11	A_30_P01019434	A_55_P2087345	0.952381	0
902	12	A_30_P01019434	A_55_P2143601	0.738095	0.0185
903	13	A_30_P01019434	A_55_P2162970	0.809524	0.0083
904	14	A_30_P01019434	A_55_P2169989	0.904762	0.0014
905	15	A_30_P01019434	A_55_P2243277	0.761905	0.0161
906	16	A_30_P01019434	A_55_P2322961	0.761905	0.0145
907	17	A_30_P01019434	A_66_P136735	0.738095	0.021
908	18	A_30_P01019434	A_51_P183561	-0.857143	0.0038
909	19	A_30_P01019434	A_51_P235002	-0.857143	0.0047
910	20	A_30_P01019434	A_51_P342773	-0.904762	0.0013
911	21	A_30_P01019434	A_51_P347529	-0.738095	0.02
912	22	A_30_P01019434	A_55_P2088375	-0.785714	0.0109
913	23	A_30_P01019434	A_55_P2119633	-0.761905	0.0152
914	24	A_30_P01019434	A_55_P2122619	-0.880952	0.0026
915	25	A_30_P01019434	A_55_P2152225	-0.738095	0.0192
916	26	A_30_P01019434	A_55_P2305319	-0.785714	0.0102
917	1	A_30_P01019525	A_51_P212473	-0.880952	0.0022
918	2	A_30_P01019525	A_51_P342629	0.809524	0.0079
919	3	A_30_P01019525	A_51_P413216	0.738095	0.0189
920	4	A_30_P01019525	A_52_P148952	0.833333	0.0045
921	5	A_30_P01019525	A_52_P299627	-0.833333	0.0044
922	6	A_30_P01019525	A_52_P644865	0.714286	0.0247
923	7	A_30_P01019525	A_52_P72965	0.738095	0.0175
924	8	A_30_P01019525	A_52_P819011	-0.785714	0.0097
925	9	A_30_P01019525	A_55_P1953813	0.809524	0.0076
926	10	A_30_P01019525	A_55_P2007886	0.714286	0.0218
927	11	A_30_P01019525	A_55_P2014657	0.738095	0.0176
928	12	A_30_P01019525	A_55_P2022173	0.833333	0.0057
929	13	A_30_P01019525	A_55_P2023329	0.738095	0.0145
930	14	A_30_P01019525	A_55_P2036095	0.785714	0.0111
931	15	A_30_P01019525	A_55_P2041549	0.714286	0.0229
932	16	A_30_P01019525	A_55_P2059283	0.904762	0.0014
933	17	A_30_P01019525	A_55_P2100725	0.714286	0.022
934	18	A_30_P01019525	A_55_P2116593	0.761905	0.014
935	19	A_30_P01019525	A_55_P2138235	0.738095	0.0194
936	20	A_30_P01019525	A_55_P2176076	0.761905	0.015
937	21	A_30_P01019525	A_55_P2369534	-0.785714	0.0121
938	22	A_30_P01019525	A_66_P119757	0.714286	0.0226
939	23	A_30_P01019525	A_66_P137501	0.761905	0.0148
940	24	A_30_P01019525	A_51_P153513	-0.738095	0.0179
941	25	A_30_P01019525	A_51_P285856	0.809524	0.0079
942	26	A_30_P01019525	A_52_P398998	-0.833333	0.0063
943	27	A_30_P01019525	A_52_P40504	-0.97619	0
944	28	A_30_P01019525	A_55_P1970131	0.761905	0.0136
945	29	A_30_P01019525	A_55_P1974957	0.857143	0.0033
946	30	A_30_P01019525	A_55_P2116621	-0.738095	0.0171
947	31	A_30_P01019525	A_55_P2307713	0.809524	0.0073
948	32	A_30_P01019525	A_55_P2399499	0.928571	0.0006
949	1	A_30_P01019550	A_51_P247496	0.809524	0.0065
950	2	A_30_P01019550	A_51_P348792	0.809524	0.0077
951	3	A_30_P01019550	A_51_P394104	0.809524	0.0073
952	4	A_30_P01019550	A_51_P401501	0.714286	0.0232
953	5	A_30_P01019550	A_51_P443032	0.714286	0.023
954	6	A_30_P01019550	A_52_P205603	0.714286	0.0241
955	7	A_30_P01019550	A_52_P463154	0.833333	0.0055
956	8	A_30_P01019550	A_52_P502226	0.738095	0.0155
957	9	A_30_P01019550	A_52_P525725	0.738095	0.0194
958	10	A_30_P01019550	A_52_P589763	0.809524	0.0069
959	11	A_30_P01019550	A_52_P636050	0.714286	0.0223
960	12	A_30_P01019550	A_52_P84347	0.857143	0.0035
961	13	A_30_P01019550	A_55_P1977528	0.714286	0.0233
962	14	A_30_P01019550	A_55_P1987379	0.738095	0.0172
963	15	A_30_P01019550	A_55_P1990864	0.761905	0.0138
964	16	A_30_P01019550	A_55_P1995283	0.714286	0.0229
965	17	A_30_P01019550	A_55_P1998204	0.880952	0.0026
966	18	A_30_P01019550	A_55_P2000888	0.714286	0.0225
967	19	A_30_P01019550	A_55_P2001966	0.785714	0.0097
968	20	A_30_P01019550	A_55_P2006053	0.904762	0.0008
969	21	A_30_P01019550	A_55_P2022173	0.738095	0.0174
970	22	A_30_P01019550	A_55_P2024282	0.809524	0.009
971	23	A_30_P01019550	A_55_P2028517	0.833333	0.0055
972	24	A_30_P01019550	A_55_P2035882	0.785714	0.0109
973	25	A_30_P01019550	A_55_P2047877	0.928571	0.0002
974	26	A_30_P01019550	A_55_P2052136	0.952381	0.0002
975	27	A_30_P01019550	A_55_P2057856	0.904762	0.0009
976	28	A_30_P01019550	A_55_P2059283	0.714286	0.0234
977	29	A_30_P01019550	A_55_P2059732	0.714286	0.0234
978	30	A_30_P01019550	A_55_P2063508	0.857143	0.0044
979	31	A_30_P01019550	A_55_P2071566	0.880952	0.0029
980	32	A_30_P01019550	A_55_P2091931	0.833333	0.006
981	33	A_30_P01019550	A_55_P2100725	0.880952	0.0021
982	34	A_30_P01019550	A_55_P2116593	0.738095	0.0192
983	35	A_30_P01019550	A_55_P2117055	0.833333	0.0045
984	36	A_30_P01019550	A_55_P2117506	0.857143	0.0034
985	37	A_30_P01019550	A_55_P2117950	0.738095	0.0173
986	38	A_30_P01019550	A_55_P2132010	0.833333	0.0053
987	39	A_30_P01019550	A_55_P2143601	0.833333	0.0053
988	40	A_30_P01019550	A_55_P2148748	0.714286	0.0205
989	41	A_30_P01019550	A_55_P2154005	0.857143	0.0041
990	42	A_30_P01019550	A_55_P2169544	0.738095	0.0177
991	43	A_30_P01019550	A_55_P2263277	0.714286	0.0225
992	44	A_30_P01019550	A_55_P2293013	0.785714	0.012
993	45	A_30_P01019550	A_55_P2316682	0.738095	0.0197
994	46	A_30_P01019550	A_55_P2317575	0.857143	0.0043
995	47	A_30_P01019550	A_55_P2341358	0.761905	0.0149
996	48	A_30_P01019550	A_66_P129940	0.714286	0.0221
997	49	A_30_P01019550	A_66_P136735	0.880952	0.0021
998	50	A_30_P01019550	A_66_P137501	0.714286	0.0231
999	51	A_30_P01019550	A_66_P139367	0.833333	0.0047
1000	52	A_30_P01019550	A_51_P347529	-0.785714	0.0101
1001	53	A_30_P01019550	A_55_P2152225	-0.714286	0.0231
1002	1	A_30_P01019650	A_51_P166266	0.880952	0.0015
1003	2	A_30_P01019650	A_51_P247496	0.761905	0.0156
1004	3	A_30_P01019650	A_52_P84347	0.880952	0.0025
1005	4	A_30_P01019650	A_55_P1966369	0.761905	0.0158
1006	5	A_30_P01019650	A_55_P1986823	0.761905	0.0118
1007	6	A_30_P01019650	A_55_P1987379	0.833333	0.0036
1008	7	A_30_P01019650	A_55_P1991421	0.738095	0.0194
1009	8	A_30_P01019650	A_55_P1998204	0.738095	0.0173
1010	9	A_30_P01019650	A_55_P2000888	0.761905	0.015
1011	10	A_30_P01019650	A_55_P2006053	0.761905	0.0155
1012	11	A_30_P01019650	A_55_P2014657	0.785714	0.0124
1013	12	A_30_P01019650	A_55_P2022173	0.761905	0.0126
1014	13	A_30_P01019650	A_55_P2028517	0.714286	0.0213
1015	14	A_30_P01019650	A_55_P2035882	0.785714	0.01
1016	15	A_30_P01019650	A_55_P2041549	0.833333	0.0047
1017	16	A_30_P01019650	A_55_P2047877	0.809524	0.0091
1018	17	A_30_P01019650	A_55_P2057168	0.809524	0.0072
1019	18	A_30_P01019650	A_55_P2057856	0.857143	0.0031
1020	19	A_30_P01019650	A_55_P2063508	0.904762	0.0006
1021	20	A_30_P01019650	A_55_P2071566	0.857143	0.0041
1022	21	A_30_P01019650	A_55_P2100725	0.738095	0.0175
1023	22	A_30_P01019650	A_55_P2116593	0.761905	0.014
1024	23	A_30_P01019650	A_55_P2117055	0.785714	0.0114
1025	24	A_30_P01019650	A_55_P2117506	0.809524	0.0091
1026	25	A_30_P01019650	A_55_P2143601	0.738095	0.0174
1027	26	A_30_P01019650	A_55_P2154005	0.761905	0.0118
1028	27	A_30_P01019650	A_55_P2169544	0.809524	0.0079
1029	28	A_30_P01019650	A_55_P2316682	0.738095	0.0197
1030	29	A_30_P01019650	A_55_P2317575	0.785714	0.0111
1031	30	A_30_P01019650	A_55_P2341358	0.809524	0.0077
1032	31	A_30_P01019650	A_66_P131137	0.880952	0.0024
1033	32	A_30_P01019650	A_66_P136735	0.857143	0.0027
1034	33	A_30_P01019650	A_66_P137501	0.785714	0.0121
1035	34	A_30_P01019650	A_51_P336049	0.761905	0.014
1036	35	A_30_P01019650	A_55_P1988453	0.714286	0.022
1037	1	A_30_P01019744	A_51_P118400	0.809524	0.0071
1038	2	A_30_P01019744	A_52_P148952	0.785714	0.0108
1039	3	A_30_P01019744	A_52_P240712	0.809524	0.0081
1040	4	A_30_P01019744	A_52_P72965	0.928571	0.0004
1041	5	A_30_P01019744	A_55_P1971599	0.809524	0.0078
1042	6	A_30_P01019744	A_55_P1994453	-0.714286	0.0234
1043	7	A_30_P01019744	A_55_P2013198	0.833333	0.0047
1044	8	A_30_P01019744	A_55_P2014760	0.928571	0.0014
1045	9	A_30_P01019744	A_55_P2026238	-0.738095	0.016
1046	10	A_30_P01019744	A_55_P2032449	0.738095	0.0186
1047	11	A_30_P01019744	A_55_P2040485	0.738095	0.018
1048	12	A_30_P01019744	A_55_P2042183	-0.714286	0.0239
1049	13	A_30_P01019744	A_55_P2053142	-0.809524	0.0071
1050	14	A_30_P01019744	A_55_P2071176	1	0
1051	15	A_30_P01019744	A_55_P2086750	0.714286	0.024
1052	16	A_30_P01019744	A_55_P2105321	-0.761905	0.013
1053	17	A_30_P01019744	A_55_P2115131	0.952381	0.0002
1054	18	A_30_P01019744	A_55_P2134172	0.761905	0.0132
1055	19	A_30_P01019744	A_55_P2138966	0.785714	0.0123
1056	20	A_30_P01019744	A_55_P2140286	0.904762	0.0006
1057	21	A_30_P01019744	A_55_P2148333	-0.714286	0.0209
1058	22	A_30_P01019744	A_55_P2162122	0.857143	0.0042
1059	23	A_30_P01019744	A_55_P2176076	0.738095	0.019
1060	24	A_30_P01019744	A_55_P2223502	0.785714	0.013
1061	25	A_30_P01019744	A_55_P2255146	-0.761905	0.0136
1062	26	A_30_P01019744	A_55_P2393543	-0.738095	0.0176
1063	27	A_30_P01019744	A_66_P125439	0.809524	0.0059
1064	28	A_30_P01019744	A_51_P250001	-0.904762	0.0008
1065	29	A_30_P01019744	A_51_P350048	-0.714286	0.0234
1066	30	A_30_P01019744	A_51_P408974	-0.857143	0.0024
1067	31	A_30_P01019744	A_52_P344424	-0.857143	0.0019
1068	32	A_30_P01019744	A_52_P770640	0.785714	0.0092
1069	33	A_30_P01019744	A_55_P1954346	-0.738095	0.0161
1070	34	A_30_P01019744	A_55_P2020981	0.833333	0.0051
1071	35	A_30_P01019744	A_55_P2028004	0.714286	0.0237
1072	36	A_30_P01019744	A_55_P2129442	-0.738095	0.0191
1073	37	A_30_P01019744	A_55_P2130501	-0.952381	0
1074	38	A_30_P01019744	A_55_P2140676	0.809524	0.0072
1075	39	A_30_P01019744	A_55_P2163319	-0.904762	0.0012
1076	1	A_30_P01019821	A_51_P247496	0.761905	0.0156
1077	2	A_30_P01019821	A_51_P401501	0.738095	0.018
1078	3	A_30_P01019821	A_51_P443032	0.904762	0.0012
1079	4	A_30_P01019821	A_52_P139716	0.714286	0.0226
1080	5	A_30_P01019821	A_52_P525725	0.738095	0.0183
1081	6	A_30_P01019821	A_52_P599573	0.857143	0.0038
1082	7	A_30_P01019821	A_52_P636050	0.714286	0.0237
1083	8	A_30_P01019821	A_52_P84347	0.785714	0.0119
1084	9	A_30_P01019821	A_55_P1969949	0.785714	0.0106
1085	10	A_30_P01019821	A_55_P1977204	0.880952	0.0022
1086	11	A_30_P01019821	A_55_P1979888	0.880952	0.002
1087	12	A_30_P01019821	A_55_P1995283	0.714286	0.0244
1088	13	A_30_P01019821	A_55_P1995337	0.761905	0.0147
1089	14	A_30_P01019821	A_55_P2000888	0.714286	0.023
1090	15	A_30_P01019821	A_55_P2024095	0.785714	0.0084
1091	16	A_30_P01019821	A_55_P2040534	0.761905	0.0144
1092	17	A_30_P01019821	A_55_P2047877	0.833333	0.0064
1093	18	A_30_P01019821	A_55_P2051400	0.904762	0.0007
1094	19	A_30_P01019821	A_55_P2053978	0.857143	0.0047
1095	20	A_30_P01019821	A_55_P2071566	0.857143	0.0025
1096	21	A_30_P01019821	A_55_P2081101	0.809524	0.0082
1097	22	A_30_P01019821	A_55_P2115270	0.785714	0.0111
1098	23	A_30_P01019821	A_55_P2117055	0.738095	0.0191
1099	24	A_30_P01019821	A_55_P2117506	0.785714	0.0094
1100	25	A_30_P01019821	A_55_P2118552	0.785714	0.0104
1101	26	A_30_P01019821	A_55_P2134336	0.880952	0.0029
1102	27	A_30_P01019821	A_55_P2148748	0.809524	0.0089
1103	28	A_30_P01019821	A_55_P2153331	0.761905	0.0124
1104	29	A_30_P01019821	A_55_P2299637	0.857143	0.0036
1105	30	A_30_P01019821	A_55_P2316682	0.833333	0.0066
1106	31	A_30_P01019821	A_55_P2322961	0.785714	0.0104
1107	32	A_30_P01019821	A_55_P2342537	0.714286	0.0231
1108	33	A_30_P01019821	A_55_P2359110	0.785714	0.0098
1109	34	A_30_P01019821	A_55_P2387515	0.809524	0.0069
1110	35	A_30_P01019821	A_55_P2393558	0.833333	0.0066
1111	36	A_30_P01019821	A_55_P2418824	0.809524	0.0076
1112	37	A_30_P01019821	A_66_P136735	0.857143	0.0036
1113	38	A_30_P01019821	A_51_P347529	-0.833333	0.0051
1114	39	A_30_P01019821	A_55_P2071354	-0.714286	0.0243
1115	40	A_30_P01019821	A_55_P2152225	-0.857143	0.0021
1116	1	A_30_P01019858	A_51_P243187	0.857143	0.0038
1117	2	A_30_P01019858	A_51_P382407	0.714286	0.021
1118	3	A_30_P01019858	A_51_P385928	0.714286	0.0203
1119	4	A_30_P01019858	A_52_P299627	0.809524	0.0078
1120	5	A_30_P01019858	A_52_P634122	0.785714	0.0091
1121	6	A_30_P01019858	A_52_P819011	0.785714	0.0113
1122	7	A_30_P01019858	A_55_P1952998	0.761905	0.0149
1123	8	A_30_P01019858	A_55_P2011555	0.857143	0.004
[truncated: 10,823 more rows]
